# Supplementary material
Source: publisher figshare collection journal article supplement (https://acs.figshare.com/ndownloader/files/3727108)
Supplement: Supplementary file 1 [file 3727108]

 
data_wpl1_119
 
_audit_creation_method            SHELXL-2014
_chemical_name_systematic
;
 ?
;
_chemical_name_common             ?
_chemical_melting_point           ?
_chemical_formula_moiety          ?
_chemical_formula_sum
 'C111 H72 N6 O12 Zn3' 
_chemical_formula_weight          1877.85

loop_
 _atom_type_symbol
 _atom_type_description
 _atom_type_scat_dispersion_real
 _atom_type_scat_dispersion_imag
 _atom_type_scat_source
 'C'  'C'   0.0040   0.0020
 'XDISP Program in WinGX L.Kissel & R.H.Pratt Acta Cryst A46 170 1990'
 'H'  'H'   0.0000   0.0000
 'XDISP Program in WinGX L.Kissel & R.H.Pratt Acta Cryst A46 170 1990'
 'N'  'N'   0.0076   0.0040
 'XDISP Program in WinGX L.Kissel & R.H.Pratt Acta Cryst A46 170 1990'
 'O'  'O'   0.0132   0.0074
 'XDISP Program in WinGX L.Kissel & R.H.Pratt Acta Cryst A46 170 1990'
 'Zn'  'Zn'   0.2282   1.6718
 'XDISP Program in WinGX L.Kissel & R.H.Pratt Acta Cryst A46 170 1990'
 
_space_group_crystal_system       monoclinic
_space_group_IT_number            5
_space_group_name_H-M_alt         'C 2'
_space_group_name_Hall            'C 2y'
 
_shelx_space_group_comment
;
The symmetry employed for this shelxl refinement is uniquely defined
by the following loop, which should always be used as a source of
symmetry information in preference to the above space-group names.
They are only intended as comments.
;
 
loop_
 _space_group_symop_operation_xyz
 'x, y, z'
 '-x, y, -z'
 'x+1/2, y+1/2, z'
 '-x+1/2, y+1/2, -z'
 
_cell_length_a                    44.091(2)
_cell_length_b                    25.4060(14)
_cell_length_c                    17.1248(9)
_cell_angle_alpha                 90
_cell_angle_beta                  91.176(4)
_cell_angle_gamma                 90
_cell_volume                      19178.7(17)
_cell_formula_units_Z             4
_cell_measurement_temperature     260(2)
_cell_measurement_reflns_used     9679
_cell_measurement_theta_min       2.41 
_cell_measurement_theta_max       25.09 
 
_exptl_crystal_description        Needle 
_exptl_crystal_colour             colourless 
_exptl_crystal_density_meas       ? 
_exptl_crystal_density_method     ?              
_exptl_crystal_density_diffrn     0.650          
_exptl_crystal_F_000              3864
_exptl_transmission_factor_min    ?                                             
_exptl_transmission_factor_max    ?                                             
_exptl_crystal_size_max           0.200
_exptl_crystal_size_mid           0.150
_exptl_crystal_size_min           0.150
_exptl_absorpt_coefficient_mu     0.509
_shelx_estimated_absorpt_T_min    0.905
_shelx_estimated_absorpt_T_max    0.928
_exptl_absorpt_correction_type    multi-scan 
_exptl_absorpt_correction_T_min   0.765
_exptl_absorpt_correction_T_max   0.928
_exptl_absorpt_process_details    'SADABS 2014/2 Bruker AXS Madison WI USA'
 
_exptl_special_details
;
 Crystals were needle, the data was collected on a crystal cut from one of
 these needles. Data were collected at 260K as below this the diffraction 
 pattern were poor probably due to a phase transition.
;
 
_diffrn_ambient_temperature       260(2)
_diffrn_radiation_wavelength      0.7749
_diffrn_radiation_type            synchrotron
_diffrn_source                    'Advanced Light Source station 11.3.1'                       
_diffrn_measurement_device_type   'Bruker APEX II CCD diffractometer'
_diffrn_measurement_method        '\w/\q scans'  
_diffrn_detector_area_resol_mean  ? 
_diffrn_reflns_number             83865
_diffrn_reflns_av_unetI/netI      0.0670
_diffrn_reflns_av_R_equivalents   0.0708
_diffrn_reflns_limit_h_min        -48
_diffrn_reflns_limit_h_max        48
_diffrn_reflns_limit_k_min        -27
_diffrn_reflns_limit_k_max        27
_diffrn_reflns_limit_l_min        -18
_diffrn_reflns_limit_l_max        18
_diffrn_reflns_theta_min          1.746
_diffrn_reflns_theta_max          25.375
_diffrn_reflns_theta_full         25.375
_diffrn_measured_fraction_theta_max   0.986
_diffrn_measured_fraction_theta_full  0.986
_diffrn_reflns_Laue_measured_fraction_max    0.986
_diffrn_reflns_Laue_measured_fraction_full   0.986
_diffrn_reflns_point_group_measured_fraction_max   0.986
_diffrn_reflns_point_group_measured_fraction_full  0.986
_reflns_number_total              26709
_reflns_number_gt                 21842
_reflns_threshold_expression      'I > 2\s(I)'
_reflns_Friedel_coverage          0.948
_reflns_Friedel_fraction_max      0.986
_reflns_Friedel_fraction_full     0.986
 
_reflns_special_details
;
 Reflections were merged by SHELXL according to the crystal
 class for the calculation of statistics and refinement.
 
 Structure factors included contributions from the .fab file.
 
 _reflns_Friedel_fraction is defined as the number of unique
 Friedel pairs measured divided by the number that would be
 possible theoretically, ignoring centric projections and
 systematic absences.
;
 
_computing_data_collection        'Bruker APEX 2'
_computing_cell_refinement        'Bruker SAINT v8.34a'
_computing_data_reduction         'Bruker SAINT v8.34a'
_computing_structure_solution     'Bruker SHELXT 2014/3 (beta test)'
_computing_structure_refinement   'SHELXL-2014 (Sheldrick, 2014)'
_computing_molecular_graphics     'Bruker SHELXTL'
_computing_publication_material   'Bruker SHELXTL & local programs'
 
_refine_special_details
;
 The data were cut at 0.90 Angstroms as I/sigma(I) < 2 and therefore
 on average unobserved. All non-hydrogen atoms were refined
 anisotropically. Hydrogens were placed geometrically, constrained
 and refined using a riding model. Geometrical and displacement
 parameter restrains were use modelling the carboxylate C118 O11 O12,
 there are indication of disorder but no good splt site model could
 be found. Displacement parameter restrains were use to model the
 disordered pyrinyl ring. Once the best structure model was refined
 SQUEEZE was used to remove unresolveable solvent electron density
 from the avoid space in the structure, details can be found at the
 end of this CIF. Refined as a 2-component inversion twin.
;
_vrf_THETM01_wpl1_119
;
PROBLEM: The value of sine(theta_max)/wavelength is less than 0.575
RESPONSE: Data cut at 0.90 Angstroms as I/sigma(I) < 2 and therefore
 on average unobserved
;
_vrf_PLAT230_wpl1_119
;
PROBLEM: Hirshfeld Test Diff for    C31    --  C36     ..       10.8 su    
RESPONSE: These atoms are part of a phenyl ring, which shows disorder. 
 C31 is is on the axis of the system and not disordered while C36 is off
 the axis and show the disordered in the form of increase displacement
 parameters. 
;
_vrf_PLAT234_wpl1_119
;
PROBLEM: Large Hirshfeld Difference O12    --  C118    ..       0.30 Ang.  
RESPONSE: O12 is unbound while C118 is the link via the other oxygen to 
 the metal centre. The increase displacement parameter again indicates 
 this group has some disordered. 
;
_vrf_PLAT241_wpl1_119
;
PROBLEM: High      Ueq as Compared to Neighbors for .....        C32 Check 
RESPONSE: C31 is is on the axis of the system and not disordered while C32
 is off the axis and show the disordered in the form of increase displacement
 parameters.
;
_vrf_PLAT242_wpl1_119_2
;
PROBLEM: Low       Ueq as Compared to Neighbors for .....       C118 Check 
RESPONSE: O12 is unbound while C118 is the link via the other oxygen to 
 the metal centre. The increase displacement parameter again indicates 
 this group has some disordered.
;

_refine_ls_structure_factor_coef  Fsqd
_refine_ls_matrix_type            full
_refine_ls_weighting_scheme       calc
_refine_ls_weighting_details
'w=1/[\s^2^(Fo^2^)+(0.0965P)^2^] where P=(Fo^2^+2Fc^2^)/3'
_atom_sites_solution_primary      Direct
_atom_sites_solution_secondary    difmap
_atom_sites_solution_hydrogens    geom
_refine_ls_hydrogen_treatment     constr
_refine_ls_extinction_method      none
_refine_ls_extinction_coef        .
_refine_ls_abs_structure_details
;
 Refined as an inversion twin.
;
_refine_ls_abs_structure_Flack    0.162(11)
_chemical_absolute_configuration  ?
_refine_ls_number_reflns          26709
_refine_ls_number_parameters      1226
_refine_ls_number_restraints      138
_refine_ls_R_factor_all           0.0688
_refine_ls_R_factor_gt            0.0598
_refine_ls_wR_factor_ref          0.1507
_refine_ls_wR_factor_gt           0.1463
_refine_ls_goodness_of_fit_ref    0.983
_refine_ls_restrained_S_all       0.985
_refine_ls_shift/su_max           0.002
_refine_ls_shift/su_mean          0.000
 
loop_
 _atom_site_label
 _atom_site_type_symbol
 _atom_site_fract_x
 _atom_site_fract_y
 _atom_site_fract_z
 _atom_site_U_iso_or_equiv
 _atom_site_adp_type
 _atom_site_occupancy
 _atom_site_site_symmetry_order  
 _atom_site_calc_flag
 _atom_site_refinement_flags_posn
 _atom_site_refinement_flags_adp
 _atom_site_refinement_flags_occupancy
 _atom_site_disorder_assembly
 _atom_site_disorder_group
Zn1 Zn 0.26573(2) 0.46193(3) 0.35222(4) 0.0607(2) Uani 1 1 d . . . . .
Zn2 Zn 0.10718(2) 0.98844(3) 0.34610(4) 0.0591(2) Uani 1 1 d . . . . .
N1 N 0.25198(13) 0.4167(2) 0.4463(3) 0.0622(14) Uani 1 1 d . . . . .
C2 C 0.2243(2) 0.4162(4) 0.4698(5) 0.101(3) Uani 1 1 d . . . . .
H2A H 0.2101 0.4356 0.4412 0.121 Uiso 1 1 calc R U . . .
C3 C 0.2143(2) 0.3889(4) 0.5344(5) 0.097(3) Uani 1 1 d . . . . .
H3A H 0.1943 0.3916 0.5505 0.117 Uiso 1 1 calc R U . . .
C4 C 0.23515(17) 0.3574(3) 0.5742(4) 0.0683(18) Uani 1 1 d . . . . .
C5 C 0.2630(2) 0.3563(4) 0.5482(5) 0.095(3) Uani 1 1 d . . . . .
H5A H 0.2774 0.3347 0.5726 0.114 Uiso 1 1 calc R U . . .
C6 C 0.27136(17) 0.3871(4) 0.4848(5) 0.087(2) Uani 1 1 d . . . . .
H6A H 0.2915 0.3866 0.4693 0.104 Uiso 1 1 calc R U . . .
C7 C 0.22666(16) 0.3245(3) 0.6433(3) 0.0624(17) Uani 1 1 d . . . . .
C8 C 0.2467(2) 0.3142(4) 0.7006(5) 0.102(3) Uani 1 1 d . . . . .
H8A H 0.2666 0.3261 0.6958 0.122 Uiso 1 1 calc R U . . .
C9 C 0.2389(2) 0.2855(4) 0.7688(5) 0.109(3) Uani 1 1 d . . . . .
H9A H 0.2537 0.2774 0.8066 0.130 Uiso 1 1 calc R U . . .
C10 C 0.20939(18) 0.2702(3) 0.7779(4) 0.0669(18) Uani 1 1 d . . . . .
C11 C 0.1897(2) 0.2798(3) 0.7184(5) 0.088(2) Uani 1 1 d . . . . .
H11A H 0.1700 0.2669 0.7216 0.106 Uiso 1 1 calc R U . . .
C12 C 0.19733(19) 0.3077(4) 0.6540(5) 0.090(2) Uani 1 1 d . . . . .
H12A H 0.1825 0.3156 0.6165 0.108 Uiso 1 1 calc R U . . .
N13 N 0.25203(14) 0.4148(2) 1.2593(3) 0.0711(15) Uani 1 1 d . . . . .
C14 C 0.2698(2) 0.3762(4) 1.2322(5) 0.100(3) Uani 1 1 d . . . . .
H14A H 0.2880 0.3696 1.2588 0.120 Uiso 1 1 calc R U . . .
C15 C 0.2630(2) 0.3464(3) 1.1692(5) 0.097(3) Uani 1 1 d . . . . .
H15A H 0.2761 0.3198 1.1539 0.116 Uiso 1 1 calc R U . . .
C16 C 0.2367(2) 0.3554(3) 1.1280(4) 0.089(3) Uani 1 1 d . . . . .
C17 C 0.2193(2) 0.3970(5) 1.1525(6) 0.114(3) Uani 1 1 d . . . . .
H17A H 0.2019 0.4059 1.1241 0.137 Uiso 1 1 calc R U . . .
C18 C 0.2271(2) 0.4257(4) 1.2180(5) 0.094(3) Uani 1 1 d . . . . .
H18A H 0.2147 0.4532 1.2335 0.113 Uiso 1 1 calc R U . . .
C19 C 0.2280(2) 0.3258(3) 1.0568(4) 0.079(2) Uani 1 1 d . . . . .
C20 C 0.2350(2) 0.2730(3) 1.0489(4) 0.088(2) Uani 1 1 d . . . . .
H20A H 0.2452 0.2557 1.0893 0.106 Uiso 1 1 calc R U . . .
C21 C 0.2270(2) 0.2457(4) 0.9827(4) 0.088(2) Uani 1 1 d . . . . .
H21A H 0.2326 0.2106 0.9786 0.106 Uiso 1 1 calc R U . . .
C22 C 0.21082(19) 0.2691(3) 0.9212(4) 0.072(2) Uani 1 1 d . . . . .
C23 C 0.2058(3) 0.3200(4) 0.9285(5) 0.133(4) Uani 1 1 d . . . A 1
H23A H 0.1963 0.3379 0.8875 0.159 Uiso 1 1 calc R U . A 1
C24 C 0.2144(4) 0.3484(4) 0.9963(6) 0.141(5) Uani 1 1 d . . . A 1
H24A H 0.2103 0.3843 0.9983 0.169 Uiso 1 1 calc R U . A 1
N25 N 0.12322(15) 0.0307(2) 1.2523(3) 0.0692(15) Uani 1 1 d . . . . .
C26 C 0.1325(5) 0.0794(9) 1.2566(11) 0.092(5) Uani 0.5 1 d . U P B 1
H26 H 0.1317 0.0962 1.3048 0.110 Uiso 0.5 1 calc R U P B 1
C27 C 0.1434(5) 0.1076(8) 1.1945(10) 0.094(5) Uani 0.5 1 d . U P B 1
H27 H 0.1501 0.1419 1.2020 0.113 Uiso 0.5 1 calc R U P B 1
C28 C 0.14427(18) 0.0856(3) 1.1219(4) 0.0752(19) Uani 1 1 d . U . . .
C29 C 0.1394(5) 0.0317(8) 1.1231(11) 0.070(5) Uani 0.5 1 d . U P B 1
H29A H 0.1436 0.0120 1.0787 0.084 Uiso 0.5 1 calc R U P B 1
C30 C 0.1289(5) 0.0069(9) 1.1869(11) 0.074(5) Uani 0.5 1 d . U P B 1
H30A H 0.1254 -0.0292 1.1839 0.089 Uiso 0.5 1 calc R U P B 1
C26' C 0.1128(5) 0.0779(8) 1.2373(11) 0.089(5) Uani 0.5 1 d . U P B 2
H26' H 0.0990 0.0932 1.2709 0.106 Uiso 0.5 1 calc R U P B 2
C27' C 0.1220(5) 0.1054(8) 1.1713(10) 0.090(4) Uani 0.5 1 d . U P B 2
H27' H 0.1132 0.1378 1.1599 0.108 Uiso 0.5 1 calc R U P B 2
C29' C 0.1542(5) 0.0352(9) 1.1433(13) 0.084(5) Uani 0.5 1 d . U P B 2
H29' H 0.1686 0.0178 1.1141 0.100 Uiso 0.5 1 calc R U P B 2
C30' C 0.1426(5) 0.0127(10) 1.2059(14) 0.077(5) Uani 0.5 1 d . U P B 2
H30' H 0.1498 -0.0210 1.2173 0.093 Uiso 0.5 1 calc R U P B 2
C31 C 0.15361(19) 0.1138(3) 1.0535(4) 0.073(2) Uani 1 1 d . . . . .
C32 C 0.1691(3) 0.0874(3) 0.9924(5) 0.136(5) Uani 1 1 d . . . . .
H32A H 0.1726 0.0513 0.9956 0.163 Uiso 1 1 calc R U . . .
C33 C 0.1790(2) 0.1157(3) 0.9278(5) 0.096(3) Uani 1 1 d . . . . .
H33A H 0.1885 0.0975 0.8881 0.115 Uiso 1 1 calc R U . . .
C34 C 0.17544(17) 0.1692(3) 0.9199(3) 0.0671(18) Uani 1 1 d . . . . .
C35 C 0.1589(3) 0.1944(3) 0.9789(5) 0.097(3) Uani 1 1 d . . . . .
H35A H 0.1545 0.2300 0.9731 0.117 Uiso 1 1 calc R U . . .
C36 C 0.1489(3) 0.1689(6) 1.0446(5) 0.132(4) Uani 1 1 d . . . . .
H36A H 0.1390 0.1877 1.0831 0.158 Uiso 1 1 calc R U . . .
N37 N 0.12450(13) 0.0331(2) 0.4371(3) 0.0577(13) Uani 1 1 d . . . . .
C38 C 0.10648(16) 0.0645(3) 0.4772(4) 0.073(2) Uani 1 1 d . . . . .
H38A H 0.0864 0.0681 0.4603 0.087 Uiso 1 1 calc R U . . .
C39 C 0.11582(19) 0.0913(3) 0.5411(4) 0.082(2) Uani 1 1 d . . . . .
H39A H 0.1020 0.1118 0.5680 0.098 Uiso 1 1 calc R U . . .
C40 C 0.14596(16) 0.0888(3) 0.5674(3) 0.0631(17) Uani 1 1 d . . . . .
C41 C 0.16476(16) 0.0576(3) 0.5237(3) 0.0624(16) Uani 1 1 d . . . . .
H41A H 0.1852 0.0547 0.5371 0.075 Uiso 1 1 calc R U . . .
C42 C 0.15307(16) 0.0307(3) 0.4603(4) 0.0614(16) Uani 1 1 d . . . . .
H42A H 0.1661 0.0095 0.4322 0.074 Uiso 1 1 calc R U . . .
C43 C 0.15642(17) 0.1175(3) 0.6382(3) 0.0625(17) Uani 1 1 d . . . . .
C44 C 0.1366(2) 0.1298(3) 0.6954(4) 0.085(2) Uani 1 1 d . . . . .
H44A H 0.1162 0.1212 0.6885 0.103 Uiso 1 1 calc R U . . .
C45 C 0.1460(2) 0.1547(4) 0.7632(5) 0.101(3) Uani 1 1 d . . . . .
H45A H 0.1320 0.1629 0.8012 0.121 Uiso 1 1 calc R U . . .
C46 C 0.17668(17) 0.1676(3) 0.7749(4) 0.0667(18) Uani 1 1 d . . . . .
C47 C 0.1964(2) 0.1532(4) 0.7205(4) 0.094(3) Uani 1 1 d . . . . .
H47A H 0.2169 0.1602 0.7284 0.113 Uiso 1 1 calc R U . . .
C48 C 0.18687(18) 0.1281(3) 0.6531(4) 0.079(2) Uani 1 1 d . . . . .
H48A H 0.2011 0.1181 0.6168 0.095 Uiso 1 1 calc R U . . .
C49 C 0.20162(18) 0.2424(3) 0.8485(4) 0.075(2) Uani 1 1 d . . . . .
C50 C 0.18544(18) 0.1958(3) 0.8494(4) 0.070(2) Uani 1 1 d . . . . .
C91 C 0.35543(14) 0.4738(3) 0.3130(4) 0.0666(18) Uani 1 1 d D . . . .
C92 C 0.37192(16) 0.4568(3) 0.3780(4) 0.0707(18) Uani 1 1 d . . . . .
H92A H 0.3617 0.4440 0.4210 0.085 Uiso 1 1 calc R U . . .
C93 C 0.40345(16) 0.4588(3) 0.3801(4) 0.0700(17) Uani 1 1 d . . . . .
H93A H 0.4141 0.4475 0.4244 0.084 Uiso 1 1 calc R U . . .
C94 C 0.41920(16) 0.4777(3) 0.3154(4) 0.080(2) Uani 1 1 d . . . . .
C95 C 0.40169(18) 0.4954(4) 0.2510(4) 0.082(2) Uani 1 1 d . . . . .
H95A H 0.4114 0.5083 0.2073 0.099 Uiso 1 1 calc R U . . .
C96 C 0.37119(18) 0.4939(4) 0.2510(4) 0.086(2) Uani 1 1 d . . . . .
H96A H 0.3604 0.5070 0.2079 0.103 Uiso 1 1 calc R U . . .
C97 C 0.45237(16) 0.4768(3) 0.3150(4) 0.0698(18) Uani 1 1 d . . . . .
C98 C 0.46925(16) 0.4875(4) 0.3817(4) 0.087(2) Uani 1 1 d . . . . .
H98A H 0.4595 0.4929 0.4286 0.104 Uiso 1 1 calc R U . . .
C99 C 0.50144(18) 0.4904(4) 0.3795(4) 0.092(2) Uani 1 1 d . . . . .
H99A H 0.5123 0.4998 0.4246 0.110 Uiso 1 1 calc R U . . .
C100 C 0.51676(16) 0.4798(3) 0.3127(4) 0.080(2) Uani 1 1 d . . . . .
C101 C 0.49941(19) 0.4651(4) 0.2467(4) 0.101(3) Uani 1 1 d . . . . .
H10A H 0.5089 0.4543 0.2014 0.121 Uiso 1 1 calc R U . . .
C102 C 0.46804(16) 0.4667(4) 0.2492(4) 0.086(2) Uani 1 1 d . . . . .
H10B H 0.4571 0.4606 0.2031 0.104 Uiso 1 1 calc R U . . .
C103 C 0.32224(15) 0.4744(3) 0.3117(5) 0.0711(19) Uani 1 1 d D . . . .
O5 O 0.30896(12) 0.4504(2) 0.3688(3) 0.0822(14) Uani 1 1 d . . . . .
O6 O 0.30713(13) 0.4961(3) 0.2602(4) 0.1053(18) Uani 1 1 d . . . . .
C104 C 0.54998(16) 0.4793(3) 0.3082(4) 0.0718(18) Uani 1 1 d . . . . .
O7 O 0.56419(12) 0.4991(2) 0.3684(3) 0.0901(15) Uani 1 1 d . . . . .
O8 O 0.56330(11) 0.4633(2) 0.2515(3) 0.0879(14) Uani 1 1 d . . . . .
Zn3 Zn 0.15742(2) 0.81069(3) 0.01244(4) 0.0665(2) Uani 1 1 d . . . . .
C105 C 0.2057(2) 0.6763(4) 0.0530(5) 0.094(3) Uani 1 1 d . . . . .
C106 C 0.2055(3) 0.6499(5) -0.0173(6) 0.122(4) Uani 1 1 d . . . . .
H10C H 0.1956 0.6645 -0.0606 0.146 Uiso 1 1 calc R U . . .
C107 C 0.2203(3) 0.6010(5) -0.0242(7) 0.142(5) Uani 1 1 d . . . . .
H10D H 0.2179 0.5817 -0.0700 0.171 Uiso 1 1 calc R U . . .
C108 C 0.2384(2) 0.5814(4) 0.0353(6) 0.096(3) Uani 1 1 d . . . . .
C109 C 0.2383(2) 0.6084(4) 0.1054(5) 0.101(3) Uani 1 1 d . . . . .
H10E H 0.2493 0.5947 0.1477 0.121 Uiso 1 1 calc R U . . .
C110 C 0.2226(2) 0.6551(4) 0.1149(5) 0.095(3) Uani 1 1 d . . . . .
H11B H 0.2234 0.6724 0.1628 0.114 Uiso 1 1 calc R U . . .
C111 C 0.2566(2) 0.5332(4) 0.0233(6) 0.103(3) Uani 1 1 d . . . . .
C112 C 0.2705(3) 0.5069(4) 0.0845(7) 0.113(3) Uani 1 1 d . . . . .
H11C H 0.2676 0.5183 0.1354 0.136 Uiso 1 1 calc R U . . .
C113 C 0.2883(3) 0.4644(5) 0.0715(8) 0.132(4) Uani 1 1 d . . . . .
H11D H 0.2975 0.4479 0.1141 0.158 Uiso 1 1 calc R U . . .
C114 C 0.2932(3) 0.4450(4) -0.0007(11) 0.137(5) Uani 1 1 d D U . . .
C115 C 0.2775(5) 0.4684(8) -0.0605(10) 0.193(7) Uani 1 1 d . . . . .
H11E H 0.2797 0.4556 -0.1109 0.232 Uiso 1 1 calc R U . . .
C116 C 0.2590(3) 0.5091(7) -0.0490(9) 0.178(7) Uani 1 1 d . . . . .
H11F H 0.2473 0.5218 -0.0908 0.214 Uiso 1 1 calc R U . . .
C117 C 0.1884(2) 0.7280(3) 0.0585(5) 0.085(2) Uani 1 1 d D . . . .
O9 O 0.17316(14) 0.7400(2) 0.0045(3) 0.0954(17) Uani 1 1 d D . . . .
O10 O 0.19367(15) 0.7537(3) 0.1219(4) 0.117(2) Uani 1 1 d D . . . .
C118 C 0.3121(3) 0.3997(6) -0.0146(10) 0.173(6) Uani 1 1 d D U . . .
O11 O 0.3186(3) 0.3658(3) 0.0233(9) 0.209(6) Uani 1 1 d D U . . .
O12 O 0.3240(5) 0.3948(9) -0.0810(12) 0.366(13) Uani 1 1 d D U . . .
N51 N 0.12663(11) 0.8083(3) 0.1005(3) 0.0663(14) Uani 1 1 d . . . . .
C52 C 0.11972(18) 0.7635(3) 0.1326(4) 0.077(2) Uani 1 1 d . . . . .
H52A H 0.1282 0.7330 0.1125 0.093 Uiso 1 1 calc R U . . .
C53 C 0.10071(19) 0.7591(3) 0.1942(4) 0.081(2) Uani 1 1 d . . . . .
H53A H 0.0965 0.7262 0.2154 0.097 Uiso 1 1 calc R U . . .
C54 C 0.08762(14) 0.8044(3) 0.2253(3) 0.0643(16) Uani 1 1 d . . . . .
C55 C 0.09504(16) 0.8526(3) 0.1899(4) 0.0693(18) Uani 1 1 d . . . . .
H55A H 0.0871 0.8841 0.2081 0.083 Uiso 1 1 calc R U . . .
C56 C 0.11398(15) 0.8520(3) 0.1290(4) 0.0623(16) Uani 1 1 d . . . . .
H56A H 0.1185 0.8839 0.1055 0.075 Uiso 1 1 calc R U . . .
C57 C 0.06869(14) 0.8020(3) 0.2951(4) 0.0643(17) Uani 1 1 d . . . . .
C58 C 0.07385(18) 0.7652(4) 0.3503(4) 0.089(2) Uani 1 1 d . . . . .
H58A H 0.0892 0.7406 0.3437 0.106 Uiso 1 1 calc R U . . .
C59 C 0.05646(18) 0.7637(4) 0.4171(4) 0.088(2) Uani 1 1 d . . . . .
H59A H 0.0605 0.7383 0.4551 0.106 Uiso 1 1 calc R U . . .
C60 C 0.03368(16) 0.7987(3) 0.4277(3) 0.0698(19) Uani 1 1 d . . . . .
C61 C 0.02921(18) 0.8375(3) 0.3728(4) 0.078(2) Uani 1 1 d . . . . .
H61A H 0.0145 0.8630 0.3811 0.094 Uiso 1 1 calc R U . . .
C62 C 0.04590(16) 0.8394(3) 0.3058(4) 0.0679(18) Uani 1 1 d . . . . .
H62A H 0.0421 0.8651 0.2683 0.082 Uiso 1 1 calc R U . . .
N63 N 0.12799(14) 0.8089(3) 0.9136(3) 0.0787(16) Uani 1 1 d . . . . .
C64 C 0.1149(3) 0.7653(4) 0.8925(6) 0.119(4) Uani 1 1 d . . . . .
H64A H 0.1200 0.7348 0.9198 0.143 Uiso 1 1 calc R U . . .
C65 C 0.0937(3) 0.7615(4) 0.8319(6) 0.142(5) Uani 1 1 d . . . . .
H65A H 0.0820 0.7312 0.8260 0.171 Uiso 1 1 calc R U . . .
C66 C 0.09008(17) 0.8023(3) 0.7810(4) 0.078(2) Uani 1 1 d . . . . .
C67 C 0.1067(3) 0.8468(3) 0.8001(5) 0.114(3) Uani 1 1 d . . . . .
H67A H 0.1050 0.8764 0.7684 0.136 Uiso 1 1 calc R U . . .
C68 C 0.1252(3) 0.8482(4) 0.8637(6) 0.123(4) Uani 1 1 d . . . . .
H68A H 0.1367 0.8784 0.8728 0.148 Uiso 1 1 calc R U . . .
C69 C 0.07195(15) 0.7982(3) 0.7088(4) 0.0693(18) Uani 1 1 d . . . . .
C70 C 0.07734(19) 0.8301(4) 0.6457(5) 0.088(2) Uani 1 1 d . . . . .
H70A H 0.0931 0.8545 0.6488 0.106 Uiso 1 1 calc R U . . .
C71 C 0.05986(19) 0.8270(4) 0.5773(4) 0.093(3) Uani 1 1 d . . . . .
H71A H 0.0652 0.8470 0.5342 0.112 Uiso 1 1 calc R U . . .
C72 C 0.03459(15) 0.7944(3) 0.5725(4) 0.0684(18) Uani 1 1 d . . . . .
C73 C 0.02987(18) 0.7613(3) 0.6349(4) 0.079(2) Uani 1 1 d . . . . .
H73A H 0.0144 0.7365 0.6316 0.095 Uiso 1 1 calc R U . . .
C74 C 0.04745(18) 0.7640(3) 0.7019(4) 0.079(2) Uani 1 1 d . . . . .
H74A H 0.0429 0.7423 0.7438 0.095 Uiso 1 1 calc R U . . .
C75 C 0.01524(15) 0.7960(3) 0.5003(3) 0.0655(17) Uani 1 1 d . . . . .
C77 C 0.22569(18) 0.6037(3) 0.3837(4) 0.0739(19) Uani 1 1 d . . . . .
C78 C 0.2274(2) 0.6355(4) 0.4450(5) 0.103(3) Uani 1 1 d . . . . .
H78A H 0.2394 0.6264 0.4883 0.124 Uiso 1 1 calc R U . . .
C79 C 0.2109(2) 0.6835(3) 0.4444(5) 0.092(3) Uani 1 1 d . . . . .
H79A H 0.2117 0.7052 0.4881 0.111 Uiso 1 1 calc R U . . .
C80 C 0.19416(19) 0.6981(3) 0.3822(4) 0.077(2) Uani 1 1 d . . . . .
C81 C 0.1941(2) 0.6657(4) 0.3171(5) 0.092(3) Uani 1 1 d . . . . .
H81A H 0.1837 0.6757 0.2716 0.111 Uiso 1 1 calc R U . . .
C82 C 0.2092(2) 0.6190(4) 0.3199(5) 0.099(3) Uani 1 1 d . . . . .
H82A H 0.2083 0.5970 0.2766 0.119 Uiso 1 1 calc R U . . .
C83 C 0.17659(18) 0.7479(3) 0.3831(4) 0.077(2) Uani 1 1 d . . . . .
C84 C 0.1636(2) 0.7675(3) 0.4498(4) 0.089(2) Uani 1 1 d . . . . .
H84A H 0.1656 0.7483 0.4959 0.107 Uiso 1 1 calc R U . . .
C85 C 0.1482(2) 0.8134(4) 0.4508(4) 0.092(2) Uani 1 1 d . . . . .
H85A H 0.1394 0.8241 0.4970 0.110 Uiso 1 1 calc R U . . .
C86 C 0.14520(15) 0.8443(3) 0.3870(4) 0.0639(17) Uani 1 1 d . . . . .
C87 C 0.15922(17) 0.8288(3) 0.3195(4) 0.078(2) Uani 1 1 d . . . . .
H87A H 0.1583 0.8505 0.2758 0.094 Uiso 1 1 calc R U . . .
C88 C 0.17460(16) 0.7814(3) 0.3157(4) 0.0660(17) Uani 1 1 d . . . . .
H88A H 0.1836 0.7712 0.2695 0.079 Uiso 1 1 calc R U . . .
C89 C 0.24202(19) 0.5516(3) 0.3854(5) 0.078(2) Uani 1 1 d . . . . .
O1 O 0.23674(15) 0.5191(2) 0.3312(3) 0.0966(17) Uani 1 1 d . . . . .
O2 O 0.26152(13) 0.5434(2) 0.4360(4) 0.0884(15) Uani 1 1 d . . . . .
C90 C 0.12734(17) 0.8950(3) 0.3901(4) 0.0692(18) Uani 1 1 d . . . . .
O3 O 0.13098(11) 0.92544(19) 0.3316(3) 0.0715(12) Uani 1 1 d . . . . .
O4 O 0.11293(15) 0.9071(2) 0.4456(3) 0.0973(17) Uani 1 1 d . . . . .
 
loop_
 _atom_site_aniso_label
 _atom_site_aniso_U_11
 _atom_site_aniso_U_22
 _atom_site_aniso_U_33
 _atom_site_aniso_U_23
 _atom_site_aniso_U_13
 _atom_site_aniso_U_12
Zn1 0.0734(5) 0.0577(4) 0.0508(4) -0.0026(3) -0.0060(3) -0.0001(4)
Zn2 0.0719(5) 0.0617(4) 0.0437(4) -0.0059(3) -0.0004(3) 0.0007(4)
N1 0.057(3) 0.064(3) 0.066(3) -0.006(3) 0.000(3) -0.010(3)
C2 0.094(7) 0.131(8) 0.077(5) 0.037(5) -0.010(5) 0.006(6)
C3 0.082(5) 0.123(7) 0.087(6) 0.036(5) 0.008(4) -0.005(5)
C4 0.076(5) 0.082(5) 0.046(4) -0.001(3) -0.006(3) 0.000(4)
C5 0.082(6) 0.127(7) 0.076(5) 0.031(5) 0.003(4) 0.014(5)
C6 0.056(4) 0.117(7) 0.088(5) 0.031(5) -0.005(4) 0.014(4)
C7 0.070(4) 0.078(5) 0.040(3) 0.000(3) 0.008(3) 0.002(3)
C8 0.107(6) 0.122(7) 0.076(5) 0.025(5) -0.001(5) -0.025(6)
C9 0.125(7) 0.134(8) 0.065(5) 0.033(5) -0.027(5) -0.039(6)
C10 0.086(5) 0.063(4) 0.051(4) -0.011(3) -0.002(3) -0.018(4)
C11 0.123(7) 0.054(4) 0.087(6) 0.010(4) -0.004(5) -0.028(4)
C12 0.093(6) 0.099(6) 0.078(5) 0.017(5) -0.002(4) -0.009(5)
N13 0.069(4) 0.074(4) 0.070(4) -0.009(3) -0.012(3) -0.012(3)
C14 0.096(6) 0.110(7) 0.092(6) -0.024(5) -0.030(5) 0.000(6)
C15 0.114(7) 0.074(5) 0.102(6) -0.030(5) -0.033(5) 0.014(5)
C16 0.138(8) 0.068(5) 0.061(4) -0.008(4) 0.002(5) -0.030(5)
C17 0.094(6) 0.149(9) 0.097(7) -0.041(6) -0.027(5) 0.016(6)
C18 0.095(6) 0.098(6) 0.088(6) -0.036(5) -0.023(5) 0.016(5)
C19 0.116(6) 0.070(5) 0.050(4) -0.007(3) -0.014(4) -0.021(4)
C20 0.125(7) 0.080(6) 0.059(4) -0.003(4) -0.018(4) -0.003(5)
C21 0.116(6) 0.091(6) 0.057(4) -0.010(4) -0.012(4) -0.022(5)
C22 0.113(6) 0.058(4) 0.046(4) -0.005(3) 0.005(4) -0.031(4)
C23 0.235(13) 0.105(8) 0.056(5) 0.008(5) -0.045(6) -0.042(8)
C24 0.266(16) 0.080(6) 0.076(6) -0.019(5) -0.008(8) -0.050(8)
N25 0.099(4) 0.060(4) 0.049(3) 0.000(3) 0.007(3) 0.006(3)
C26 0.121(12) 0.095(10) 0.061(9) -0.010(8) 0.015(9) -0.029(11)
C27 0.129(12) 0.090(9) 0.064(9) -0.002(7) 0.013(9) -0.026(10)
C28 0.099(5) 0.074(5) 0.054(4) -0.005(3) 0.007(4) -0.007(4)
C29 0.100(12) 0.064(8) 0.047(9) -0.017(6) 0.007(8) -0.024(9)
C30 0.115(15) 0.067(8) 0.041(9) -0.012(7) 0.017(9) -0.029(10)
C26' 0.107(12) 0.091(10) 0.069(10) -0.002(8) 0.037(10) 0.012(11)
C27' 0.117(11) 0.087(9) 0.069(9) 0.009(8) 0.028(9) 0.014(10)
C29' 0.105(13) 0.079(10) 0.068(11) -0.007(8) 0.018(10) 0.012(10)
C30' 0.090(13) 0.083(10) 0.060(11) -0.007(8) 0.017(9) 0.004(10)
C31 0.107(6) 0.076(5) 0.037(3) -0.003(3) 0.013(3) -0.020(4)
C32 0.288(16) 0.050(5) 0.071(5) 0.004(4) 0.030(7) 0.021(7)
C33 0.150(8) 0.073(6) 0.065(5) 0.001(4) 0.029(5) -0.016(5)
C34 0.097(5) 0.065(5) 0.039(3) -0.011(3) 0.007(3) -0.015(4)
C35 0.176(9) 0.043(4) 0.075(5) 0.007(4) 0.019(5) -0.008(5)
C36 0.165(10) 0.188(13) 0.043(4) -0.012(6) 0.026(5) -0.005(9)
N37 0.080(4) 0.052(3) 0.041(3) -0.009(2) -0.005(3) 0.003(3)
C38 0.057(4) 0.083(5) 0.077(5) -0.030(4) -0.005(3) 0.015(4)
C39 0.097(6) 0.088(5) 0.060(4) -0.021(4) -0.008(4) 0.023(4)
C40 0.081(5) 0.069(4) 0.040(3) 0.001(3) -0.004(3) 0.003(4)
C41 0.071(4) 0.074(4) 0.042(3) -0.006(3) -0.006(3) 0.000(3)
C42 0.065(4) 0.068(4) 0.051(4) -0.001(3) 0.006(3) 0.007(3)
C43 0.084(5) 0.062(4) 0.042(3) 0.001(3) 0.003(3) -0.007(3)
C44 0.104(6) 0.093(6) 0.061(4) -0.008(4) 0.012(4) -0.008(5)
C45 0.128(8) 0.115(7) 0.061(5) -0.030(5) 0.026(5) -0.031(6)
C46 0.087(5) 0.069(4) 0.044(3) -0.002(3) -0.005(3) -0.025(4)
C47 0.097(6) 0.122(7) 0.062(5) -0.032(5) -0.010(4) 0.012(5)
C48 0.076(5) 0.098(6) 0.063(4) -0.012(4) -0.008(4) 0.006(4)
C49 0.090(5) 0.093(5) 0.040(3) -0.010(3) -0.006(3) -0.013(4)
C50 0.103(5) 0.060(4) 0.048(4) -0.013(3) 0.006(3) -0.036(4)
C91 0.069(4) 0.070(5) 0.061(4) -0.013(3) 0.002(3) -0.004(3)
C92 0.076(5) 0.078(5) 0.058(4) -0.014(4) 0.007(3) -0.007(4)
C93 0.072(4) 0.081(5) 0.057(4) -0.010(4) 0.005(3) 0.005(4)
C94 0.073(5) 0.099(6) 0.069(4) -0.028(4) -0.001(4) -0.005(4)
C95 0.081(5) 0.104(6) 0.062(4) 0.009(4) -0.002(4) -0.001(5)
C96 0.086(6) 0.103(6) 0.069(5) 0.008(4) -0.017(4) 0.013(5)
C97 0.073(4) 0.071(5) 0.065(4) -0.010(3) -0.004(3) -0.004(3)
C98 0.069(5) 0.125(6) 0.066(4) -0.014(5) 0.000(3) 0.001(5)
C99 0.087(5) 0.126(7) 0.060(4) -0.027(5) -0.009(4) -0.007(5)
C100 0.066(4) 0.097(6) 0.077(5) -0.004(4) -0.011(4) -0.012(4)
C101 0.093(6) 0.155(8) 0.054(4) -0.031(5) 0.010(4) -0.012(6)
C102 0.061(4) 0.136(7) 0.062(4) -0.022(4) -0.001(3) -0.004(5)
C103 0.058(4) 0.073(5) 0.082(5) -0.021(4) -0.005(4) -0.006(4)
O5 0.082(3) 0.091(4) 0.073(3) -0.017(3) 0.001(3) -0.003(3)
O6 0.078(3) 0.109(5) 0.128(5) 0.029(4) -0.013(3) -0.018(3)
C104 0.071(4) 0.068(5) 0.077(5) -0.011(4) 0.008(4) -0.004(4)
O7 0.083(3) 0.109(4) 0.077(3) -0.014(3) -0.020(3) 0.014(3)
O8 0.078(3) 0.096(4) 0.090(4) -0.020(3) 0.007(3) 0.009(3)
Zn3 0.0707(5) 0.0823(5) 0.0467(4) -0.0002(4) 0.0046(3) 0.0024(4)
C105 0.092(6) 0.120(7) 0.069(5) 0.003(5) -0.001(4) 0.001(5)
C106 0.134(8) 0.141(10) 0.089(6) -0.015(6) -0.026(6) 0.040(8)
C107 0.189(12) 0.126(9) 0.110(8) -0.033(7) -0.049(8) 0.052(9)
C108 0.099(6) 0.087(6) 0.100(7) 0.003(5) -0.020(5) 0.018(5)
C109 0.101(6) 0.133(8) 0.069(5) 0.011(5) -0.004(4) 0.043(6)
C110 0.116(7) 0.100(6) 0.068(5) 0.001(4) 0.000(5) 0.029(5)
C111 0.096(6) 0.125(8) 0.087(6) 0.009(6) -0.001(5) 0.033(6)
C112 0.126(8) 0.092(7) 0.123(8) 0.016(6) 0.005(6) 0.010(6)
C113 0.121(8) 0.116(8) 0.159(11) 0.013(8) -0.005(7) 0.062(7)
C114 0.112(8) 0.104(8) 0.198(14) 0.010(8) 0.042(9) 0.048(6)
C115 0.241(18) 0.198(17) 0.142(12) -0.047(12) 0.040(12) 0.076(16)
C116 0.166(12) 0.219(16) 0.148(12) -0.035(11) -0.039(9) 0.110(12)
C117 0.097(6) 0.072(5) 0.085(6) -0.012(4) 0.016(5) 0.013(4)
O9 0.112(4) 0.106(4) 0.067(3) -0.003(3) -0.023(3) 0.016(4)
O10 0.112(5) 0.129(5) 0.109(5) -0.018(4) -0.016(4) 0.049(4)
C118 0.138(11) 0.132(11) 0.251(17) -0.002(11) 0.075(11) 0.018(9)
O11 0.237(12) 0.052(4) 0.335(15) 0.016(6) -0.025(10) 0.031(6)
O12 0.36(2) 0.32(2) 0.428(19) 0.032(16) 0.197(18) 0.194(19)
N51 0.057(3) 0.089(4) 0.053(3) -0.004(3) 0.009(2) -0.013(3)
C52 0.093(5) 0.068(5) 0.073(5) -0.006(4) 0.025(4) -0.007(4)
C53 0.095(5) 0.073(5) 0.075(5) 0.001(4) 0.021(4) -0.015(4)
C54 0.067(4) 0.079(5) 0.047(3) -0.011(3) 0.000(3) 0.004(4)
C55 0.071(4) 0.080(5) 0.057(4) -0.009(4) 0.004(3) 0.004(4)
C56 0.066(4) 0.048(4) 0.073(4) -0.005(3) 0.007(3) 0.001(3)
C57 0.057(4) 0.083(5) 0.052(4) -0.002(4) 0.000(3) -0.012(4)
C58 0.080(5) 0.138(8) 0.048(4) 0.002(4) 0.005(3) 0.012(5)
C59 0.080(5) 0.137(7) 0.046(4) 0.012(4) 0.003(3) 0.032(5)
C60 0.074(4) 0.096(5) 0.039(3) 0.007(3) -0.003(3) 0.007(4)
C61 0.082(5) 0.092(5) 0.061(4) -0.002(4) 0.008(4) 0.000(4)
C62 0.071(4) 0.084(5) 0.048(4) 0.001(3) -0.001(3) -0.002(4)
N63 0.095(4) 0.080(4) 0.060(3) 0.004(3) -0.018(3) -0.011(4)
C64 0.168(10) 0.095(7) 0.092(6) 0.029(5) -0.057(6) -0.026(7)
C65 0.217(13) 0.126(8) 0.081(6) 0.046(6) -0.057(7) -0.086(9)
C66 0.090(5) 0.083(5) 0.062(4) 0.016(4) -0.009(3) -0.014(4)
C67 0.199(11) 0.068(5) 0.072(5) 0.012(4) -0.048(6) -0.020(6)
C68 0.207(12) 0.070(5) 0.091(6) 0.030(5) -0.066(7) -0.023(6)
C69 0.063(4) 0.083(5) 0.062(4) 0.016(4) -0.003(3) -0.002(4)
C70 0.081(5) 0.106(6) 0.077(5) 0.011(4) -0.006(4) -0.014(4)
C71 0.086(5) 0.140(8) 0.054(4) 0.031(4) 0.003(4) 0.009(5)
C72 0.064(4) 0.090(5) 0.052(4) 0.001(3) 0.011(3) -0.014(4)
C73 0.081(5) 0.094(6) 0.064(4) 0.000(4) 0.001(4) -0.015(4)
C74 0.077(5) 0.096(6) 0.064(4) 0.016(4) 0.004(4) 0.015(4)
C75 0.075(4) 0.080(5) 0.042(3) 0.000(3) 0.009(3) -0.006(3)
C77 0.093(5) 0.064(4) 0.065(4) -0.001(4) -0.003(4) 0.009(4)
C78 0.133(7) 0.092(6) 0.082(5) 0.001(5) -0.024(5) 0.057(6)
C79 0.143(8) 0.063(5) 0.070(5) -0.015(4) -0.020(5) 0.025(5)
C80 0.107(6) 0.059(4) 0.064(4) -0.008(3) -0.012(4) 0.027(4)
C81 0.108(6) 0.099(6) 0.068(5) -0.004(4) -0.016(4) 0.043(5)
C82 0.124(7) 0.097(7) 0.077(5) -0.023(5) -0.011(5) 0.021(6)
C83 0.088(5) 0.077(5) 0.065(4) -0.009(4) -0.010(4) 0.003(4)
C84 0.125(7) 0.077(5) 0.065(5) 0.008(4) 0.004(4) 0.043(5)
C85 0.134(7) 0.088(6) 0.054(4) 0.001(4) 0.012(4) 0.020(6)
C86 0.066(4) 0.060(4) 0.066(4) -0.009(3) -0.005(3) -0.004(3)
C87 0.084(5) 0.102(6) 0.049(4) -0.006(4) -0.022(3) 0.008(4)
C88 0.076(4) 0.059(4) 0.062(4) -0.010(3) -0.009(3) 0.021(4)
C89 0.081(5) 0.079(5) 0.073(5) 0.018(4) 0.015(4) 0.016(4)
O1 0.123(5) 0.085(4) 0.082(4) -0.012(3) 0.008(3) 0.004(3)
O2 0.086(4) 0.066(3) 0.112(4) 0.006(3) -0.010(3) 0.021(3)
C90 0.075(5) 0.079(5) 0.053(4) -0.013(4) -0.007(3) 0.001(4)
O3 0.081(3) 0.065(3) 0.067(3) 0.000(2) -0.008(2) 0.002(2)
O4 0.136(5) 0.072(3) 0.084(4) -0.005(3) 0.011(4) 0.033(3)
 
_geom_special_details
;
 All esds (except the esd in the dihedral angle between two l.s. planes)
 are estimated using the full covariance matrix.  The cell esds are taken
 into account individually in the estimation of esds in distances, angles
 and torsion angles; correlations between esds in cell parameters are only
 used when they are defined by crystal symmetry.  An approximate (isotropic)
 treatment of cell esds is used for estimating esds involving l.s. planes.
;
 
loop_
 _geom_bond_atom_site_label_1
 _geom_bond_atom_site_label_2
 _geom_bond_distance
 _geom_bond_site_symmetry_2
 _geom_bond_publ_flag
Zn1 O5 1.944(5) . ?
Zn1 O1 1.963(6) . ?
Zn1 N13 2.071(6) 1_554 ?
Zn1 N1 2.080(6) . ?
Zn1 C89 2.576(8) . ?
Zn2 O3 1.933(5) . ?
Zn2 O7 1.960(5) 3_455 ?
Zn2 N37 2.062(5) 1_565 ?
Zn2 N25 2.069(6) 1_564 ?
N1 C2 1.293(11) . ?
N1 C6 1.306(9) . ?
C2 C3 1.385(12) . ?
C3 C4 1.388(11) . ?
C4 C5 1.315(11) . ?
C4 C7 1.502(10) . ?
C5 C6 1.394(11) . ?
C7 C8 1.334(11) . ?
C7 C12 1.378(10) . ?
C8 C9 1.425(12) . ?
C9 C10 1.372(12) . ?
C10 C11 1.347(11) . ?
C10 C49 1.447(10) . ?
C11 C12 1.360(11) . ?
N13 C18 1.323(10) . ?
N13 C14 1.344(11) . ?
N13 Zn1 2.071(6) 1_556 ?
C14 C15 1.348(12) . ?
C15 C16 1.363(13) . ?
C16 C17 1.376(13) . ?
C16 C19 1.477(10) . ?
C17 C18 1.375(12) . ?
C19 C24 1.319(14) . ?
C19 C20 1.385(12) . ?
C20 C21 1.367(11) . ?
C21 C22 1.393(11) . ?
C22 C23 1.319(13) . ?
C22 C49 1.468(9) . ?
C23 C24 1.411(13) . ?
N25 C30' 1.27(2) . ?
N25 C30 1.30(2) . ?
N25 C26 1.31(2) . ?
N25 C26' 1.31(2) . ?
N25 Zn2 2.069(5) 1_546 ?
C26 C27 1.38(2) . ?
C27 C28 1.364(18) . ?
C28 C29 1.39(2) . ?
C28 C29' 1.40(2) . ?
C28 C27' 1.402(19) . ?
C28 C31 1.441(10) . ?
C29 C30 1.35(2) . ?
C26' C27' 1.40(2) . ?
C29' C30' 1.33(3) . ?
C31 C36 1.423(15) . ?
C31 C32 1.428(12) . ?
C32 C33 1.399(12) . ?
C33 C34 1.373(11) . ?
C34 C35 1.413(11) . ?
C34 C50 1.459(9) . ?
C35 C36 1.379(13) . ?
N37 C42 1.315(8) . ?
N37 C38 1.326(8) . ?
N37 Zn2 2.062(5) 1_545 ?
C38 C39 1.347(10) . ?
C39 C40 1.395(10) . ?
C40 C41 1.378(9) . ?
C40 C43 1.483(9) . ?
C41 C42 1.373(9) . ?
C43 C44 1.361(10) . ?
C43 C48 1.388(10) . ?
C44 C45 1.379(11) . ?
C45 C46 1.402(12) . ?
C46 C47 1.338(10) . ?
C46 C50 1.507(9) . ?
C47 C48 1.375(10) . ?
C49 C50 1.382(10) . ?
C91 C96 1.380(10) . ?
C91 C92 1.385(10) . ?
C91 C103 1.463(9) . ?
C92 C93 1.391(10) . ?
C93 C94 1.405(10) . ?
C94 C95 1.406(11) . ?
C94 C97 1.463(10) . ?
C95 C96 1.345(11) . ?
C97 C102 1.358(10) . ?
C97 C98 1.378(10) . ?
C98 C99 1.422(11) . ?
C99 C100 1.368(11) . ?
C100 C101 1.402(10) . ?
C100 C104 1.468(10) . ?
C101 C102 1.385(11) . ?
C103 O6 1.225(9) . ?
C103 O5 1.303(9) . ?
C104 O8 1.215(8) . ?
C104 O7 1.298(9) . ?
O7 Zn2 1.960(5) 3_545 ?
Zn3 O11 1.865(11) 4 ?
Zn3 O9 1.932(6) . ?
Zn3 N51 2.050(5) . ?
Zn3 N63 2.112(6) 1_554 ?
C105 C106 1.377(13) . ?
C105 C110 1.394(12) . ?
C105 C117 1.524(13) . ?
C106 C107 1.410(15) . ?
C107 C108 1.372(14) . ?
C108 C109 1.383(13) . ?
C108 C111 1.484(13) . ?
C109 C110 1.385(12) . ?
C111 C112 1.376(13) . ?
C111 C116 1.388(17) . ?
C112 C113 1.354(14) . ?
C113 C114 1.352(18) . ?
C114 C115 1.36(2) . ?
C114 C118 1.443(13) . ?
C115 C116 1.34(2) . ?
C117 O9 1.171(9) . ?
C117 O10 1.283(10) . ?
C118 O11 1.114(13) . ?
C118 O12 1.267(14) . ?
O11 Zn3 1.865(11) 4_545 ?
N51 C52 1.303(9) . ?
N51 C56 1.339(9) . ?
C52 C53 1.366(10) . ?
C53 C54 1.398(10) . ?
C54 C55 1.407(10) . ?
C54 C57 1.472(9) . ?
C55 C56 1.349(10) . ?
C57 C58 1.344(11) . ?
C57 C62 1.398(10) . ?
C58 C59 1.392(10) . ?
C59 C60 1.356(10) . ?
C60 C61 1.373(10) . ?
C60 C75 1.501(9) . ?
C61 C62 1.376(10) . ?
N63 C64 1.297(11) . ?
N63 C68 1.317(10) . ?
N63 Zn3 2.112(6) 1_556 ?
C64 C65 1.385(13) . ?
C65 C66 1.363(12) . ?
C66 C67 1.382(12) . ?
C66 C69 1.462(10) . ?
C67 C68 1.349(12) . ?
C69 C70 1.375(10) . ?
C69 C74 1.390(11) . ?
C70 C71 1.391(11) . ?
C71 C72 1.389(11) . ?
C72 C73 1.379(10) . ?
C72 C75 1.489(9) . ?
C73 C74 1.373(10) . ?
C75 C75 1.343(13) 2_556 ?
C77 C78 1.326(11) . ?
C77 C82 1.357(11) . ?
C77 C89 1.505(11) . ?
C78 C79 1.421(11) . ?
C79 C80 1.335(11) . ?
C80 C81 1.387(11) . ?
C80 C83 1.483(10) . ?
C81 C82 1.360(12) . ?
C83 C84 1.381(11) . ?
C83 C88 1.434(10) . ?
C84 C85 1.350(11) . ?
C85 C86 1.349(10) . ?
C86 C87 1.380(10) . ?
C86 C90 1.510(10) . ?
C87 C88 1.385(10) . ?
C89 O2 1.227(9) . ?
C89 O1 1.262(10) . ?
C90 O4 1.194(8) . ?
C90 O3 1.279(9) . ?
 
loop_
 _geom_angle_atom_site_label_1
 _geom_angle_atom_site_label_2
 _geom_angle_atom_site_label_3
 _geom_angle
 _geom_angle_site_symmetry_1
 _geom_angle_site_symmetry_3
 _geom_angle_publ_flag
O5 Zn1 O1 140.5(2) . . ?
O5 Zn1 N13 107.1(2) . 1_554 ?
O1 Zn1 N13 96.2(3) . 1_554 ?
O5 Zn1 N1 95.9(2) . . ?
O1 Zn1 N1 110.6(2) . . ?
N13 Zn1 N1 101.0(2) 1_554 . ?
O5 Zn1 C89 120.2(3) . . ?
O1 Zn1 C89 28.4(2) . . ?
N13 Zn1 C89 124.6(3) 1_554 . ?
N1 Zn1 C89 101.1(2) . . ?
O3 Zn2 O7 132.0(2) . 3_455 ?
O3 Zn2 N37 111.1(2) . 1_565 ?
O7 Zn2 N37 96.9(2) 3_455 1_565 ?
O3 Zn2 N25 97.7(2) . 1_564 ?
O7 Zn2 N25 115.3(2) 3_455 1_564 ?
N37 Zn2 N25 100.0(2) 1_565 1_564 ?
C2 N1 C6 116.7(6) . . ?
C2 N1 Zn1 122.6(5) . . ?
C6 N1 Zn1 120.7(5) . . ?
N1 C2 C3 124.9(8) . . ?
C2 C3 C4 117.5(8) . . ?
C5 C4 C3 117.3(7) . . ?
C5 C4 C7 120.3(7) . . ?
C3 C4 C7 122.3(7) . . ?
C4 C5 C6 121.0(8) . . ?
N1 C6 C5 122.4(7) . . ?
C8 C7 C12 116.9(7) . . ?
C8 C7 C4 121.1(7) . . ?
C12 C7 C4 121.8(6) . . ?
C7 C8 C9 122.4(8) . . ?
C10 C9 C8 119.0(8) . . ?
C11 C10 C9 117.4(7) . . ?
C11 C10 C49 124.1(7) . . ?
C9 C10 C49 118.4(7) . . ?
C10 C11 C12 122.8(8) . . ?
C11 C12 C7 121.2(8) . . ?
C18 N13 C14 116.8(7) . . ?
C18 N13 Zn1 121.0(5) . 1_556 ?
C14 N13 Zn1 121.6(5) . 1_556 ?
N13 C14 C15 124.4(8) . . ?
C14 C15 C16 119.5(9) . . ?
C15 C16 C17 116.4(7) . . ?
C15 C16 C19 123.0(9) . . ?
C17 C16 C19 120.4(9) . . ?
C18 C17 C16 121.6(9) . . ?
N13 C18 C17 121.1(8) . . ?
C24 C19 C20 116.2(7) . . ?
C24 C19 C16 122.3(8) . . ?
C20 C19 C16 121.4(7) . . ?
C21 C20 C19 121.2(8) . . ?
C20 C21 C22 122.0(8) . . ?
C23 C22 C21 115.4(7) . . ?
C23 C22 C49 119.4(7) . . ?
C21 C22 C49 125.0(7) . . ?
C22 C23 C24 122.5(10) . . ?
C19 C24 C23 122.3(10) . . ?
C30 N25 C26 115.1(13) . . ?
C30' N25 C26' 116.7(15) . . ?
C30' N25 Zn2 123.1(13) . 1_546 ?
C30 N25 Zn2 120.1(10) . 1_546 ?
C26 N25 Zn2 124.0(9) . 1_546 ?
C26' N25 Zn2 120.2(9) . 1_546 ?
N25 C26 C27 124.3(16) . . ?
C28 C27 C26 120.5(16) . . ?
C27 C28 C29 112.7(12) . . ?
C29' C28 C27' 112.9(13) . . ?
C27 C28 C31 123.4(10) . . ?
C29 C28 C31 123.4(10) . . ?
C29' C28 C31 125.2(11) . . ?
C27' C28 C31 121.8(10) . . ?
C30 C29 C28 121.8(15) . . ?
N25 C30 C29 123.6(17) . . ?
N25 C26' C27' 120.6(15) . . ?
C26' C27' C28 121.9(16) . . ?
C30' C29' C28 119.0(18) . . ?
N25 C30' C29' 129(2) . . ?
C36 C31 C32 117.1(7) . . ?
C36 C31 C28 122.2(7) . . ?
C32 C31 C28 120.7(7) . . ?
C33 C32 C31 120.0(7) . . ?
C34 C33 C32 123.4(8) . . ?
C33 C34 C35 116.0(7) . . ?
C33 C34 C50 120.2(6) . . ?
C35 C34 C50 123.4(6) . . ?
C36 C35 C34 123.2(8) . . ?
C35 C36 C31 120.1(9) . . ?
C42 N37 C38 116.9(5) . . ?
C42 N37 Zn2 122.7(4) . 1_545 ?
C38 N37 Zn2 120.3(5) . 1_545 ?
N37 C38 C39 123.2(7) . . ?
C38 C39 C40 120.8(7) . . ?
C41 C40 C39 115.6(6) . . ?
C41 C40 C43 123.2(6) . . ?
C39 C40 C43 121.3(6) . . ?
C42 C41 C40 119.6(6) . . ?
N37 C42 C41 123.9(6) . . ?
C44 C43 C48 117.2(7) . . ?
C44 C43 C40 120.5(7) . . ?
C48 C43 C40 122.0(6) . . ?
C43 C44 C45 121.6(8) . . ?
C44 C45 C46 120.0(7) . . ?
C47 C46 C45 118.3(6) . . ?
C47 C46 C50 124.1(7) . . ?
C45 C46 C50 117.5(6) . . ?
C46 C47 C48 121.3(8) . . ?
C47 C48 C43 121.4(7) . . ?
C50 C49 C10 124.0(6) . . ?
C50 C49 C22 121.3(6) . . ?
C10 C49 C22 114.6(6) . . ?
C49 C50 C34 124.8(5) . . ?
C49 C50 C46 121.3(5) . . ?
C34 C50 C46 113.9(5) . . ?
C96 C91 C92 118.0(6) . . ?
C96 C91 C103 120.2(7) . . ?
C92 C91 C103 121.6(6) . . ?
C91 C92 C93 121.2(6) . . ?
C92 C93 C94 120.1(7) . . ?
C93 C94 C95 117.1(7) . . ?
C93 C94 C97 120.6(7) . . ?
C95 C94 C97 122.3(7) . . ?
C96 C95 C94 121.6(7) . . ?
C95 C96 C91 122.0(7) . . ?
C102 C97 C98 116.7(6) . . ?
C102 C97 C94 122.2(6) . . ?
C98 C97 C94 121.1(6) . . ?
C97 C98 C99 120.7(6) . . ?
C100 C99 C98 121.4(7) . . ?
C99 C100 C101 117.2(7) . . ?
C99 C100 C104 123.7(7) . . ?
C101 C100 C104 118.9(7) . . ?
C102 C101 C100 119.7(7) . . ?
C97 C102 C101 123.9(7) . . ?
O6 C103 O5 120.3(6) . . ?
O6 C103 C91 123.0(7) . . ?
O5 C103 C91 116.6(7) . . ?
C103 O5 Zn1 105.9(5) . . ?
O8 C104 O7 122.1(7) . . ?
O8 C104 C100 122.9(7) . . ?
O7 C104 C100 114.9(6) . . ?
C104 O7 Zn2 104.1(4) . 3_545 ?
O11 Zn3 O9 117.9(4) 4 . ?
O11 Zn3 N51 130.7(5) 4 . ?
O9 Zn3 N51 105.6(3) . . ?
O11 Zn3 N63 95.5(5) 4 1_554 ?
O9 Zn3 N63 98.1(3) . 1_554 ?
N51 Zn3 N63 100.6(2) . 1_554 ?
C106 C105 C110 118.1(9) . . ?
C106 C105 C117 118.7(8) . . ?
C110 C105 C117 123.1(8) . . ?
C105 C106 C107 120.5(10) . . ?
C108 C107 C106 121.3(10) . . ?
C107 C108 C109 117.0(9) . . ?
C107 C108 C111 120.4(9) . . ?
C109 C108 C111 122.7(8) . . ?
C108 C109 C110 122.4(8) . . ?
C109 C110 C105 120.1(8) . . ?
C112 C111 C116 115.2(10) . . ?
C112 C111 C108 122.0(9) . . ?
C116 C111 C108 122.5(9) . . ?
C113 C112 C111 120.7(11) . . ?
C114 C113 C112 123.1(11) . . ?
C113 C114 C115 116.1(10) . . ?
C113 C114 C118 123.1(15) . . ?
C115 C114 C118 120.7(16) . . ?
C116 C115 C114 122.0(14) . . ?
C115 C116 C111 122.0(13) . . ?
O9 C117 O10 128.8(8) . . ?
O9 C117 C105 117.0(8) . . ?
O10 C117 C105 114.2(8) . . ?
C117 O9 Zn3 112.8(5) . . ?
O11 C118 O12 109.8(15) . . ?
O11 C118 C114 131.6(16) . . ?
O12 C118 C114 118.5(15) . . ?
C118 O11 Zn3 122.1(13) . 4_545 ?
C52 N51 C56 117.8(5) . . ?
C52 N51 Zn3 120.0(5) . . ?
C56 N51 Zn3 122.1(5) . . ?
N51 C52 C53 123.4(7) . . ?
C52 C53 C54 119.4(7) . . ?
C53 C54 C55 116.8(6) . . ?
C53 C54 C57 121.3(7) . . ?
C55 C54 C57 121.8(6) . . ?
C56 C55 C54 118.5(7) . . ?
N51 C56 C55 124.1(7) . . ?
C58 C57 C62 119.4(6) . . ?
C58 C57 C54 120.6(7) . . ?
C62 C57 C54 119.9(6) . . ?
C57 C58 C59 120.6(8) . . ?
C60 C59 C58 120.9(8) . . ?
C59 C60 C61 118.3(6) . . ?
C59 C60 C75 119.8(6) . . ?
C61 C60 C75 121.8(7) . . ?
C60 C61 C62 121.6(7) . . ?
C61 C62 C57 119.0(7) . . ?
C64 N63 C68 115.6(7) . . ?
C64 N63 Zn3 120.2(6) . 1_556 ?
C68 N63 Zn3 123.4(6) . 1_556 ?
N63 C64 C65 123.9(9) . . ?
C66 C65 C64 119.6(9) . . ?
C65 C66 C67 114.5(7) . . ?
C65 C66 C69 122.9(7) . . ?
C67 C66 C69 122.5(7) . . ?
C68 C67 C66 121.6(8) . . ?
N63 C68 C67 123.3(9) . . ?
C70 C69 C74 116.7(7) . . ?
C70 C69 C66 121.5(7) . . ?
C74 C69 C66 121.7(6) . . ?
C69 C70 C71 121.7(8) . . ?
C72 C71 C70 121.0(7) . . ?
C73 C72 C71 116.8(7) . . ?
C73 C72 C75 124.6(6) . . ?
C71 C72 C75 118.6(6) . . ?
C74 C73 C72 121.7(7) . . ?
C73 C74 C69 121.7(7) . . ?
C75 C75 C72 124.2(7) 2_556 . ?
C75 C75 C60 123.6(7) 2_556 . ?
C72 C75 C60 112.2(6) . . ?
C78 C77 C82 118.9(7) . . ?
C78 C77 C89 120.0(7) . . ?
C82 C77 C89 121.1(7) . . ?
C77 C78 C79 119.7(8) . . ?
C80 C79 C78 121.4(7) . . ?
C79 C80 C81 117.9(7) . . ?
C79 C80 C83 120.6(6) . . ?
C81 C80 C83 121.5(7) . . ?
C82 C81 C80 119.7(7) . . ?
C77 C82 C81 122.3(8) . . ?
C84 C83 C88 115.6(7) . . ?
C84 C83 C80 122.7(7) . . ?
C88 C83 C80 121.4(6) . . ?
C85 C84 C83 122.5(7) . . ?
C86 C85 C84 122.4(7) . . ?
C85 C86 C87 118.2(7) . . ?
C85 C86 C90 120.7(6) . . ?
C87 C86 C90 121.1(7) . . ?
C86 C87 C88 121.1(7) . . ?
C87 C88 C83 120.0(6) . . ?
O2 C89 O1 121.6(7) . . ?
O2 C89 C77 119.5(8) . . ?
O1 C89 C77 118.7(8) . . ?
O2 C89 Zn1 73.9(4) . . ?
O1 C89 Zn1 47.7(4) . . ?
C77 C89 Zn1 165.7(6) . . ?
C89 O1 Zn1 103.9(5) . . ?
O4 C90 O3 123.0(7) . . ?
O4 C90 C86 122.4(7) . . ?
O3 C90 C86 114.4(6) . . ?
C90 O3 Zn2 108.8(4) . . ?
 
_refine_diff_density_max    0.660
_refine_diff_density_min   -0.557
_refine_diff_density_rms    0.056

_shelxl_version_number 2014-3

_shelx_res_file
;
TITL wpl1_119 in C2
CELL  0.7749  44.091  25.4060  17.1248   90.000   91.176   90.000
ZERR    4.00   0.002   0.0014   0.0009    0.000    0.004    0.000
LATT -7
SYMM -X, Y, -Z
SFAC C H N O ZN
DISP    C     0.00399    0.00197        13.60
DISP    H     0.00000    0.00000         0.67
DISP    N     0.00762    0.00403        23.92
DISP    O     0.01323    0.00737        40.17
DISP    Zn    0.22822    1.67179      7410.08
UNIT 444 288 24 48 12

TEMP -13.15
SIZE 0.200 0.150 0.150

ACTA 50.75

REM Behind beamstop
OMIT    -2   0   1
OMIT     1   1   1
OMIT     1  -1   1
OMIT    -1  -1   1
OMIT    -1   1   1
OMIT     2   0   1
OMIT     2  -2   0
OMIT     4   0   0
OMIT     2   2   0

REM Data cut at 0.90 Angstroms as I/sigma(I) < 2
REM Solved by SHELXT 2014/3 (beta)
REM Colourless needle (piece cut off)
REM Cell refinement by SAINT v8.34a
REM 9679 input reflections Min.2Th 4.82  Max.2Th 50.17

L.S. 90 0  452
BOND
FMAP 2
PLAN 10

SADI 0.01 C91 C103 C114 C118
SADI 0.01 C117 O9 C118 O11
SADI 0.01 C117 O10 C118 O12
SIMU 0.02 C26 > C30'
DELU 0.04 C26 > C30'
RIGU 0.01 C114 C118 O11 O12

ABIN
TWIN
WGHT    0.096500
BASF   0.16246
FVAR       0.11251
ZN1   5    0.265729    0.461930    0.352217    11.00000    0.07344    0.05769 =
         0.05080   -0.00256   -0.00597   -0.00014
ZN2   5    0.107176    0.988443    0.346100    11.00000    0.07190    0.06166 =
         0.04371   -0.00589   -0.00036    0.00072
N1    3    0.251984    0.416687    0.446308    11.00000    0.05654    0.06439 =
         0.06562   -0.00647   -0.00019   -0.00977
C2    1    0.224314    0.416183    0.469811    11.00000    0.09359    0.13132 =
         0.07725    0.03695   -0.00973    0.00572
AFIX  43
H2A   2    0.210065    0.435597    0.441232    11.00000   -1.20000
AFIX   0
C3    1    0.214300    0.388894    0.534372    11.00000    0.08187    0.12341 =
         0.08742    0.03625    0.00810   -0.00466
AFIX  43
H3A   2    0.194341    0.391599    0.550453    11.00000   -1.20000
AFIX   0
C4    1    0.235149    0.357367    0.574180    11.00000    0.07641    0.08217 =
         0.04605   -0.00140   -0.00557   -0.00034
C5    1    0.263012    0.356345    0.548209    11.00000    0.08210    0.12738 =
         0.07552    0.03124    0.00294    0.01430
AFIX  43
H5A   2    0.277372    0.334747    0.572551    11.00000   -1.20000
AFIX   0
C6    1    0.271359    0.387127    0.484766    11.00000    0.05579    0.11733 =
         0.08765    0.03141   -0.00513    0.01394
AFIX  43
H6A   2    0.291451    0.386583    0.469286    11.00000   -1.20000
AFIX   0
C7    1    0.226665    0.324545    0.643303    11.00000    0.06975    0.07797 =
         0.03991   -0.00047    0.00817    0.00171
C8    1    0.246742    0.314196    0.700572    11.00000    0.10731    0.12170 =
         0.07603    0.02536   -0.00141   -0.02470
AFIX  43
H8A   2    0.266558    0.326124    0.695792    11.00000   -1.20000
AFIX   0
C9    1    0.238945    0.285535    0.768808    11.00000    0.12496    0.13448 =
         0.06519    0.03320   -0.02654   -0.03907
AFIX  43
H9A   2    0.253656    0.277369    0.806578    11.00000   -1.20000
AFIX   0
C10   1    0.209389    0.270170    0.777924    11.00000    0.08584    0.06347 =
         0.05138   -0.01095   -0.00243   -0.01756
C11   1    0.189699    0.279837    0.718444    11.00000    0.12303    0.05431 =
         0.08692    0.00977   -0.00383   -0.02839
AFIX  43
H11A  2    0.170040    0.266861    0.721594    11.00000   -1.20000
AFIX   0
C12   1    0.197331    0.307744    0.654008    11.00000    0.09275    0.09904 =
         0.07833    0.01706   -0.00198   -0.00881
AFIX  43
H12A  2    0.182479    0.315637    0.616474    11.00000   -1.20000
AFIX   0
N13   3    0.252031    0.414798    1.259321    11.00000    0.06922    0.07374 =
         0.06985   -0.00906   -0.01178   -0.01231
C14   1    0.269802    0.376189    1.232249    11.00000    0.09593    0.11004 =
         0.09224   -0.02386   -0.03008    0.00043
AFIX  43
H14A  2    0.288023    0.369614    1.258789    11.00000   -1.20000
AFIX   0
C15   1    0.262991    0.346354    1.169212    11.00000    0.11393    0.07354 =
         0.10175   -0.02972   -0.03315    0.01379
AFIX  43
H15A  2    0.276109    0.319781    1.153938    11.00000   -1.20000
AFIX   0
C16   1    0.236737    0.355425    1.128038    11.00000    0.13820    0.06774 =
         0.06135   -0.00772    0.00182   -0.02967
C17   1    0.219345    0.397010    1.152541    11.00000    0.09398    0.14929 =
         0.09749   -0.04109   -0.02668    0.01585
AFIX  43
H17A  2    0.201899    0.405940    1.124108    11.00000   -1.20000
AFIX   0
C18   1    0.227127    0.425675    1.218019    11.00000    0.09550    0.09850 =
         0.08800   -0.03582   -0.02338    0.01605
AFIX  43
H18A  2    0.214687    0.453156    1.233534    11.00000   -1.20000
AFIX   0
C19   1    0.228032    0.325841    1.056817    11.00000    0.11568    0.06952 =
         0.04970   -0.00711   -0.01406   -0.02117
C20   1    0.234978    0.272962    1.048869    11.00000    0.12471    0.08044 =
         0.05926   -0.00267   -0.01821   -0.00259
AFIX  43
H20A  2    0.245235    0.255652    1.089319    11.00000   -1.20000
AFIX   0
C21   1    0.227041    0.245746    0.982708    11.00000    0.11616    0.09093 =
         0.05666   -0.00971   -0.01162   -0.02205
AFIX  43
H21A  2    0.232641    0.210578    0.978614    11.00000   -1.20000
AFIX   0
C22   1    0.210820    0.269070    0.921217    11.00000    0.11293    0.05819 =
         0.04560   -0.00522    0.00486   -0.03086
PART   1
C23   1    0.205809    0.320008    0.928549    11.00000    0.23504    0.10455 =
         0.05600    0.00823   -0.04483   -0.04215
AFIX  43
H23A  2    0.196258    0.337881    0.887527    11.00000   -1.20000
AFIX   0
C24   1    0.214394    0.348384    0.996271    11.00000    0.26593    0.07991 =
         0.07566   -0.01887   -0.00826   -0.05025
AFIX  43
H24A  2    0.210290    0.384258    0.998291    11.00000   -1.20000
AFIX   0
PART   0
N25   3    0.123217    0.030702    1.252275    11.00000    0.09914    0.06029 =
         0.04851    0.00010    0.00743    0.00577
PART   1
C26   1    0.132501    0.079409    1.256613    10.50000    0.12054    0.09451 =
         0.06090   -0.01027    0.01459   -0.02864
AFIX  43
H26   2    0.131730    0.096168    1.304813    10.50000   -1.20000
AFIX   0
C27   1    0.143364    0.107601    1.194467    10.50000    0.12889    0.09016 =
         0.06449   -0.00227    0.01296   -0.02597
AFIX  43
H27   2    0.150133    0.141931    1.202008    10.50000   -1.20000
AFIX   0
PART   0
C28   1    0.144272    0.085557    1.121936    11.00000    0.09851    0.07350 =
         0.05390   -0.00548    0.00656   -0.00673
PART   1
C29   1    0.139432    0.031682    1.123068    10.50000    0.10028    0.06372 =
         0.04715   -0.01658    0.00707   -0.02385
AFIX  43
H29A  2    0.143564    0.012027    1.078725    10.50000   -1.20000
AFIX   0
C30   1    0.128858    0.006876    1.186919    10.50000    0.11485    0.06694 =
         0.04114   -0.01249    0.01719   -0.02936
AFIX  43
H30A  2    0.125435   -0.029195    1.183914    10.50000   -1.20000
AFIX   0
PART   2
C26'  1    0.112756    0.077866    1.237337    10.50000    0.10738    0.09119 =
         0.06872   -0.00211    0.03735    0.01189
AFIX  43
H26'  2    0.099019    0.093237    1.270947    10.50000   -1.20000
AFIX   0
C27'  1    0.122024    0.105390    1.171349    10.50000    0.11659    0.08684 =
         0.06879    0.00916    0.02763    0.01359
AFIX  43
H27'  2    0.113185    0.137789    1.159868    10.50000   -1.20000
AFIX   0
C29'  1    0.154162    0.035204    1.143337    10.50000    0.10459    0.07870 =
         0.06835   -0.00724    0.01786    0.01192
AFIX  43
H29'  2    0.168609    0.017789    1.114121    10.50000   -1.20000
AFIX   0
C30'  1    0.142627    0.012658    1.205931    10.50000    0.09041    0.08305 =
         0.05956   -0.00694    0.01676    0.00352
AFIX  43
H30'  2    0.149774   -0.020976    1.217304    10.50000   -1.20000
AFIX   0
PART   0
C31   1    0.153606    0.113785    1.053533    11.00000    0.10714    0.07609 =
         0.03698   -0.00254    0.01259   -0.02015
C32   1    0.169093    0.087368    0.992442    11.00000    0.28809    0.04951 =
         0.07062    0.00429    0.02988    0.02139
AFIX  43
H32A  2    0.172579    0.051324    0.995650    11.00000   -1.20000
AFIX   0
C33   1    0.179011    0.115748    0.927786    11.00000    0.15003    0.07259 =
         0.06498    0.00127    0.02859   -0.01638
AFIX  43
H33A  2    0.188513    0.097477    0.888085    11.00000   -1.20000
AFIX   0
C34   1    0.175443    0.169170    0.919917    11.00000    0.09747    0.06503 =
         0.03902   -0.01136    0.00701   -0.01497
C35   1    0.158854    0.194422    0.978874    11.00000    0.17566    0.04278 =
         0.07472    0.00701    0.01877   -0.00767
AFIX  43
H35A  2    0.154458    0.230029    0.973091    11.00000   -1.20000
AFIX   0
C36   1    0.148855    0.168861    1.044590    11.00000    0.16461    0.18823 =
         0.04284   -0.01162    0.02633   -0.00507
AFIX  43
H36A  2    0.138989    0.187670    1.083127    11.00000   -1.20000
AFIX   0
N37   3    0.124502    0.033145    0.437094    11.00000    0.07991    0.05171 =
         0.04119   -0.00939   -0.00464    0.00251
C38   1    0.106483    0.064495    0.477175    11.00000    0.05686    0.08308 =
         0.07734   -0.03012   -0.00487    0.01533
AFIX  43
H38A  2    0.086407    0.068128    0.460313    11.00000   -1.20000
AFIX   0
C39   1    0.115825    0.091329    0.541094    11.00000    0.09683    0.08798 =
         0.05985   -0.02084   -0.00830    0.02285
AFIX  43
H39A  2    0.102033    0.111807    0.568040    11.00000   -1.20000
AFIX   0
C40   1    0.145959    0.088758    0.567353    11.00000    0.08062    0.06851 =
         0.03986    0.00144   -0.00364    0.00295
C41   1    0.164755    0.057570    0.523694    11.00000    0.07100    0.07423 =
         0.04182   -0.00607   -0.00551    0.00016
AFIX  43
H41A  2    0.185241    0.054745    0.537060    11.00000   -1.20000
AFIX   0
C42   1    0.153072    0.030686    0.460343    11.00000    0.06536    0.06812 =
         0.05106   -0.00086    0.00634    0.00745
AFIX  43
H42A  2    0.166138    0.009492    0.432232    11.00000   -1.20000
AFIX   0
C43   1    0.156425    0.117549    0.638245    11.00000    0.08402    0.06165 =
         0.04190    0.00061    0.00320   -0.00688
C44   1    0.136619    0.129826    0.695354    11.00000    0.10356    0.09259 =
         0.06067   -0.00757    0.01234   -0.00819
AFIX  43
H44A  2    0.116237    0.121225    0.688459    11.00000   -1.20000
AFIX   0
C45   1    0.146018    0.154702    0.763189    11.00000    0.12840    0.11505 =
         0.06108   -0.03033    0.02634   -0.03114
AFIX  43
H45A  2    0.132014    0.162894    0.801205    11.00000   -1.20000
AFIX   0
C46   1    0.176676    0.167645    0.774854    11.00000    0.08734    0.06862 =
         0.04387   -0.00167   -0.00535   -0.02477
C47   1    0.196381    0.153178    0.720458    11.00000    0.09662    0.12186 =
         0.06250   -0.03185   -0.00984    0.01204
AFIX  43
H47A  2    0.216915    0.160208    0.728359    11.00000   -1.20000
AFIX   0
C48   1    0.186873    0.128126    0.653109    11.00000    0.07565    0.09818 =
         0.06300   -0.01177   -0.00833    0.00576
AFIX  43
H48A  2    0.201149    0.118063    0.616769    11.00000   -1.20000
AFIX   0
C49   1    0.201624    0.242355    0.848505    11.00000    0.09020    0.09321 =
         0.04002   -0.00974   -0.00621   -0.01262
C50   1    0.185444    0.195772    0.849434    11.00000    0.10286    0.06000 =
         0.04846   -0.01302    0.00644   -0.03563
C91   1    0.355426    0.473752    0.313010    11.00000    0.06862    0.07023 =
         0.06102   -0.01312    0.00210   -0.00402
C92   1    0.371918    0.456839    0.377982    11.00000    0.07617    0.07770 =
         0.05834   -0.01425    0.00684   -0.00746
AFIX  43
H92A  2    0.361727    0.443952    0.420981    11.00000   -1.20000
AFIX   0
C93   1    0.403454    0.458784    0.380073    11.00000    0.07173    0.08097 =
         0.05736   -0.00999    0.00457    0.00542
AFIX  43
H93A  2    0.414133    0.447510    0.424385    11.00000   -1.20000
AFIX   0
C94   1    0.419196    0.477745    0.315379    11.00000    0.07298    0.09926 =
         0.06865   -0.02822   -0.00083   -0.00545
C95   1    0.401694    0.495365    0.250984    11.00000    0.08055    0.10440 =
         0.06167    0.00929   -0.00247   -0.00078
AFIX  43
H95A  2    0.411437    0.508311    0.207325    11.00000   -1.20000
AFIX   0
C96   1    0.371189    0.493948    0.251010    11.00000    0.08563    0.10271 =
         0.06876    0.00834   -0.01694    0.01349
AFIX  43
H96A  2    0.360406    0.506970    0.207949    11.00000   -1.20000
AFIX   0
C97   1    0.452370    0.476795    0.314981    11.00000    0.07252    0.07123 =
         0.06537   -0.01001   -0.00383   -0.00374
C98   1    0.469252    0.487535    0.381678    11.00000    0.06895    0.12508 =
         0.06586   -0.01377    0.00047    0.00078
AFIX  43
H98A  2    0.459491    0.492944    0.428634    11.00000   -1.20000
AFIX   0
C99   1    0.501440    0.490443    0.379530    11.00000    0.08743    0.12643 =
         0.06027   -0.02728   -0.00941   -0.00657
AFIX  43
H99A  2    0.512308    0.499753    0.424554    11.00000   -1.20000
AFIX   0
C100  1    0.516756    0.479839    0.312663    11.00000    0.06599    0.09689 =
         0.07666   -0.00370   -0.01053   -0.01206
C101  1    0.499409    0.465124    0.246677    11.00000    0.09330    0.15456 =
         0.05439   -0.03112    0.01012   -0.01225
AFIX  43
H10A  2    0.508918    0.454325    0.201426    11.00000   -1.20000
AFIX   0
C102  1    0.468045    0.466747    0.249209    11.00000    0.06072    0.13553 =
         0.06244   -0.02236   -0.00146   -0.00426
AFIX  43
H10B  2    0.457077    0.460593    0.203146    11.00000   -1.20000
AFIX   0
C103  1    0.322243    0.474390    0.311687    11.00000    0.05827    0.07285 =
         0.08203   -0.02096   -0.00533   -0.00567
O5    4    0.308955    0.450370    0.368845    11.00000    0.08196    0.09127 =
         0.07326   -0.01653    0.00134   -0.00277
O6    4    0.307127    0.496059    0.260185    11.00000    0.07815    0.10908 =
         0.12792    0.02872   -0.01304   -0.01844
C104  1    0.549979    0.479265    0.308225    11.00000    0.07086    0.06828 =
         0.07664   -0.01057    0.00794   -0.00414
O7    4    0.564195    0.499128    0.368438    11.00000    0.08320    0.10880 =
         0.07747   -0.01407   -0.01954    0.01395
O8    4    0.563298    0.463267    0.251539    11.00000    0.07782    0.09580 =
         0.09027   -0.02012    0.00747    0.00869
ZN3   5    0.157416    0.810686    0.012443    11.00000    0.07074    0.08232 =
         0.04666   -0.00015    0.00464    0.00236
C105  1    0.205661    0.676260    0.052951    11.00000    0.09187    0.11971 =
         0.06948    0.00344   -0.00105    0.00135
C106  1    0.205528    0.649936   -0.017325    11.00000    0.13393    0.14105 =
         0.08896   -0.01513   -0.02605    0.03975
AFIX  43
H10C  2    0.195589    0.664527   -0.060582    11.00000   -1.20000
AFIX   0
C107  1    0.220340    0.601038   -0.024220    11.00000    0.18907    0.12554 =
         0.11016   -0.03254   -0.04906    0.05177
AFIX  43
H10D  2    0.217852    0.581674   -0.069990    11.00000   -1.20000
AFIX   0
C108  1    0.238358    0.581434    0.035260    11.00000    0.09889    0.08722 =
         0.09970    0.00324   -0.01982    0.01771
C109  1    0.238332    0.608436    0.105416    11.00000    0.10060    0.13256 =
         0.06872    0.01119   -0.00373    0.04286
AFIX  43
H10E  2    0.249273    0.594733    0.147740    11.00000   -1.20000
AFIX   0
C110  1    0.222617    0.655114    0.114946    11.00000    0.11609    0.10036 =
         0.06764    0.00134    0.00039    0.02860
AFIX  43
H11B  2    0.223381    0.672388    0.162826    11.00000   -1.20000
AFIX   0
C111  1    0.256619    0.533162    0.023326    11.00000    0.09553    0.12535 =
         0.08744    0.00891   -0.00051    0.03255
C112  1    0.270472    0.506852    0.084545    11.00000    0.12552    0.09184 =
         0.12260    0.01563    0.00532    0.01021
AFIX  43
H11C  2    0.267589    0.518312    0.135433    11.00000   -1.20000
AFIX   0
C113  1    0.288267    0.464429    0.071467    11.00000    0.12122    0.11565 =
         0.15855    0.01265   -0.00499    0.06192
AFIX  43
H11D  2    0.297549    0.447894    0.114107    11.00000   -1.20000
AFIX   0
C114  1    0.293165    0.444995   -0.000706    11.00000    0.11186    0.10382 =
         0.19789    0.00999    0.04234    0.04758
C115  1    0.277495    0.468366   -0.060517    11.00000    0.24134    0.19777 =
         0.14250   -0.04668    0.04002    0.07558
AFIX  43
H11E  2    0.279741    0.455570   -0.110950    11.00000   -1.20000
AFIX   0
C116  1    0.258982    0.509126   -0.049050    11.00000    0.16603    0.21885 =
         0.14769   -0.03509   -0.03853    0.11021
AFIX  43
H11F  2    0.247321    0.521782   -0.090845    11.00000   -1.20000
AFIX   0
C117  1    0.188413    0.728048    0.058453    11.00000    0.09688    0.07242 =
         0.08485   -0.01221    0.01556    0.01255
O9    4    0.173159    0.739977    0.004546    11.00000    0.11233    0.10557 =
         0.06735   -0.00269   -0.02336    0.01640
O10   4    0.193668    0.753708    0.121856    11.00000    0.11154    0.12866 =
         0.10884   -0.01833   -0.01590    0.04903
C118  1    0.312075    0.399738   -0.014616    11.00000    0.13811    0.13156 =
         0.25125   -0.00242    0.07525    0.01751
O11   4    0.318624    0.365814    0.023326    11.00000    0.23742    0.05218 =
         0.33510    0.01604   -0.02483    0.03110
O12   4    0.323984    0.394821   -0.080955    11.00000    0.35627    0.32066 =
         0.42834    0.03193    0.19744    0.19357
N51   3    0.126635    0.808323    0.100468    11.00000    0.05745    0.08869 =
         0.05300   -0.00438    0.00928   -0.01337
C52   1    0.119720    0.763526    0.132603    11.00000    0.09254    0.06768 =
         0.07278   -0.00638    0.02519   -0.00715
AFIX  43
H52A  2    0.128169    0.732969    0.112526    11.00000   -1.20000
AFIX   0
C53   1    0.100706    0.759113    0.194247    11.00000    0.09527    0.07346 =
         0.07500    0.00146    0.02127   -0.01485
AFIX  43
H53A  2    0.096506    0.726248    0.215357    11.00000   -1.20000
AFIX   0
C54   1    0.087617    0.804420    0.225319    11.00000    0.06692    0.07876 =
         0.04712   -0.01055   -0.00008    0.00434
C55   1    0.095044    0.852578    0.189913    11.00000    0.07111    0.08011 =
         0.05692   -0.00869    0.00406    0.00442
AFIX  43
H55A  2    0.087077    0.884079    0.208057    11.00000   -1.20000
AFIX   0
C56   1    0.113984    0.852005    0.129046    11.00000    0.06643    0.04759 =
         0.07312   -0.00490    0.00684    0.00126
AFIX  43
H56A  2    0.118541    0.883936    0.105461    11.00000   -1.20000
AFIX   0
C57   1    0.068694    0.801974    0.295083    11.00000    0.05745    0.08306 =
         0.05229   -0.00217    0.00021   -0.01221
C58   1    0.073854    0.765231    0.350262    11.00000    0.07971    0.13789 =
         0.04826    0.00162    0.00467    0.01208
AFIX  43
H58A  2    0.089194    0.740597    0.343697    11.00000   -1.20000
AFIX   0
C59   1    0.056457    0.763711    0.417110    11.00000    0.08037    0.13736 =
         0.04643    0.01228    0.00301    0.03188
AFIX  43
H59A  2    0.060506    0.738335    0.455051    11.00000   -1.20000
AFIX   0
C60   1    0.033683    0.798706    0.427728    11.00000    0.07371    0.09645 =
         0.03922    0.00722   -0.00293    0.00703
C61   1    0.029205    0.837452    0.372801    11.00000    0.08231    0.09171 =
         0.06106   -0.00226    0.00764    0.00008
AFIX  43
H61A  2    0.014529    0.863036    0.381050    11.00000   -1.20000
AFIX   0
C62   1    0.045900    0.839358    0.305845    11.00000    0.07130    0.08413 =
         0.04831    0.00132   -0.00147   -0.00171
AFIX  43
H62A  2    0.042077    0.865119    0.268337    11.00000   -1.20000
AFIX   0
N63   3    0.127986    0.808947    0.913571    11.00000    0.09528    0.07984 =
         0.06013    0.00395   -0.01763   -0.01051
C64   1    0.114889    0.765326    0.892525    11.00000    0.16764    0.09477 =
         0.09157    0.02918   -0.05748   -0.02626
AFIX  43
H64A  2    0.120024    0.734825    0.919757    11.00000   -1.20000
AFIX   0
C65   1    0.093718    0.761463    0.831931    11.00000    0.21692    0.12612 =
         0.08088    0.04619   -0.05742   -0.08581
AFIX  43
H65A  2    0.082048    0.731176    0.826039    11.00000   -1.20000
AFIX   0
C66   1    0.090082    0.802309    0.780971    11.00000    0.08982    0.08287 =
         0.06155    0.01563   -0.00924   -0.01367
C67   1    0.106695    0.846752    0.800140    11.00000    0.19902    0.06769 =
         0.07176    0.01202   -0.04788   -0.01961
AFIX  43
H67A  2    0.105040    0.876382    0.768450    11.00000   -1.20000
AFIX   0
C68   1    0.125250    0.848197    0.863692    11.00000    0.20665    0.07034 =
         0.09065    0.03043   -0.06638   -0.02278
AFIX  43
H68A  2    0.136687    0.878424    0.872750    11.00000   -1.20000
AFIX   0
C69   1    0.071947    0.798235    0.708769    11.00000    0.06295    0.08277 =
         0.06187    0.01639   -0.00262   -0.00236
C70   1    0.077341    0.830131    0.645705    11.00000    0.08139    0.10624 =
         0.07705    0.01076   -0.00633   -0.01422
AFIX  43
H70A  2    0.093083    0.854451    0.648844    11.00000   -1.20000
AFIX   0
C71   1    0.059864    0.826963    0.577347    11.00000    0.08637    0.14038 =
         0.05371    0.03107    0.00269    0.00870
AFIX  43
H71A  2    0.065171    0.846960    0.534239    11.00000   -1.20000
AFIX   0
C72   1    0.034595    0.794371    0.572488    11.00000    0.06375    0.09007 =
         0.05171    0.00145    0.01079   -0.01410
C73   1    0.029867    0.761296    0.634928    11.00000    0.08081    0.09388 =
         0.06358   -0.00021    0.00106   -0.01546
AFIX  43
H73A  2    0.014360    0.736534    0.631572    11.00000   -1.20000
AFIX   0
C74   1    0.047451    0.763965    0.701914    11.00000    0.07725    0.09602 =
         0.06353    0.01636    0.00366    0.01540
AFIX  43
H74A  2    0.042857    0.742284    0.743799    11.00000   -1.20000
AFIX   0
C75   1    0.015236    0.796007    0.500286    11.00000    0.07497    0.07992 =
         0.04189    0.00036    0.00939   -0.00645
C77   1    0.225695    0.603650    0.383727    11.00000    0.09335    0.06366 =
         0.06454   -0.00095   -0.00298    0.00852
C78   1    0.227427    0.635482    0.445039    11.00000    0.13340    0.09240 =
         0.08223    0.00052   -0.02410    0.05735
AFIX  43
H78A  2    0.239411    0.626419    0.488297    11.00000   -1.20000
AFIX   0
C79   1    0.210894    0.683492    0.444350    11.00000    0.14286    0.06315 =
         0.07011   -0.01467   -0.02049    0.02528
AFIX  43
H79A  2    0.211750    0.705178    0.488091    11.00000   -1.20000
AFIX   0
C80   1    0.194157    0.698120    0.382222    11.00000    0.10718    0.05898 =
         0.06416   -0.00772   -0.01203    0.02745
C81   1    0.194085    0.665668    0.317063    11.00000    0.10800    0.09926 =
         0.06826   -0.00405   -0.01649    0.04338
AFIX  43
H81A  2    0.183725    0.675746    0.271632    11.00000   -1.20000
AFIX   0
C82   1    0.209232    0.619049    0.319920    11.00000    0.12358    0.09734 =
         0.07695   -0.02267   -0.01122    0.02135
AFIX  43
H82A  2    0.208273    0.596958    0.276637    11.00000   -1.20000
AFIX   0
C83   1    0.176595    0.747892    0.383110    11.00000    0.08831    0.07703 =
         0.06526   -0.00900   -0.00997    0.00320
C84   1    0.163615    0.767468    0.449847    11.00000    0.12538    0.07704 =
         0.06516    0.00761    0.00431    0.04269
AFIX  43
H84A  2    0.165552    0.748276    0.495924    11.00000   -1.20000
AFIX   0
C85   1    0.148219    0.813406    0.450751    11.00000    0.13397    0.08823 =
         0.05411    0.00083    0.01248    0.01987
AFIX  43
H85A  2    0.139380    0.824112    0.496966    11.00000   -1.20000
AFIX   0
C86   1    0.145202    0.844331    0.387004    11.00000    0.06589    0.06009 =
         0.06552   -0.00851   -0.00501   -0.00421
C87   1    0.159222    0.828783    0.319471    11.00000    0.08370    0.10167 =
         0.04876   -0.00642   -0.02182    0.00788
AFIX  43
H87A  2    0.158325    0.850505    0.275773    11.00000   -1.20000
AFIX   0
C88   1    0.174600    0.781362    0.315742    11.00000    0.07646    0.05899 =
         0.06222   -0.00984   -0.00850    0.02074
AFIX  43
H88A  2    0.183643    0.771203    0.269526    11.00000   -1.20000
AFIX   0
C89   1    0.242025    0.551649    0.385409    11.00000    0.08117    0.07940 =
         0.07261    0.01753    0.01465    0.01584
O1    4    0.236736    0.519102    0.331175    11.00000    0.12253    0.08521 =
         0.08224   -0.01197    0.00750    0.00380
O2    4    0.261523    0.543357    0.436041    11.00000    0.08631    0.06594 =
         0.11240    0.00606   -0.00983    0.02132
C90   1    0.127341    0.894978    0.390149    11.00000    0.07521    0.07923 =
         0.05296   -0.01276   -0.00701    0.00108
O3    4    0.130980    0.925439    0.331594    11.00000    0.08132    0.06545 =
         0.06729   -0.00035   -0.00777    0.00204
O4    4    0.112933    0.907147    0.445608    11.00000    0.13586    0.07225 =
         0.08421   -0.00524    0.01138    0.03329

HKLF 4

REM  wpl1_119 in C2
REM R1 =  0.0598 for   21842 Fo > 4sig(Fo)  and  0.0688 for all   26709 data
REM   1226 parameters refined using    138 restraints

END

WGHT      0.0969      0.0000

REM Highest difference peak  0.660,  deepest hole -0.557,  1-sigma level  0.056
Q1    1   0.2668  0.4628  0.2914  11.00000  0.05    0.66
Q2    1   0.1101  0.9922  0.2828  11.00000  0.05    0.63
Q3    1   0.1601  0.8010 -0.0444  11.00000  0.05    0.61
Q4    1   0.1074  0.9908  0.4036  11.00000  0.05    0.58
Q5    1   0.2649  0.4617  0.4161  11.00000  0.05    0.51
Q6    1   0.1573  0.8091  0.0743  11.00000  0.05    0.44
Q7    1   0.1279  0.9718  0.3449  11.00000  0.05    0.39
Q8    1   0.1507  0.7716  0.0128  11.00000  0.05    0.39
Q9    1   0.2876  0.4860  0.3620  11.00000  0.05    0.35
Q10   1   0.2507  0.4279  0.3798  11.00000  0.05    0.35
;
_shelx_res_checksum   74757

_shelx_hkl_file
;
  -4   0   0   41.00    3.40
   6   0   0   81.59    6.70
   6   0   0   83.99    6.30
  -6   0   0   82.39    7.00
  -6   0   0   75.29    6.30
  -8   0   0 1864.81  118.39
  -8   0   0 1650.93  117.59
   8   0   0 1792.12  117.59
   8   0   0 1770.72  118.19
 -10   0   0  418.86   29.90
  10   0   0  436.36   29.70
  10   0   0  433.56   30.50
 -10   0   0  440.96   30.90
 -12   0   0   87.09    9.50
  12   0   0   97.59    9.20
  12   0   0   96.59    8.10
 -12   0   0   94.19    8.50
  14   0   0  160.38   13.60
 -14   0   0  149.59   13.80
  14   0   0  166.58   12.50
 -14   0   0  163.18   12.90
  16   0   0   15.70    3.90
  16   0   0    6.60    3.90
 -16   0   0   11.80    4.20
 -16   0   0    7.80    4.60
 -18   0   0  131.99   12.20
  18   0   0  133.59   12.90
  18   0   0  148.79   11.80
 -18   0   0  134.89   13.50
 -20   0   0   73.39   10.00
  20   0   0   87.49    6.40
  20   0   0  104.29    9.60
 -20   0   0  102.99   11.80
  20   0   0  101.99   10.90
 -22   0   0   18.80    6.90
  22   0   0   15.00    4.70
  22   0   0   12.60    1.70
  22   0   0   14.40    5.60
 -22   0   0   13.20    5.30
  22   0   0   11.90    2.00
  24   0   0  203.38   13.90
 -24   0   0  205.98   18.00
  24   0   0  209.88   16.90
  24   0   0  211.88   14.00
 -24   0   0  209.88   19.40
  24   0   0  226.58   18.80
 -24   0   0  201.28   13.90
 -26   0   0  272.17   23.80
  26   0   0  293.07   19.90
  26   0   0  333.47   23.50
  26   0   0  344.67   25.30
 -26   0   0  279.27   19.90
  26   0   0  294.57   20.00
 -26   0   0  315.27   26.10
 -28   0   0   64.49   10.60
  28   0   0   78.69    9.60
 -28   0   0   66.99   12.10
  28   0   0   86.09   10.90
  28   0   0   64.39    4.80
 -28   0   0   63.79    4.80
  28   0   0   63.89    5.00
  30   0   0   40.50    8.70
  30   0   0   46.50    8.80
 -30   0   0   42.40    3.60
  30   0   0   48.80    3.60
 -30   0   0   41.90   11.00
 -30   0   0   41.00    9.60
  30   0   0   43.60    3.80
  32   0   0    6.10    1.70
  32   0   0    4.80    5.70
 -32   0   0    1.90    6.90
 -32   0   0    8.90    7.40
 -32   0   0   10.40    2.10
  32   0   0    3.80    5.50
  32   0   0    6.30    2.00
  34   0   0    4.30    5.90
 -34   0   0    3.00    2.20
 -34   0   0    2.60    7.50
  34   0   0    1.40    2.00
  34   0   0    2.80    1.80
 -36   0   0   21.00    2.70
 -36   0   0   12.40    8.10
  36   0   0   20.70    2.60
  36   0   0   16.10    7.40
  36   0   0   18.00    2.70
 -38   0   0   27.80   10.10
  38   0   0   50.69    3.90
  38   0   0   43.20    4.00
  38   0   0   37.80    9.60
 -38   0   0   46.90    4.10
  40   0   0    1.90    2.00
  40   0   0    2.60    2.20
 -40   0   0    3.10    2.50
  42   0   0    1.00    2.30
 -42   0   0    5.80    2.80
  42   0   0    2.20    2.10
  44   0   0    2.80    2.40
  44   0   0    4.10    2.30
  46   0   0    1.90    2.30
  46   0   0    5.70    2.50
  48   0   0    0.90    2.40
  -3  -1   0  816.12   54.49
  -3   1   0  822.72   54.89
  -5  -1   0  172.68   11.10
   5  -1   0  160.88   11.60
  -5  -1   0  163.18   11.30
   5   1   0  153.98   11.00
  -5   1   0  138.79   11.50
  -5   1   0  138.99   10.90
   5   1   0  155.98   11.10
  -7  -1   0  196.28   14.30
  -7  -1   0  215.58   14.00
   7  -1   0  167.38   14.50
   7  -1   0  176.78   13.70
  -7   1   0  192.58   14.80
   7   1   0  220.28   14.30
   9  -1   0  151.58   13.60
  -9  -1   0  147.69   13.40
   9  -1   0  165.38   12.50
  -9  -1   0  174.18   13.00
  -9   1   0  196.48   13.00
   9   1   0  183.98   12.90
   9   1   0  175.98   13.30
  -9   1   0  191.28   14.20
  11  -1   0   72.19    7.80
  11  -1   0   75.39    6.70
 -11  -1   0   60.89    7.60
 -11  -1   0   58.99    6.80
  11   1   0   70.59    6.80
 -11   1   0   92.09    8.80
  11   1   0   72.39    7.50
 -11   1   0   81.59    7.20
 -13  -1   0   54.19    7.00
  13  -1   0   50.39    7.10
  13  -1   0   58.69    5.90
 -13  -1   0   59.19    6.50
 -13   1   0   54.79    6.40
  13   1   0   49.40    6.50
 -13   1   0   42.90    7.50
  13   1   0   55.99    6.20
  15  -1   0  216.18   17.30
  15  -1   0  229.78   15.90
 -15  -1   0  213.18   16.20
 -15  -1   0  230.38   17.50
 -15   1   0  193.48   16.10
  15   1   0  207.08   16.70
  15   1   0  197.78   15.90
 -15   1   0  194.58   17.50
 -17  -1   0  355.56   28.20
  17  -1   0  410.66   29.60
  17  -1   0  410.36   27.80
 -17  -1   0  386.06   29.40
  17   1   0  372.36   28.90
 -17   1   0  378.56   28.30
 -17   1   0  427.76   30.20
  17   1   0  399.96   28.30
  19  -1   0   49.50    6.40
  19  -1   0   48.30    7.80
  19  -1   0   47.40    3.40
 -19  -1   0   39.30    6.90
 -19  -1   0   42.20    8.10
 -19   1   0   40.50    6.90
  19   1   0   37.40    6.50
  19   1   0   37.90    3.70
  19   1   0   35.70    6.90
 -19   1   0   46.20    8.70
  21  -1   0  141.99   13.80
  21  -1   0  119.69    9.30
 -21  -1   0  182.48   15.00
  21  -1   0  126.99    9.50
 -21  -1   0  172.18   13.60
  21  -1   0  127.99   12.00
 -21   1   0  128.99   13.20
  21   1   0  189.28   14.60
 -21   1   0  151.48   15.10
  23  -1   0  188.78   15.90
  23  -1   0  194.48   13.00
  23  -1   0  185.48   17.40
  23  -1   0  177.98   12.90
 -23  -1   0  171.88   16.60
 -23  -1   0  188.18   17.80
  23   1   0  215.48   17.20
  23   1   0  198.28   13.00
  23   1   0  199.68   13.00
  23   1   0  204.48   16.30
 -23   1   0  212.98   19.10
 -23   1   0  193.98   16.90
  25  -1   0   58.69    5.00
 -25  -1   0   71.59   11.30
  25  -1   0   60.79    8.70
 -25  -1   0   76.59    4.90
 -25  -1   0   75.79   10.20
  25  -1   0   60.79   10.00
 -25   1   0   68.99    9.90
  25   1   0   72.49    4.90
 -25   1   0   66.79   11.20
 -25   1   0   57.59    4.90
  25   1   0   80.49   10.10
  25   1   0   78.19    9.30
  25   1   0   73.29    5.00
  27  -1   0   23.70    2.20
  27  -1   0   27.90    6.50
  27  -1   0   26.40    2.50
 -27  -1   0   18.90    2.30
 -27  -1   0   11.10    6.20
 -27  -1   0   15.00    7.50
  27  -1   0   21.20    6.90
  27   1   0   15.20    2.50
  27   1   0   14.80    2.20
  27   1   0   14.90    6.30
 -27   1   0   25.00    7.50
  27   1   0   20.70    6.90
 -27   1   0   23.60    8.00
  29  -1   0   21.20    2.90
  29  -1   0   21.90    2.60
 -29  -1   0   33.80    9.40
 -29  -1   0   27.80    8.00
  29  -1   0   30.00    8.30
  29  -1   0   22.30    6.80
 -29  -1   0   33.90    2.70
  29   1   0   31.80    2.70
 -29   1   0   21.30    8.60
  29   1   0   32.60    3.00
 -29   1   0   23.10    8.10
  29   1   0   34.70    7.90
 -29   1   0   22.80    2.80
  29   1   0   43.40    8.90
  31  -1   0   35.90    3.10
 -31  -1   0   24.10    8.50
 -31  -1   0   31.20    9.80
  31  -1   0   34.40    3.30
  31  -1   0   46.20    9.60
 -31  -1   0   32.30    3.10
  31  -1   0   31.40    7.70
 -31   1   0   42.90   10.80
 -31   1   0   36.10    3.10
  31   1   0   46.10    9.20
  31   1   0   35.90    3.40
  31   1   0   38.20    3.20
  31   1   0   43.60    8.80
 -31   1   0   28.10    8.30
  33  -1   0    0.90    5.40
  33  -1   0    2.40    1.70
 -33  -1   0   -0.40    7.00
  33  -1   0    3.60    1.90
 -33  -1   0    5.30    7.10
 -33  -1   0    3.60    2.20
  33   1   0    3.20    1.80
  33   1   0    3.70    2.10
 -33   1   0   14.80   11.80
 -33   1   0    9.20    7.30
  33   1   0    1.00    5.70
  33   1   0    2.50    5.30
 -33   1   0    9.10    2.30
  35  -1   0   22.20    2.50
 -35  -1   0    6.80    7.70
  35  -1   0   17.30    2.70
 -35  -1   0   13.50    2.60
  35  -1   0   23.80    7.40
  35   1   0   14.90    2.50
 -35   1   0   20.30    2.70
  35   1   0   16.30    2.60
 -35   1   0   13.40    8.30
  35   1   0   14.00    7.20
 -37  -1   0    2.00    2.40
 -37  -1   0    5.40    8.60
  37  -1   0    2.20    6.70
  37  -1   0    3.80    1.90
  37  -1   0    5.60    2.20
  37   1   0    1.30    2.10
  37   1   0    5.70    6.40
 -37   1   0    6.30    2.30
  37   1   0    1.90    1.90
 -37   1   0   10.60    8.00
  39  -1   0   18.60    2.90
  39  -1   0   17.60    2.60
 -39  -1   0   18.90    2.90
  39   1   0   17.60    2.70
 -39   1   0   24.00    3.00
  39   1   0   16.30    2.90
  41  -1   0   13.60    2.40
 -41  -1   0   11.40    2.80
  41  -1   0    9.70    2.50
  41   1   0   12.50    2.60
  41   1   0   13.90    2.40
  43  -1   0    1.00    2.30
  43  -1   0    1.80    2.20
 -43  -1   0    3.80    2.70
  43   1   0   -0.10    2.10
  43   1   0    2.00    2.50
  45  -1   0   -0.90    2.10
  45  -1   0   -2.00    2.20
  45   1   0   -1.30    2.40
  45   1   0    0.90    2.40
  47  -1   0   12.30    2.70
  47   1   0   12.50    2.90
  47   1   0   11.50    3.90
   0   2   0  877.81   58.59
  -2  -2   0   23.70    2.50
  -2   2   0   28.30    3.20
   2   2   0   18.60    2.50
  -4  -2   0   32.90    3.50
  -4  -2   0   32.40    3.90
  -4  -2   0   40.70    3.60
  -4   2   0   36.00    3.50
   4   2   0   36.00    3.60
   6  -2   0 3000.60  188.88
  -6  -2   0 3111.79  188.28
  -6   2   0 2839.82  188.88
  -6   2   0 2462.15  187.68
   6   2   0 2781.42  188.28
   8  -2   0 5000.90  326.37
   8  -2   0 4942.41  327.57
  -8   2   0 4628.64  326.37
  -8   2   0 5178.68  327.77
  10  -2   0  622.64   42.40
 -10  -2   0  607.24   43.20
 -10  -2   0  590.24   42.90
  10  -2   0  638.84   43.80
  10   2   0  648.34   43.00
 -10   2   0  642.14   42.70
 -10   2   0  686.43   44.30
  10   2   0  592.84   43.10
  12  -2   0   79.59    8.70
  12  -2   0   85.59    7.20
 -12  -2   0   77.79    8.20
 -12  -2   0   77.89    7.80
 -12   2   0   82.49    9.60
  12   2   0   77.69    7.90
  12   2   0   72.99    7.50
 -12   2   0   81.29    7.70
  14  -2   0   44.80    7.10
 -14  -2   0   39.40    6.30
 -14  -2   0   44.80    5.80
 -14   2   0   30.60    5.60
  14   2   0   29.70    5.60
 -14   2   0   28.10    6.60
  14   2   0   28.40    5.10
 -16  -2   0  181.18   14.50
  16  -2   0  182.08   15.40
  16  -2   0  190.28   13.60
 -16  -2   0  178.18   15.20
  16   2   0  162.48   14.50
 -16   2   0  176.38   14.50
 -16   2   0  173.68   15.80
  16   2   0  163.88   13.90
  18  -2   0   94.49   10.70
 -18  -2   0   83.59    9.70
  18  -2   0   94.79    6.60
  18  -2   0  102.79    9.00
 -18  -2   0   87.89   10.20
  18   2   0   99.09    9.60
 -18   2   0   98.99   10.10
 -18   2   0   92.69   11.20
  18   2   0   93.99    9.80
 -20  -2   0  136.49   12.30
 -20  -2   0  133.29    8.50
  20  -2   0  103.69   10.90
  20  -2   0  103.69   12.80
  20   2   0  148.49   12.00
 -20   2   0   86.19   11.70
  20   2   0  130.99    8.50
  20   2   0  139.09   12.50
 -20   2   0  111.19   13.70
 -22  -2   0   56.79    9.20
  22  -2   0   56.49    3.60
 -22  -2   0   48.60    3.60
  22  -2   0   59.09    9.00
 -22  -2   0   45.10    7.90
 -22   2   0   61.59    8.50
  22   2   0   37.60    7.40
 -22   2   0   59.49   10.40
  22   2   0   38.60    3.80
  22   2   0   43.50    7.80
 -24  -2   0   84.69    6.50
 -24  -2   0   98.29   12.30
  24  -2   0  102.29    6.60
  24  -2   0  119.69   10.40
 -24  -2   0   86.99   11.10
  24  -2   0  103.59   11.80
  24  -2   0   92.89    6.50
  24   2   0  106.19   11.30
  24   2   0   87.39    6.60
 -24   2   0  100.49   13.30
 -24   2   0   96.49   11.00
  24   2   0   98.49   10.70
  24   2   0   91.69    6.60
  26  -2   0   36.30    8.40
 -26  -2   0   32.60    7.60
  26  -2   0   27.00    6.30
  26  -2   0   30.70    2.90
  26  -2   0   20.80    2.60
 -26  -2   0   53.69    9.70
 -26   2   0   21.90    6.90
 -26   2   0   23.00    8.30
 -26   2   0   30.00    2.60
  26   2   0   49.70    8.10
  26   2   0   50.79    8.10
  28  -2   0   41.50    3.70
  28  -2   0   42.20    7.70
 -28  -2   0   58.29   10.00
 -28  -2   0   55.39   10.90
  28  -2   0   45.50    4.00
  28  -2   0   51.09    9.70
 -28  -2   0   57.79    3.90
  28   2   0   60.99    9.00
  28   2   0   52.89    3.90
  28   2   0   50.19    9.10
 -28   2   0   43.20   10.80
  28   2   0   55.09    4.00
 -28   2   0   37.20    8.80
 -28   2   0   44.90    3.80
 -30  -2   0   34.20    9.70
  30  -2   0   47.40    8.60
  30  -2   0   42.10    3.20
 -30  -2   0   32.80    8.60
  30  -2   0   49.80    9.90
  30  -2   0   40.20    3.30
 -30  -2   0   39.00    3.30
  30   2   0   32.10    3.20
 -30   2   0   29.40    8.40
  30   2   0   38.00    8.30
  30   2   0   37.00    8.40
  30   2   0   33.00    3.50
 -30   2   0   36.70   10.70
 -30   2   0   37.30    3.30
  32  -2   0   51.09    4.30
 -32  -2   0   40.70    9.70
 -32  -2   0   41.70   10.90
  32  -2   0   55.99    4.20
  32  -2   0   50.89   10.90
 -32  -2   0   47.50    4.20
  32  -2   0   62.49   10.00
 -32   2   0   50.69   12.10
  32   2   0   54.99    4.40
  32   2   0   57.59    4.20
  32   2   0   67.79   10.40
 -32   2   0   59.59   11.20
  32   2   0   65.79   10.40
 -32   2   0   56.19    4.20
  34  -2   0    6.80    2.20
 -34  -2   0    3.90    2.10
  34  -2   0    4.30    6.00
  34  -2   0    9.90    1.90
 -34  -2   0    6.20    7.30
 -34  -2   0    3.30    7.70
  34   2   0    7.20    2.00
 -34   2   0   10.90    8.10
  34   2   0    4.70    6.10
 -34   2   0    6.80    2.20
  34   2   0    3.70    2.20
  34   2   0    1.90    6.70
 -36  -2   0   11.30    8.40
 -36  -2   0    7.70    2.50
  36  -2   0    6.00    2.20
  36  -2   0    9.80    2.10
  36  -2   0    5.60    6.30
  36   2   0    6.00    2.00
 -36   2   0    6.20    8.60
  36   2   0    2.10    6.50
  36   2   0    4.40    2.20
 -36   2   0    9.10    2.30
  38  -2   0   23.40    2.70
 -38  -2   0   19.10    3.00
  38  -2   0   19.10    2.80
  38   2   0   17.90    3.00
 -38   2   0   21.60    3.80
  38   2   0   23.70    2.80
  40  -2   0    1.20    2.20
  40  -2   0    1.80    2.00
 -40  -2   0    0.90    2.60
  40   2   0    1.40    2.20
  40   2   0    0.90    1.90
  42  -2   0   -0.50    2.20
 -42  -2   0    4.10    2.50
  42  -2   0    1.30    2.00
  42   2   0    0.60    2.30
  42   2   0   -2.40    2.10
  44  -2   0    4.00    2.40
 -44  -2   0    7.80    2.90
  44   2   0   11.40    2.70
  44   2   0    7.30    2.40
 -46  -2   0    5.70    3.00
  46  -2   0    4.60    2.40
  46   2   0    4.00    2.50
  46   2   0    6.20    2.60
  48  -2   0    8.80    2.60
 -48   2   0    6.30    2.90
  48   2   0    6.10    2.70
   1  -3   0   81.59    5.80
   1  -3   0   94.09    7.00
  -1  -3   0   64.09    6.00
  -1   3   0   94.89    7.10
   1   3   0   63.49    6.40
   1   3   0   72.79    6.00
  -3  -3   0    5.60    2.10
  -3  -3   0    7.10    2.60
   3   3   0    5.90    2.30
   3   3   0    9.90    2.40
  -5  -3   0  100.49    8.00
   5  -3   0   82.89    8.80
  -5  -3   0   90.49    8.30
   5   3   0  114.69    8.20
  -5   3   0  100.29    9.30
   5   3   0  106.89    8.40
   7  -3   0 4945.60  342.37
   7  -3   0 5385.06  343.97
  -7  -3   0 5199.18  343.27
  -7   3   0 5191.18  342.57
  -7   3   0 5187.08  343.77
   9  -3   0 7595.44  513.85
   9  -3   0 7994.60  515.45
  -9   3   0 8252.57  515.65
  -9   3   0 7278.67  513.95
 -11  -3   0  401.26   28.80
  11  -3   0  430.76   30.30
 -11  -3   0  425.56   29.00
  11  -3   0  371.36   28.00
  11   3   0  405.06   29.00
 -11   3   0  368.96   28.40
 -11   3   0  456.15   30.50
  11   3   0  427.36   28.90
  13  -3   0  139.89   10.90
  13  -3   0  134.29   12.80
 -13  -3   0  133.59   11.90
 -13  -3   0  132.19   11.70
 -13   3   0  158.98   13.70
  13   3   0  155.98   12.20
  13   3   0  138.19   11.80
 -13   3   0  141.19   11.60
 -15  -3   0    8.00    4.00
 -15  -3   0    9.90    4.00
  15  -3   0    5.80    3.10
  15  -3   0   10.10    4.70
  15   3   0    7.90    3.70
 -15   3   0    6.60    5.00
  15   3   0    4.90    3.60
 -15   3   0    5.70    3.90
 -17  -3   0  474.25   32.50
 -17  -3   0  423.46   31.40
  17  -3   0  446.96   33.00
  17  -3   0  423.46   29.10
  17  -3   0  444.46   30.70
 -17   3   0  409.36   31.30
  17   3   0  459.75   32.00
 -17   3   0  438.46   33.50
  17   3   0  443.16   31.60
 -19  -3   0  163.88   10.40
 -19  -3   0  179.88   14.80
  19  -3   0  150.08   10.50
  19  -3   0  148.89   12.50
  19  -3   0  158.78   14.80
  19  -3   0  130.59   10.60
 -19  -3   0  170.98   14.00
 -19   3   0  140.79   13.50
  19   3   0  177.28   14.30
  19   3   0  157.68   13.60
 -19   3   0  155.88   15.80
 -21  -3   0  227.78   19.70
  21  -3   0  248.88   17.70
 -21  -3   0  208.98   15.20
  21  -3   0  258.67   20.20
 -21  -3   0  204.38   18.60
  21  -3   0  221.68   15.20
  21  -3   0  251.97   15.30
 -21   3   0  235.88   18.70
 -21   3   0  252.17   21.20
  21   3   0  208.08   15.30
  21   3   0  241.38   19.10
  21   3   0  213.38   18.60
  23  -3   0   36.90    8.50
  23  -3   0   37.50    3.00
 -23  -3   0   42.80    3.10
  23  -3   0   43.00    6.60
 -23  -3   0   49.90    8.30
 -23  -3   0   40.50    8.70
  23  -3   0   43.70    3.20
  23   3   0   33.10    7.10
  23   3   0   32.40    3.20
  23   3   0   33.00    3.20
 -23   3   0   42.80    8.30
  23   3   0   40.50    7.40
 -23   3   0   33.20    8.70
 -25  -3   0   12.80    6.40
 -25  -3   0   17.60    6.20
  25  -3   0   24.00    5.40
  25  -3   0   15.60    2.00
  25  -3   0   21.00    2.30
  25  -3   0   22.80    7.40
 -25   3   0   24.00    7.10
  25   3   0   28.70    6.70
  25   3   0   22.80    2.50
  25   3   0   15.20    2.20
 -25   3   0   23.60    8.20
  25   3   0   25.30    6.70
 -27  -3   0   20.70    8.10
  27  -3   0   27.20    7.80
  27  -3   0   23.60    2.30
 -27  -3   0   21.40    2.40
 -27  -3   0   15.00    6.80
  27  -3   0   28.80    6.60
  27  -3   0   24.40    2.60
  27   3   0   36.70    8.30
 -27   3   0   26.20    8.80
  27   3   0   21.10    2.60
  27   3   0   18.00    2.50
 -27   3   0   29.80    8.00
  27   3   0   22.90    7.10
 -27   3   0   25.50    2.40
  29  -3   0  115.79   11.10
 -29  -3   0   87.09   12.50
 -29  -3   0  100.99   13.60
  29  -3   0  106.19    7.20
  29  -3   0  124.09   13.70
 -29  -3   0   95.09    7.10
  29  -3   0  109.39    7.10
  29   3   0  104.89   12.20
  29   3   0  100.89    7.10
 -29   3   0  110.69   13.00
  29   3   0  113.79   12.50
 -29   3   0   96.29    7.10
 -29   3   0   91.49   14.40
  29   3   0   94.69    7.20
 -31  -3   0   21.10    2.50
  31  -3   0    8.60    6.70
  31  -3   0   14.80    2.50
  31  -3   0   16.30    6.40
 -31  -3   0    6.20    6.80
 -31  -3   0   13.00    7.30
  31  -3   0   16.50    2.20
  31   3   0   18.90    7.30
  31   3   0   12.70    2.10
 -31   3   0    6.90    7.90
  31   3   0   12.60    6.10
  31   3   0   15.80    2.60
 -31   3   0   20.00    8.10
 -31   3   0   16.80    2.30
  33  -3   0   27.00    2.80
 -33  -3   0   18.80    8.20
 -33  -3   0   32.90    3.10
 -33  -3   0   19.80    8.90
  33  -3   0   30.90    3.10
  33  -3   0   24.80    7.80
 -33   3   0   34.70    3.00
 -33   3   0   32.80    9.60
  33   3   0   29.20    8.30
  33   3   0   25.30    3.10
  33   3   0   30.30    3.20
  33   3   0   24.70    7.90
 -35  -3   0   20.10    2.70
  35  -3   0   15.20    2.50
  35  -3   0   15.10    2.50
  35  -3   0    9.60    6.80
 -35  -3   0   18.70    8.50
 -35   3   0   21.50    9.20
  35   3   0   20.10    2.90
  35   3   0   16.30    7.60
  35   3   0   21.10    2.70
 -35   3   0   20.40    2.80
 -37  -3   0    3.20    2.30
  37  -3   0    5.20    2.10
  37  -3   0    2.90    1.80
  37   3   0    2.80    2.20
  37   3   0    3.90    2.10
 -39  -3   0    2.90    2.40
  39  -3   0    2.90    2.20
  39   3   0   -0.60    2.10
  39   3   0    0.80    2.30
 -41  -3   0    7.00    2.60
  41  -3   0    5.20    2.10
  41   3   0    4.30    2.30
  41   3   0    5.40    2.20
 -43  -3   0    1.70    2.60
  43  -3   0    1.10    2.30
  43   3   0    2.00    2.10
  43   3   0    2.40    2.40
 -45  -3   0    5.40    2.80
  45  -3   0    6.50    2.30
  45   3   0    2.50    2.30
 -45   3   0    5.70    2.70
  45   3   0    3.10    2.60
 -47  -3   0   25.30    3.60
  47  -3   0   25.90    3.30
 -47   3   0   15.90    3.20
  47   3   0   22.70    3.40
   0  -4   0 2524.55  181.28
   0   4   0 2770.82  181.38
   0   4   0 2886.41  180.78
   2  -4   0  259.87   16.90
  -2  -4   0  251.27   17.30
   2  -4   0  269.87   18.30
  -2  -4   0  244.48   17.80
  -2   4   0  231.68   16.80
   2   4   0  219.38   17.20
   2   4   0  229.98   17.70
  -2   4   0  253.07   18.30
   4  -4   0 1672.23  108.09
   4  -4   0 1568.34  106.79
  -4  -4   0 1568.64  107.49
  -4  -4   0 1539.55  107.19
  -4   4   0 1603.24  106.59
  -4   4   0 1566.54  107.89
   4   4   0 1598.84  107.49
   4   4   0 1733.13  107.39
  -6  -4   0  142.49   12.40
   6  -4   0  143.69   13.80
  -6  -4   0  136.69   13.00
  -6   4   0  204.48   14.40
   6   4   0  195.18   12.90
   6   4   0  178.08   13.10
   8  -4   0  958.30   67.69
  -8  -4   0  894.91   66.39
   8  -4   0  882.31   65.89
  -8  -4   0 1043.00   67.09
  -8  -4   0 1107.79   66.89
   8   4   0  978.90   66.59
  -8   4   0 1020.40   67.89
  -8   4   0 1001.80   66.19
 -10  -4   0  833.02   53.29
  10  -4   0  769.52   53.99
  10  -4   0  644.64   51.69
 -10  -4   0  790.42   52.59
 -10  -4   0  866.11   52.89
 -10   4   0  679.33   52.09
 -10   4   0  713.03   53.69
  10   4   0  883.21   52.99
  12  -4   0  445.26   36.10
 -12  -4   0  613.84   37.60
 -12  -4   0  557.74   37.20
  12  -4   0  524.65   38.50
 -12   4   0  485.85   38.60
 -12   4   0  458.75   36.60
  12   4   0  607.74   37.70
  12   4   0  574.04   37.40
 -14  -4   0  246.68   19.70
  14  -4   0  274.27   21.40
 -14  -4   0  256.87   20.10
  14  -4   0  235.48   18.70
 -14   4   0  259.87   19.50
  14   4   0  271.97   20.10
 -14   4   0  286.37   21.90
  14   4   0  279.77   20.10
  16  -4   0  194.08   17.80
  16  -4   0  191.58   15.50
  16  -4   0  200.28   14.00
 -16  -4   0  201.18   16.60
 -16  -4   0  230.68   17.20
  16   4   0  242.78   17.30
 -16   4   0  217.88   19.10
 -16   4   0  190.58   16.30
  16   4   0  230.58   17.10
  18  -4   0    7.60    3.50
 -18  -4   0   28.90    5.90
 -18  -4   0   28.90    6.10
  18  -4   0   12.30    1.90
  18  -4   0   11.20    5.50
 -18   4   0    8.20    6.30
 -18   4   0   10.20    4.80
  18   4   0   17.70    4.80
  18   4   0   19.50    5.20
 -20  -4   0   91.99    9.80
  20  -4   0   61.49    7.90
  20  -4   0   65.99   10.60
 -20  -4   0  103.89   10.70
  20   4   0   94.89    9.80
  20   4   0   87.99    9.80
 -20   4   0   60.59   11.30
 -22  -4   0  200.88   13.90
 -22  -4   0  205.08   17.50
  22  -4   0  207.88   13.90
  22  -4   0  226.78   19.00
  22  -4   0  219.88   16.30
 -22  -4   0  216.88   18.50
 -22   4   0  194.78   17.20
  22   4   0  215.58   17.70
  22   4   0  201.38   13.90
  22   4   0  207.18   17.50
  22   4   0  194.68   13.90
 -22   4   0  234.38   20.50
 -24  -4   0   70.29   10.10
  24  -4   0   64.09   10.10
  24  -4   0   61.89    7.80
 -24  -4   0   69.59    4.50
  24  -4   0   61.19    4.60
  24  -4   0   56.99    4.40
 -24  -4   0   70.09    9.40
  24   4   0   54.69    4.50
 -24   4   0   51.69    9.30
  24   4   0   62.99    9.20
 -24   4   0   54.09   11.40
  24   4   0   61.89    4.60
  24   4   0   59.99    8.70
 -26  -4   0   24.90    2.70
 -26  -4   0   25.80    7.60
 -26  -4   0   36.20    8.80
  26  -4   0   46.50    6.90
  26  -4   0   47.20    9.70
  26   4   0   30.20    3.00
 -26   4   0   39.70   10.10
  26   4   0   29.30    2.90
 -26   4   0   55.79    9.30
  26   4   0   32.90    7.20
  26   4   0   25.70    7.00
  28  -4   0   38.80    7.40
 -28  -4   0   29.80    7.90
  28  -4   0   41.10    9.90
 -28  -4   0   38.20    3.10
 -28  -4   0   39.30    9.20
  28  -4   0   33.50    3.20
  28   4   0   41.10    8.50
 -28   4   0   30.50    3.10
 -28   4   0   27.80    9.90
  28   4   0   31.40    3.10
  28   4   0   35.90    3.30
 -28   4   0   29.00    8.00
  28   4   0   41.00    8.10
  30  -4   0   46.20    4.20
 -30  -4   0   54.39   10.60
  30  -4   0   47.60    8.20
 -30  -4   0   52.79    4.20
  30  -4   0   49.20   10.30
 -30  -4   0   60.49   11.40
  30   4   0   66.49    9.60
  30   4   0   57.59    4.20
 -30   4   0   54.89    4.10
 -30   4   0   41.60   11.70
  30   4   0   58.49   10.00
 -30   4   0   46.20    9.90
  30   4   0   51.99    4.40
  32  -4   0   34.40    8.10
 -32  -4   0   52.89    3.80
 -32  -4   0   48.70   10.60
 -32  -4   0   34.20    8.90
  32  -4   0   41.20    3.80
 -32   4   0   35.70    9.60
  32   4   0   39.70    8.90
  32   4   0   46.40    3.90
  32   4   0   49.30    3.80
  32   4   0   50.39    9.30
 -32   4   0   42.40    3.80
  34  -4   0    6.30    6.00
 -34  -4   0    3.20    7.30
 -34  -4   0    2.10    2.10
  34  -4   0    0.80    2.00
 -34  -4   0    3.80    7.30
  34   4   0   -1.00    1.80
  34   4   0    0.50    5.40
  34   4   0    2.80    2.10
 -34   4   0    3.40    8.10
  34   4   0    5.20    6.70
 -36  -4   0   11.20    2.40
  36  -4   0    5.00    2.20
  36   4   0    9.20    2.50
  36   4   0    7.10    2.30
 -38  -4   0   17.10    2.90
  38   4   0   20.20    2.70
  38   4   0   19.80    2.90
 -40  -4   0   -0.40    2.60
  40  -4   0    0.30    2.10
 -40   4   0   -0.60    2.30
  40   4   0   -1.40    2.20
  40   4   0   -0.80    2.30
 -42  -4   0    0.10    2.50
  42  -4   0    2.10    2.10
  42   4   0   -2.80    2.10
 -42   4   0    1.00    2.40
  42   4   0    0.10    2.30
 -44  -4   0    5.80    2.90
  44  -4   0    6.50    2.50
 -44   4   0   10.70    2.70
  44   4   0    8.20    2.70
  44   4   0    5.40    2.50
 -46  -4   0    4.20    2.80
  46  -4   0    4.50    2.30
  46   4   0    1.80    2.60
 -46   4   0    0.60    2.60
 -48  -4   0    7.60    3.10
 -48   4   0    6.00    2.90
   1  -5   0 5236.58  340.77
  -1  -5   0 5004.00  340.47
  -1   5   0 5101.19  340.67
   1   5   0 5206.48  340.57
  -3  -5   0  171.38   13.10
   3  -5   0  175.58   14.60
  -3  -5   0  163.28   13.70
   3  -5   0  179.78   12.50
   3   5   0  148.99   13.60
   3   5   0  180.88   13.20
  -3   5   0  177.58   12.60
  -3   5   0  188.68   14.70
  -5  -5   0  675.93   46.00
  -5  -5   0  716.23   46.40
   5  -5   0  575.34   44.90
   5  -5   0  656.03   46.80
  -5   5   0  665.33   46.90
   5   5   0  745.53   46.20
   5   5   0  718.33   46.30
  -5   5   0  628.94   45.10
   7  -5   0   74.59    9.00
  -7  -5   0   60.29    6.60
  -7  -5   0   54.79    7.70
   7  -5   0   62.19    5.70
   7  -5   0   60.29    6.60
   7   5   0   75.19    7.80
   7   5   0   83.49    7.50
  -7   5   0   92.59    9.60
  -9  -5   0   39.20    6.70
  -9  -5   0   48.20    5.60
   9  -5   0   35.00    5.80
  -9  -5   0   41.90    5.80
   9  -5   0   64.59    8.40
   9  -5   0   47.30    4.80
  11  -5   0  174.18   14.70
 -11  -5   0  202.68   15.60
 -11  -5   0  193.38   16.40
 -11  -5   0  199.38   15.60
  11  -5   0  213.28   17.60
 -11   5   0  205.68   17.60
  11   5   0  226.98   16.10
 -11   5   0  203.28   15.10
  13  -5   0  312.37   25.30
 -13  -5   0  343.07   24.00
  13  -5   0  294.77   22.70
 -13  -5   0  328.37   23.60
 -13  -5   0  321.37   24.50
 -13   5   0  320.17   25.50
  13   5   0  341.87   24.00
 -13   5   0  322.87   23.40
  15  -5   0  167.08   11.50
  15  -5   0  163.38   15.70
 -15  -5   0  167.48   14.50
 -15  -5   0  180.98   14.50
  15  -5   0  159.68   13.10
 -15   5   0  176.08   16.40
  15   5   0  192.38   14.60
 -15   5   0  176.48   14.00
 -17  -5   0  155.48   10.70
  17  -5   0  151.28   12.50
 -17  -5   0  163.58   13.90
  17  -5   0  160.88   10.80
 -17  -5   0  179.68   14.30
  17  -5   0  171.08   16.00
 -17   5   0  162.78   16.00
 -17   5   0  149.99   10.80
 -17   5   0  145.59   13.50
  17   5   0  177.18   14.50
  17   5   0  174.98   14.20
  19  -5   0  160.08   11.50
  19  -5   0  162.58   13.50
 -19  -5   0  149.69   14.80
 -19  -5   0  168.58   15.40
  19  -5   0  161.78   16.30
  19   5   0  184.78   15.10
 -19   5   0  177.58   17.60
  19   5   0  189.48   15.20
 -19   5   0  180.48   11.50
 -19   5   0  172.88   14.50
 -21  -5   0  146.89   13.90
  21  -5   0  145.79   12.30
  21  -5   0  156.08   15.80
 -21  -5   0  160.58   14.60
 -21  -5   0  139.79   10.00
  21  -5   0  162.08   10.10
  21   5   0  142.09   10.00
 -21   5   0  140.89   10.00
  21   5   0  139.69   13.80
  21   5   0  157.58   13.90
 -21   5   0  168.28   16.90
  21   5   0  144.79   10.00
 -21   5   0  146.69   13.80
  23  -5   0   32.60    5.80
 -23  -5   0   27.70    7.20
  23  -5   0   34.00    8.50
  23  -5   0   31.70    2.60
 -23  -5   0   27.40    7.00
 -23  -5   0   27.40    2.50
 -23   5   0   29.10    7.20
  23   5   0   40.40    7.60
  23   5   0   20.30    2.50
  23   5   0   29.90    6.90
  23   5   0   21.60    2.70
 -23   5   0   27.70    2.60
 -23   5   0   21.20    8.50
 -25  -5   0   18.10    6.80
 -25  -5   0   17.60    7.00
 -25  -5   0   23.30    2.30
  25  -5   0   16.40    2.40
  25  -5   0   15.00    6.90
  25  -5   0   16.50    5.10
 -25   5   0   19.50    2.40
  25   5   0   20.20    2.40
 -25   5   0   20.00    6.80
  25   5   0   22.70    7.00
  25   5   0   22.60    2.50
  25   5   0   25.90    6.70
 -25   5   0   15.30    8.10
 -27  -5   0   18.50    6.90
 -27  -5   0   13.50    6.50
  27  -5   0   19.90    5.40
  27  -5   0   13.80    2.30
  27  -5   0   18.10    7.70
  27   5   0   20.40    6.80
 -27   5   0   18.20    8.70
  27   5   0   16.20    2.40
 -27   5   0   11.00    6.50
 -27   5   0   14.90    2.30
  27   5   0   22.60    6.50
  29  -5   0   33.10    7.10
 -29  -5   0   23.90    7.70
 -29  -5   0   36.60    9.50
  29  -5   0   31.80    3.30
  29  -5   0   34.10    9.60
 -29  -5   0   38.40    3.30
  29   5   0   46.60    8.80
 -29   5   0   41.20    3.90
 -29   5   0   41.20    3.40
  29   5   0   38.40    8.50
 -29   5   0   26.00    8.10
  29   5   0   38.90    3.50
  29   5   0   38.20    3.30
 -29   5   0   34.20   10.70
 -31  -5   0   22.50    7.90
 -31  -5   0   31.90    9.20
  31  -5   0   30.90    2.90
 -31  -5   0   32.00    2.90
  31  -5   0   27.00    6.50
  31   5   0   26.10    3.00
 -31   5   0   26.60    3.00
  31   5   0   25.50    7.90
  31   5   0   23.30    2.90
 -31   5   0   21.10    8.20
  31   5   0   23.80    7.60
 -33  -5   0    2.00    6.50
  33  -5   0    0.80    5.50
 -33  -5   0    5.90    2.10
  33  -5   0    3.00    1.90
 -33  -5   0    2.90    6.60
  33   5   0    3.40    2.10
 -33   5   0    7.30   10.90
 -33   5   0    4.10    2.00
  33   5   0   -0.10    1.90
  33   5   0    8.40    5.90
  33   5   0   -0.80    7.30
 -35  -5   0   20.00    2.80
 -35  -5   0   12.20   12.60
  35  -5   0   14.00    2.40
 -35   5   0   22.30    2.70
  35   5   0   16.60    2.50
  35   5   0   15.70    2.90
  37  -5   0    4.10    2.10
 -37  -5   0    3.50    2.30
 -37   5   0    3.80    2.20
  37   5   0   -0.80    2.00
  37   5   0    1.80    2.40
 -39  -5   0   11.70    2.60
  39  -5   0   11.70    2.30
  39   5   0    8.40    2.50
 -39   5   0   10.00    2.40
  39   5   0   10.80    2.60
 -41  -5   0    8.40    2.60
  41  -5   0    5.40    2.30
 -41   5   0    9.40    2.60
  41   5   0   10.20    2.60
  41   5   0    5.00    2.30
 -43  -5   0    5.90    2.70
  43  -5   0    4.00    2.30
  43   5   0    6.00    2.60
  43   5   0    4.10    2.30
 -43   5   0    2.70    2.40
  45  -5   0    2.80    2.30
 -45  -5   0    1.80    2.70
  45   5   0    3.00    2.70
 -45   5   0    2.30    2.60
 -47  -5   0    6.20    3.00
  47  -5   0    6.10    2.30
 -47   5   0    6.60    2.90
  47   5   0    5.00    2.80
   0  -6   0 9999.00  645.44
   0   6   0 9505.15  645.24
  -2  -6   0  725.53   47.60
   2  -6   0  676.63   48.00
   2  -6   0  648.14   46.50
  -2  -6   0  747.83   47.10
  -2   6   0  643.74   47.80
  -2   6   0  622.64   46.40
   2   6   0  720.63   47.80
   2   6   0  716.23   46.90
   4  -6   0   28.80    4.00
   4  -6   0   45.60    7.90
  -4  -6   0   14.90    4.80
  -4  -6   0   36.30    5.10
  -4   6   0   32.60    6.70
  -4   6   0   27.30    4.00
   4   6   0   22.00    5.30
   4   6   0   28.10    4.90
   6  -6   0   52.49    4.60
  -6  -6   0   32.60    6.40
  -6  -6   0   40.10    5.70
   6  -6   0   58.19    8.50
   6   6   0   39.40    6.00
   6   6   0   35.20    6.20
  -6   6   0   50.09    4.90
  -6   6   0   46.10    8.10
   8  -6   0   26.00    4.90
   8  -6   0   35.60    7.10
  -8  -6   0   17.00    5.20
   8  -6   0   26.20    3.80
  -8  -6   0   22.30    4.70
   8   6   0   22.90    5.40
  -8   6   0   39.80    7.40
   8   6   0   32.70    5.60
  10  -6   0   20.80    4.40
 -10  -6   0   15.20    4.20
  10  -6   0   23.20    6.60
  10  -6   0   20.80    3.50
 -10  -6   0   16.30    4.40
 -10  -6   0   14.30    5.40
 -10   6   0   22.50    6.70
  10   6   0   20.30    5.20
  12  -6   0    5.80    2.90
 -12  -6   0    3.70    3.40
  12  -6   0    6.20    3.60
 -12  -6   0   12.00    4.20
  12  -6   0    7.60    5.40
 -12  -6   0    9.80    4.50
  12   6   0   16.60    4.70
 -12   6   0    8.70    5.50
  14  -6   0  105.89    9.30
  14  -6   0  121.39   12.40
  14  -6   0  114.09    7.60
 -14  -6   0  103.59   10.30
 -14  -6   0  100.59    7.50
 -14  -6   0  108.59   10.50
 -14  -6   0  102.49   11.80
  14   6   0  123.59   11.00
 -14   6   0  143.69   13.70
 -14   6   0  133.39   10.40
 -16  -6   0  178.08   15.00
  16  -6   0  159.58   10.60
 -16  -6   0  173.28   13.90
  16  -6   0  148.79   12.30
 -16  -6   0  167.58   13.80
  16  -6   0  165.28   15.90
 -16  -6   0  150.88   10.50
 -16   6   0  148.59   13.20
 -16   6   0  144.29   15.90
 -16   6   0  148.19   10.60
  16   6   0  170.58   14.10
  18  -6   0   18.90    7.20
 -18  -6   0   27.00    6.00
 -18  -6   0   35.80    6.60
  18  -6   0   15.10    2.00
  18   6   0   34.70    6.70
 -18   6   0   15.60    2.10
 -18   6   0   13.50    7.00
 -18   6   0   12.00    5.10
 -20  -6   0   96.29    6.40
 -20  -6   0  101.39   11.10
  20  -6   0   98.89   12.20
  20  -6   0   87.89    6.50
  20  -6   0   81.99    8.60
  20   6   0  110.99   11.10
 -20   6   0   86.49   10.30
 -20   6   0   94.29    6.60
  20   6   0   94.09    6.50
 -20   6   0   93.29   12.90
 -22  -6   0   47.50    9.00
 -22  -6   0   59.49    4.30
 -22  -6   0   56.79    9.10
  22  -6   0   37.30    9.50
  22   6   0   63.39    8.70
  22   6   0   67.79    4.30
  22   6   0   50.39    4.30
 -22   6   0   28.30    9.40
  22   6   0   60.49    9.10
  24  -6   0   76.69   11.80
  24  -6   0   84.29    5.80
 -24  -6   0   72.79    5.80
 -24  -6   0   64.69   10.90
  24  -6   0   82.79    8.80
 -24  -6   0   79.69   10.80
 -24   6   0   94.69    5.90
 -24   6   0   97.59   10.90
  24   6   0   85.39   10.60
  24   6   0   69.89    5.90
 -24   6   0  102.19   13.70
  24   6   0   90.59   10.70
  24   6   0   85.09    5.90
 -26  -6   0   86.99   12.20
 -26  -6   0   76.99   11.30
 -26  -6   0   93.59    6.70
  26  -6   0   80.49    9.60
  26  -6   0  101.89   13.10
  26  -6   0   79.89    6.70
  26   6   0  110.29    6.80
  26   6   0  102.29    6.80
 -26   6   0  102.19   12.10
  26   6   0  104.99   11.80
 -26   6   0   95.99   14.40
  26   6   0  132.49   12.60
 -26   6   0   96.59    6.80
 -28  -6   0   15.60    2.20
  28  -6   0   10.40    2.10
  28  -6   0    7.20    6.70
  28  -6   0    9.60    5.10
 -28  -6   0    9.40    6.30
 -28  -6   0   17.30    6.80
 -28   6   0   17.50    8.80
 -28   6   0   19.50    2.30
 -28   6   0   12.40    6.90
  28   6   0   16.90    7.00
  28   6   0   18.10    2.50
  28   6   0   17.30    2.20
  28   6   0   14.80    6.00
 -30  -6   0   24.70    8.30
  30  -6   0   22.80    6.50
 -30  -6   0   28.60    2.90
 -30  -6   0   24.40    8.20
  30  -6   0   30.10    3.00
 -30   6   0   28.40    8.60
 -30   6   0   30.60    3.10
  30   6   0   29.50    8.60
  30   6   0   37.50    8.60
  30   6   0   31.90    3.10
  30   6   0   29.80    3.30
 -32  -6   0    8.00    2.20
 -32  -6   0    7.90    8.50
  32  -6   0    5.10    5.50
  32  -6   0    8.60    2.10
 -32  -6   0    9.30    6.90
  32   6   0    1.60    2.10
  32   6   0    6.00    2.10
  32   6   0    4.80    5.40
 -32   6   0   11.90    2.10
  34  -6   0    4.30    2.10
 -34  -6   0    0.20    6.10
 -34  -6   0    3.60    2.20
  34   6   0   -4.30    2.00
  34   6   0    3.20    5.50
  34   6   0    0.80    2.20
 -34   6   0    8.30    2.10
 -36  -6   0    8.10    2.30
  36  -6   0    7.50    2.10
 -36   6   0   14.10    2.40
  36   6   0    9.80    2.50
  36   6   0    5.10    2.30
  38  -6   0   28.50    3.20
 -38  -6   0   31.80    3.40
  38   6   0   27.00    3.50
  38   6   0   31.30    3.30
 -38   6   0   33.10    3.60
  40  -6   0    5.10    2.20
 -40  -6   0    4.70    2.50
 -40   6   0    2.20    2.50
  40   6   0    0.50    2.20
  40   6   0    0.60    2.50
  42  -6   0   10.20    2.40
 -42  -6   0    8.50    2.70
  42   6   0    7.40    2.60
  42   6   0    3.70    2.40
 -42   6   0    7.00    2.60
  44  -6   0    2.80    2.20
 -44  -6   0    5.00    3.00
  44   6   0    4.80    2.70
 -44   6   0    2.60    2.60
 -46  -6   0    5.60    3.00
  46  -6   0    4.60    2.40
 -46   6   0    0.20    2.80
  46   6   0    3.60    2.70
   1  -7   0  667.83   48.80
   1  -7   0  666.13   50.09
  -1  -7   0  742.13   49.10
  -1  -7   0  766.52   50.19
   1   7   0  792.72   50.19
  -1   7   0  692.93   50.09
  -1   7   0  654.03   48.60
   1   7   0  758.62   49.00
  -3  -7   0   41.40    5.50
  -3  -7   0   40.60    7.10
   3  -7   0   49.50    7.90
   3  -7   0   37.00    4.70
   3   7   0   23.10    6.00
  -3   7   0   31.90    4.60
   3   7   0   29.10    5.20
  -3   7   0   32.30    7.20
   5  -7   0   23.90    4.00
  -5  -7   0   21.40    5.60
  -5  -7   0   24.30    5.00
   5  -7   0   25.00    6.60
   5   7   0   18.80    5.00
  -5   7   0   35.80    4.20
   5   7   0   31.10    5.40
  -5   7   0   39.10    7.50
   7  -7   0   81.09    6.40
   7  -7   0   92.79   10.40
  -7  -7   0   60.69    7.40
  -7  -7   0   52.59    8.40
  -7   7   0   87.29   10.30
  -7   7   0   84.59    6.80
   7   7   0   56.09    8.30
   7   7   0   60.69    7.90
   9  -7   0  192.68   16.60
   9  -7   0  178.08   14.00
  -9  -7   0  169.38   14.30
   9  -7   0  179.38   13.10
  -9  -7   0  168.08   15.40
   9   7   0  167.48   15.10
  -9   7   0  191.18   16.70
   9   7   0  188.78   14.90
 -11  -7   0  213.58   17.30
 -11  -7   0  233.58   18.60
  11  -7   0  212.58   16.40
  11  -7   0  217.68   19.30
  11  -7   0  222.68   15.80
  11   7   0  221.88   17.60
 -11   7   0  206.88   19.10
  13  -7   0  394.36   31.20
 -13  -7   0  445.96   32.20
 -13  -7   0  450.25   32.30
  13  -7   0  467.45   34.40
 -13  -7   0  426.96   29.60
  13  -7   0  457.75   29.60
  13  -7   0  440.96   30.90
 -13  -7   0  454.15   33.50
  13   7   0  488.95   33.00
 -13   7   0  453.95   29.70
 -13   7   0  449.66   34.10
  15  -7   0   12.60    1.70
 -15  -7   0   24.00    5.10
  15  -7   0    9.30    3.40
  15  -7   0    6.90    3.50
 -15  -7   0   11.70    5.60
  15  -7   0    8.00    5.90
 -15  -7   0   26.40    5.50
 -15   7   0   10.10    1.80
  15   7   0   15.50    5.40
 -15   7   0    7.00    6.10
  17  -7   0  186.38   17.60
 -17  -7   0  163.78   15.00
  17  -7   0  160.48   13.60
 -17  -7   0  157.88   14.90
 -17  -7   0  153.88   11.70
 -17  -7   0  169.98   16.40
  17  -7   0  172.88   11.70
 -17   7   0  190.08   11.80
 -17   7   0  203.88   18.20
 -17   7   0  201.88   14.90
  17   7   0  194.38   15.80
  19  -7   0   76.49   12.40
  19  -7   0   77.69    8.20
 -19  -7   0   95.39   10.40
 -19  -7   0   93.59    5.90
 -19  -7   0  102.89   11.90
  19  -7   0   80.19    6.00
 -19  -7   0   92.29   10.20
  19   7   0   86.49    6.00
 -19   7   0   76.99    6.00
 -19   7   0   75.19    9.50
 -19   7   0   79.89   12.60
  19   7   0   77.29   10.30
 -21  -7   0  186.78   12.20
 -21  -7   0  218.18   16.80
  21  -7   0  160.98   17.80
 -21  -7   0  190.88   16.60
 -21  -7   0  200.48   18.00
 -21   7   0  156.18   15.40
 -21   7   0  147.79   18.50
 -21   7   0  159.08   12.30
  21   7   0  194.58   12.30
  21   7   0  208.98   17.10
 -23  -7   0   86.19   11.20
 -23  -7   0   81.79   11.10
 -23  -7   0   90.79   12.30
  23  -7   0   76.99    8.80
  23  -7   0   83.09   12.50
  23  -7   0   89.89    6.40
 -23  -7   0   84.79    6.30
  23   7   0   93.89    6.40
 -23   7   0  100.19    6.50
  23   7   0   93.59   11.40
 -23   7   0  103.19   11.30
  23   7   0   88.89    6.40
 -23   7   0  106.69   14.30
  25  -7   0   58.89    7.80
 -25  -7   0   63.69   10.20
 -25  -7   0   63.99   10.40
  25  -7   0   72.09    4.80
 -25  -7   0   68.99    4.70
  25  -7   0   74.09   11.90
 -25   7   0   57.69   12.50
 -25   7   0   59.69    9.80
  25   7   0   60.79    4.80
 -25   7   0   57.89    4.90
  25   7   0   58.69    4.90
  25   7   0   62.29   10.10
 -27  -7   0   33.20    8.40
  27  -7   0   32.20    9.80
 -27  -7   0   25.60    7.60
  27  -7   0   29.80    6.00
 -27  -7   0   26.80    2.80
  27  -7   0   27.30    2.70
 -27   7   0   29.60    7.80
  27   7   0   28.30    8.10
  27   7   0   20.30    2.80
 -27   7   0   18.90    9.20
  27   7   0   27.20    2.90
 -27   7   0   32.60    2.90
 -29  -7   0   26.20    8.10
 -29  -7   0   15.30    6.90
  29  -7   0   10.50    2.20
  29  -7   0    6.00    5.10
 -29   7   0   13.80    2.30
 -29   7   0    7.10    6.70
  29   7   0   21.60    2.50
  29   7   0   26.20    7.70
 -31  -7   0    8.10    6.70
  31  -7   0   13.80    2.50
 -31  -7   0   16.10    2.40
  31   7   0   16.00    6.40
  31   7   0   13.90    2.50
 -31   7   0   17.40    2.40
  31   7   0   13.70    2.30
 -33  -7   0    6.30    7.30
  33  -7   0    9.10    2.20
 -33  -7   0   13.60    2.40
 -33   7   0    9.90    2.30
  33   7   0    8.70    2.40
  33   7   0    7.50    6.10
  33   7   0    6.00    2.20
 -35  -7   0    6.50    2.40
  35  -7   0   14.30    2.30
 -35  -7   0   14.50    9.20
  35   7   0    4.00    2.20
  35   7   0    8.00    2.50
  37  -7   0   10.20    2.30
 -37  -7   0   10.80    2.40
  37   7   0    8.90    2.60
  37   7   0    7.50    2.40
 -37   7   0    9.70    2.50
  39  -7   0    8.50    2.20
 -39  -7   0   10.80    2.50
 -39   7   0    7.50    2.50
  39   7   0    3.60    2.60
  39   7   0    4.90    2.40
 -41  -7   0   23.10    3.10
  41  -7   0   20.40    2.80
  41   7   0   19.30    2.90
 -41   7   0   23.10    3.40
  41   7   0   19.50    3.40
  43  -7   0    4.60    2.40
 -43  -7   0    8.10    2.70
 -43   7   0    6.20    2.70
  43   7   0    6.60    2.80
  43   7   0    5.20    3.50
 -45  -7   0    2.10    2.90
  45  -7   0    1.90    2.40
 -45   7   0   -0.90    2.60
  45   7   0   -0.40    2.70
 -47  -7   0    6.20    2.90
   0  -8   0  717.23   50.19
   0  -8   0  721.93   51.39
   0   8   0  732.13   49.90
   0   8   0  753.72   51.39
   2  -8   0  185.68   15.20
   2  -8   0  172.08   12.70
  -2  -8   0  194.38   13.20
  -2  -8   0  179.18   14.60
   2   8   0  147.79   12.90
  -2   8   0  139.99   14.40
  -2   8   0  134.49   12.40
   2   8   0  149.88   14.20
   4  -8   0   16.70    3.70
   4  -8   0   16.80    6.40
  -4  -8   0   10.10    4.10
  -4  -8   0   10.10    4.70
   4   8   0   11.60    4.00
  -4   8   0   26.60    7.00
   4   8   0   12.80    5.10
  -4   8   0   21.90    4.20
  -6  -8   0  154.18   15.30
   6  -8   0  184.38   16.40
   6  -8   0  172.48   13.50
  -6  -8   0  178.78   14.70
   6   8   0  178.18   15.60
   6   8   0  194.98   14.90
  -6   8   0  193.48   16.90
  -6   8   0  194.28   13.70
  -8  -8   0   24.50    5.20
   8  -8   0   21.40    3.80
  -8  -8   0   14.10    5.30
   8  -8   0   21.50    6.80
   8   8   0   21.50    5.50
   8   8   0   18.70    5.50
  -8   8   0   15.00    6.70
  -8   8   0   16.50    3.60
 -10  -8   0  463.15   36.80
 -10  -8   0  543.55   38.20
  10  -8   0  493.15   35.50
  10  -8   0  548.15   39.00
 -10  -8   0  555.34   34.40
  10  -8   0  530.05   36.40
  10   8   0  531.55   37.70
  10   8   0  530.25   37.30
 -10   8   0  515.05   38.90
 -10   8   0  495.45   34.60
 -12  -8   0  119.69   12.50
  12  -8   0  123.39   13.60
 -12  -8   0  143.59   11.40
  12  -8   0   96.79    9.50
  12  -8   0  120.19    8.00
 -12  -8   0  123.59    8.00
 -12   8   0  113.39    8.20
 -12   8   0  108.79   13.50
  12   8   0  120.69   11.80
  14  -8   0  159.88   15.00
  14  -8   0  194.28   13.20
 -14  -8   0  201.48   18.00
  14  -8   0  203.28   18.90
  14  -8   0  186.48   14.70
 -14  -8   0  217.38   16.60
 -14  -8   0  202.88   13.20
 -14  -8   0  194.58   16.30
 -14   8   0  217.98   19.10
  14   8   0  240.08   17.50
 -14   8   0  192.08   13.30
 -16  -8   0  118.99   10.70
  16  -8   0   73.79   12.50
 -16  -8   0  106.69    6.80
 -16  -8   0  111.49   12.10
 -16  -8   0  118.29   10.90
 -16   8   0   75.19    6.90
  16   8   0  105.99    6.90
 -16   8   0   73.29   12.50
  16   8   0  111.39   11.30
  18  -8   0  152.58   13.00
 -18  -8   0  164.08   16.10
 -18  -8   0  173.98   14.90
  18  -8   0  163.08   11.10
 -18  -8   0  155.08   11.00
  18  -8   0  170.48   13.30
  18  -8   0  191.98   17.90
 -18  -8   0  172.48   14.90
 -18   8   0  160.08   11.10
  18   8   0  158.88   15.20
  18   8   0  162.88   11.10
 -18   8   0  175.38   17.80
  20  -8   0   34.70   10.20
 -20  -8   0   53.99    8.80
 -20  -8   0   63.69    4.40
 -20  -8   0   70.39    9.10
 -20  -8   0   62.49   10.90
  20   8   0   58.29    9.50
  20   8   0   58.09    4.50
 -22  -8   0   74.19   11.70
 -22  -8   0   78.29   10.20
  22  -8   0   91.49   13.00
 -22  -8   0   68.59    5.40
  22  -8   0   87.99    8.20
  22  -8   0   83.79    5.50
 -22  -8   0   70.29   10.40
 -22   8   0   89.49    5.70
 -22   8   0   96.69   10.50
  22   8   0   65.69    5.60
 -22   8   0   82.99   13.50
  22   8   0   72.09    5.50
  22   8   0   76.69   10.70
 -24  -8   0  173.38   18.00
  24  -8   0  201.18   12.20
 -24  -8   0  150.78   16.20
 -24  -8   0  184.18   16.90
 -24  -8   0  163.48   12.10
  24  -8   0  204.88   19.10
  24  -8   0  169.28   14.40
  24   8   0  177.28   12.20
 -24   8   0  184.78   19.50
 -24   8   0  216.88   16.70
  24   8   0  155.18   16.70
 -24   8   0  189.68   12.20
  24   8   0  172.88   12.20
 -26  -8   0   52.79    4.10
 -26  -8   0   55.09    9.70
  26  -8   0   60.09   11.40
 -26  -8   0   48.50    9.70
  26  -8   0   45.00    7.30
 -26  -8   0   42.80   10.20
  26  -8   0   49.90    4.20
  26   8   0   61.79   10.20
 -26   8   0   60.09   10.10
  26   8   0   52.69    4.30
 -26   8   0   58.59    4.40
  26   8   0   57.79    4.30
 -26   8   0   59.29   12.80
 -28  -8   0   41.00   10.20
 -28  -8   0   51.69    3.80
 -28  -8   0   42.90    9.90
 -28  -8   0   37.50    8.70
  28  -8   0   38.30    7.20
  28  -8   0   44.00    3.80
  28   8   0   42.70    9.50
  28   8   0   49.80    3.90
 -28   8   0   48.70    4.00
  28   8   0   47.70    4.00
 -28   8   0   31.60    8.20
 -30  -8   0   16.10    7.30
 -30  -8   0   12.40    8.20
 -30  -8   0   27.50    2.80
  30  -8   0   22.80    2.70
  30   8   0   23.90    2.90
 -30   8   0   21.30    3.00
  30   8   0   20.50    3.00
 -32  -8   0   61.29   12.80
 -32  -8   0   64.19   12.40
 -32  -8   0   60.39    5.10
  32  -8   0   72.19    5.10
  32   8   0   64.49    5.20
  32   8   0   64.39    5.30
 -32   8   0   75.49    5.30
 -34  -8   0    7.50    8.90
  34  -8   0   13.00    2.50
 -34  -8   0   16.10    2.60
 -34  -8   0    7.30    7.60
 -34   8   0   19.80    2.70
  34   8   0   15.10    2.70
  34   8   0   11.00    2.50
  36  -8   0   10.60    2.20
 -36  -8   0   11.10    2.40
  36   8   0    3.70    2.30
  36   8   0    6.20    2.60
 -36   8   0    8.80    2.50
 -38  -8   0   16.00    2.80
  38  -8   0   13.20    2.60
  38   8   0   17.00    2.90
 -38   8   0   17.50    2.80
  38   8   0   15.60    2.60
  40  -8   0    7.60    2.30
 -40  -8   0    5.40    2.50
  40   8   0    4.60    2.40
 -40   8   0    9.00    2.60
  40   8   0    5.70    2.80
  42  -8   0    2.80    2.40
 -42  -8   0    6.60    2.60
  42   8   0    0.60    2.50
  42   8   0    4.00    2.80
 -42   8   0    2.40    2.60
  44  -8   0    2.30    2.40
 -44  -8   0    4.40    2.70
  44   8   0    1.00    2.80
 -44   8   0    5.20    2.90
  46  -8   0   -0.20    2.50
 -46  -8   0    0.30    2.90
 -46   8   0   -0.40    2.90
  46   8   0    0.30    3.40
  -1  -9   0  323.67   23.20
   1  -9   0  336.67   25.10
   1  -9   0  325.27   23.10
  -1  -9   0  334.07   24.90
   1   9   0  312.67   24.50
  -1   9   0  292.07   24.30
   1   9   0  313.77   23.00
  -1   9   0  285.47   22.70
  -3  -9   0   19.90    4.70
   3  -9   0   14.10    6.50
   3  -9   0   17.70    4.20
  -3  -9   0   20.80    6.10
  -3   9   0   23.10    6.60
  -3   9   0   21.70    4.40
   3   9   0   22.60    5.00
   3   9   0   16.00    5.90
  -5  -9   0  146.39   12.90
   5  -9   0  134.69   14.70
   5  -9   0  138.99   11.80
  -5  -9   0  142.39   13.70
  -5   9   0  148.99   14.80
   5   9   0  163.48   12.90
   5   9   0  160.78   14.10
  -5   9   0  158.18   12.00
   7  -9   0  402.86   31.60
   7  -9   0  394.26   28.40
  -7  -9   0  409.36   30.60
  -7  -9   0  429.36   29.70
   7   9   0  424.06   30.60
   7   9   0  442.46   30.10
  -7   9   0  391.66   28.50
  -7   9   0  392.56   27.00
  -7   9   0  379.06   31.20
  -9  -9   0  199.78   16.90
  -9  -9   0  188.88   12.70
   9  -9   0  189.38   18.10
  -9  -9   0  199.98   15.60
   9  -9   0  179.08   14.20
  -9   9   0  188.48   17.90
   9   9   0  213.68   16.00
   9   9   0  205.08   16.70
  -9   9   0  181.98   14.50
  -9   9   0  179.28   12.80
 -11  -9   0  137.59    9.20
  11  -9   0  133.39    9.20
  11  -9   0  146.99   15.10
 -11  -9   0  146.49   12.50
 -11  -9   0  161.08   14.60
  11  -9   0  129.39   10.60
  11  -9   0  141.69   12.00
  11   9   0  133.89   13.00
 -11   9   0  121.49   14.60
  11   9   0  129.89   13.10
 -13  -9   0  335.77   23.60
  13  -9   0  225.48   20.10
  13  -9   0  263.97   23.60
 -13  -9   0  319.17   21.40
  13  -9   0  251.97   18.00
  13  -9   0  247.58   19.40
  13   9   0  305.87   18.00
 -13   9   0  243.08   23.50
 -13   9   0  231.08   18.00
  13   9   0  323.17   22.20
 -15  -9   0  159.58   12.60
 -15  -9   0  156.88   15.60
  15  -9   0  202.38   15.20
  15  -9   0  206.68   12.70
 -15  -9   0  166.38   15.70
 -15  -9   0  178.28   17.70
  15  -9   0  210.58   14.30
  15  -9   0  235.98   19.70
  15   9   0  185.18   16.60
  15   9   0  165.28   12.70
 -15   9   0  212.78   12.80
 -15   9   0  225.58   19.60
 -17  -9   0  260.57   17.40
  17  -9   0  262.07   19.30
 -17  -9   0  268.07   20.80
  17  -9   0  239.08   19.50
  17  -9   0  274.67   17.40
 -17  -9   0  296.47   23.00
 -17  -9   0  232.88   20.70
  17  -9   0  252.67   23.60
 -17   9   0  247.38   17.50
 -17   9   0  231.68   23.30
  17   9   0  279.07   17.40
  17   9   0  272.77   21.70
  19  -9   0   33.30    9.50
 -19  -9   0   29.00    7.00
 -19  -9   0   26.60    2.40
 -19  -9   0   29.40    8.40
 -19  -9   0   24.20    6.10
  19  -9   0   30.10    5.10
  19  -9   0   26.90    2.50
  19  -9   0   26.80    5.10
  19   9   0   18.60    2.60
 -19   9   0   19.90    9.00
 -19   9   0   19.80    2.70
  19   9   0   20.60    7.00
  21  -9   0   97.29    9.80
  21  -9   0  117.29    7.50
 -21  -9   0  100.89   11.80
 -21  -9   0   98.89    7.40
  21  -9   0   98.39   14.00
  21  -9   0  105.19   10.10
 -21  -9   0  115.69   13.60
 -21  -9   0  112.39   11.90
  21   9   0  108.99    7.50
 -21   9   0  108.89    7.60
 -21   9   0   97.69   14.60
  21   9   0  115.99   13.00
 -23  -9   0   26.80    2.50
 -23  -9   0   14.30    6.60
  23  -9   0   22.30    5.10
  23  -9   0   23.20    8.40
  23  -9   0   32.90    2.70
 -23  -9   0   13.70    7.50
 -23  -9   0   18.90    6.80
 -23   9   0   23.70    2.80
  23   9   0   14.90    2.70
  23   9   0   22.50    7.60
 -23   9   0   28.30    9.80
  23   9   0   23.20    2.50
 -25  -9   0   87.79    5.80
 -25  -9   0   88.69   13.20
 -25  -9   0   69.69   11.00
 -25  -9   0   81.69   11.00
  25  -9   0   79.99    5.80
  25  -9   0   82.09   12.90
  25  -9   0   72.39    8.50
 -25   9   0   73.49    6.00
 -25   9   0   65.09   13.80
  25   9   0   77.79    5.90
  25   9   0   85.89    5.80
  25   9   0   79.69   11.80
  27  -9   0   47.60    4.10
  27  -9   0   41.50    7.20
 -27  -9   0   51.79   11.00
 -27  -9   0   54.49    4.00
 -27  -9   0   53.49    9.80
 -27  -9   0   40.70    9.20
 -27   9   0   43.70    4.20
  27   9   0   54.19   11.80
  27   9   0   57.59    4.20
  27   9   0   52.19    4.10
 -27   9   0   38.90    8.80
 -29  -9   0   32.00    3.10
  29  -9   0   38.90    3.20
 -29  -9   0   29.60    8.40
 -29  -9   0   21.80    9.30
  29   9   0   31.90    3.30
  29   9   0   24.70    3.30
 -29   9   0   32.60    3.40
 -31  -9   0   16.40    9.10
  31  -9   0   21.10    2.70
 -31  -9   0   13.50    7.60
 -31   9   0   19.00    2.90
  31   9   0   21.10    3.00
  31   9   0   22.10    2.90
 -33  -9   0   45.90    3.70
 -33  -9   0   32.00    9.70
  33  -9   0   40.20    3.70
 -33  -9   0   28.20   10.90
  33   9   0   37.60    3.90
 -33   9   0   39.70    4.00
  33   9   0   41.00    3.90
 -35  -9   0   60.69    4.50
 -35   9   0   42.20    4.70
  35   9   0   53.89    4.80
  35   9   0   59.79    4.70
  37  -9   0    4.40    2.30
 -37  -9   0    5.30    2.30
  37   9   0    2.00    2.60
 -37   9   0    4.20    2.50
  37   9   0    2.10    2.30
 -39  -9   0    2.70    2.40
  39  -9   0    3.90    2.30
  39   9   0   -1.00    2.70
 -39   9   0    4.10    2.50
  39   9   0    0.20    2.30
  41  -9   0    6.90    2.50
 -41  -9   0    4.00    2.50
  41   9   0   -2.70    2.40
 -41   9   0    6.80    2.80
  41   9   0    1.80    2.80
  43  -9   0    8.40    2.60
 -43  -9   0    9.50    2.70
 -43   9   0    5.40    2.90
 -45  -9   0    7.80    2.80
  45  -9   0    8.40    2.60
 -45   9   0    7.40    3.00
   0 -10   0  164.48   14.70
   0 -10   0  160.48   12.60
   0  10   0  133.79   12.10
   0  10   0  142.19   14.20
   0  10   0  133.79    9.70
  -2 -10   0  171.88   14.30
   2 -10   0  200.68   16.80
   2 -10   0  202.28   14.40
  -2 -10   0  174.18   16.00
   2  10   0  160.88   12.00
  -2  10   0  171.18   13.70
   2  10   0  148.99   13.90
   2  10   0  155.78   15.70
  -2  10   0  170.98   11.70
  -2  10   0  201.38   16.60
  -4 -10   0  450.15   31.80
   4 -10   0  446.06   33.80
   4 -10   0  428.96   30.90
  -4 -10   0  459.45   33.00
   4  10   0  437.96   32.80
   4  10   0  441.86   31.50
  -4  10   0  421.46   29.10
  -4  10   0  450.25   33.70
  -4  10   0  423.96   30.90
   6 -10   0  130.69   13.50
  -6 -10   0  134.99   11.20
  -6 -10   0  124.09    7.50
  -6 -10   0  119.39   12.10
   6 -10   0  117.49    9.80
   6  10   0  112.19   10.80
   6  10   0   97.09    7.70
   6  10   0  107.89   12.00
  -6  10   0   99.99    7.70
  -6  10   0   95.69    9.40
  -6  10   0   99.29   12.80
  -8 -10   0  106.09   10.20
   8 -10   0   85.99    8.60
  -8 -10   0  103.09   11.30
  -8 -10   0   93.89    6.70
   8 -10   0   85.19   12.60
   8  10   0  124.59   11.80
  -8  10   0   85.99    6.90
   8  10   0  125.09   10.80
  -8  10   0   93.29   12.60
   8  10   0  106.99    6.80
  -8  10   0  102.29    9.10
 -10 -10   0  340.97   21.00
  10 -10   0  291.47   22.50
  10 -10   0  302.17   26.40
 -10 -10   0  357.26   24.30
 -10 -10   0  362.76   26.10
  10 -10   0  293.87   21.00
 -10  10   0  302.17   23.10
 -10  10   0  282.17   26.10
  10  10   0  360.16   25.60
 -10  10   0  274.27   21.10
  10  10   0  323.07   21.10
  10  10   0  348.37   24.70
  12 -10   0   60.39    6.80
  12 -10   0   56.09    4.80
  12 -10   0   62.19    8.20
  12 -10   0   69.09   12.00
 -12 -10   0   89.19   10.70
 -12  10   0   65.69   11.80
  12  10   0   96.79    9.80
  12  10   0   70.19    9.60
 -12  10   0   66.89    5.10
  12  10   0   78.69    5.00
 -14 -10   0   93.59    6.50
 -14 -10   0   91.99   10.30
  14 -10   0   95.69    8.60
  14 -10   0  120.59   13.90
 -14 -10   0  110.39   12.90
  14 -10   0   88.89   10.00
  14 -10   0  108.89    6.60
 -14  10   0   97.19   13.40
  14  10   0   86.59    6.60
  14  10   0   89.09   11.10
 -14  10   0   89.19    6.80
  16 -10   0   28.90    4.90
 -16 -10   0   27.20    2.30
  16 -10   0   34.20    9.30
 -16 -10   0   20.80    7.90
  16 -10   0   14.60    6.10
 -16 -10   0   25.50    6.10
 -16 -10   0   29.10    6.70
 -16  10   0   33.80    2.90
  16  10   0   23.80    7.10
  16  10   0   18.10    2.60
 -16  10   0   24.60    9.00
  18 -10   0   58.19   12.00
 -18 -10   0   80.49   11.50
  18 -10   0   56.49    7.60
  18 -10   0   63.19    6.80
 -18 -10   0   81.79    8.80
  18 -10   0   65.09    4.60
 -18 -10   0   71.39    9.40
 -18  10   0   53.99    4.90
  18  10   0   63.29    4.70
 -18  10   0   52.89   12.00
  18  10   0   63.99    9.80
  20 -10   0   14.70    2.30
  20 -10   0   12.70    4.50
 -20 -10   0   13.30    7.10
 -20 -10   0   18.30    5.60
 -20 -10   0   15.60    6.10
  20 -10   0   16.10    7.80
  20 -10   0   14.20    4.30
 -20  10   0   15.80    2.60
  20  10   0   19.30    2.30
  20  10   0   17.40    6.70
 -20  10   0    9.40    8.20
 -22 -10   0  106.69   14.10
 -22 -10   0  110.59   12.40
  22 -10   0  110.19    7.70
  22 -10   0   92.69   10.00
 -22 -10   0  120.19   12.60
  22 -10   0  102.69   14.50
  22 -10   0  108.99   10.20
 -22 -10   0  115.49    7.60
  22  10   0  115.69    7.70
  22  10   0  115.29    7.60
 -22  10   0  106.39    7.80
 -22  10   0   98.99   15.40
  22  10   0  107.19   13.00
 -24 -10   0   40.10    8.30
 -24 -10   0   48.80   10.60
 -24 -10   0   55.69    9.80
 -24 -10   0   55.89    3.80
  24 -10   0   46.30    3.90
  24 -10   0   50.39   11.20
  24 -10   0   42.80    7.00
  24 -10   0   37.60    7.00
 -24  10   0   37.30   10.80
 -24  10   0   38.90    4.10
  24  10   0   48.10    3.90
  24  10   0   52.19    9.90
  24  10   0   51.19    3.90
  26 -10   0   14.60    4.90
 -26 -10   0    4.00    9.00
  26 -10   0   14.90    2.30
  26 -10   0   13.60    5.00
 -26 -10   0   10.60    8.00
 -26 -10   0    6.40    6.00
 -26 -10   0    8.30    2.00
 -26  10   0   16.10    2.40
  26  10   0    4.40    2.00
  26  10   0    9.40    1.90
 -28 -10   0   40.20    9.50
 -28 -10   0   44.80    3.70
 -28 -10   0   37.30   10.70
  28 -10   0   47.10    3.80
 -28  10   0   47.30    4.10
  28  10   0   37.80    3.80
  28  10   0   45.00    3.90
 -30 -10   0   36.20    3.30
  30 -10   0   32.30    3.40
 -30 -10   0   23.60   10.00
 -30 -10   0   33.80    8.80
  30  10   0   37.50    3.50
  30  10   0   33.10    3.50
 -30  10   0   35.30    3.70
 -32 -10   0  105.49    7.20
  32 -10   0   94.99    7.20
 -32 -10   0  118.09   16.70
 -32 -10   0   78.39   13.50
  32  10   0  115.69    7.30
 -32  10   0   90.89    7.50
  32  10   0   97.39    7.40
 -34 -10   0   38.90   10.70
 -34 -10   0   58.79    4.50
  34 -10   0   47.30    4.60
 -34 -10   0   48.50   12.70
 -34  10   0   50.69    4.90
  34  10   0   54.49    4.90
  34  10   0   65.19    4.60
  36 -10   0    8.10    2.40
 -36 -10   0   10.70    2.50
  36  10   0    8.90    2.40
 -36  10   0   12.60    2.80
  36  10   0    9.60    2.70
  38 -10   0    7.00    2.50
 -38 -10   0   10.60    2.50
 -38  10   0    8.10    2.80
  38  10   0    4.60    2.40
  38  10   0    4.80    2.90
 -40 -10   0    3.10    2.50
  40 -10   0    6.00    2.50
 -40  10   0    3.00    2.80
  40  10   0    0.60    2.40
 -42 -10   0   21.50    3.20
  42 -10   0   18.50    3.00
 -42  10   0   18.50    3.40
  44 -10   0    6.80    2.40
 -44 -10   0    6.40    2.70
 -44  10   0    5.90    3.00
   1 -11   0  193.28   15.00
   1 -11   0  204.38   17.70
  -1 -11   0  182.28   14.90
  -1 -11   0  179.48   16.90
  -1  11   0  165.78   12.00
  -1  11   0  178.48   14.50
  -1  11   0  178.78   16.80
   1  11   0  188.58   16.80
   1  11   0  195.18   14.90
   1  11   0  160.28   12.00
  -3 -11   0   53.69    9.40
  -3 -11   0   45.40    7.60
   3 -11   0   42.20    7.10
   3 -11   0   58.49   10.30
  -3  11   0   62.59   10.40
   3  11   0   58.39    7.60
   3  11   0   58.59    4.30
   3  11   0   62.49    9.70
  -3  11   0   58.39    7.20
  -3  11   0   64.49    4.50
   5 -11   0  252.47   19.70
  -5 -11   0  254.57   21.60
  -5 -11   0  264.27   20.50
  -5 -11   0  250.87   17.30
   5 -11   0  263.97   22.80
   5  11   0  279.57   20.50
   5  11   0  277.57   22.10
  -5  11   0  249.58   17.40
  -5  11   0  279.07   22.80
  -5  11   0  264.47   19.60
   5  11   0  251.87   17.30
  -7 -11   0  409.96   27.80
  -7 -11   0  445.96   31.00
  -7 -11   0  439.86   32.10
   7 -11   0  393.76   32.70
   7 -11   0  403.16   29.80
   7 -11   0  384.26   27.80
  -7  11   0  444.36   33.40
   7  11   0  422.76   27.90
  -7  11   0  436.06   30.00
  -7  11   0  397.76   27.90
   7  11   0  473.55   31.10
  -9 -11   0  243.88   21.30
   9 -11   0  256.57   16.70
   9 -11   0  287.57   23.30
   9 -11   0  258.97   18.70
  -9 -11   0  218.38   16.70
  -9 -11   0  240.68   19.80
  -9  11   0  274.17   22.80
   9  11   0  270.47   21.40
   9  11   0  237.08   16.80
  -9  11   0  281.37   19.20
   9  11   0  245.48   20.30
  -9  11   0  248.38   16.80
  11 -11   0   46.00    3.70
 -11 -11   0   40.10    8.60
  11 -11   0   39.40    6.00
  11 -11   0   50.59   10.40
 -11 -11   0   52.59    7.80
 -11 -11   0   53.79    3.60
 -11  11   0   44.20   10.90
 -11  11   0   47.10    6.60
  11  11   0   53.59    8.90
  11  11   0   49.90    3.70
  11  11   0   58.89    8.80
 -11  11   0   44.70    4.00
 -13 -11   0   72.69    5.60
  13 -11   0  109.89   13.50
 -13 -11   0   68.69   11.20
 -13 -11   0   67.89    9.50
  13 -11   0  105.59    8.10
 -13  11   0  121.89   14.00
  13  11   0   78.29    5.70
  13  11   0   74.59   10.60
  13  11   0   80.89   10.20
 -15 -11   0  100.29   13.00
  15 -11   0   99.59    8.60
  15 -11   0  104.39   10.40
  15 -11   0  100.29   13.70
 -15 -11   0   96.19    6.60
 -15 -11   0   88.09   10.80
  15  11   0   88.09   11.00
  15  11   0   87.79    6.70
 -15  11   0   97.59   13.70
 -15  11   0  100.99    6.90
  17 -11   0   32.00    5.50
  17 -11   0   38.40    3.00
 -17 -11   0   38.30    2.90
  17 -11   0   32.20    9.60
 -17 -11   0   36.60    7.20
 -17 -11   0   39.30    9.30
 -17 -11   0   35.70    6.80
  17 -11   0   27.50    6.40
 -17  11   0   32.30    3.40
  17  11   0   29.50    7.60
  17  11   0   34.50    3.20
 -17  11   0   32.40   10.00
 -19 -11   0   93.39   11.70
  19 -11   0   89.49   10.10
 -19 -11   0  110.19   14.20
  19 -11   0  102.19   14.70
  19 -11   0   95.29    9.30
 -19 -11   0   91.49   11.10
 -19 -11   0  107.59    7.20
  19 -11   0  107.29    7.20
  19  11   0  101.79   12.40
 -19  11   0  107.49    7.40
  19  11   0  104.79    7.30
 -19  11   0  117.69   15.60
 -21 -11   0   56.59    3.70
 -21 -11   0   40.80    8.70
  21 -11   0   39.00    3.80
  21 -11   0   29.80    9.90
  21 -11   0   36.40    6.30
 -21 -11   0   46.00    8.70
 -21 -11   0   47.70   10.30
 -21  11   0   37.10    4.20
  21  11   0   55.09   10.10
  21  11   0   54.39    3.80
  21  11   0   53.89    3.90
 -21  11   0   24.70   10.10
  23 -11   0   16.80    2.50
 -23 -11   0   11.80    7.50
 -23 -11   0   19.50    2.30
 -23 -11   0   11.50    6.40
  23 -11   0   13.80    7.80
 -23 -11   0   17.20    6.20
 -23  11   0   24.20   10.20
  23  11   0   17.10    2.60
  23  11   0   20.40    2.20
 -23  11   0   21.50    2.70
  23  11   0   20.90    7.60
 -25 -11   0   10.20    8.00
 -25 -11   0   22.00    2.40
 -25 -11   0   17.20    6.20
  25  11   0   17.40    2.70
  25  11   0   26.00    2.60
 -27 -11   0   24.60    2.60
  27 -11   0   17.50    2.60
 -27 -11   0   23.40    7.50
 -27 -11   0   16.50    8.60
  27  11   0   19.60    2.70
  27  11   0   19.40    2.70
 -27  11   0   18.10    2.80
 -29 -11   0   11.60    8.40
 -29 -11   0   12.10    7.00
  29 -11   0   14.00    2.60
  29  11   0   20.20    2.70
  29  11   0   21.40    2.80
 -29  11   0   11.30    2.70
 -31 -11   0    4.50    8.40
 -31 -11   0   18.50    2.70
 -31 -11   0    7.50    7.20
  31  11   0   11.50    2.50
  31  11   0   16.80    2.80
 -31  11   0   26.30    3.20
 -33 -11   0   25.60    2.90
  33 -11   0   20.40    3.00
 -33 -11   0   20.60    8.70
 -33 -11   0   18.00    9.80
 -33  11   0   20.90    3.40
  33  11   0   25.40    3.10
  33  11   0   19.60    3.30
  35 -11   0   19.50    2.90
 -35 -11   0   21.60    2.80
  35  11   0   18.80    3.10
 -35  11   0   20.20    3.20
  37 -11   0   16.70    2.70
 -37 -11   0   16.80    2.90
 -37  11   0   16.00    3.10
  37  11   0   17.20    2.80
 -39 -11   0    8.40    2.50
  39 -11   0    6.90    2.30
 -39  11   0    8.60    2.90
  39  11   0    2.40    2.50
  41 -11   0   11.70    2.70
 -41 -11   0   16.90    2.90
 -41  11   0    9.80    3.00
 -43 -11   0    7.60    2.70
  43 -11   0    7.20    2.50
 -43  11   0    7.00    3.00
   0 -12   0   72.19   12.20
   0 -12   0   63.29    9.10
   0  12   0  102.99   12.40
   0  12   0   93.29    6.30
   0  12   0  103.29    9.80
   2 -12   0  153.98   15.00
   2 -12   0  146.99   12.10
  -2 -12   0  147.99   14.50
  -2 -12   0  149.09   12.30
   2  12   0  125.59   13.70
  -2  12   0  111.69    8.50
   2  12   0  116.79   11.70
  -2  12   0  111.79   11.10
  -2  12   0  115.69   14.20
   2  12   0  110.69    8.50
   4 -12   0  218.88   20.80
  -4 -12   0  234.08   20.30
  -4 -12   0  224.68   15.00
   4 -12   0  218.78   18.00
  -4 -12   0  224.28   18.50
  -4  12   0  245.38   20.80
  -4  12   0  225.98   17.80
   4  12   0  246.88   20.20
   4  12   0  209.68   15.10
   4  12   0  226.78   18.20
  -4  12   0  224.38   15.10
  -6 -12   0   88.19    9.90
  -6 -12   0   79.39    5.80
   6 -12   0  102.59   13.30
   6 -12   0   81.99    5.80
  -6 -12   0   73.99   11.20
   6 -12   0   91.99    9.30
  -6  12   0   95.19    6.10
   6  12   0   79.69   11.50
   6  12   0   87.59   10.10
  -6  12   0   94.69    9.00
   6  12   0   67.39    5.90
  -6  12   0   97.59   12.80
   8 -12   0   22.00    5.30
  -8 -12   0   34.80    6.40
  -8 -12   0   27.40    7.20
  -8 -12   0   29.50    2.30
   8 -12   0   12.10    7.30
   8 -12   0   17.50    2.30
   8  12   0   21.00    6.60
  -8  12   0   11.40    7.60
  -8  12   0   22.30    5.30
   8  12   0   43.60    7.40
   8  12   0   28.60    2.60
  -8  12   0   18.40    2.70
  10 -12   0   92.19    8.60
 -10 -12   0   74.79    9.50
 -10 -12   0   65.99   11.10
 -10 -12   0   75.69    5.80
  10 -12   0   96.59    5.90
  10 -12   0   84.79   13.30
  10  12   0   55.29   10.60
  10  12   0   65.69    9.80
 -10  12   0   88.09    8.90
 -10  12   0   93.49   13.20
 -10  12   0   91.69    6.20
  12 -12   0  127.19   14.70
  12 -12   0  108.39    9.10
 -12 -12   0   90.59   10.90
 -12 -12   0   92.89    6.50
 -12 -12   0   88.29   12.30
 -12  12   0  135.29   15.00
  12  12   0   90.99   11.20
  12  12   0   88.69    6.60
  12  12   0   74.49   11.80
 -14 -12   0   37.30    9.20
  14 -12   0   46.40    8.10
 -14 -12   0   50.29    8.20
  14 -12   0   49.50    3.70
 -14 -12   0   53.69    3.60
  14 -12   0   40.30   10.60
  14 -12   0   33.00    5.80
  14  12   0   32.90    8.30
  14  12   0   62.09    9.50
 -14  12   0   35.80   10.50
 -14  12   0   46.10    4.10
  14  12   0   48.40    3.80
  16 -12   0   29.30    9.70
 -16 -12   0   44.40    9.90
  16 -12   0   35.00    7.10
  16 -12   0   34.10    3.30
 -16 -12   0   63.79    8.80
  16 -12   0   34.20    5.80
 -16 -12   0   58.89    8.20
  16  12   0   51.49    9.00
 -16  12   0   32.70    3.60
 -16  12   0   20.80    9.40
  16  12   0   46.10    3.40
 -18 -12   0   40.60    7.90
  18 -12   0   46.90   11.50
 -18 -12   0   49.60   10.50
  18 -12   0   29.70    5.80
 -18 -12   0   41.60    3.50
  18 -12   0   46.80    3.60
  18 -12   0   32.90    7.00
 -18 -12   0   32.50    8.00
  18  12   0   50.09    3.70
  18  12   0   48.00    9.00
 -18  12   0   43.10   11.20
 -18  12   0   46.00    3.90
  20 -12   0   52.79   12.10
 -20 -12   0   38.90   10.00
  20 -12   0   45.90    7.50
 -20 -12   0   52.19    8.50
 -20 -12   0   47.50    9.10
 -20 -12   0   56.69    3.90
  20 -12   0   43.40    4.00
  20  12   0   54.39    4.10
 -20  12   0   37.00   11.20
 -20  12   0   50.79    4.30
  20  12   0   47.00    9.40
 -22 -12   0   35.90   10.20
 -22 -12   0   26.90    7.90
 -22 -12   0   32.70    7.80
  22 -12   0   39.20   11.60
 -22 -12   0   36.40    3.30
  22 -12   0   36.10    3.40
  22  12   0   49.70   10.90
  22  12   0   41.30    3.50
  22  12   0   40.80    3.20
 -22  12   0   39.60    3.80
 -22  12   0   34.60   11.60
  24 -12   0   12.60    2.20
 -24 -12   0    6.10    7.20
 -24 -12   0    8.70    5.80
 -24 -12   0   11.00    2.10
  24  12   0   10.80    2.20
 -24  12   0   18.60    2.70
  24  12   0   11.20    1.80
 -26 -12   0   33.00    2.80
  26 -12   0   26.10    3.00
 -26 -12   0   18.70    9.20
 -26 -12   0   23.50    7.50
  26  12   0   27.00    3.10
 -26  12   0   26.20    3.60
  26  12   0   28.60    3.00
 -28 -12   0   45.70    9.70
  28 -12   0   58.69    4.40
 -28 -12   0   50.99    4.20
 -28 -12   0   32.50   10.80
 -28  12   0   54.99    4.70
  28  12   0   50.79    4.40
  28  12   0   48.60    4.40
 -30 -12   0    3.30    8.70
 -30 -12   0    9.70    6.90
  30 -12   0   16.30    2.70
 -30 -12   0   14.80    2.60
  30  12   0   12.50    2.40
 -30  12   0   15.40    3.00
  32 -12   0   13.40    2.60
 -32 -12   0   11.80    7.70
 -32 -12   0   10.00    9.00
 -32 -12   0   16.80    2.60
  32  12   0    9.00    2.50
 -32  12   0   16.80    3.00
  34 -12   0   29.30    3.40
 -34 -12   0   33.90    3.40
 -34  12   0   26.10    3.90
  34  12   0   39.90    3.70
 -36 -12   0   35.00    3.60
  36 -12   0   40.80    3.80
  36  12   0   37.00    3.80
 -36  12   0   41.50    4.30
  38 -12   0   20.10    2.90
 -38 -12   0   19.60    3.00
  38  12   0    8.90    2.70
 -38  12   0   15.00    3.30
  40 -12   0   11.80    2.60
 -40 -12   0   19.70    3.00
  40  12   0    8.80    3.00
 -40  12   0    9.40    3.20
  42 -12   0   15.50    2.90
 -42 -12   0   19.50    3.10
 -42  12   0   13.50    3.40
  -1 -13   0  149.29   15.70
  -1 -13   0  129.09    9.30
   1 -13   0  148.29   15.90
   1 -13   0  141.79   12.80
   1 -13   0  137.69    9.40
  -1 -13   0  125.89   12.70
   1  13   0  133.49   12.80
  -1  13   0  142.79    9.40
  -1  13   0  154.48   15.60
   1  13   0  154.48   15.50
   1  13   0  131.79    9.40
  -1  13   0  129.39   12.40
   3 -13   0  155.68   16.10
  -3 -13   0  126.89   13.10
   3 -13   0  141.99    9.30
   3 -13   0  144.69   12.90
  -3 -13   0  155.68   15.90
  -3 -13   0  137.89    9.20
   3  13   0  138.69   13.00
  -3  13   0  130.59    9.40
  -3  13   0  139.59   15.30
   3  13   0  135.99   15.20
  -3  13   0  144.99   12.60
   3  13   0  117.49    9.30
   5 -13   0  238.58   22.30
   5 -13   0  227.88   19.10
  -5 -13   0  244.78   16.10
  -5 -13   0  276.77   20.00
  -5 -13   0  237.68   21.60
   5 -13   0  223.58   16.10
   5  13   0  248.28   16.20
   5  13   0  253.77   19.70
  -5  13   0  224.78   16.20
   5  13   0  262.07   21.70
  -5  13   0  249.58   19.00
  -5  13   0  235.98   21.80
  -7 -13   0    6.50    6.60
   7 -13   0   10.00    4.80
   7 -13   0   14.90    1.90
  -7 -13   0    9.00    1.70
   7 -13   0   15.10    7.80
  -7 -13   0   13.70    5.40
   7  13   0    6.90    6.20
   7  13   0    8.20    5.00
   7  13   0    9.70    2.10
  -7  13   0   14.10    7.70
  -7  13   0   13.20    4.80
  -7  13   0   14.40    2.40
   9 -13   0   38.20    6.60
   9 -13   0   39.00   10.10
  -9 -13   0   40.20    8.80
  -9 -13   0   48.60    3.50
   9 -13   0   44.70    3.50
  -9 -13   0   35.50    7.50
  -9  13   0   45.40    3.90
  -9  13   0   36.00   10.50
   9  13   0   43.60    9.20
   9  13   0   49.00    8.70
  -9  13   0   51.89    7.20
   9  13   0   46.20    3.70
  11 -13   0  103.09   10.00
 -11 -13   0   98.59   11.10
  11 -13   0  117.69    7.10
 -11 -13   0   96.79    7.10
  11 -13   0  103.69   14.40
 -11 -13   0  105.39   13.20
  11  13   0   92.79   12.20
 -11  13   0  104.09    7.40
 -11  13   0  105.29   14.50
 -11  13   0  110.49   10.40
  11  13   0   97.09    7.20
  11  13   0   89.89   11.20
  13 -13   0  430.26   28.40
 -13 -13   0  449.66   28.30
  13 -13   0  397.26   30.30
 -13 -13   0  428.16   33.90
 -13 -13   0  392.76   31.80
  13 -13   0  431.26   35.20
  13 -13   0  443.76   32.00
  13  13   0  447.96   33.70
  13  13   0  451.45   32.70
 -13  13   0  411.96   28.50
 -13  13   0  403.56   34.80
  13  13   0  430.96   28.40
  15 -13   0   86.29    6.00
  15 -13   0   84.19   13.80
 -15 -13   0   85.79   12.60
  15 -13   0   86.79   10.30
 -15 -13   0   88.79    5.90
 -15 -13   0   75.99   10.60
  15 -13   0   64.39    8.30
  15  13   0   85.69    6.00
  15  13   0   86.59   11.20
 -15  13   0   78.89    6.30
  15  13   0   79.89   12.00
 -15  13   0   76.99   14.50
 -17 -13   0   53.89    3.70
 -17 -13   0   51.89   10.60
 -17 -13   0   46.00    8.80
  17 -13   0   33.30    6.10
  17 -13   0   40.00    8.10
 -17 -13   0   48.20    8.20
  17 -13   0   43.80    3.80
  17 -13   0   41.90   10.90
 -17  13   0   39.30   11.30
 -17  13   0   43.30    4.20
  17  13   0   50.59    9.70
  17  13   0   51.39    3.90
 -19 -13   0   89.69   13.70
 -19 -13   0   96.49   11.60
  19 -13   0   88.19    9.40
  19 -13   0  112.99   15.40
 -19 -13   0   92.99    7.00
 -19 -13   0   83.79   11.80
  19 -13   0  109.09    7.10
  19 -13   0  102.39   11.00
  19  13   0  100.19    7.20
 -19  13   0  102.19   15.70
  19  13   0   97.39   12.90
 -19  13   0  112.79    7.40
 -21 -13   0   12.70    7.90
 -21 -13   0   13.20    2.20
 -21 -13   0   12.40    5.60
  21 -13   0   16.90    2.50
 -21  13   0   21.60    2.90
  21  13   0   16.40    2.00
 -21  13   0   18.10   10.50
  21  13   0   15.80    2.40
 -23 -13   0   30.70    3.00
  23 -13   0   31.10    3.20
 -23 -13   0   28.10    7.50
 -23 -13   0   22.00    9.10
 -23  13   0   34.30    3.70
  23  13   0   36.30    3.00
  23  13   0   34.30    3.30
 -25 -13   0   51.39    3.80
 -25 -13   0   47.70    9.60
 -25 -13   0   42.60   11.20
  25 -13   0   41.00    4.00
 -25  13   0   44.40    4.30
  25  13   0   49.90    4.10
 -27 -13   0    8.30    6.40
 -27 -13   0    2.50    7.70
  27 -13   0   11.60    2.40
 -27 -13   0   21.20    2.40
 -27  13   0   13.60    2.90
  27  13   0   15.10    2.50
 -29 -13   0   19.80   10.20
 -29 -13   0   23.70    8.00
 -29 -13   0   36.00    3.10
  29 -13   0   27.00    3.20
  29  13   0   31.80    3.40
 -29  13   0   27.20    3.70
 -31 -13   0   14.90   12.80
  31 -13   0   23.80    3.40
 -31 -13   0   25.40    8.70
 -31 -13   0   38.10    3.30
 -31  13   0   28.00    4.00
  31  13   0   39.80    3.50
  33 -13   0   17.00    3.00
 -33 -13   0   25.10    3.00
 -33  13   0   20.70    3.50
  33  13   0   23.90    3.20
  35 -13   0   19.80    2.90
 -35 -13   0   19.40    2.80
 -35  13   0   14.30    3.30
  35  13   0   13.80    2.80
 -37 -13   0   25.10    3.20
  37 -13   0   28.00    3.20
  37  13   0   25.20    3.40
 -37  13   0   19.70    3.70
 -39 -13   0   21.70    3.20
  39 -13   0   19.40    3.00
  39  13   0   21.70    3.30
 -39  13   0   17.60    3.60
 -41 -13   0   18.60    3.20
  41 -13   0   12.10    2.70
 -41  13   0    8.90    3.40
 -43 -13   0    4.00    2.60
   0 -14   0  388.26   32.10
   0 -14   0  390.56   26.50
   0 -14   0  376.86   29.90
   0  14   0  416.26   30.00
   0  14   0  432.66   32.50
   0  14   0  401.96   26.60
  -2 -14   0  181.58   12.60
   2 -14   0  191.68   12.60
  -2 -14   0  206.28   19.20
   2 -14   0  188.98   12.60
   2 -14   0  210.98   19.30
  -2 -14   0  172.28   16.50
   2 -14   0  188.68   16.20
  -2  14   0  181.48   12.70
   2  14   0  211.58   19.10
  -2  14   0  197.08   16.30
   2  14   0  176.18   12.70
   2  14   0  188.38   16.30
  -2  14   0  189.58   18.70
  -4 -14   0   15.80    6.00
  -4 -14   0    2.60    6.90
   4 -14   0   13.50    5.30
   4 -14   0   12.30    8.10
   4 -14   0   15.50    2.00
  -4 -14   0   14.30    2.00
   4  14   0   21.90    6.20
  -4  14   0   21.50    5.70
   4  14   0   19.00    2.40
   4  14   0   10.00    6.80
  -4  14   0   16.50    2.60
  -4  14   0   20.90    7.70
   6 -14   0   91.79   10.30
   6 -14   0   93.39   13.90
   6 -14   0   94.09    6.70
  -6 -14   0   85.09   10.50
  -6 -14   0   99.29   13.10
   6  14   0   98.89   11.00
  -6  14   0   98.59   13.70
  -6  14   0   99.09    6.90
   6  14   0   93.59    6.80
  -6  14   0  101.29   10.30
   6  14   0  102.89   13.00
   8 -14   0   15.40    2.10
  -8 -14   0   15.10    5.60
  -8 -14   0   17.20    7.40
  -8 -14   0   21.70    2.10
   8 -14   0   10.10    7.90
   8 -14   0   13.10    5.10
  -8  14   0   17.80    5.40
   8  14   0   17.60    7.30
  -8  14   0   22.10    8.60
   8  14   0   23.50    6.80
  -8  14   0   17.50    2.60
   8  14   0   17.40    2.40
 -10 -14   0  130.69   13.20
  10 -14   0  122.99   12.00
  10 -14   0  130.49   16.20
 -10 -14   0  122.09   14.70
 -10 -14   0  117.39    8.70
  10 -14   0  124.39    8.70
  10  14   0  132.59   14.70
  10  14   0  126.19   13.20
 -10  14   0  133.19   16.30
  10  14   0  135.09    8.80
 -10  14   0  131.19   12.10
 -10  14   0  129.29    8.90
 -12 -14   0   44.80    8.50
  12 -14   0   26.60    2.70
  12 -14   0   23.60    5.70
  12 -14   0   25.80    9.40
 -12 -14   0   37.20    9.50
  12  14   0   48.80    8.70
 -12  14   0   15.40    8.90
 -12  14   0   26.70    3.30
 -12  14   0   26.10    6.60
  12  14   0   32.80    8.20
  14 -14   0  130.99   11.60
 -14 -14   0  127.29   13.30
  14 -14   0  120.39    8.70
 -14 -14   0  129.79    8.70
 -14 -14   0  146.39   15.70
  14 -14   0  138.39   13.40
  14 -14   0  134.19   16.80
 -14  14   0   99.19   15.70
  14  14   0  140.19   13.80
  14  14   0  141.29   15.20
 -14  14   0  112.79    9.00
  14  14   0  133.09    8.80
  16 -14   0   14.20    6.40
 -16 -14   0   28.60    7.30
 -16 -14   0   26.20    8.60
  16 -14   0   22.90    5.20
  16 -14   0   17.50    2.40
  16 -14   0   22.20    9.80
  16  14   0   16.90    7.60
  16  14   0   43.70    8.90
 -16  14   0    4.10    8.50
 -16  14   0   19.90    3.10
 -18 -14   0   38.90    3.30
  18 -14   0   42.60    3.50
  18 -14   0   41.80    8.00
  18 -14   0   43.80   11.70
 -18 -14   0   37.20    8.60
 -18 -14   0   33.30    9.70
  18 -14   0   47.40    6.90
 -18 -14   0   33.20    7.80
  18  14   0   42.00    9.00
 -18  14   0   29.00   10.90
 -18  14   0   40.20    4.00
  18  14   0   37.80    3.50
  20 -14   0   31.60    3.30
 -20 -14   0   40.70    8.30
 -20 -14   0   39.90    3.20
 -20 -14   0   38.90   10.60
  20  14   0   39.50    3.50
 -20  14   0   28.10    3.80
 -22 -14   0   14.60    6.40
 -22 -14   0   25.10    2.60
 -22 -14   0   26.40    9.50
  22 -14   0   19.90    2.70
 -22  14   0   22.00    3.30
  22  14   0   20.70    2.80
 -24 -14   0    6.60    1.90
 -24 -14   0    4.20    8.10
  24 -14   0    2.10    2.30
 -24 -14   0    5.40    5.40
  24  14   0    9.20    2.20
 -24  14   0    7.70    2.70
  26 -14   0   15.90    2.70
 -26 -14   0   19.60    2.40
 -26 -14   0   11.60    8.90
 -26 -14   0   16.30    7.10
  26  14   0   17.20    2.70
 -26  14   0   16.10    2.90
 -28 -14   0   53.29   13.00
  28 -14   0   64.69    5.10
 -28 -14   0   69.19    5.10
 -28 -14   0   59.49   11.20
  28  14   0   68.59    5.20
 -28  14   0   56.19    5.40
  30 -14   0    4.90    2.40
 -30 -14   0    5.80    2.10
 -30  14   0    4.10    2.80
  30  14   0    3.40    2.30
  32 -14   0   12.80    2.70
 -32 -14   0   17.30    2.70
  32  14   0   17.00    2.70
 -32  14   0   11.60    3.10
  34 -14   0   14.30    2.80
 -34 -14   0   24.00    2.90
  34  14   0   16.50    2.80
 -34  14   0   13.20    3.30
  36 -14   0   26.30    3.40
 -36 -14   0   29.80    3.20
 -36  14   0   19.20    3.70
  36  14   0   31.30    3.60
  38 -14   0   10.20    2.80
 -38 -14   0   18.70    2.90
  38  14   0   14.10    2.80
 -38  14   0    9.10    3.30
 -40 -14   0    6.80    2.60
  40 -14   0    4.00    2.60
 -40  14   0    4.90    3.20
   1 -15   0   44.60    8.40
  -1 -15   0   30.10    9.80
   1 -15   0   40.60   10.30
  -1 -15   0   29.80    3.00
   1 -15   0   40.70    3.00
  -1 -15   0   37.50    3.00
  -1 -15   0   36.20    7.60
   1 -15   0   36.00    3.00
   1  15   0   25.80    3.30
   1  15   0   34.80    9.10
   1  15   0   40.50    7.70
  -1  15   0   27.30    3.30
  -1  15   0   39.70    7.80
  -1  15   0   25.90    8.90
  -3 -15   0   62.99    4.50
   3 -15   0   58.09    4.50
  -3 -15   0   70.29    9.40
   3 -15   0   60.39    8.70
   3 -15   0   50.79   11.90
   3 -15   0   55.59    4.50
  -3 -15   0   64.49   11.60
  -3  15   0   57.49   11.30
  -3  15   0   60.79    8.70
  -3  15   0   58.79    4.80
   3  15   0   66.69    4.70
   3  15   0   76.99   11.60
   3  15   0   65.89    9.10
   5 -15   0   50.89   11.30
  -5 -15   0   42.20    7.90
   5 -15   0   44.80    3.40
  -5 -15   0   42.90    3.40
   5 -15   0   46.50    3.40
   5 -15   0   40.50    7.30
  -5 -15   0   45.90   10.30
   5  15   0   34.20    9.10
  -5  15   0   39.60    3.80
  -5  15   0   35.30    9.50
   5  15   0   37.40    3.70
   5  15   0   41.80    8.40
  -5  15   0   42.80    7.80
  -7 -15   0   35.60    9.20
   7 -15   0   13.20    8.40
   7 -15   0   14.30    2.10
  -7 -15   0   26.30    6.40
   7 -15   0   13.70    5.70
   7  15   0   25.10    8.20
  -7  15   0   10.60    5.20
  -7  15   0   13.80    2.60
   7  15   0   35.80    7.90
  -7  15   0    8.60    7.40
  -9 -15   0   29.10    2.60
   9 -15   0   25.00    6.30
   9 -15   0   24.70    2.70
  -9 -15   0   19.50    6.80
  -9 -15   0   24.90    8.30
   9 -15   0   25.10    9.40
   9  15   0   34.40    7.90
  -9  15   0   31.90    3.30
  -9  15   0   29.90    7.00
   9  15   0   28.70    2.90
  -9  15   0   24.60    9.50
   9  15   0   23.60    8.10
  11 -15   0   84.99   14.20
 -11 -15   0   81.59   11.00
  11 -15   0   78.49    9.50
  11 -15   0   94.79    6.10
 -11 -15   0   79.69   12.60
 -11 -15   0   78.29    6.00
  11  15   0   83.49   12.40
 -11  15   0   90.79    6.40
  11  15   0   84.99   11.40
 -11  15   0   78.79   13.80
  11  15   0   83.29    6.20
 -11  15   0   94.09   10.20
  13 -15   0   88.19    9.80
  13 -15   0   83.69   14.20
 -13 -15   0   86.99   13.00
 -13 -15   0   74.59   10.80
  13 -15   0   90.69    6.10
 -13 -15   0   83.79    6.00
 -13  15   0   82.09   14.60
 -13  15   0   84.89    6.40
  13  15   0   76.89   11.40
  13  15   0   83.29   12.60
  13  15   0   80.59    6.10
  15 -15   0   32.00   10.80
 -15 -15   0    7.80    6.10
  15 -15   0   24.20    5.60
  15 -15   0   24.40    7.20
  15 -15   0   24.90    2.60
 -15 -15   0   17.90    2.40
 -15 -15   0   21.40    8.20
 -15  15   0   25.40    3.20
  15  15   0   14.20    7.50
 -15  15   0   20.50    9.50
  15  15   0   11.80    6.30
  15  15   0   17.50    2.80
  17 -15   0   45.20    7.50
  17 -15   0   50.99   13.00
  17 -15   0   56.29    4.20
  17 -15   0   41.00    8.60
 -17 -15   0   42.10   11.40
 -17 -15   0   52.49    4.00
 -17  15   0   50.09    4.60
  17  15   0   51.79    4.20
 -17  15   0   48.20   12.60
 -19 -15   0   35.10   10.10
  19 -15   0   49.99    3.90
 -19 -15   0   46.10    3.80
 -19 -15   0   32.70    8.10
  19  15   0   37.60    3.90
 -19  15   0   53.09    4.40
 -21 -15   0    6.60    5.40
 -21 -15   0   18.00    2.40
 -21 -15   0   13.70    8.50
  21 -15   0   15.60    2.60
 -21  15   0   17.10    3.00
  21  15   0   16.40    2.70
  23 -15   0    0.90    2.10
 -23 -15   0    6.60    1.90
 -23 -15   0    3.10    5.20
 -23 -15   0    5.50    8.20
  23  15   0    3.60    2.20
 -23  15   0    2.60    2.70
 -25 -15   0   22.80    7.30
 -25 -15   0   29.90   10.90
 -25 -15   0   34.20    3.00
  25 -15   0   21.90    3.20
 -25  15   0   27.30    3.70
  25  15   0   36.70    3.30
 -27 -15   0   12.40    6.80
 -27 -15   0   19.70   11.40
  27 -15   0   14.40    2.70
 -27 -15   0   20.30    2.50
 -27  15   0   12.10    3.20
  27  15   0   19.10    2.90
 -29 -15   0    9.00    2.20
  29 -15   0   13.00    2.60
  29  15   0   11.00    2.50
 -29  15   0    9.80    3.00
  31 -15   0   18.40    3.10
 -31 -15   0   19.00    2.90
 -31  15   0   14.00    3.20
  31  15   0   24.30    3.10
 -33 -15   0   14.90    2.70
  33 -15   0   13.60    2.80
 -33  15   0   10.40    3.10
  33  15   0   15.30    2.70
  35 -15   0   11.30    2.80
 -35  15   0    6.20    3.10
  35  15   0    7.30    2.50
 -37 -15   0   15.80    2.80
  37 -15   0   16.70    3.10
 -37  15   0   11.10    3.40
  37  15   0    9.60    2.90
 -39 -15   0    4.10    2.60
  39 -15   0    8.40    2.70
 -39  15   0    6.10    3.20
   0 -16   0   91.19   10.80
   0 -16   0   84.69    6.10
   0 -16   0   80.79   13.90
   0 -16   0   91.39    6.10
   0  16   0   83.69   13.30
   0  16   0   80.29   10.30
   0  16   0   80.29    6.30
   2 -16   0   40.90    8.10
   2 -16   0   46.30    3.20
   2 -16   0   42.00   10.80
  -2 -16   0   29.00   10.30
  -2 -16   0   32.30    3.10
  -2 -16   0   30.70    3.20
  -2 -16   0   27.30    7.20
   2 -16   0   43.90    3.30
  -2  16   0   44.80    8.10
  -2  16   0   43.10    3.60
   2  16   0   35.40    7.50
   2  16   0   24.90    8.90
   2  16   0   29.90    3.50
  -2  16   0   35.60   10.10
  -4 -16   0  132.29    9.00
  -4 -16   0  125.59   13.10
   4 -16   0  123.69   12.90
   4 -16   0  127.69   16.50
  -4 -16   0  146.59   16.40
   4 -16   0  125.99    9.00
   4 -16   0  121.99    9.00
  -4 -16   0  135.89    9.00
   4  16   0  143.69   13.50
   4  16   0  149.29   16.70
  -4  16   0  136.29   13.00
   4  16   0  135.59    9.20
  -4  16   0  142.39   16.50
  -4  16   0  129.89    9.20
   6 -16   0   56.29    8.80
  -6 -16   0   69.59    4.70
  -6 -16   0   62.09   12.10
  -6 -16   0   70.99    9.40
   6 -16   0   57.99    4.70
   6 -16   0   72.59   13.70
   6 -16   0   63.39    4.70
   6  16   0   71.19    4.90
  -6  16   0   62.19    8.90
  -6  16   0   57.99    5.10
  -6  16   0   54.89   12.00
   6  16   0   65.29   12.00
   6  16   0   61.89    9.90
   8 -16   0   55.29    4.70
   8 -16   0   56.99    8.50
  -8 -16   0   66.59    4.70
  -8 -16   0   67.89   12.50
   8 -16   0   62.99    4.70
  -8 -16   0   61.49    9.80
   8 -16   0   54.99   12.40
   8  16   0   68.79    4.90
  -8  16   0   62.79    9.10
   8  16   0   67.19   10.00
  -8  16   0   64.69    5.10
  -8  16   0   72.79   12.90
   8  16   0   67.29   12.10
  10 -16   0   41.60    3.70
 -10 -16   0   43.60    3.60
  10 -16   0   43.30    8.10
 -10 -16   0   40.70   10.20
  10 -16   0   45.20   11.60
 -10 -16   0   37.50    8.40
  10  16   0   47.50    3.90
 -10  16   0   55.59    4.40
  10  16   0   51.29    9.40
  10  16   0   35.40    9.50
 -10  16   0   54.39    8.60
 -10  16   0   38.10   11.20
  12 -16   0   19.10    9.70
 -12 -16   0   21.80    2.50
 -12 -16   0   15.80    6.80
 -12 -16   0   25.50    8.70
  12 -16   0   22.50    6.20
  12 -16   0   22.50    2.60
 -12  16   0   23.10    6.50
  12  16   0   14.30    7.40
  12  16   0   24.60    7.70
 -12  16   0   11.40    9.00
  12  16   0   20.60    2.70
 -12  16   0   20.40    3.30
  14 -16   0   41.00   12.20
 -14 -16   0   47.30    9.60
  14 -16   0   54.59    4.30
 -14 -16   0   54.59    4.10
 -14 -16   0   50.09   11.50
  14 -16   0   54.59    8.50
 -14  16   0   40.00   12.10
  14  16   0   51.69    4.40
  14  16   0   59.19   10.20
 -14  16   0   51.89    4.60
  14  16   0   48.50   10.90
 -16 -16   0   12.10    8.10
  16 -16   0   17.80    7.40
 -16 -16   0   20.70    2.30
  16 -16   0   11.30    5.40
  16 -16   0   15.10    2.50
 -16  16   0   21.40    3.10
  16  16   0   18.60    2.70
  16  16   0   10.70    7.50
 -18 -16   0   -2.30    6.60
  18 -16   0    5.60    2.10
 -18 -16   0    5.90    1.80
  18  16   0    7.70    2.30
 -18  16   0    4.80    2.70
 -20 -16   0   16.00    6.70
  20 -16   0   19.40    2.70
 -20 -16   0   19.50    2.50
 -20 -16   0   17.60    9.10
  20  16   0   18.40    3.00
 -20  16   0   23.80    3.40
 -22 -16   0   39.40    3.20
 -22 -16   0   24.90   10.40
 -22 -16   0   21.00    7.50
  22 -16   0   29.20    3.40
 -22  16   0   27.50    4.00
  22  16   0   35.60    3.60
  24 -16   0   -0.30    2.40
 -24 -16   0    5.60    8.00
 -24 -16   0    4.50    5.40
 -24 -16   0    7.50    1.90
 -24  16   0    3.70    2.90
  24  16   0    5.70    2.30
  26 -16   0    1.10    2.30
 -26 -16   0    2.30    1.90
 -26  16   0    3.70    2.90
  26  16   0    2.70    2.30
  28 -16   0   22.60    3.10
 -28 -16   0   21.50    2.90
 -28  16   0   21.40    3.50
  28  16   0   23.30    3.20
  30 -16   0    2.80    2.50
 -30 -16   0    3.50    2.10
 -30  16   0    0.50    2.90
  30  16   0    1.10    2.40
  32 -16   0   13.50    2.70
 -32 -16   0   11.30    2.50
  32  16   0   13.50    2.70
 -32  16   0   11.60    3.30
 -34 -16   0   25.70    3.20
  34 -16   0   22.70    3.20
 -34  16   0   20.90    3.80
  34  16   0   29.00    3.50
  36 -16   0    9.90    2.60
 -36 -16   0    7.10    2.50
 -36  16   0   11.00    3.30
  36  16   0    4.70    2.60
 -38 -16   0    3.20    2.40
  38 -16   0    4.70    2.60
  38  16   0    3.30    3.70
 -38  16   0    2.60    3.30
  -1 -17   0   76.09    5.30
  -1 -17   0   71.49   10.30
   1 -17   0   74.59    5.30
   1 -17   0   73.49    5.30
  -1 -17   0   73.29   13.80
  -1 -17   0   76.79    5.30
   1 -17   0   72.89   13.70
   1 -17   0   65.19   10.30
  -1  17   0   64.69    5.60
  -1  17   0   54.59   12.00
   1  17   0   71.69    5.60
   1  17   0   79.89   10.60
  -1  17   0   61.79    9.80
   1  17   0   73.89   12.80
   3 -17   0   44.60    3.70
   3 -17   0   50.19   12.20
  -3 -17   0   48.70    3.70
  -3 -17   0   45.50    3.60
  -3 -17   0   39.70    8.40
   3 -17   0   40.50    3.60
   3 -17   0   34.90    8.20
  -3 -17   0   63.59   12.60
  -3  17   0   35.60   10.50
  -3  17   0   38.30    4.00
   3  17   0   48.90    4.00
   3  17   0   50.69    8.90
  -3  17   0   44.60    8.50
   3  17   0   34.80    9.70
   5 -17   0   27.60    2.80
  -5 -17   0   25.50    9.80
   5 -17   0   32.80    7.80
  -5 -17   0   30.10    2.80
   5 -17   0   31.40    2.90
  -5 -17   0   21.70    6.50
  -5 -17   0   32.90    2.90
   5 -17   0   25.80   10.40
   5  17   0   30.70    7.60
  -5  17   0   25.30    3.30
   5  17   0   27.00    3.20
   5  17   0   28.40    9.10
  -5  17   0   30.70    7.60
  -5  17   0   22.00    9.10
   7 -17   0   64.19   13.60
   7 -17   0   44.10    8.40
   7 -17   0   40.00    3.60
  -7 -17   0   50.79    3.70
  -7 -17   0   45.00    3.60
  -7 -17   0   46.20   11.20
  -7 -17   0   37.00    8.70
   7 -17   0   43.40    3.70
   7  17   0   44.80    4.00
  -7  17   0   49.99    9.00
   7  17   0   40.90    8.90
  -7  17   0   40.10   10.90
   7  17   0   24.80    9.20
  -7  17   0   42.00    4.10
  -9 -17   0   23.00    2.60
   9 -17   0   33.20    7.30
  -9 -17   0   21.40    7.20
  -9 -17   0   23.50    9.60
   9 -17   0   35.70   11.20
  -9 -17   0   22.50    2.50
  -9  17   0   39.60    8.20
  -9  17   0   26.40    9.70
   9  17   0   23.90    7.50
   9  17   0   23.60    2.90
   9  17   0   26.70    8.90
 -11 -17   0   19.90    7.30
  11 -17   0   38.40    3.40
  11 -17   0   27.50    6.80
  11 -17   0   44.40   11.90
 -11 -17   0   47.70   11.00
 -11 -17   0   41.30    3.30
  11  17   0   38.60    3.60
  11  17   0   38.50    8.50
 -11  17   0   35.30   11.30
  11  17   0   33.80   10.10
 -11  17   0   42.00    8.40
 -11  17   0   40.60    4.00
  13 -17   0   16.00    6.00
 -13 -17   0   20.10    8.70
 -13 -17   0   22.90    2.60
  13 -17   0   30.50    2.90
  13 -17   0   28.10   16.60
 -13  17   0   26.00    3.50
 -13  17   0   15.70    9.70
  13  17   0   18.80    8.30
 -13  17   0   28.50    7.20
  13  17   0   21.90    3.00
 -15 -17   0    2.70    1.80
  15 -17   0    3.00    2.00
 -15 -17   0    2.80    7.10
  15  17   0    2.60    2.20
  15  17   0   -1.80    6.60
 -15  17   0    1.80    2.60
 -17 -17   0   12.50    2.00
  17 -17   0    7.90    2.30
 -17 -17   0    7.10    7.90
  17  17   0    7.70    2.40
  17  17   0    5.10    7.60
 -17  17   0    9.80    2.90
 -19 -17   0   59.59   12.90
 -19 -17   0   62.49    4.90
  19 -17   0   66.59    5.00
 -19 -17   0   53.39   10.50
  19  17   0   66.79    5.10
 -19  17   0   61.89    5.40
 -21 -17   0   13.20    8.70
  21 -17   0   11.00    2.40
 -21 -17   0    5.80    5.70
 -21 -17   0   15.50    2.40
  21  17   0   15.40    2.60
 -21  17   0   10.20    3.00
 -23 -17   0    1.10    6.40
 -23 -17   0    3.60    1.90
  23 -17   0    2.50    2.30
 -23  17   0    0.80    2.80
  23  17   0    4.50    2.30
  25 -17   0    3.50    2.50
 -25 -17   0   10.70    2.10
 -25  17   0    5.80    3.00
  25  17   0    8.20    2.50
 -27 -17   0    4.80    2.00
  27 -17   0    4.60    2.40
 -27  17   0    1.70    3.10
  27  17   0    4.80    2.50
 -29 -17   0    3.30    2.10
  29 -17   0    0.00    2.40
  29  17   0    2.50    2.40
 -29  17   0   -0.40    3.00
  31 -17   0   15.40    2.90
 -31 -17   0   14.20    2.70
 -31  17   0   17.70    3.40
  31  17   0   13.30    2.80
  33 -17   0    4.30    2.70
 -33 -17   0    7.50    2.40
 -33  17   0    5.90    3.20
  33  17   0    5.10    2.60
  35 -17   0   11.90    2.80
 -35 -17   0   12.40    2.60
 -35  17   0    9.60    3.50
  35  17   0    5.70    2.70
 -37 -17   0    6.60    2.50
  37 -17   0    7.90    2.80
  37  17   0    5.10    2.80
 -37  17   0    7.80    3.40
   0 -18   0   74.19    5.60
   0 -18   0   68.19   10.80
   0 -18   0   81.69   14.30
   0 -18   0   82.89    5.70
   0  18   0   75.49   13.70
   0  18   0   77.59   11.00
   0  18   0   74.69    5.90
   2 -18   0   19.80    9.90
   2 -18   0   24.60    7.40
  -2 -18   0   18.90    9.80
  -2 -18   0   17.50    2.40
  -2 -18   0   15.60    2.50
  -2 -18   0   12.10    6.70
   2  18   0   12.30    6.60
   2  18   0   14.50    8.30
  -2  18   0   30.50   10.00
   2  18   0   18.20    2.80
  -2  18   0   30.60    7.80
  -2  18   0   25.60    3.10
  -4 -18   0   73.69   14.30
   4 -18   0   69.19   10.30
  -4 -18   0   72.69    5.10
   4 -18   0   67.09    5.10
   4 -18   0   72.79    5.20
  -4 -18   0   63.59    5.00
  -4 -18   0   55.29   10.00
   4 -18   0   70.79   14.40
   4  18   0   69.79    5.40
   4  18   0   50.29   11.60
   4  18   0   67.19   10.40
  -4  18   0   65.49    5.40
  -4  18   0   54.59   12.20
  -4  18   0   69.49   10.30
   6 -18   0   22.30   10.10
   6 -18   0   15.80    2.30
  -6 -18   0   -1.30    8.10
  -6 -18   0   11.20    2.00
  -6 -18   0    7.00    5.90
  -6 -18   0    8.90    2.00
   6 -18   0   13.70    2.20
   6 -18   0   13.50    6.30
  -6  18   0    3.70    8.10
   6  18   0   13.20    2.70
  -6  18   0   19.40    2.90
   6  18   0    4.80    7.80
   6  18   0   11.50    6.60
  -6  18   0   18.00    6.40
   8 -18   0   30.60    3.00
   8 -18   0   33.90   11.10
  -8 -18   0   32.30    3.00
  -8 -18   0   28.50    7.80
   8 -18   0   34.60    3.10
  -8 -18   0   27.00    9.90
   8 -18   0   29.30    7.60
   8  18   0   21.60    9.30
  -8  18   0   26.10    9.90
  -8  18   0   26.70    7.70
  -8  18   0   35.20    3.70
   8  18   0   27.20    8.30
   8  18   0   30.80    3.30
  10 -18   0   32.80   11.90
  10 -18   0   49.30    3.90
 -10 -18   0   40.50   11.50
 -10 -18   0   43.90    3.80
 -10 -18   0   28.80    8.40
  10 -18   0   43.00    8.20
 -10  18   0   56.99    9.40
  10  18   0   46.20    4.00
 -10  18   0   51.49    4.40
  10  18   0   39.20   11.50
  10  18   0   41.50   11.30
 -10  18   0   49.60   12.20
 -12 -18   0   16.40    2.40
  12 -18   0   19.10    2.60
 -12 -18   0   21.30    9.60
  12 -18   0   20.80    6.30
 -12  18   0   21.60    3.10
  12  18   0   14.30    8.40
  12  18   0   17.10    2.80
  14 -18   0    5.10    2.10
 -14 -18   0    7.60    1.90
 -14 -18   0    6.70    7.70
  14  18   0    3.50    7.10
  14  18   0    4.10    2.30
 -14  18   0    4.60    2.70
 -16 -18   0   15.80    9.00
  16 -18   0   10.10    2.30
 -16  18   0   13.70    3.00
  16  18   0   10.00    8.10
 -18 -18   0   14.70    2.60
  18 -18   0   14.40    2.60
 -18 -18   0    5.30    8.80
 -18  18   0   18.60    3.20
  18  18   0    9.60    8.30
  18  18   0   15.60    2.70
 -20 -18   0   14.00    6.40
 -20 -18   0   14.10    2.50
 -20 -18   0   16.80    9.70
  20 -18   0   15.80    2.80
  20  18   0   12.90    2.60
 -20  18   0   18.20    3.30
  22 -18   0   17.90    2.90
 -22 -18   0   15.60    2.70
  22  18   0   16.50    2.80
 -22  18   0   20.40    3.20
 -24 -18   0    1.20    1.90
  24 -18   0    0.90    2.40
 -24  18   0   -1.20    2.90
  24  18   0    1.10    2.30
 -26 -18   0    4.50    1.90
  26 -18   0    2.20    2.40
  26  18   0    5.30    2.50
 -26  18   0    4.00    3.00
 -28 -18   0    9.40    2.40
  28 -18   0    6.00    2.70
 -28  18   0    7.80    3.20
  28  18   0   11.40    2.60
 -30 -18   0    8.30    2.30
  30 -18   0   11.40    2.80
 -30  18   0    9.00    3.30
  30  18   0    6.90    2.60
  32 -18   0    5.70    2.70
 -32 -18   0    8.20    2.40
  32  18   0    2.20    2.60
 -32  18   0    5.40    3.40
  34 -18   0   12.70    3.00
 -34 -18   0   11.40    2.60
 -34  18   0    6.20    3.50
  34  18   0   10.30    2.70
  36 -18   0   11.00    2.90
 -36 -18   0    9.00    2.60
 -36  18   0    7.40    3.60
  36  18   0    4.90    2.60
  -1 -19   0   18.20    2.70
   1 -19   0   12.70    6.50
  -1 -19   0   21.90    2.60
   1 -19   0   17.40   10.00
   1 -19   0   17.30    2.60
  -1 -19   0   22.70   10.40
   1 -19   0   15.60    2.50
  -1 -19   0   14.40    6.40
   1  19   0   11.80    8.70
  -1  19   0   18.60    7.20
  -1  19   0   10.80    8.90
  -1  19   0   20.00    3.10
   1  19   0   22.00    3.00
   1  19   0   16.70    7.30
  -3 -19   0   26.30   11.10
   3 -19   0   26.60    2.80
  -3 -19   0   12.80    6.80
   3 -19   0   29.10   11.50
   3 -19   0   24.00    2.60
   3 -19   0   16.90    7.10
  -3 -19   0   22.80    2.90
  -3 -19   0   20.30    2.70
  -3  19   0   16.70    8.60
   3  19   0   28.10   10.10
  -3  19   0   22.40    3.30
  -3  19   0   23.70    7.50
   3  19   0   24.10    3.20
   3  19   0   18.30    7.50
   5 -19   0   32.20    3.10
   5 -19   0   24.50   10.70
   5 -19   0   22.50    2.90
  -5 -19   0   34.60    3.10
   5 -19   0   17.40    7.20
  -5 -19   0   20.10    7.70
  -5 -19   0   32.30    2.90
  -5 -19   0   21.10   10.80
   5  19   0   29.00    3.40
   5  19   0   28.80    8.10
  -5  19   0   23.30    3.50
   5  19   0   32.90   10.70
  -5  19   0   15.80    9.20
  -5  19   0   26.40    7.80
   7 -19   0   18.40    2.70
   7 -19   0   16.40    2.60
  -7 -19   0   16.10    7.20
  -7 -19   0   34.50   10.80
   7 -19   0   10.90    6.70
   7 -19   0   20.80   10.20
   7  19   0   30.20    3.10
   7  19   0   12.80    8.30
  -7  19   0   16.40    9.30
  -7  19   0   22.00    7.50
  -7  19   0   21.70    3.10
   7  19   0   22.60    7.70
  -9 -19   0   10.20    9.10
  -9 -19   0    9.20    2.10
   9 -19   0    9.20    2.20
   9 -19   0    3.90    5.90
  -9  19   0    8.60    2.90
  -9  19   0   15.30    6.80
   9  19   0    7.80    7.90
   9  19   0   11.00    2.50
 -11 -19   0   15.60    9.20
  11 -19   0   15.50    2.60
 -11 -19   0   16.10    2.40
  11  19   0   15.50    2.70
 -11  19   0   17.70    3.20
  11  19   0   13.50    8.90
  13 -19   0   57.09    4.60
 -13 -19   0   57.49    4.40
 -13 -19   0   42.20   11.80
  13  19   0   48.00   11.90
  13  19   0   58.59    4.70
 -13  19   0   50.69    4.90
  15 -19   0    8.00    2.40
 -15 -19   0   13.10    9.60
 -15 -19   0   10.20    2.00
  15  19   0    8.00    2.50
 -15  19   0    7.80    3.10
  15  19   0    6.50    8.10
 -17 -19   0    7.70    2.10
  17 -19   0    4.80    2.40
 -17 -19   0    8.40    7.90
  17  19   0   -2.50    8.30
  17  19   0    3.10    2.40
 -17  19   0    3.00    3.10
 -19 -19   0   21.80    3.00
  19 -19   0   31.00    3.20
 -19  19   0   30.10    3.80
  19  19   0   22.40    3.30
  21 -19   0    4.00    2.50
 -21 -19   0    0.70    2.00
 -21  19   0    5.50    2.90
  21  19   0    4.20    2.40
  23 -19   0   -1.10    2.50
 -23 -19   0   -1.20    1.90
  23  19   0    0.30    2.40
 -23  19   0   -0.80    2.90
 -25 -19   0    6.10    2.10
  25 -19   0    6.80    2.50
 -25  19   0    4.10    3.00
  25  19   0    6.80    2.50
  27 -19   0    2.30    2.50
 -27 -19   0    6.00    2.20
 -27  19   0    1.10    3.00
  27  19   0    5.30    2.50
  29 -19   0   12.20    2.90
 -29 -19   0   11.40    2.40
 -29  19   0   11.90    3.30
  29  19   0   11.20    2.90
  31 -19   0    5.90    2.70
 -31 -19   0    6.70    2.50
  31  19   0    6.20    2.70
 -31  19   0    4.80    3.30
 -33 -19   0    4.80    2.40
  33 -19   0    3.70    2.60
 -33  19   0    2.80    3.30
  33  19   0    3.10    2.60
  35 -19   0    2.80    2.70
 -35 -19   0    3.80    2.50
  35  19   0    1.80    2.70
 -35  19   0   -1.60    3.30
   0 -20   0   45.00    4.00
   0 -20   0   47.00    4.10
   0 -20   0   44.20   13.30
   0 -20   0   31.40    8.90
   0  20   0   39.30   10.90
   0  20   0   50.99    4.40
   0  20   0   53.29   10.20
  -2 -20   0   27.80    8.20
  -2 -20   0   49.10    4.20
   2 -20   0   52.59    4.20
  -2 -20   0   46.30    4.00
   2 -20   0   43.40   13.20
   2 -20   0   48.30    4.00
   2 -20   0   30.20    8.40
  -2 -20   0   54.19   13.10
  -2  20   0   53.49    4.50
   2  20   0   49.20   10.30
  -2  20   0   54.79   10.30
   2  20   0   50.39    4.50
   2  20   0   33.10   11.60
  -2  20   0   44.10   12.00
   4 -20   0   35.90   15.80
   4 -20   0   38.10    3.40
   4 -20   0   29.40    8.30
  -4 -20   0   34.00    3.30
  -4 -20   0    8.40   10.30
   4 -20   0   34.80    3.30
  -4 -20   0   20.90    7.90
  -4  20   0   35.10   10.90
  -4  20   0   42.00    3.90
   4  20   0   33.60    3.70
   4  20   0   25.90   10.30
  -4  20   0   32.00    8.70
   4  20   0   38.30    9.30
   6 -20   0    8.20    2.20
  -6 -20   0    8.20    1.90
   6 -20   0    5.70    2.00
   6 -20   0    4.20    6.20
  -6 -20   0    5.30    9.10
   6  20   0   10.30    2.70
   6  20   0    7.40    8.60
  -6  20   0    9.90    2.80
  -6  20   0    5.30    6.30
   8 -20   0    1.70    2.10
  -8 -20   0    7.20    8.70
  -8 -20   0    5.50    1.90
   8 -20   0   -4.10    5.70
   8  20   0    3.10    2.60
   8  20   0    9.40    8.70
  -8  20   0    3.00    2.70
  10 -20   0   46.40    4.30
 -10 -20   0   51.79   13.00
 -10 -20   0   50.49    4.20
  10  20   0   44.10   12.10
  10  20   0   56.19    4.50
 -10  20   0   55.29    4.80
  12 -20   0   23.30    3.00
 -12 -20   0   21.90    2.80
 -12 -20   0   17.90   10.20
  12  20   0   22.50   10.50
  12  20   0   20.20    3.20
 -12  20   0   25.50    3.50
 -14 -20   0   -1.40    8.00
  14 -20   0    7.50    2.40
 -14 -20   0    8.00    2.00
 -14  20   0   11.40    3.00
  14  20   0    7.50    2.60
  14  20   0    9.50    9.00
 -16 -20   0    6.30    2.20
  16 -20   0    6.10    2.50
  16  20   0    8.50    2.60
 -16  20   0    7.70    3.00
 -18 -20   0    0.60    2.00
  18 -20   0    7.80    2.50
  18  20   0    0.60    2.50
 -18  20   0    1.80    2.90
  20 -20   0   -1.10    2.40
 -20 -20   0   -0.40    2.00
 -20  20   0    1.50    3.10
  20  20   0    0.40    2.40
 -22 -20   0    0.60    2.00
  22 -20   0    6.40    2.60
  22  20   0    1.70    2.50
 -22  20   0    2.70    2.90
  24 -20   0    2.60    2.60
 -24 -20   0    2.60    2.10
  24  20   0    3.10    2.60
 -24  20   0    1.40    3.00
 -26 -20   0    8.70    2.30
  26 -20   0    6.90    2.80
  26  20   0   11.10    2.90
 -26  20   0    6.30    3.20
  28 -20   0   20.10    3.30
 -28 -20   0   24.30    3.00
  28  20   0   23.50    3.50
 -28  20   0   17.30    3.70
 -30 -20   0    1.40    2.40
  30 -20   0    2.40    2.70
 -30  20   0    1.30    3.10
  30  20   0    5.20    2.70
 -32 -20   0    4.70    2.40
  32 -20   0    7.50    2.90
 -32  20   0    3.10    3.30
  32  20   0    4.50    2.70
   1 -21   0   37.40    8.80
  -1 -21   0   20.40    8.10
  -1 -21   0   34.60   14.10
  -1 -21   0   34.80    3.90
  -1 -21   0   32.80    3.30
   1  21   0   34.60    3.80
   1  21   0   32.40    9.20
   1  21   0   26.40   10.40
  -1  21   0   59.79   10.60
   3 -21   0   31.50    3.00
   3 -21   0   32.10    3.30
  -3 -21   0   21.40    2.90
   3 -21   0   18.50    7.60
  -3 -21   0   11.20   10.40
  -3 -21   0    8.40    7.40
  -3  21   0   22.60    8.10
   3  21   0    8.10    9.10
   3  21   0   24.40    3.50
  -3  21   0   32.90    3.60
  -5 -21   0   15.00   10.70
  -5 -21   0   37.50    3.30
   5 -21   0   20.40    7.50
   5 -21   0   34.70    3.50
   5 -21   0   24.60    3.20
  -5  21   0   34.20    3.90
   5  21   0   38.70    3.80
   5  21   0   33.90   11.50
   7 -21   0    9.60    2.50
  -7 -21   0   11.00   10.30
   7  21   0   12.80    9.40
   7  21   0   19.40    3.00
  -7  21   0    9.90    2.90
  -9 -21   0   14.70    2.50
  -9 -21   0    1.30    9.00
   9 -21   0   14.80    2.80
   9  21   0   19.50    3.00
   9  21   0   14.10    9.10
  -9  21   0   12.40    3.10
  11 -21   0    6.70    2.40
 -11 -21   0   13.40    9.80
 -11 -21   0    4.50    2.10
  11  21   0    4.50    9.00
  11  21   0    4.60    2.50
 -11  21   0    4.60    3.00
  13 -21   0   34.80    3.60
 -13 -21   0   28.20    3.30
  13  21   0   37.60    3.80
 -13  21   0   35.80    3.90
 -15 -21   0   -0.90    2.10
  15 -21   0    2.30    2.30
 -15  21   0    4.50    3.00
  15  21   0   -1.20    2.60
 -17 -21   0   -0.20    2.10
  17 -21   0    0.30    2.40
 -17  21   0    1.80    2.80
  17  21   0   -0.20    2.40
 -19 -21   0    5.00    2.10
  19 -21   0   10.70    2.60
 -19  21   0    7.40    3.30
  19  21   0    5.10    2.60
  21 -21   0    1.40    2.50
 -21 -21   0    0.90    2.10
 -21  21   0   -1.30    2.90
  21  21   0    1.40    2.50
 -23 -21   0   13.80    2.60
  23 -21   0   12.70    2.90
 -23  21   0    8.90    3.50
  23  21   0   13.50    2.80
  25 -21   0   12.70    3.00
 -25 -21   0   18.10    2.70
 -25  21   0   12.00    3.50
  25  21   0   14.50    2.90
 -27 -21   0    4.90    2.40
  27 -21   0    2.50    2.80
 -27  21   0    8.50    3.40
  27  21   0    2.30    2.60
  29 -21   0    6.60    2.90
 -29 -21   0    2.30    2.30
  29  21   0    1.20    2.70
 -29  21   0    3.90    3.30
  31 -21   0   10.00    3.00
 -31 -21   0    6.10    2.60
 -31  21   0    3.60    3.40
  31  21   0    6.20    2.80
   0 -22   0   33.30    3.40
   0 -22   0   17.90    7.70
   0  22   0   27.30    9.10
   0  22   0   40.80    3.70
   2 -22   0   48.30    4.10
  -2 -22   0   37.60    4.00
   2 -22   0   35.70   10.00
   2 -22   0   55.19    4.30
  -2  22   0   57.39    4.60
   2  22   0   44.20    4.50
  -2  22   0   40.90   11.00
   4 -22   0   94.89    7.10
   4 -22   0  100.79    7.30
  -4 -22   0   96.19    7.10
  -4  22   0  106.39    7.50
   4  22   0   94.89    7.30
   6 -22   0    9.60    2.40
  -6 -22   0    6.90    2.20
   6  22   0    1.80    8.70
  -6  22   0   10.30    3.00
   6  22   0    9.30    2.80
   8 -22   0    8.50    2.60
  -8 -22   0    8.70    2.20
   8  22   0    6.20    2.70
   8  22   0    5.30    8.80
  -8  22   0    9.10    3.00
 -10 -22   0   15.20    2.70
  10 -22   0   18.80    2.90
  10  22   0   17.90    3.00
 -10  22   0   18.10    3.30
  12 -22   0    8.40    2.50
 -12 -22   0    5.00    2.10
  12  22   0    6.60    2.70
 -12  22   0    9.30    3.00
  14 -22   0    3.40    2.40
 -14 -22   0    4.00    2.20
 -14  22   0    1.60    2.90
  14  22   0    4.00    2.60
 -16 -22   0    4.50    2.20
  16 -22   0    1.70    2.50
 -16  22   0    4.60    3.00
  16  22   0    3.90    2.60
  18 -22   0    2.20    2.60
 -18 -22   0    0.70    2.10
  18  22   0    1.60    2.60
 -18  22   0    1.30    3.00
 -20 -22   0   17.90    2.80
  20 -22   0   16.10    3.00
  20  22   0   16.70    3.10
 -20  22   0   12.40    3.20
  22 -22   0   19.60    3.50
 -22 -22   0   23.40    3.00
  22  22   0   26.20    3.60
 -22  22   0   18.00    3.90
 -24 -22   0    1.20    2.10
  24 -22   0   -2.20    2.80
  24  22   0    1.20    2.60
 -24  22   0    0.10    3.10
 -26 -22   0    3.30    2.40
  26 -22   0    0.70    2.80
 -26  22   0    2.20    3.50
  26  22   0    3.40    2.70
  28 -22   0   11.50    3.00
 -28 -22   0    7.10    2.50
  28  22   0    6.50    3.10
 -28  22   0    8.40    3.50
   1 -23   0   20.70    3.00
  -1 -23   0   24.90    3.10
   1  23   0   24.20    3.50
  -1  23   0   20.70    3.20
   3 -23   0   14.10    2.80
  -3 -23   0   22.40    2.90
  -3  23   0   25.00    3.50
   3  23   0   25.50    3.40
   5 -23   0   23.20    3.40
  -5 -23   0   21.60    3.00
   5  23   0   28.40    3.60
  -5  23   0   19.80    3.50
   7 -23   0   23.10    3.20
  -7 -23   0   21.20    3.10
  -7  23   0   22.60    3.60
   7  23   0   25.60    3.50
  -9 -23   0    0.40    2.10
   9 -23   0    6.00    2.60
  -9  23   0    3.20    2.90
   9  23   0    2.50    2.60
 -11 -23   0    6.30    2.30
  11 -23   0   11.70    2.70
  11  23   0    5.50    2.80
 -11  23   0   12.40    3.10
 -13 -23   0   11.10    2.60
  13 -23   0   10.70    2.70
  13  23   0    7.00    2.90
 -13  23   0   10.00    3.10
 -15 -23   0    0.30    2.20
  15 -23   0    2.00    2.60
  15  23   0    0.90    2.70
 -15  23   0    1.10    3.00
  17 -23   0    9.20    2.90
 -17 -23   0   10.50    2.40
 -17  23   0    6.30    3.10
  17  23   0    9.10    2.80
 -19 -23   0   29.00    3.30
  19 -23   0   31.60    3.80
 -19  23   0   23.90    4.10
  19  23   0   30.50    3.80
  21 -23   0    2.30    2.80
 -21 -23   0    2.10    2.10
  21  23   0    2.70    2.80
 -21  23   0    4.40    3.10
  23 -23   0    1.50    2.80
 -23 -23   0    2.60    2.10
  23  23   0    1.20    2.90
 -23  23   0    1.70    3.10
 -25 -23   0    4.70    2.60
  25 -23   0    6.40    2.90
  25  23   0    2.60    2.80
 -25  23   0    7.00    3.50
  27 -23   0    6.10    3.00
 -27 -23   0    6.70    2.40
  27  23   0    5.30    3.00
 -27  23   0    6.80    3.40
   0 -24   0    9.20    2.30
   0  24   0   12.50    3.10
   2 -24   0    2.30    2.30
  -2 -24   0    4.30    2.30
   2  24   0    5.90    2.90
  -2  24   0    6.10    2.70
  -4 -24   0   21.20    3.10
  -4  24   0   23.70    3.60
   4  24   0   25.10    3.60
  -6 -24   0   10.20    2.40
   6 -24   0    7.00    2.90
  -6  24   0   10.10    3.20
   6  24   0   13.40    3.00
   8 -24   0    1.60    2.50
  -8 -24   0    4.10    2.20
  -8  24   0    4.90    3.00
   8  24   0    5.60    2.90
 -10 -24   0   14.60    2.60
  10 -24   0   18.20    3.10
 -10  24   0   14.90    3.20
  10  24   0   10.60    3.00
 -12 -24   0    4.60    2.30
  12 -24   0    3.30    2.70
 -12  24   0    2.30    3.10
  12  24   0    1.50    2.70
  14 -24   0    7.40    2.80
 -14 -24   0   10.80    2.50
 -14  24   0    6.80    3.20
  14  24   0    7.70    2.90
 -16 -24   0    9.50    2.50
  16 -24   0    8.00    3.00
 -16  24   0    4.60    3.30
  16  24   0   11.80    3.00
  18 -24   0    3.70    2.70
 -18 -24   0    3.10    2.30
 -18  24   0    3.50    3.20
  18  24   0    3.00    2.80
  20 -24   0    8.20    3.00
 -20 -24   0    5.20    2.30
  20  24   0    5.50    2.90
 -20  24   0    6.50    3.10
  22 -24   0   10.90    3.10
 -22 -24   0    7.80    2.40
  22  24   0   10.00    3.10
 -22  24   0    9.60    3.50
  24 -24   0    2.10    3.00
 -24 -24   0    3.20    2.40
 -24  24   0    2.10    3.20
  24  24   0    3.80    2.80
  -1 -25   0   10.70    2.60
   1 -25   0    6.20    2.80
   1  25   0   14.00    3.10
  -1  25   0   13.30    3.20
  -3 -25   0   10.80    2.50
  -3  25   0    8.20    2.90
   3  25   0   12.40    3.10
  -5 -25   0    7.10    2.40
  -5  25   0    8.10    3.10
   5  25   0    7.20    3.00
  -7 -25   0   13.40    2.70
  -7  25   0   13.30    3.30
   7  25   0   10.60    3.00
   9 -25   0   13.90    3.00
  -9 -25   0   16.90    2.90
  -9  25   0   13.70    3.40
   9  25   0   15.20    3.20
 -11 -25   0   25.80    3.30
  11 -25   0   23.90    3.70
 -11  25   0   17.00    3.60
  11  25   0   25.20    3.70
 -13 -25   0   20.50    3.10
  13 -25   0   24.00    3.50
 -13  25   0   21.10    3.60
  13  25   0   18.10    3.30
  15 -25   0    2.60    2.70
 -15 -25   0    1.70    2.40
 -15  25   0    0.20    3.20
  15  25   0    4.30    2.90
  17 -25   0    5.20    2.90
 -17 -25   0    3.00    2.30
  17  25   0    2.50    2.80
 -17  25   0    4.10    3.20
  19 -25   0   15.90    3.30
 -19 -25   0   17.90    3.00
 -19  25   0   16.00    3.60
  19  25   0   11.60    3.20
  21 -25   0    8.10    3.10
 -21 -25   0    5.30    2.30
  21  25   0    6.20    3.00
 -21  25   0   10.10    3.40
   0  26   0   31.50    4.00
  -2 -26   0   15.80    2.90
  -2  26   0   24.30    3.70
   2  26   0   24.80    3.60
  -4 -26   0    4.30    2.50
  -4  26   0    3.90    2.90
   4  26   0    8.80    3.00
  -6 -26   0    9.90    2.80
  -6  26   0   10.60    3.40
   6  26   0   12.00    3.20
  -8 -26   0    9.80    2.60
  -8  26   0   15.50    3.50
   8  26   0   11.20    3.10
 -10 -26   0   11.10    2.60
 -10  26   0   13.10    3.40
  10  26   0   12.30    3.10
  12 -26   0    2.10    2.80
 -12 -26   0    3.60    2.50
 -12  26   0    1.70    3.20
  12  26   0    5.40    3.00
  14 -26   0    7.70    3.10
 -14 -26   0    6.30    2.50
 -14  26   0    4.20    3.20
  14  26   0    7.90    3.20
 -16 -26   0    2.30    2.40
  16 -26   0    3.20    3.00
 -16  26   0    7.10    3.40
  16  26   0    4.80    3.00
  -1  27   0    9.80    3.10
   1  27   0    7.80    3.20
  -3 -27   0    3.10    2.70
  -3  27   0   10.40    3.30
   3  27   0    6.40    3.10
  -5 -27   0    3.10    2.60
   5  27   0   10.30    3.20
  -5  27   0    7.00    2.90
  -7 -27   0    2.40    2.60
  -7  27   0    3.00    3.30
   7  27   0    6.10    3.00
  -9 -27   0    2.80    2.60
  -9  27   0    6.60    3.30
   9  27   0    7.60    3.00
 -11 -27   0    4.20    2.60
  11  27   0    9.50    3.00
 -11  27   0    5.80    3.40
  48   0  -1    2.50    2.50
  48   0  -1    2.10    2.40
  46   0  -1    1.50    2.40
  46   0  -1    1.70    2.50
  44   0  -1   -0.50    2.20
  44   0  -1    3.30    2.40
  42   0  -1   -1.00    2.10
  42   0  -1    1.50    2.20
 -40   0   1    0.10    2.40
  40   0  -1   -0.50    2.00
  40   0  -1   -1.40    2.10
  38   0  -1    5.40    2.30
  38   0  -1    8.70    7.80
 -38   0   1    8.90    2.40
  38   0  -1    7.60    2.10
  36   0  -1   23.80    2.80
 -36   0   1   27.20    2.90
 -36   0   1   19.60    9.00
  36   0  -1   23.60    2.90
  36   0  -1   28.20    8.80
  34   0  -1    5.30    2.10
 -34   0   1    4.00    2.20
  34   0  -1    2.90    6.50
  34   0  -1    5.90    1.80
 -34   0   1    6.10    7.30
  32   0  -1   53.89    4.30
 -32   0   1   44.00    9.50
  32   0  -1   57.49   10.20
 -32   0   1   52.49    4.20
  32   0  -1   47.70   10.00
 -32   0   1   50.89   11.50
  32   0  -1   54.29    4.10
 -30   0   1   27.90    9.40
  30   0  -1   23.40    2.70
 -30   0   1   22.50    2.60
 -30   0   1   24.00    7.70
  30   0  -1   26.50    7.70
  30   0  -1   27.50    8.10
  30   0  -1   27.20    2.60
  28   0  -1   18.50    6.50
 -28   0   1    8.30    6.40
 -28   0   1   13.40    6.50
 -28   0   1   22.40    2.20
  28   0  -1   17.10    2.40
  28   0  -1   15.60    2.30
  28   0  -1   18.30    6.00
 -26   0   1   44.70    3.60
 -26   0   1   46.90    8.70
 -26   0   1   41.70    9.70
  26   0  -1   49.20    8.80
  26   0  -1   45.70    3.70
  26   0  -1   46.80    7.90
  26   0  -1   47.40    3.60
  24   0  -1  128.69    9.00
 -24   0   1  131.69   12.90
  24   0  -1  139.79   12.70
 -24   0   1  127.89    9.00
  24   0  -1  153.18   14.20
  24   0  -1  135.69    9.10
 -24   0   1  133.79   14.80
  22   0  -1   19.60    2.20
 -22   0   1   22.70    6.90
  22   0  -1   18.30    5.40
  22   0  -1   24.60    6.40
 -22   0   1   17.10    5.60
  22   0  -1   22.10    2.30
  20   0  -1  918.21   64.79
  20   0  -1 1008.60   64.79
 -20   0   1 1038.90   69.19
 -20   0   1  915.71   66.89
  20   0  -1  986.00   68.59
  20   0  -1 1028.80   67.19
 -18   0   1   21.10    6.00
  18   0  -1   20.30    5.40
 -18   0   1   25.60    5.10
  18   0  -1   23.90    5.00
  16   0  -1   66.99    7.00
 -16   0   1   67.29    8.50
 -16   0   1   50.49    6.70
  16   0  -1   63.09    8.00
  14   0  -1   26.00    5.40
  14   0  -1   24.50    4.50
 -14   0   1   29.50    5.80
 -14   0   1   26.80    4.70
  12   0  -1   24.60    5.20
  12   0  -1   31.60    4.50
 -12   0   1   22.50    5.10
 -10   0   1  728.53   50.09
  10   0  -1  734.73   49.10
  10   0  -1  708.83   49.90
 -10   0   1  728.43   48.90
  -8   0   1  324.97   22.10
   8   0  -1  286.87   22.90
  -8   0   1  306.87   23.00
   8   0  -1  357.66   22.40
   6   0  -1   95.99    7.30
  -4   0   1  171.08   11.90
  -4   0   1  174.38   12.40
  -2   0   1    9.20    1.50
  -2   0  -1  519.05   35.00
  -4   0  -1  566.34   37.80
  -4   0  -1  548.75   38.10
   6   0   1 3026.20  190.18
  -6   0  -1 2927.51  190.18
   6   0   1 2772.32  189.98
  -6   0  -1 2732.73  189.98
  -8   0  -1 1373.06   92.69
   8   0   1 1302.87   92.39
   8   0   1 1445.06   92.69
  -8   0  -1 1410.46   92.89
  10   0   1  596.14   42.00
 -10   0  -1  605.84   42.30
 -10   0  -1  631.54   42.70
  10   0   1  627.44   42.60
 -12   0  -1  145.99   12.80
  12   0   1  149.99   12.00
  12   0   1  151.78   12.50
 -12   0  -1  147.89   12.50
 -14   0  -1  285.37   22.20
  14   0   1  296.77   21.90
 -14   0  -1  311.97   23.10
  14   0   1  301.07   22.50
  16   0   1   53.79    6.80
 -16   0  -1   63.89    8.50
 -16   0  -1   53.79    7.80
  16   0   1   62.59    7.90
 -18   0  -1   43.50    8.10
  18   0   1   34.00    6.10
 -18   0  -1   33.20    6.90
  18   0   1   37.80    6.90
  18   0   1   34.80    3.00
  20   0   1  445.16   29.50
  20   0   1  433.26   31.90
 -20   0  -1  449.36   32.90
 -20   0  -1  446.36   33.90
  20   0   1  449.46   33.10
  22   0   1    8.10    4.90
 -22   0  -1    6.80    5.60
  22   0   1    5.90    1.70
 -22   0  -1    6.60    5.30
  22   0   1   12.70    4.90
  24   0   1   80.99    5.60
 -24   0  -1   72.69    5.40
 -24   0  -1   91.89   11.40
  24   0   1   78.19    9.40
  24   0   1   81.29   10.40
 -24   0  -1   79.89   11.60
  24   0   1   72.39    5.40
 -26   0  -1   15.40    7.10
  26   0   1   18.60    2.10
  26   0   1   24.30    7.30
  26   0   1   20.70    6.10
 -26   0  -1   20.20    2.30
  26   0   1   21.20    2.50
 -26   0  -1   17.00    8.00
  28   0   1   43.20    8.80
  28   0   1   38.50    3.40
 -28   0  -1   29.00    8.80
  28   0   1   37.10    3.00
  28   0   1   38.50    8.00
 -28   0  -1   36.70    3.20
 -28   0  -1   32.90    8.70
  30   0   1   41.50    9.10
  30   0   1   40.60    3.60
 -30   0  -1   36.40   10.20
  30   0   1   33.30    3.30
 -30   0  -1   30.00    8.60
  30   0   1   48.20    9.20
 -30   0  -1   45.30    3.40
  32   0   1   25.00    2.90
 -32   0  -1   28.40    2.90
  32   0   1   27.60    7.40
  32   0   1   25.90    7.90
  32   0   1   27.10    2.70
 -32   0  -1   20.90    8.40
 -32   0  -1   28.40    9.90
 -34   0  -1    2.20    2.20
  34   0   1   -0.30    5.50
  34   0   1    0.40    2.10
 -34   0  -1    6.10    7.80
 -34   0  -1   -3.80    6.80
  34   0   1    1.50    1.70
 -36   0  -1    3.50    7.80
  36   0   1    1.80    2.20
  36   0   1    0.80    6.50
  36   0   1    3.80    1.90
 -36   0  -1    3.50    2.20
 -38   0  -1    8.40    9.30
  38   0   1    5.10    2.30
  38   0   1   11.20    7.30
  38   0   1    2.80    2.00
 -38   0  -1    5.80    2.60
  40   0   1   -1.00    2.20
  40   0   1    0.80    2.00
 -40   0  -1    2.30    2.50
 -42   0  -1    4.80    2.70
  42   0   1    0.10    2.00
  42   0   1   -0.20    2.20
 -44   0  -1   40.00    4.70
  44   0   1   37.10    3.90
  46   0   1    0.40    2.50
  48   0   1    1.60    2.50
  47  -1  -1    3.90    2.50
  47  -1  -1    4.50    2.30
  47   1  -1    5.80    2.40
  47   1  -1    5.40    2.60
  45  -1  -1    6.20    2.40
  45  -1  -1    3.30    2.30
  45   1  -1   -0.60    2.30
  45   1  -1    3.80    2.50
  43  -1  -1    6.30    2.40
  43  -1  -1    6.00    2.30
 -43  -1   1    6.20    3.60
  43   1  -1    5.60    2.40
  43   1  -1    4.80    2.30
  41  -1  -1    5.30    2.30
  41  -1  -1    7.10    2.30
 -41  -1   1    8.10    2.70
  41   1  -1    5.10    2.40
  41   1  -1    5.60    2.30
  39  -1  -1    2.50    2.10
 -39  -1   1    3.80    2.40
  39  -1  -1   -0.30    2.00
  39   1  -1   -0.70    8.00
  39   1  -1    0.10    2.20
  39   1  -1    2.30    2.10
 -37  -1   1    6.70    2.40
  37  -1  -1    4.00    1.90
  37  -1  -1    4.90    8.00
  37  -1  -1    2.70    2.10
 -37  -1   1    1.80    7.40
  37   1  -1    4.60    2.20
  37   1  -1    7.80    7.10
  37   1  -1    3.90    2.00
 -37   1   1    2.80    2.20
  35  -1  -1   33.80    9.40
  35  -1  -1   45.10    3.70
  35  -1  -1   41.90    3.80
 -35  -1   1   44.70    3.80
 -35  -1   1   36.00    9.30
  35   1  -1   45.30    3.90
 -35   1   1   35.00   10.40
 -35   1   1   41.40    3.80
  35   1  -1   47.10    3.70
  35   1  -1   41.70   10.10
 -33  -1   1   14.80    7.60
  33  -1  -1   24.50    2.80
  33  -1  -1   23.10    2.60
 -33  -1   1   23.80    2.80
 -33  -1   1   24.00   12.00
  33  -1  -1   31.40    8.40
  33   1  -1   21.80    2.80
  33   1  -1   22.80    8.20
 -33   1   1   28.40    2.80
 -33   1   1   21.60    8.00
  33   1  -1   22.60    2.70
  31  -1  -1   10.60    6.30
  31  -1  -1   13.30    2.20
  31  -1  -1   15.10    6.50
 -31  -1   1    7.80    7.00
 -31  -1   1    7.20    7.20
  31  -1  -1   14.20    2.00
 -31  -1   1   11.70    2.10
 -31   1   1   14.40    2.30
 -31   1   1   11.30    7.60
 -31   1   1    7.40    6.60
  31   1  -1   10.90    5.90
  31   1  -1   10.00    2.10
  31   1  -1    8.10    6.10
  31   1  -1    9.90    1.90
  29  -1  -1   71.69    9.10
 -29  -1   1   39.50    9.70
  29  -1  -1   62.39    4.30
 -29  -1   1   38.70    8.90
  29  -1  -1   61.69    4.10
  29  -1  -1   63.89   10.30
 -29  -1   1   43.80    4.20
 -29   1   1   63.09    4.10
  29   1  -1   47.40   10.00
 -29   1   1   50.49   11.10
  29   1  -1   43.60    4.30
  29   1  -1   52.19    9.70
 -29   1   1   62.19   10.20
 -27  -1   1   62.89    4.00
  27  -1  -1   51.79    9.30
  27  -1  -1   51.89    4.10
 -27  -1   1   59.09    9.30
 -27  -1   1   61.69   10.80
  27  -1  -1   53.69    8.40
  27  -1  -1   49.40    4.10
  27   1  -1   53.49    4.10
 -27   1   1   47.70   10.40
 -27   1   1   45.10    4.00
  27   1  -1   54.79    4.20
  27   1  -1   57.59    9.40
 -27   1   1   46.80    9.10
  27   1  -1   69.39    9.30
 -25  -1   1   46.10    9.50
  25  -1  -1   48.70    8.80
  25  -1  -1   43.20    3.40
 -25  -1   1   42.10    3.30
  25  -1  -1   43.30    3.50
  25  -1  -1   49.70    7.60
 -25  -1   1   48.30    8.60
  25   1  -1   44.70    3.50
  25   1  -1   51.29    8.50
 -25   1   1   44.40    3.60
 -25   1   1   45.20    9.90
  25   1  -1   52.49    7.80
  25   1  -1   41.00    3.50
 -25   1   1   34.40    7.50
  23  -1  -1   28.80    2.90
 -23  -1   1   31.20    7.80
  23  -1  -1   32.70    7.50
 -23  -1   1   38.30    7.30
  23  -1  -1   32.20    2.70
  23  -1  -1   33.60    6.40
 -23  -1   1   37.00    2.70
  23   1  -1   29.00    2.80
  23   1  -1   35.00    6.80
 -23   1   1   22.90    6.00
  23   1  -1   32.20    2.90
  23   1  -1   26.90    6.80
 -23   1   1   30.70    7.80
 -21  -1   1  247.98   20.30
  21  -1  -1  232.68   19.30
  21  -1  -1  234.78   15.20
 -21  -1   1  224.98   18.20
  21  -1  -1  200.98   15.10
  21  -1  -1  257.47   18.10
 -21   1   1  202.58   17.90
  21   1  -1  238.08   18.30
  21   1  -1  226.48   19.10
  21   1  -1  234.38   15.20
 -21   1   1  230.98   20.30
  21   1  -1  214.48   15.10
  19  -1  -1  219.28   14.20
 -19  -1   1  207.78   18.30
  19  -1  -1  195.58   14.20
 -19  -1   1  196.98   16.60
  19  -1  -1  215.98   18.20
  19  -1  -1  211.38   16.50
 -19   1   1  237.68   19.00
  19   1  -1  212.88   17.90
  19   1  -1  220.98   17.00
 -19   1   1  218.08   16.60
 -17  -1   1  234.58   20.60
  17  -1  -1  261.87   19.00
  17  -1  -1  253.97   20.60
 -17  -1   1  233.58   19.10
 -17   1   1  274.07   21.10
  17   1  -1  252.07   19.30
 -17   1   1  273.17   19.00
  17   1  -1  256.07   20.30
  15  -1  -1   33.00    4.90
 -15  -1   1   27.20    5.10
  15  -1  -1   29.60    6.00
 -15  -1   1   33.10    6.30
 -15   1   1   32.20    6.80
 -15   1   1   30.10    4.90
  15   1  -1   29.40    5.20
  15   1  -1   32.00    5.80
 -13  -1   1   96.09    9.20
 -13  -1   1   87.69    7.90
  13  -1  -1   81.89    9.00
  13  -1  -1   85.29    7.60
 -13   1   1   88.99    9.70
  13   1  -1   98.49    9.00
  13   1  -1   96.69    8.10
 -13   1   1   71.29    7.40
  11  -1  -1  772.02   52.49
 -11  -1   1  829.42   51.69
 -11  -1   1  825.72   52.69
  11  -1  -1  767.52   51.29
  11   1  -1  755.92   51.79
 -11   1   1  670.23   51.09
 -11   1   1  726.73   52.69
  11   1  -1  742.83   52.29
  -9  -1   1  987.00   69.99
   9  -1  -1 1029.00   70.79
   9  -1  -1  998.70   69.59
  -9  -1   1 1026.20   70.69
   9   1  -1 1099.69   70.69
  -9   1   1 1055.49   70.99
   9   1  -1 1067.19   70.19
  -9   1   1 1087.09   69.59
   7  -1  -1 1430.36   95.89
  -7  -1   1 1425.36   95.89
  -7  -1   1 1540.85   95.39
   7  -1  -1 1497.55   94.99
   7   1  -1 1388.46   95.79
  -7   1   1 1358.86   94.89
   7   1  -1 1407.76   95.39
  -7   1   1 1398.26   95.99
  -5  -1   1  152.98    9.80
   5  -1  -1  139.49   10.10
  -5  -1   1  125.79   10.00
   5   1  -1  113.59    9.90
  -5   1   1  132.39   10.20
  -5   1   1  128.39    9.20
   5   1  -1  132.39    9.70
  -3  -1   1 1309.77   83.09
  -3  -1   1 1158.68   83.29
  -3   1   1 1203.18   82.69
  -3   1   1 1329.17   83.29
  -1  -1   1  529.75   35.70
   1   1  -1  536.75   36.10
  -1  -1  -1   58.89    4.60
  -1   1  -1   54.39    4.70
  -3  -1  -1 1449.85   93.29
  -3   1  -1 1431.76   93.49
  -3   1  -1 1324.87   93.39
   5  -1   1  970.20   71.79
  -5  -1  -1 1076.59   71.99
   5  -1   1 1079.59   72.19
   5   1   1 1111.59   71.59
   5   1   1 1128.39   71.89
  -5   1  -1 1053.89   71.99
  -5   1  -1 1101.19   72.29
  -7  -1  -1   18.60    3.10
   7  -1   1   21.00    4.20
   7  -1   1   23.30    3.90
  -7  -1  -1   16.40    3.40
   7   1   1   11.40    3.20
  -7   1  -1   15.90    3.70
   7   1   1    9.90    2.70
  -7   1  -1   17.00    4.00
  -9  -1  -1  948.51   70.99
   9  -1   1 1129.09   71.59
   9  -1   1 1014.50   70.89
  -9  -1  -1 1028.90   70.99
  -9   1  -1 1134.89   71.79
  -9   1  -1 1074.69   70.99
   9   1   1  991.40   70.69
   9   1   1 1110.19   70.99
 -11  -1  -1   73.49    8.70
  11  -1   1   86.79    9.60
 -11  -1  -1   74.89    8.90
  11  -1   1   95.09    8.70
  11   1   1  101.49    8.80
 -11   1  -1  117.89   10.10
 -11   1  -1  108.19    9.20
  11   1   1  101.59    8.60
 -13  -1  -1  214.58   17.80
  13  -1   1  211.48   17.20
 -13  -1  -1  229.48   18.30
  13  -1   1  235.88   18.40
  13   1   1  229.98   17.40
  13   1   1  245.48   17.80
 -13   1  -1  232.08   17.90
 -13   1  -1  265.57   19.00
 -15  -1  -1  159.48   13.00
 -15  -1  -1  169.68   12.70
  15  -1   1  143.09   12.90
  15  -1   1  150.78   11.80
  15   1   1  142.59   11.90
 -15   1  -1  117.09   12.10
  15   1   1  128.69   12.10
 -15   1  -1  114.09   13.10
 -17  -1  -1   80.19    8.60
  17  -1   1   63.79    8.50
  17  -1   1   59.49    7.60
 -17   1  -1   50.59    8.10
 -17   1  -1   51.19    9.00
  17   1   1   86.49    8.50
  19  -1   1  182.68   15.50
  19  -1   1  185.38   11.20
 -19  -1  -1  170.48   15.60
  19  -1   1  196.88   14.10
 -19  -1  -1  164.48   14.80
 -19   1  -1  155.18   15.70
  19   1   1  145.09   13.70
 -19   1  -1  156.38   14.50
  19   1   1  144.79   11.20
  19   1   1  152.68   14.60
  21  -1   1  427.56   31.60
  21  -1   1  444.46   29.20
  21  -1   1  450.05   33.30
 -21  -1  -1  411.66   29.10
 -21  -1  -1  438.16   32.60
 -21  -1  -1  438.36   33.60
 -21   1  -1  443.26   34.10
  21   1   1  438.86   31.70
  21   1   1  446.76   29.20
 -21   1  -1  428.16   32.50
  21   1   1  471.85   32.90
  23  -1   1  206.78   15.70
  23  -1   1  187.58   12.20
  23  -1   1  194.88   12.30
 -23  -1  -1  158.98   12.20
 -23  -1  -1  180.88   16.80
 -23  -1  -1  193.68   17.70
  23   1   1  208.88   17.00
  23   1   1  181.28   12.30
 -23   1  -1  204.88   18.60
 -23   1  -1  185.48   16.70
  23   1   1  170.98   15.50
 -23   1  -1  165.08   12.20
 -25  -1  -1   60.39   10.00
  25  -1   1   61.29    4.30
  25  -1   1   65.29    9.70
 -25  -1  -1   64.59   10.80
  25  -1   1   59.89    4.00
  25  -1   1   63.29    8.20
 -25  -1  -1   53.39    4.20
 -25   1  -1   51.99    4.10
  25   1   1   38.80    7.80
 -25   1  -1   57.89   11.10
  25   1   1   49.20    4.30
 -25   1  -1   53.79    9.80
  25   1   1   53.89    8.80
 -27  -1  -1   36.40    8.70
 -27  -1  -1   35.80    3.20
  27  -1   1   36.00    3.40
  27  -1   1   48.60    9.50
 -27  -1  -1   44.50   10.10
  27  -1   1   38.00    3.00
  27  -1   1   35.80    7.40
 -27   1  -1   36.50    3.20
  27   1   1   39.70    3.40
 -27   1  -1   41.30   10.40
  27   1   1   38.80    3.10
  27   1   1   45.10    8.60
  27   1   1   37.40    7.50
 -27   1  -1   35.40    8.50
  29  -1   1  145.39   15.30
  29  -1   1  133.59    9.20
 -29  -1  -1  134.89    9.10
 -29  -1  -1  138.89   15.20
 -29  -1  -1  137.09   15.70
  29  -1   1  126.39    9.00
  29  -1   1  134.29   13.30
 -29   1  -1  101.49   15.30
 -29   1  -1  115.59    9.00
  29   1   1  146.39   13.60
  29   1   1  133.29    9.10
 -29   1  -1  119.59   14.60
  29   1   1  158.68   14.60
  29   1   1  139.79    9.00
  31  -1   1   26.70    7.90
  31  -1   1   21.90    7.10
 -31  -1  -1   22.80    2.60
  31  -1   1   20.10    2.30
  31  -1   1   20.90    2.70
 -31  -1  -1   22.40    8.60
 -31  -1  -1   20.70    9.00
  31   1   1   13.80    6.40
 -31   1  -1   12.60    7.80
  31   1   1   17.20    2.40
  31   1   1   25.90    7.60
 -31   1  -1   18.30    8.70
 -31   1  -1   18.50    2.60
  31   1   1   19.30    2.70
 -33  -1  -1    3.70    2.10
  33  -1   1    2.60    5.60
 -33  -1  -1    4.10    7.00
  33  -1   1    0.90    1.70
  33  -1   1    1.00    2.00
 -33  -1  -1    2.20    7.00
  33  -1   1    1.80    5.90
  33   1   1    1.10    2.10
  33   1   1    1.30    5.60
  33   1   1   -1.30    5.70
  33   1   1    1.50    1.70
 -33   1  -1   -2.30    7.00
 -33   1  -1    2.80    2.10
 -33   1  -1    6.10    8.10
 -35  -1  -1   25.70    2.90
  35  -1   1   14.70    7.20
 -35  -1  -1   14.60    8.00
  35  -1   1   17.40    2.50
  35  -1   1   17.70    2.80
  35   1   1   24.50    2.90
  35   1   1   27.00    8.70
  35   1   1   24.20    2.60
 -35   1  -1   21.30    9.60
 -35   1  -1   18.90    2.80
  37  -1   1    0.70    6.70
 -37  -1  -1    6.10    2.40
 -37  -1  -1    8.20    8.10
  37  -1   1    5.10    1.90
  37  -1   1    8.30    2.30
  37   1   1    0.10    6.40
  37   1   1    4.40    2.30
 -37   1  -1    4.40    2.40
 -37   1  -1    3.50    8.50
  37   1   1    8.70    2.00
  39  -1   1    3.80    1.90
  39  -1   1    3.10    2.20
 -39  -1  -1    9.30    2.60
  39   1   1    0.50    2.00
 -39   1  -1    7.20    2.50
  39   1   1    4.50    2.30
  41  -1   1    3.60    2.00
 -41  -1  -1    1.20    2.70
  41  -1   1    2.90    2.40
  41   1   1    2.20    2.30
  41   1   1    1.60    2.00
 -41   1  -1    6.00    2.80
 -43  -1  -1    8.50    2.90
  43  -1   1   10.80    2.50
  43   1   1    8.80    2.80
  43   1   1    9.90    2.50
 -45  -1  -1   13.80    3.10
  45  -1   1   10.50    2.70
  45   1   1    8.90    2.70
  47  -1   1    8.30    2.60
  47   1   1    7.80    2.70
  48  -2  -1    0.10    2.50
  48   2  -1   -0.60    2.40
  48   2  -1    1.10    2.50
  46  -2  -1    2.50    2.20
  46  -2  -1    2.40    2.40
  46   2  -1    2.20    2.50
  46   2  -1    3.70    2.50
  44  -2  -1   16.20    2.90
 -44  -2   1   18.50    3.30
  44  -2  -1   14.30    2.60
  44   2  -1   12.90    2.60
  44   2  -1    9.60    2.60
  42  -2  -1    4.30    2.30
 -42  -2   1    5.20    2.60
  42  -2  -1    2.80    2.10
  42   2  -1    1.50    2.10
  42   2  -1    2.80    2.40
  40  -2  -1    4.80    2.10
  40  -2  -1    1.70    2.10
 -40  -2   1    3.90    2.60
  40   2  -1    3.50    2.30
  40   2  -1    6.30    2.20
 -38  -2   1   12.00    8.30
  38  -2  -1   11.70    2.50
  38  -2  -1   14.50    2.40
 -38  -2   1   16.70    2.70
  38   2  -1   20.60    2.60
  38   2  -1   17.90    2.80
 -36  -2   1    5.60    2.20
  36  -2  -1    1.00    1.80
  36  -2  -1    1.60    9.50
  36  -2  -1    2.10    1.90
 -36  -2   1    6.20    7.60
  36   2  -1    2.90    2.10
 -36   2   1    4.00    2.80
  36   2  -1   -0.40    6.60
  36   2  -1    2.10    2.10
 -34  -2   1   10.40    7.60
  34  -2  -1    2.20    6.00
 -34  -2   1    3.60    2.10
  34  -2  -1    7.80    1.90
  34  -2  -1    6.40    2.10
  34   2  -1    5.30    2.00
 -34   2   1    3.60    7.00
  34   2  -1    7.20    6.90
  34   2  -1    6.40    2.10
 -34   2   1    6.80    2.20
  32  -2  -1   25.40    2.50
  32  -2  -1   30.70    7.80
 -32  -2   1   21.20    2.60
 -32  -2   1   17.50    7.40
  32  -2  -1   25.70    2.70
 -32  -2   1   27.50    9.20
 -32   2   1   24.50    2.60
  32   2  -1   15.90    6.70
 -32   2   1   17.50    7.60
  32   2  -1   15.90    2.70
  32   2  -1   18.40    2.60
  32   2  -1   20.90    8.20
  30  -2  -1   21.30    6.40
 -30  -2   1   13.30    7.30
 -30  -2   1    9.80    6.60
 -30  -2   1   22.50    2.40
  30  -2  -1   18.10    2.30
  30  -2  -1   17.80    2.40
  30  -2  -1   21.90    7.60
  30   2  -1   16.70    6.80
  30   2  -1   15.70    2.20
  30   2  -1   17.10    6.80
 -30   2   1   23.60    2.40
 -30   2   1   19.20    7.70
 -30   2   1   12.10    7.40
  30   2  -1   13.50    2.50
  28  -2  -1   52.69    8.10
  28  -2  -1   47.00    3.70
 -28  -2   1   44.00    3.50
 -28  -2   1   42.10    9.60
  28  -2  -1   50.29    3.50
  28  -2  -1   35.30    8.70
 -28  -2   1   26.10    7.30
  28   2  -1   40.80    8.70
 -28   2   1   47.80   10.40
 -28   2   1   47.10    3.50
  28   2  -1   40.90    3.70
  28   2  -1   40.40    3.60
 -28   2   1   46.30    9.00
  28   2  -1   48.50    9.30
 -26  -2   1  143.19   14.40
 -26  -2   1  143.09   10.50
  26  -2  -1  154.08   10.60
 -26  -2   1  164.18   16.40
  26  -2  -1  162.58   15.80
  26  -2  -1  172.08   14.10
  26  -2  -1  151.18   10.50
  26   2  -1  158.58   10.60
 -26   2   1  152.78   14.80
  26   2  -1  157.78   10.60
  26   2  -1  159.48   15.30
  26   2  -1  163.28   15.00
 -26   2   1  160.08   17.40
  24  -2  -1  123.29   10.50
  24  -2  -1  102.19    6.70
 -24  -2   1  100.49   12.10
  24  -2  -1  111.59   12.40
 -24  -2   1   87.29    6.60
  24  -2  -1   95.49    6.60
 -24  -2   1   86.49   10.50
  24   2  -1   91.09   10.90
 -24   2   1  112.49   13.40
  24   2  -1   90.39    6.60
  24   2  -1  100.39   11.10
 -24   2   1   90.89   10.70
  24   2  -1   88.69    6.70
  22  -2  -1   81.59    6.00
  22  -2  -1   93.69    6.10
 -22  -2   1   90.09   11.50
 -22  -2   1   84.19    6.00
  22  -2  -1   93.59   10.90
  22  -2  -1   96.59    9.10
 -22  -2   1   75.69    9.50
  22   2  -1   89.69   10.20
  22   2  -1   93.99    6.20
  22   2  -1   78.49    6.10
  22   2  -1   82.99    9.80
 -22   2   1  108.39   12.50
 -22   2   1   83.39    9.70
  20  -2  -1  288.27   24.00
 -20  -2   1  290.17   24.10
 -20  -2   1  308.67   22.80
  20  -2  -1  261.97   20.00
  20  -2  -1  303.27   22.30
  20  -2  -1  311.17   20.00
  20   2  -1  314.37   20.00
 -20   2   1  314.07   25.20
 -20   2   1  287.77   22.50
  20   2  -1  322.77   23.10
  20   2  -1  319.37   23.80
  18  -2  -1  194.28   14.10
  18  -2  -1  183.58   11.90
  18  -2  -1  163.08   15.50
 -18  -2   1  172.28   15.80
 -18  -2   1  160.48   14.30
 -18   2   1  180.58   14.30
  18   2  -1  166.68   14.50
 -18   2   1  188.78   16.90
  18   2  -1  173.58   15.30
  16  -2  -1   21.40    4.00
 -16  -2   1   13.10    4.10
  16  -2  -1   16.40    5.20
 -16  -2   1   12.50    4.80
  16   2  -1   11.30    4.50
  16   2  -1   17.60    4.60
 -16   2   1   13.70    3.90
 -16   2   1   18.80    5.90
 -14  -2   1   34.80    6.30
 -14  -2   1   34.40    5.30
  14  -2  -1   43.60    4.70
  14  -2  -1   36.90    6.40
  14   2  -1   23.70    5.00
  14   2  -1   29.70    5.60
 -14   2   1   32.20    4.90
 -14   2   1   37.70    7.10
 -12  -2   1   60.89    7.00
 -12  -2   1   63.19    6.10
  12  -2  -1   57.29    5.10
  12  -2  -1   52.59    7.10
 -12   2   1   43.20    7.60
  12   2  -1   38.90    6.10
 -12   2   1   50.79    5.30
  12   2  -1   36.90    6.10
 -10  -2   1   34.90    5.90
  10  -2  -1   46.70    6.20
 -10  -2   1   46.10    5.20
  10   2  -1   30.70    5.60
  10   2  -1   37.30    5.60
 -10   2   1   33.50    6.50
  -8  -2   1 2245.38  162.08
   8  -2  -1 2326.77  162.78
   8  -2  -1 2495.95  161.78
  -8  -2   1 2452.45  162.78
   8   2  -1 2572.84  162.38
  -8   2   1 2455.15  163.18
  -8   2   1 2369.06  161.38
   8   2  -1 2611.04  162.78
  -6  -2   1  483.25   36.20
   6  -2  -1  598.14   37.00
  -6   2   1  573.94   36.90
   6   2  -1  481.95   36.20
  -4  -2   1 1038.60   70.19
   4  -2  -1 1118.99   70.69
  -4  -2   1  971.70   70.69
   4   2  -1  970.20   70.69
   4   2  -1 1132.09   70.29
  -4   2   1 1073.59   70.69
  -2  -2   1  585.54   39.20
   2   2  -1  529.85   39.60
  -2   2   1  618.34   38.70
  -2   2   1  592.04   39.30
   0  -2   1 1399.36   93.89
   0   2   1 1455.75   93.69
   0   2  -1 1384.16   94.29
   4  -2   1  219.58   16.80
   4  -2   1  206.08   16.50
  -4  -2  -1  265.17   16.40
   4   2   1  258.17   16.30
  -4   2  -1  187.18   16.40
  -4   2  -1  211.78   16.90
   4   2   1  248.68   15.70
   6  -2   1 1210.48   87.69
   6  -2   1 1299.17   88.29
  -6  -2  -1 1396.36   87.29
  -6  -2  -1 1378.56   87.79
   6   2   1 1397.86   87.29
  -6   2  -1 1229.28   88.19
   6   2   1 1368.56   87.59
  -6   2  -1 1199.78   87.69
  -8  -2  -1  996.60   65.69
   8  -2   1  880.31   65.49
   8  -2   1 1021.10   66.59
  -8  -2  -1  956.80   65.39
  -8   2  -1  960.70   65.79
   8   2   1 1023.10   65.59
  -8   2  -1  979.90   66.49
   8   2   1  973.70   65.39
  10  -2   1 1947.61  135.09
  10  -2   1 2131.39  136.39
 -10  -2  -1 2185.58  135.39
 -10  -2  -1 1957.10  135.29
 -10   2  -1 2028.20  136.19
  10   2   1 2137.19  135.29
  10   2   1 1992.70  135.19
 -10   2  -1 1836.92  135.19
 -12  -2  -1   62.69    7.50
 -12  -2  -1   72.59    7.50
 -12   2  -1   71.09    9.10
 -12   2  -1   62.09    7.80
 -14  -2  -1  412.16   29.00
 -14  -2  -1  404.16   29.20
  14  -2   1  349.77   28.30
  14  -2   1  365.86   29.70
 -14   2  -1  394.96   30.20
  14   2   1  440.96   29.00
 -14   2  -1  386.46   29.00
  14   2   1  455.75   28.80
  16  -2   1   38.30    7.50
  16  -2   1   37.40    6.30
 -16  -2  -1   35.00    6.90
 -16  -2  -1   35.90    6.90
  16   2   1   49.00    6.60
 -16   2  -1   56.99    7.40
  16   2   1   51.49    6.50
 -16   2  -1   57.69    8.70
  18  -2   1  113.09   10.30
  18  -2   1  106.29    7.80
  18  -2   1  120.59   12.10
 -18  -2  -1  115.09   11.70
 -18  -2  -1  118.99   11.40
  18   2   1  110.39   10.60
 -18   2  -1  111.29   11.40
  18   2   1  131.29   11.50
 -18   2  -1  112.89   12.60
  20  -2   1  426.16   26.70
 -20  -2  -1  367.96   26.60
  20  -2   1  431.46   30.90
 -20  -2  -1  387.06   30.10
  20  -2   1  441.46   29.20
 -20  -2  -1  377.16   30.30
  20   2   1  357.76   26.70
  20   2   1  407.56   30.00
  20   2   1  386.16   29.30
 -20   2  -1  427.16   31.80
 -20   2  -1  440.66   30.40
  22  -2   1   15.30    2.20
  22  -2   1   19.10    6.40
 -22  -2  -1   27.80    7.50
  22  -2   1   13.90    5.10
 -22  -2  -1   20.90    6.40
  22  -2   1   12.80    1.80
  22   2   1   33.30    6.30
  22   2   1   33.10    6.80
 -22   2  -1   24.60    7.60
 -22   2  -1   13.90    6.40
 -24  -2  -1   27.70    7.40
  24  -2   1   29.10    7.90
 -24  -2  -1   27.30    8.20
  24  -2   1   25.30    2.90
  24  -2   1   25.50    6.10
 -24   2  -1   30.40    8.80
  24   2   1   30.70    7.10
  24   2   1   28.00    2.60
 -24   2  -1   24.50    7.60
  24   2   1   32.00    6.70
 -24   2  -1   29.50    2.60
  24   2   1   36.90    2.90
  26  -2   1   71.89   10.70
  26  -2   1   62.69    4.30
 -26  -2  -1   55.69    4.50
  26  -2   1   67.49    4.60
 -26  -2  -1   59.19   10.40
 -26  -2  -1   56.69   10.20
  26  -2   1   71.89    8.70
  26   2   1   61.69    9.20
  26   2   1   68.59    9.60
 -26   2  -1   69.09   11.90
 -26   2  -1   72.89   10.70
 -26   2  -1   57.49    4.40
  26   2   1   52.69    4.40
  26   2   1   57.19    4.60
 -28  -2  -1   79.39   11.60
  28  -2   1   67.09    5.20
  28  -2   1   75.59   10.90
  28  -2   1   67.29    9.30
 -28  -2  -1   70.99    5.00
 -28  -2  -1   76.09   11.90
  28  -2   1   65.39    4.90
 -28   2  -1   74.09   12.50
 -28   2  -1   71.29   11.20
  28   2   1   70.99    5.20
  28   2   1   80.39   10.00
  28   2   1   66.29    5.00
  28   2   1   82.99   10.80
 -28   2  -1   63.99    5.00
  30  -2   1   56.39   10.50
  30  -2   1   47.60    3.70
 -30  -2  -1   43.50   10.60
  30  -2   1   50.79    8.70
  30  -2   1   51.09    4.10
 -30  -2  -1   50.29    4.00
 -30  -2  -1   41.50    9.90
  30   2   1   45.80    3.80
 -30   2  -1   49.30   10.60
  30   2   1   47.70    4.10
 -30   2  -1   49.30   12.00
 -30   2  -1   50.59    4.00
  30   2   1   42.60    8.80
  30   2   1   49.20    9.50
  32  -2   1   20.10    2.80
  32  -2   1   19.20    7.90
 -32  -2  -1   25.50    8.70
 -32  -2  -1   27.00    2.80
 -32  -2  -1   19.40    8.80
  32  -2   1   17.50    2.40
  32  -2   1   16.40    6.60
 -32   2  -1   22.60    2.70
 -32   2  -1   16.80    8.70
  32   2   1   23.40    2.90
 -32   2  -1    9.70    8.20
  32   2   1   36.30    8.50
  32   2   1   25.00    2.60
  32   2   1   18.60    7.40
 -34  -2  -1   14.50    2.50
  34  -2   1   12.20    2.40
  34  -2   1    4.10    6.30
 -34  -2  -1    7.00    7.80
  34  -2   1   12.10    2.00
 -34  -2  -1   14.40    8.40
 -34   2  -1   11.20    8.60
 -34   2  -1   10.20    2.40
  34   2   1    9.20    6.70
  34   2   1   13.70    2.40
  34   2   1   14.10    2.00
  34   2   1    9.00    6.40
  36  -2   1   21.10    2.40
  36  -2   1   20.40    7.50
 -36  -2  -1   22.50    9.50
  36  -2   1   18.70    2.80
 -36  -2  -1   24.90    3.00
  36   2   1   18.00    2.60
  36   2   1   19.60    3.00
 -36   2  -1   28.10    9.80
  36   2   1   16.70    9.70
 -36   2  -1   28.30    3.10
 -38  -2  -1   36.40    3.60
  38  -2   1   34.50    3.60
 -38   2  -1   40.00    3.70
  38   2   1   36.70    3.40
  38   2   1   37.10    3.70
 -40  -2  -1    2.00    2.50
  40  -2   1    1.30    2.20
 -40   2  -1    2.60    3.70
  40   2   1   -0.80    2.00
  40   2   1   -0.30    2.30
  42  -2   1   -1.70    2.30
 -42  -2  -1    2.60    2.70
  42   2   1    0.30    2.10
  42   2   1    0.50    2.40
 -44  -2  -1   14.50    3.20
  44  -2   1   12.90    2.70
  44   2   1   17.30    3.00
 -44   2  -1   14.20    2.90
  46  -2   1    4.80    2.50
 -46  -2  -1    5.40    3.00
  46   2   1    5.00    2.60
  48  -2   1    0.00    2.20
 -48  -2  -1    0.50    4.00
  48   2   1   -0.20    2.60
 -47  -3   1    9.10    5.40
  47  -3  -1    1.20    2.50
  47   3  -1    0.40    2.60
  47   3  -1    3.20    2.40
  45  -3  -1    8.30    2.40
 -45  -3   1   11.70    2.90
  45   3  -1    5.60    2.40
  45   3  -1    7.00    2.60
 -43  -3   1    7.50    2.70
  43  -3  -1    7.80    2.40
  43   3  -1    7.00    2.40
  43   3  -1    6.30    2.50
 -41  -3   1   17.30    2.90
  41  -3  -1   14.10    2.70
  41  -3  -1   16.40    2.70
  41   3  -1   16.90    2.90
  41   3  -1   20.70    2.80
  39  -3  -1    9.60    2.10
  39  -3  -1    8.50    2.40
 -39  -3   1    9.00    2.50
  39   3  -1   10.10    2.50
  39   3  -1   10.80    2.40
  37  -3  -1    1.60    2.00
 -37  -3   1    0.90    2.20
  37  -3  -1    3.80    1.90
  37   3  -1   -0.50    2.10
  37   3  -1   -0.20    2.10
  35  -3  -1    3.10    1.90
  35  -3  -1    3.10    2.10
 -35  -3   1    4.10    2.20
 -35  -3   1   -2.70    6.60
  35   3  -1    4.20    7.40
  35   3  -1    3.00    2.10
  35   3  -1    5.70    2.10
 -33  -3   1    3.10    2.00
  33  -3  -1    1.40    5.70
  33  -3  -1    6.70    2.00
 -33  -3   1    2.60    6.70
 -33  -3   1    8.00    7.00
  33  -3  -1    6.90    1.80
  33   3  -1    1.70    5.20
  33   3  -1    0.80    6.40
  33   3  -1    3.30    1.90
 -33   3   1    5.30    2.10
 -33   3   1    2.30    7.00
  33   3  -1    3.10    2.10
 -31  -3   1   13.40    6.50
  31  -3  -1   20.10    2.40
 -31  -3   1   15.30    2.50
  31  -3  -1   20.50    2.40
  31  -3  -1   26.10    6.70
 -31  -3   1   17.30    8.20
  31   3  -1   19.10    2.50
  31   3  -1   15.70    7.40
  31   3  -1   22.70    7.20
 -31   3   1   17.30    8.70
  31   3  -1   19.10    2.60
 -31   3   1   19.20    7.40
 -31   3   1   25.10    2.40
 -29  -3   1  140.59   16.00
  29  -3  -1  132.89    9.70
  29  -3  -1  143.19   13.70
 -29  -3   1  137.09    9.60
  29  -3  -1  153.68   16.00
  29  -3  -1  137.29    9.60
 -29  -3   1  130.39   14.50
 -29   3   1  133.49    9.60
  29   3  -1  149.69    9.80
  29   3  -1  164.08   15.30
  29   3  -1  160.78   15.40
 -29   3   1  135.59   14.60
 -29   3   1  138.59   17.00
  29   3  -1  150.78    9.70
  27  -3  -1   79.09   11.10
  27  -3  -1   68.29    5.10
 -27  -3   1   74.09    5.10
 -27  -3   1   54.59   10.00
 -27  -3   1   71.59   11.20
  27  -3  -1   66.89    5.00
  27  -3  -1   71.09    8.90
  27   3  -1   66.49    5.20
 -27   3   1   76.19   10.00
  27   3  -1   60.49   10.00
  27   3  -1   78.69   10.20
 -27   3   1   67.79   12.50
  27   3  -1   73.99    5.20
  25  -3  -1   39.90    3.60
  25  -3  -1   41.90    7.10
 -25  -3   1   46.70    8.60
 -25  -3   1   51.59    3.70
  25  -3  -1   42.30    3.70
  25  -3  -1   51.69    9.30
 -25  -3   1   53.79    9.80
 -25   3   1   41.40    8.30
  25   3  -1   68.69    9.10
 -25   3   1   41.60    9.80
  25   3  -1   52.49    3.80
  25   3  -1   49.80    3.80
  25   3  -1   55.19    8.60
  23  -3  -1   54.99    4.30
  23  -3  -1   65.39    9.60
 -23  -3   1   57.29    9.40
  23  -3  -1   61.19    7.50
 -23  -3   1   51.79    8.50
  23  -3  -1   52.79    4.20
 -23  -3   1   53.69    4.20
  23   3  -1   56.49    4.30
  23   3  -1   69.79    9.30
 -23   3   1   59.39   10.70
  23   3  -1   67.39    8.80
 -23   3   1   69.49    9.10
  23   3  -1   63.09    4.30
 -21  -3   1  111.19    7.50
  21  -3  -1  124.79   10.30
  21  -3  -1  108.59    7.60
 -21  -3   1  107.19   11.50
  21  -3  -1  122.09   12.80
 -21  -3   1  120.09   12.90
  21  -3  -1  102.49    7.60
  21   3  -1  124.19   12.00
 -21   3   1  121.69   13.70
  21   3  -1  124.69   12.10
  21   3  -1  115.99    7.80
  21   3  -1   99.19    7.70
 -21   3   1  108.59   11.10
  19  -3  -1   90.69    6.70
 -19  -3   1  106.69    6.70
 -19  -3   1  104.69   11.30
  19  -3  -1   94.49   11.20
 -19  -3   1   98.59   10.00
  19  -3  -1   97.69    8.90
 -19   3   1   83.89   11.80
  19   3  -1  101.89   10.50
  19   3  -1  108.29   10.60
 -19   3   1   85.59    9.50
 -17  -3   1  190.28   16.50
  17  -3  -1  222.98   14.10
 -17  -3   1  216.28   17.90
  17  -3  -1  225.08   15.70
  17  -3  -1  209.08   18.10
  17   3  -1  206.18   17.20
  17   3  -1  199.78   17.10
 -17   3   1  201.88   16.10
 -17   3   1  212.38   18.70
  15  -3  -1   32.70    4.20
 -15  -3   1   33.70    5.80
 -15  -3   1   40.70    7.00
  15  -3  -1   42.00    7.80
  15   3  -1   35.40    6.20
  15   3  -1   37.70    6.10
 -15   3   1   35.70    5.20
 -15   3   1   43.70    8.10
 -13  -3   1   61.09    6.80
  13  -3  -1   53.49    5.30
 -13  -3   1   67.89    7.50
  13  -3  -1   49.80    7.60
  13   3  -1   69.69    7.40
 -13   3   1   48.60    5.90
  13   3  -1   70.29    7.50
 -13   3   1   57.69    8.50
 -11  -3   1   43.70    5.90
 -11  -3   1   36.90    5.40
  11   3  -1   31.00    5.70
  11   3  -1   40.60    5.90
  -9  -3   1   29.10    5.10
   9   3  -1   39.00    5.70
  -7  -3   1  633.04   48.00
   7  -3  -1  764.62   48.60
  -7  -3   1  698.23   47.80
  -7  -3   1  652.83   48.30
   7   3  -1  699.73   47.80
  -7   3   1  766.62   48.80
  -5  -3   1   48.60    4.90
   5  -3  -1   49.30    5.60
  -5  -3   1   48.00    5.70
   5   3  -1   36.50    4.60
  -5   3   1   36.30    5.50
   5   3  -1   39.20    5.70
  -3  -3   1 2531.35  178.68
  -3  -3   1 2797.52  178.18
   3  -3  -1 2765.82  178.48
  -3   3   1 2840.12  178.58
   3   3  -1 2477.05  178.68
   3   3  -1 2701.73  178.18
   1  -3  -1 1105.49   69.49
  -1  -3   1 1057.89   69.29
  -1  -3   1  970.50   69.89
   1   3  -1 1069.19   69.29
  -1   3   1  989.10   69.39
   1   3  -1  956.90   69.79
  -1   3   1 1106.29   68.89
  -1  -3  -1  302.07   19.70
   1  -3   1  278.57   20.60
   1  -3   1  237.48   19.60
  -1   3  -1  274.47   19.70
  -1   3  -1  300.97   20.70
   1   3   1  300.47   19.70
   1   3   1  306.17   19.60
   3  -3   1  258.67   20.00
   3  -3   1  273.07   21.10
  -3  -3  -1  327.37   20.20
   3   3   1  310.27   19.90
  -3   3  -1  268.17   21.10
  -3   3  -1  249.48   20.10
   3   3   1  333.47   20.20
   5  -3   1 1068.09   74.69
   5  -3   1 1206.28   75.49
  -5  -3  -1 1105.09   74.59
  -5   3  -1 1098.79   75.29
   5   3   1 1086.19   74.39
  -7  -3  -1 1847.52  122.79
  -7  -3  -1 1768.02  123.29
   7  -3   1 1687.93  123.19
   7  -3   1 1909.51  124.29
   7   3   1 2045.50  123.09
   7   3   1 1796.12  123.19
  -7   3  -1 1982.60  124.29
  -7   3  -1 1753.22  123.29
   9  -3   1  166.58   14.70
  -9  -3  -1  184.88   14.60
   9  -3   1  179.78   16.00
  -9  -3  -1  188.28   14.10
  -9   3  -1  188.08   15.00
  -9   3  -1  186.78   16.00
   9   3   1  212.88   14.10
   9   3   1  206.28   14.60
 -11  -3  -1  555.44   35.80
 -11  -3  -1  554.24   35.50
  11  -3   1  497.55   36.80
  11  -3   1  428.36   35.10
  11   3   1  529.35   35.40
  11   3   1  575.64   35.50
 -11   3  -1  448.16   35.50
 -11   3  -1  477.55   36.70
  13  -3   1   88.99    9.70
 -13  -3  -1   79.89    8.10
  13  -3   1   83.99    8.00
 -13  -3  -1   78.39    8.30
  13   3   1   75.69    7.90
 -13   3  -1   76.49    9.50
 -13   3  -1   61.79    8.40
  13   3   1   71.89    7.60
 -15  -3  -1  219.08   17.90
  15  -3   1  207.28   17.10
 -15  -3  -1  226.38   17.90
  15  -3   1  208.98   18.90
 -15   3  -1  232.18   19.20
  15   3   1  239.88   17.40
  15   3   1  251.37   17.70
 -15   3  -1  221.28   17.90
  17  -3   1  115.99   11.00
  17  -3   1  128.59   12.70
 -17  -3  -1  144.39   12.10
 -17  -3  -1  111.09   11.60
  17  -3   1  121.19    8.50
 -17   3  -1  108.79   11.70
  17   3   1  134.59   11.30
  17   3   1  136.19   11.60
 -17   3  -1  125.99   13.60
 -19  -3  -1  359.86   26.00
  19  -3   1  321.57   22.30
 -19  -3  -1  306.67   22.20
  19  -3   1  316.07   26.50
  19  -3   1  290.07   24.20
 -19  -3  -1  350.46   25.70
  19   3   1  377.26   25.60
 -19   3  -1  311.17   25.40
  19   3   1  349.27   25.00
 -19   3  -1  319.57   27.20
  19   3   1  379.06   22.30
 -21  -3  -1  206.18   18.10
  21  -3   1  234.38   19.20
  21  -3   1  223.98   17.00
 -21  -3  -1  203.38   18.20
  21  -3   1  222.28   14.10
 -21  -3  -1  204.68   14.00
 -21   3  -1  214.88   18.00
  21   3   1  205.58   17.50
  21   3   1  196.88   17.20
 -21   3  -1  195.58   19.40
  21   3   1  195.38   14.00
  23  -3   1   45.00    8.70
  23  -3   1   48.40    7.30
 -23  -3  -1   46.20    8.70
 -23  -3  -1   34.80    7.70
 -23  -3  -1   44.40    3.50
  23  -3   1   49.30    3.70
  23   3   1   49.80    8.00
  23   3   1   40.90    3.60
 -23   3  -1   43.20    9.90
 -23   3  -1   56.19    9.40
  23   3   1   48.50    8.00
 -25  -3  -1   48.60    9.30
 -25  -3  -1   48.00    9.40
  25  -3   1   50.49    7.60
 -25  -3  -1   47.10    3.50
  25  -3   1   54.49   10.00
  25  -3   1   48.30    3.60
  25   3   1   40.60    3.60
 -25   3  -1   50.69   10.70
  25   3   1   40.70    8.20
  25   3   1   34.80    3.40
  25   3   1   37.80    7.90
 -25   3  -1   46.00    3.50
 -25   3  -1   37.30    8.40
 -27  -3  -1   27.00    8.20
 -27  -3  -1   38.20    3.30
 -27  -3  -1   36.50    9.10
  27  -3   1   41.40    3.50
  27  -3   1   41.20    7.90
  27  -3   1   41.20    9.60
  27   3   1   46.80    8.20
 -27   3  -1   38.20    9.90
 -27   3  -1   40.50    3.30
 -27   3  -1   41.20    9.10
  27   3   1   38.50    3.20
  27   3   1   46.80    8.30
  27   3   1   35.90    3.50
 -29  -3  -1   19.90    2.30
  29  -3   1   14.60    7.40
  29  -3   1   18.10    6.00
 -29  -3  -1   14.60    7.70
 -29  -3  -1   10.30    7.10
  29  -3   1   14.60    2.40
  29   3   1   11.60    2.00
 -29   3  -1   16.80    7.90
  29   3   1   13.80    6.20
  29   3   1   12.00    6.00
  29   3   1   14.50    2.50
 -29   3  -1    9.10    8.00
 -29   3  -1   17.60    2.30
  31  -3   1   21.40    7.90
  31  -3   1   26.60    2.90
 -31  -3  -1   19.90    8.10
 -31  -3  -1   20.80    8.60
  31  -3   1   23.60    6.80
 -31  -3  -1   29.70    2.80
 -31   3  -1   20.10    8.50
  31   3   1   27.90    3.10
  31   3   1   30.50    7.80
  31   3   1   29.30    7.80
 -31   3  -1   23.90    9.60
  31   3   1   24.10    2.70
 -31   3  -1   26.60    2.80
 -33  -3  -1    5.50    2.30
  33  -3   1   -0.50    5.20
  33  -3   1    2.00    2.00
 -33  -3  -1    7.30    7.50
 -33  -3  -1   -1.40    7.20
 -33   3  -1    7.70    2.30
  33   3   1    2.60    1.80
 -33   3  -1    6.70    7.90
  33   3   1    8.10    6.00
  33   3   1    4.70    2.10
  33   3   1    1.50    5.80
 -35  -3  -1   57.69    4.60
  35  -3   1   55.29   10.40
  35  -3   1   55.29    4.50
 -35  -3  -1   45.70   11.70
 -35  -3  -1   35.30   11.00
 -35   3  -1   52.79   12.20
 -35   3  -1   57.69    4.70
  35   3   1   58.59    4.40
  35   3   1   62.69   11.00
  35   3   1   56.59    4.70
  37  -3   1    6.50    2.20
 -37  -3  -1    7.10    2.50
 -37   3  -1   10.20    2.70
  37   3   1    8.30    2.40
  37   3   1    9.10    2.10
 -39  -3  -1   26.20    3.10
  39  -3   1   16.40    2.80
 -39   3  -1   18.00    3.00
  39   3   1   15.00    2.50
  39   3   1   17.40    2.90
 -41  -3  -1    5.50    2.60
  41  -3   1    1.50    2.30
  41   3   1    1.70    2.40
 -41   3  -1    3.20    2.30
  41   3   1    1.60    2.00
  43  -3   1    7.80    2.40
 -43  -3  -1    6.60    2.80
 -43   3  -1    8.80    2.60
  43   3   1    8.20    2.60
 -45  -3  -1    0.50    2.90
  45  -3   1    2.50    2.40
  45   3   1    1.40    2.50
 -45   3  -1    2.20    2.50
  47  -3   1    4.00    2.30
 -47  -3  -1    2.70    3.10
  47   3   1    3.40    2.70
 -48  -4   1    3.50    3.10
 -48   4   1   -2.40    2.70
 -46  -4   1    5.10    2.80
  46  -4  -1    5.10    2.60
 -46   4   1    5.00    2.60
  46   4  -1    1.00    2.50
  46   4  -1    4.20    2.60
 -44  -4   1   20.90    3.40
  44  -4  -1   10.80    2.70
  44   4  -1   12.20    2.60
 -44   4   1   11.00    2.90
  44   4  -1   13.70    2.80
  42  -4  -1    4.30    2.10
 -42  -4   1    1.70    2.50
  42   4  -1    1.40    2.50
  42   4  -1   -1.20    2.40
  40  -4  -1    2.40    2.10
 -40  -4   1    3.90    2.40
  40   4  -1   -0.40    2.30
  40   4  -1    0.10    2.20
  38  -4  -1   11.00    2.30
 -38  -4   1    4.60    2.40
  38   4  -1    6.00    2.30
  38   4  -1    5.80    2.40
  36  -4  -1    3.50    2.10
  36  -4  -1    4.80    1.80
 -36  -4   1    4.10    2.30
  36   4  -1   -2.90    2.00
  36   4  -1   -0.30    2.20
  34  -4  -1    8.70    2.10
  34  -4  -1    9.80    1.90
 -34  -4   1    4.40    6.80
 -34  -4   1    5.30    2.10
  34   4  -1   12.70    7.60
  34   4  -1    9.10    2.30
  34   4  -1    7.10    2.10
  32  -4  -1   12.80    2.00
 -32  -4   1   16.40    2.30
  32  -4  -1    9.90    6.00
  32  -4  -1   10.10    2.20
 -32  -4   1   11.30    7.40
 -32  -4   1   10.60    6.60
  32   4  -1   14.70    6.80
  32   4  -1   18.70    2.60
  32   4  -1   16.10    2.50
 -32   4   1   12.00    7.80
  32   4  -1   12.40    7.30
  30  -4  -1   17.40    2.20
 -30  -4   1   10.30    7.10
 -30  -4   1   11.30    2.20
  30  -4  -1   13.80    2.30
  30  -4  -1   14.30    6.80
  30  -4  -1   14.50    5.70
 -30  -4   1   10.10    6.40
  30   4  -1   12.20    2.10
 -30   4   1   17.80    2.20
 -30   4   1    8.70    7.20
 -30   4   1    9.70    7.10
  30   4  -1    3.70    5.40
  30   4  -1   12.40    2.30
  30   4  -1    7.80    6.80
 -28  -4   1   73.19   11.50
  28  -4  -1   84.99   11.60
 -28  -4   1   74.79   10.70
  28  -4  -1   85.49    9.40
 -28  -4   1   78.39    5.50
  28  -4  -1   75.39    5.60
  28  -4  -1   74.99    5.50
  28   4  -1   87.29   11.70
  28   4  -1   73.89    5.70
  28   4  -1   74.59    5.60
  28   4  -1   89.89   11.30
 -28   4   1   64.79   12.80
 -28   4   1   84.09   10.90
 -26  -4   1   93.59    6.70
 -26  -4   1   80.89   11.40
  26  -4  -1   96.59    6.80
  26  -4  -1   90.19    6.70
 -26  -4   1   85.49   12.30
  26  -4  -1  104.19   12.60
  26  -4  -1  100.79   10.10
 -26   4   1  103.59   14.40
  26   4  -1  102.39    6.90
  26   4  -1   99.49   12.10
  26   4  -1  103.59    6.90
 -26   4   1   97.99   11.50
  26   4  -1  107.89   12.00
  24  -4  -1   15.70    2.40
 -24  -4   1   25.30    2.20
 -24  -4   1   27.10    7.30
  24  -4  -1   24.40    7.30
  24  -4  -1   20.50    5.60
 -24  -4   1   22.70    6.30
 -24   4   1   12.70    6.10
  24   4  -1   28.60    6.80
  24   4  -1   28.50    7.30
  24   4  -1   26.50    2.50
  24   4  -1   22.40    2.50
 -24   4   1   19.80    8.30
 -22  -4   1   40.30    3.20
 -22  -4   1   51.09    9.20
  22  -4  -1   40.40    3.40
 -22  -4   1   39.20    7.80
  22  -4  -1   35.40    3.20
  22  -4  -1   42.80    6.20
  22  -4  -1   50.59    9.50
  22   4  -1   49.40    3.40
 -22   4   1   44.80    7.40
  22   4  -1   61.99    8.60
  22   4  -1   37.90    3.50
 -22   4   1   39.00    9.50
  22   4  -1   69.79    8.90
 -20  -4   1  269.77   19.00
 -20  -4   1  280.47   23.10
  20  -4  -1  321.87   24.20
  20  -4  -1  306.77   19.10
  20  -4  -1  325.37   21.00
 -20  -4   1  269.47   22.00
  20  -4  -1  272.57   19.00
  20   4  -1  276.37   22.80
  20   4  -1  246.68   19.00
 -20   4   1  275.47   21.50
  20   4  -1  324.07   23.00
 -20   4   1  306.47   24.70
  18  -4  -1   64.79    4.50
  18  -4  -1   78.19    9.60
  18  -4  -1   69.39    6.50
  18  -4  -1   58.09    4.40
 -18   4   1   46.80    9.70
 -16  -4   1  147.59   11.70
  16  -4  -1  118.29    8.70
  16  -4  -1  130.89   13.10
  16  -4  -1  128.49    9.90
 -16  -4   1  157.68   12.40
  16   4  -1  134.79   12.20
  16   4  -1  121.39   11.80
 -16   4   1  106.39   13.10
  14  -4  -1   92.69   10.90
  14  -4  -1   94.29    7.70
 -14  -4   1  126.69    9.90
  14   4  -1  120.49   10.30
 -14   4   1   89.19   11.30
 -14   4   1   76.69    8.40
  14   4  -1  121.39   10.30
  12  -4  -1   83.09    9.20
 -12  -4   1   67.39    7.50
 -12  -4   1   74.99    7.90
 -12   4   1   75.49    9.70
 -12   4   1   70.29    6.50
 -10  -4   1  201.98   18.50
  10  -4  -1  262.57   19.20
 -10  -4   1  219.68   17.80
 -10  -4   1  235.78   17.70
 -10   4   1  248.38   19.00
  10   4  -1  236.38   17.70
  -8  -4   1 2166.48  150.78
  -8  -4   1 2400.86  151.18
   8  -4  -1 2392.66  151.88
  -8  -4   1 2286.37  151.58
  -8   4   1 2242.68  151.78
   8   4  -1 2087.99  150.88
   6  -4  -1 1362.36   95.39
  -6  -4   1 1386.16   94.69
  -6  -4   1 1349.66   95.39
  -6   4   1 1494.65   95.69
   6   4  -1 1431.96   95.29
   6   4  -1 1452.75   94.69
  -4  -4   1 1180.78   82.69
   4  -4  -1 1276.47   82.59
  -4  -4   1 1205.18   81.99
  -4   4   1 1264.67   82.69
   4   4  -1 1245.68   81.99
   4   4  -1 1163.98   82.59
   2  -4  -1   17.50    2.60
  -2  -4   1   13.30    3.90
   2  -4  -1   17.00    4.00
  -2  -4   1   21.40    3.60
  -2   4   1   25.70    4.40
   2   4  -1   26.00    4.50
  -2   4   1   26.00    2.80
   2   4  -1   32.60    3.70
   0  -4  -1 1062.49   65.69
   0  -4  -1 1106.79   66.29
   0  -4   1  818.72   66.49
   0   4  -1  822.12   65.79
   0   4   1 1071.79   65.69
   0   4  -1  883.11   66.59
   0   4   1 1114.79   66.29
   2  -4   1 1279.27   87.29
  -2  -4  -1 1200.78   87.19
   2  -4   1 1321.47   88.29
  -2  -4  -1 1346.57   87.29
   2   4   1 1221.08   87.19
  -2   4  -1 1372.16   87.39
   2   4   1 1348.17   87.29
  -2   4  -1 1378.56   88.39
  -4  -4  -1   12.50    2.90
   4   4   1   11.30    2.80
  -6  -4  -1  533.75   41.50
   6  -4   1  704.43   43.30
   6  -4   1  673.93   41.80
   6  -4   1  586.64   42.00
  -6  -4  -1  564.24   41.70
   6   4   1  548.35   41.50
  -6   4  -1  688.83   43.20
   8  -4   1   56.89    7.80
   8  -4   1   70.49    9.30
  -8  -4  -1   77.69    6.40
  -8  -4  -1   75.29    7.30
  -8  -4  -1   73.69    7.10
   8   4   1   59.89    6.80
  -8   4  -1   65.79    9.00
  -8   4  -1   55.19    7.70
 -10  -4  -1  258.47   19.90
  10  -4   1  228.98   21.50
 -10  -4  -1  260.37   20.30
  10   4   1  303.27   20.30
  10   4   1  310.07   20.10
 -10   4  -1  277.67   20.60
 -10   4  -1  286.97   22.00
 -12  -4  -1  128.99   11.60
 -12  -4  -1  123.99   10.90
  12  -4   1  142.69   13.30
  12  -4   1  121.29   11.10
  12   4   1  127.69   11.10
 -12   4  -1  143.09   13.40
 -12   4  -1  127.39   11.70
  12   4   1  146.49   11.20
 -14  -4  -1  275.07   20.80
 -14  -4  -1  283.57   20.80
  14  -4   1  261.57   22.10
  14  -4   1  274.17   20.50
  14   4   1  293.47   20.80
 -14   4  -1  266.17   20.90
 -14   4  -1  261.17   22.40
  14   4   1  283.37   20.80
 -16  -4  -1   65.19    5.10
 -16  -4  -1   59.59    8.20
  16  -4   1   80.99   10.20
  16  -4   1   78.39    5.10
  16  -4   1   79.59    8.10
 -16  -4  -1   64.79    8.30
  16   4   1   67.59    8.00
 -16   4  -1   88.39   10.70
  16   4   1   69.39    8.10
 -16   4  -1   74.89    8.90
 -18  -4  -1  101.99   10.00
  18  -4   1   79.79    5.80
 -18  -4  -1   81.69    9.60
  18  -4   1   66.39    8.50
  18  -4   1   77.59   10.60
 -18  -4  -1   80.39    5.60
 -18   4  -1   65.79    9.60
 -18   4  -1   78.19   11.00
  18   4   1  107.69    9.50
 -20  -4  -1  345.37   27.00
 -20  -4  -1  335.87   23.60
  20  -4   1  385.26   28.70
 -20  -4  -1  380.56   27.50
  20  -4   1  378.66   23.70
  20  -4   1  353.16   26.10
 -20   4  -1  345.27   27.10
 -20   4  -1  342.27   28.70
  20   4   1  377.76   26.90
  20   4   1  371.86   27.00
 -20   4  -1  342.47   23.60
  20   4   1  335.37   23.70
  22  -4   1   50.79    6.90
 -22  -4  -1   52.79    9.30
  22  -4   1   40.70    8.70
 -22  -4  -1   40.50    3.30
 -22  -4  -1   39.10    8.10
  22  -4   1   46.40    3.40
 -22   4  -1   35.30    7.70
  22   4   1   29.50    7.00
  22   4   1   24.00    6.60
 -22   4  -1   28.10    8.70
  24  -4   1   41.60    9.30
 -24  -4  -1   35.50    8.20
  24  -4   1   36.50    3.30
  24  -4   1   36.30    6.90
 -24  -4  -1   37.80    3.20
 -24  -4  -1   45.40    8.70
 -24   4  -1   46.00   10.10
 -24   4  -1   37.60    3.20
  24   4   1   43.70    7.60
  24   4   1   45.20    7.80
  24   4   1   38.90    3.30
  24   4   1   34.80    3.20
 -24   4  -1   41.10    8.40
 -26  -4  -1   67.09   10.10
  26  -4   1   51.99    8.20
 -26  -4  -1   77.19   10.50
  26  -4   1   52.29    9.90
  26  -4   1   53.49    4.10
 -26   4  -1   35.10    9.00
  26   4   1   74.59    9.20
  26   4   1   73.79    9.40
 -26   4  -1   41.10    4.00
 -26   4  -1   47.10    4.00
  26   4   1   58.19    4.00
 -26   4  -1   49.90   10.80
  28  -4   1   63.49   11.30
 -28  -4  -1   73.59    5.20
  28  -4   1   74.39    9.40
  28  -4   1   70.49    5.30
 -28  -4  -1   72.89   11.60
 -28  -4  -1   74.59   11.20
 -28   4  -1   67.69   11.60
  28   4   1   73.49   10.20
 -28   4  -1   59.49   12.60
 -28   4  -1   66.99    5.20
  28   4   1   69.09    5.20
  28   4   1   72.19    5.30
 -28   4  -1   71.99    5.20
  28   4   1   75.39   10.30
  30  -4   1   30.30    9.10
 -30  -4  -1   29.70    9.00
 -30  -4  -1   19.20    8.10
  30  -4   1   33.90    3.30
 -30  -4  -1   41.30    3.30
  30  -4   1   36.20    7.40
  30   4   1   35.50    8.30
 -30   4  -1   38.50    3.30
 -30   4  -1   31.80    9.40
  30   4   1   37.30    3.40
  30   4   1   34.90    8.50
  30   4   1   30.20    3.20
 -30   4  -1   34.80    3.30
 -30   4  -1   32.00   10.10
  32  -4   1   33.80    3.00
 -32  -4  -1   26.10    9.10
 -32  -4  -1   15.60    8.10
  32  -4   1   38.60    8.00
 -32  -4  -1   24.20    2.90
  32   4   1   22.20    7.20
 -32   4  -1   36.80    3.00
 -32   4  -1   30.60    9.70
  32   4   1   27.60    3.20
  32   4   1   21.10    2.80
  32   4   1   22.30    7.50
 -34  -4  -1   15.90   12.90
 -34  -4  -1   13.90    2.60
 -34  -4  -1    6.10    7.80
  34  -4   1   10.20    6.30
  34  -4   1   17.90    2.60
 -34   4  -1   20.80    2.70
  34   4   1   13.20    2.50
  34   4   1   16.70    6.80
  34   4   1   15.90    2.30
 -34   4  -1   18.60    2.60
 -34   4  -1   11.50    8.40
 -36  -4  -1   22.60    3.00
  36  -4   1   20.80    2.80
  36   4   1   17.30    3.00
 -36   4  -1   19.70    2.90
  36   4   1   17.10    2.70
  38  -4   1   40.70    4.00
 -38  -4  -1   46.20    4.10
  38   4   1   47.90    3.90
  38   4   1   42.50    4.20
 -38   4  -1   41.60    4.00
 -40  -4  -1    2.40    2.60
  40  -4   1    1.90    2.20
  40   4   1    1.00    2.40
  40   4   1   -0.90    2.00
 -40   4  -1    2.40    2.30
  42  -4   1   -0.30    2.20
 -42  -4  -1    0.60    2.60
 -42   4  -1    1.50    2.30
  42   4   1    0.20    2.40
  44  -4   1   15.00    2.70
 -44  -4  -1   18.50    3.40
  44   4   1   18.30    3.20
 -44   4  -1   14.60    3.10
 -46  -4  -1    3.40    2.90
  46  -4   1    3.80    2.40
 -46   4  -1    0.20    2.80
  46   4   1    2.80    2.60
 -47  -5   1    5.60    2.90
  47  -5  -1    4.10    2.60
  47   5  -1    4.60    2.80
 -47   5   1    4.20    2.70
  47   5  -1    4.60    2.50
 -45  -5   1    5.70    2.80
  45  -5  -1    4.30    2.50
  45   5  -1    2.60    2.50
  45   5  -1    3.70    2.60
 -45   5   1    3.20    2.40
  43  -5  -1    7.00    2.50
 -43  -5   1   10.10    2.80
  43   5  -1   11.50    2.80
  43   5  -1    5.60    2.40
 -43   5   1    6.20    2.60
  41  -5  -1    8.40    2.40
 -41  -5   1    8.50    2.60
  41   5  -1    8.90    2.60
 -41   5   1    8.50    2.50
  41   5  -1    6.80    2.50
 -39  -5   1    3.30    2.40
  39  -5  -1    3.40    2.10
  39   5  -1   -0.80    2.10
  39   5  -1    0.00    2.30
 -39   5   1    2.90    2.30
 -37  -5   1    4.30    2.40
  37  -5  -1    4.40    2.00
  37   5  -1    0.30    2.30
  37   5  -1    2.60    2.10
  35  -5  -1   43.20    3.90
 -35  -5   1   41.60    3.90
  35   5  -1   45.90    4.00
  35   5  -1   49.40    4.00
 -33  -5   1    8.10    7.50
  33  -5  -1   13.60    2.30
 -33  -5   1   16.50    2.40
 -33  -5   1   11.90    7.50
  33   5  -1   14.20    6.60
  33   5  -1   11.70    7.80
  33   5  -1   16.90    2.40
  33   5  -1   18.20    2.60
 -31  -5   1    6.90    6.30
 -31  -5   1    7.40    6.60
 -31  -5   1   16.10    2.20
  31  -5  -1   10.20    5.70
  31  -5  -1   13.30    2.20
  31   5  -1   16.60    7.50
  31   5  -1   14.30    2.40
  31   5  -1   14.10    2.30
 -31   5   1    5.50    6.90
  31   5  -1    8.00    5.70
 -29  -5   1   32.30    8.30
  29  -5  -1   16.50    2.50
 -29  -5   1   24.70    7.60
  29  -5  -1   16.40    7.00
  29  -5  -1   21.70    6.00
 -29   5   1   19.60    8.90
  29   5  -1   31.50    8.30
 -29   5   1   13.10    7.20
  29   5  -1   26.60    7.10
  27  -5  -1   89.79   12.40
  27  -5  -1   92.39    9.40
 -27  -5   1   69.19   11.50
 -27  -5   1   66.79    5.50
  27  -5  -1   89.39    5.70
 -27  -5   1   65.69   10.30
  27   5  -1   78.89    5.70
  27   5  -1   74.39   11.10
 -27   5   1   88.89   11.00
 -27   5   1   73.09   13.00
  27   5  -1   80.99   11.10
  27   5  -1   75.49    5.70
 -25  -5   1   43.00    3.40
 -25  -5   1   54.19    9.50
  25  -5  -1   76.29   10.70
 -25  -5   1   44.10    8.80
  25   5  -1   47.50    8.50
 -25   5   1   76.29   11.90
  25   5  -1   34.50    3.60
  25   5  -1   41.90    9.00
  25   5  -1   45.00    3.60
  23  -5  -1   35.20    8.20
 -23  -5   1   25.10    7.20
 -23  -5   1   13.40    1.90
 -23  -5   1   10.70    5.70
  23   5  -1   19.60    6.60
 -23   5   1   31.50    8.70
  23   5  -1   14.70    2.30
  23   5  -1   10.20    2.00
 -23   5   1   31.90    6.30
  23   5  -1   13.80    5.50
  21  -5  -1  246.18   19.50
  21  -5  -1  226.48   13.90
  21  -5  -1  235.58   15.70
 -21  -5   1  184.58   13.90
 -21  -5   1  213.78   18.40
 -21  -5   1  182.68   17.30
 -21   5   1  221.98   20.20
 -21   5   1  219.78   16.90
  21   5  -1  201.08   18.00
  21   5  -1  205.18   18.20
  21   5  -1  180.48   13.90
 -19  -5   1  334.57   22.80
  19  -5  -1  285.77   23.40
  19  -5  -1  259.87   18.40
 -19  -5   1  294.57   18.40
 -19  -5   1  290.27   21.40
  19  -5  -1  276.97   19.80
  19   5  -1  295.67   22.30
 -19   5   1  230.18   23.30
  19   5  -1  302.27   22.30
  19   5  -1  267.17   18.40
 -19   5   1  224.48   20.40
 -17  -5   1   71.79    8.70
 -17  -5   1   67.19    5.30
  17  -5  -1   77.49   10.40
  17  -5  -1   85.79    6.80
  17  -5  -1   80.49    5.40
 -17  -5   1   87.19    9.60
 -17   5   1   84.29    8.10
 -17   5   1   88.69   11.30
  17   5  -1   78.59    9.30
 -15  -5   1   28.70    5.70
 -15  -5   1   28.60    6.80
  15  -5  -1   30.10    6.80
  15  -5  -1   25.70    2.30
  15  -5  -1   27.20    3.60
 -15  -5   1   33.00    6.00
 -15   5   1   23.20    7.00
 -15   5   1   26.40    4.80
  15   5  -1   32.40    6.30
  13  -5  -1  175.28   14.30
 -13  -5   1  121.49   11.80
 -13  -5   1  132.29   12.30
 -13  -5   1  141.69   13.70
  13   5  -1  143.89   12.80
 -13   5   1  161.58   14.50
 -11  -5   1  101.69   10.90
 -11  -5   1   98.99    9.40
 -11  -5   1  108.49    9.40
  11  -5  -1   95.39   10.70
 -11   5   1   89.49   10.70
  11   5  -1   81.19    9.10
  -9  -5   1  242.28   17.30
  -9  -5   1  210.08   15.90
   9  -5  -1  249.48   17.40
   9   5  -1  162.98   15.80
  -9   5   1  172.48   16.80
  -7  -5   1   69.29    8.00
  -7  -5   1   72.49    9.10
   7  -5  -1   83.59    9.40
  -7   5   1  104.99    9.90
   7   5  -1   73.99    7.80
   7   5  -1   85.79    9.30
  -5  -5   1  331.67   26.60
   5  -5  -1  407.96   27.00
  -5  -5   1  317.97   25.70
   5   5  -1  317.57   26.40
   5   5  -1  355.56   25.80
  -5   5   1  411.86   26.90
  -5   5   1  399.46   24.50
   3  -5  -1 1068.19   68.39
  -3  -5   1 1095.49   69.29
  -3  -5   1 1085.59   70.09
   3  -5  -1 1061.29   69.99
  -3   5   1  924.11   69.49
  -3   5   1  932.21   68.39
   3   5  -1  971.10   69.89
   3   5  -1 1077.59   69.19
  -1  -5   1  636.84   48.80
  -1  -5   1  669.23   47.90
   1  -5  -1  715.03   47.60
   1  -5  -1  778.72   48.70
  -1   5   1  812.42   48.80
   1   5  -1  699.23   49.00
   1   5  -1  613.24   47.80
  -1   5   1  739.93   47.70
   1  -5   1 1964.10  128.89
  -1  -5  -1 1905.01  128.09
   1  -5   1 2003.80  127.79
  -1   5  -1 2034.70  128.99
   1   5   1 1846.32  127.69
   1   5   1 1797.82  127.99
  -1   5  -1 1885.71  127.69
  -3  -5  -1  546.95   38.30
  -3  -5  -1  518.85   38.40
   3  -5   1  649.14   38.40
  -3   5  -1  611.04   38.50
   3   5   1  500.75   38.30
  -3   5  -1  622.24   40.10
   3   5   1  491.85   38.40
  -5  -5  -1  848.02   56.29
   5  -5   1  811.72   55.99
  -5  -5  -1  787.02   56.19
   5  -5   1  853.11   57.79
  -5   5  -1  842.62   57.69
  -5   5  -1  822.42   56.19
   5   5   1  841.22   56.19
   5   5   1  839.42   56.29
   7  -5   1  665.43   43.70
   7  -5   1  662.33   45.40
   7  -5   1  589.74   44.00
  -7  -5  -1  695.43   44.10
  -7  -5  -1  656.03   43.90
   7   5   1  628.54   44.00
   7   5   1  611.74   43.70
  -7   5  -1  601.24   45.30
  -9  -5  -1  100.09    9.60
  -9  -5  -1  101.99    9.60
   9  -5   1   89.09   11.30
  -9  -5  -1  112.19    8.90
  -9   5  -1  115.59   11.90
   9   5   1  105.49    9.30
 -11  -5  -1   96.09    7.80
  11  -5   1   63.19    8.30
 -11  -5  -1   78.59    8.40
 -11  -5  -1   85.49    8.40
  11  -5   1   67.19   10.10
 -11   5  -1   75.99    8.60
 -11   5  -1   75.89   10.40
  13  -5   1   64.29    9.10
  13  -5   1   47.90    7.00
 -13   5  -1   50.79    9.00
 -13   5  -1   50.19    7.30
 -15  -5  -1   71.49    8.50
  15  -5   1   60.99    4.70
  15  -5   1   59.89    7.50
  15  -5   1   69.89   10.20
 -15  -5  -1   73.49    7.70
 -15  -5  -1   66.59    4.60
  15   5   1   80.09    7.80
 -15   5  -1   59.39   10.20
 -15   5  -1   61.39    8.40
  15   5   1   66.49    8.00
  17  -5   1   81.69    9.10
 -17  -5  -1   93.39    6.20
  17  -5   1  100.79   12.00
  17  -5   1   85.39    6.40
 -17  -5  -1   98.49   10.00
 -17  -5  -1  112.09    9.90
 -17   5  -1   72.59    9.90
 -17   5  -1   83.79   12.00
  17   5   1   95.09    9.70
  17   5   1   96.69    9.40
 -19  -5  -1   35.40    7.20
  19  -5   1   48.50    3.60
  19  -5   1   49.80    7.30
  19  -5   1   52.89   10.10
 -19  -5  -1   25.40    6.80
 -19   5  -1   50.59    3.60
  19   5   1   39.30    6.90
  19   5   1   39.40    7.10
 -19   5  -1   56.19   10.60
 -19   5  -1   49.80    8.50
  21  -5   1  373.76   22.70
 -21  -5  -1  305.97   22.60
  21  -5   1  355.76   28.00
 -21  -5  -1  340.77   26.50
 -21  -5  -1  350.36   26.80
  21  -5   1  345.57   25.20
 -21   5  -1  345.27   26.50
  21   5   1  335.77   26.10
  21   5   1  373.26   26.60
 -21   5  -1  335.27   28.60
 -21   5  -1  338.07   22.70
  21   5   1  316.27   22.70
  23  -5   1   53.99   10.10
  23  -5   1   30.10    6.50
 -23  -5  -1   46.80    8.30
 -23  -5  -1   48.80    3.30
 -23  -5  -1   43.30    8.50
  23  -5   1   38.20    3.40
  23   5   1   47.80    8.10
  23   5   1   48.60    7.80
  23   5   1   43.20    3.40
 -23   5  -1   33.10    8.00
 -23   5  -1   38.90    3.40
 -23   5  -1   34.50    9.60
  23   5   1   35.60    3.40
 -25  -5  -1  143.09   14.70
  25  -5   1  127.39   12.30
  25  -5   1  144.69   15.40
  25  -5   1  129.49    9.20
 -25  -5  -1  135.99    9.20
 -25  -5  -1  130.09   14.20
  25   5   1  130.59    9.20
  25   5   1  134.29   13.40
 -25   5  -1  121.49   15.80
 -25   5  -1  133.79    9.20
 -25   5  -1  133.99   14.10
  25   5   1  137.89    9.20
  25   5   1  156.58   13.90
  27  -5   1   61.39    4.70
 -27  -5  -1   59.39   10.80
  27  -5   1   68.39   11.20
  27  -5   1   58.99    8.70
 -27  -5  -1   68.29    4.70
 -27  -5  -1   68.49   10.60
 -27   5  -1   60.99    4.70
 -27   5  -1   55.69    4.70
  27   5   1   76.69   10.20
  27   5   1   60.49   10.00
  27   5   1   66.19    4.70
  27   5   1   62.19    4.80
 -27   5  -1   56.09   10.60
 -27   5  -1   53.19   11.50
  29  -5   1  126.99    8.90
  29  -5   1  135.69   15.80
 -29  -5  -1  110.69   14.30
 -29  -5  -1  119.29    8.80
  29  -5   1  128.89   13.00
 -29  -5  -1  114.09   14.70
  29   5   1  142.79   14.20
 -29   5  -1  140.59    8.90
 -29   5  -1  127.49    8.90
  29   5   1  118.39   14.00
 -29   5  -1  147.39   15.40
  29   5   1  125.19    8.90
  29   5   1  130.79    8.90
 -29   5  -1  128.59   16.80
  31  -5   1   11.40    6.20
  31  -5   1   14.00    2.50
 -31  -5  -1   15.40    2.50
 -31  -5  -1    9.40    7.40
 -31  -5  -1   13.50    7.00
  31   5   1   20.30    6.80
 -31   5  -1   21.10    2.50
  31   5   1   15.90    2.70
 -31   5  -1   10.90    7.60
  31   5   1   16.10    2.30
 -31   5  -1   18.20    2.50
  31   5   1   22.80    7.30
 -33  -5  -1    7.70    2.20
  33  -5   1   -4.00    5.20
 -33  -5  -1   -1.10    6.60
  33  -5   1    2.90    2.10
  33   5   1    3.50    5.60
 -33   5  -1    4.10    7.80
  33   5   1    3.00    2.30
 -33   5  -1    4.10    2.00
  33   5   1    0.40    1.90
 -33   5  -1    5.90    2.90
  35  -5   1   18.30    2.80
 -35  -5  -1   16.00    2.80
 -35  -5  -1    6.80    7.80
  35   5   1   13.20    7.00
  35   5   1   16.50    2.60
  35   5   1   17.50    2.40
 -35   5  -1   20.70    2.90
  37  -5   1    4.60    2.10
 -37  -5  -1    2.10    2.40
 -37   5  -1    4.40    2.40
  37   5   1    1.10    2.00
  37   5   1   -0.30    2.40
 -39  -5  -1    6.80    2.50
  39  -5   1    4.00    2.20
  39   5   1    1.30    2.40
 -39   5  -1    6.20    2.40
  39   5   1   -1.00    2.10
 -41  -5  -1    3.50    2.50
  41  -5   1    3.40    2.30
  41   5   1    4.10    2.50
 -41   5  -1    7.40    2.50
 -43  -5  -1    8.20    2.90
  43  -5   1    7.60    2.30
  43   5   1    9.50    2.70
 -43   5  -1    6.50    2.60
  45  -5   1    9.10    2.50
 -45  -5  -1    7.10    2.80
  45   5   1    5.00    2.70
 -45   5  -1    7.20    2.70
  47  -5   1    1.30    2.40
 -47  -5  -1    1.90    3.00
  47   5   1    1.60    2.70
 -47   5  -1    2.10    2.90
  46  -6  -1    3.90    2.60
 -46  -6   1    3.40    2.70
  46   6  -1    2.70    2.60
  46   6  -1    4.00    2.70
 -46   6   1    1.00    2.80
 -44  -6   1    9.90    2.70
  44  -6  -1    5.70    2.50
 -44   6   1    6.40    2.70
  44   6  -1    4.00    2.50
  44   6  -1    4.40    2.80
  42  -6  -1    5.20    2.40
 -42  -6   1    6.50    2.60
  42   6  -1    3.70    2.40
 -42   6   1    7.80    2.60
  42   6  -1    3.80    2.60
  40  -6  -1    3.20    2.30
 -40  -6   1    2.80    2.30
  40   6  -1   -1.30    2.20
  40   6  -1    1.00    2.30
 -40   6   1    1.60    2.20
  38  -6  -1    8.20    2.40
 -38  -6   1   12.00    2.60
  38   6  -1   11.80    2.50
  38   6  -1    9.60    2.50
 -38   6   1   13.60    2.50
  36  -6  -1   14.00    2.60
 -36  -6   1   15.20    2.70
  36   6  -1   11.20    2.60
  36   6  -1   12.30    2.50
 -36   6   1   14.70    2.50
  34  -6  -1   11.90    2.20
 -34  -6   1   10.60    2.30
 -34   6   1   11.00    2.40
  34   6  -1   13.60    2.50
  34   6  -1   13.60    2.40
 -32  -6   1   43.50    3.60
 -32  -6   1   36.50   10.10
  32  -6  -1   39.40    3.50
 -32  -6   1   29.80    8.90
 -32   6   1   45.70    3.70
  32   6  -1   41.20   12.20
  32   6  -1   39.90    3.80
  32   6  -1   44.80    3.90
  32   6  -1   40.60    9.40
  30  -6  -1    5.30    4.80
  30  -6  -1    4.80    1.80
 -30  -6   1    7.40    6.50
 -30  -6   1    2.70    6.30
 -30  -6   1    8.10    2.00
  30   6  -1    4.00    5.10
 -30   6   1    6.10    6.80
  30   6  -1    7.30    2.10
 -30   6   1    8.10    2.00
  30   6  -1    1.90    6.40
  30   6  -1    8.00    2.00
 -28  -6   1   26.00    8.40
  28  -6  -1   20.20    7.80
 -28  -6   1   24.40    2.40
 -28  -6   1   14.80    6.50
  28  -6  -1   24.80    6.00
  28  -6  -1   22.80    2.50
 -28   6   1   10.70    6.70
  28   6  -1   15.80    2.70
  28   6  -1   24.90    7.70
  28   6  -1   19.80    2.70
 -28   6   1   22.80    9.20
 -28   6   1   22.60    2.60
  28   6  -1   18.10    6.70
 -26  -6   1   36.10    2.80
  26  -6  -1   30.60    2.90
 -26  -6   1   26.90    7.20
  26  -6  -1   31.60    6.10
 -26  -6   1   27.00    8.10
  26  -6  -1   25.40    8.40
  26   6  -1   34.00    3.00
  26   6  -1   31.00    8.10
 -26   6   1   27.70    9.40
  26   6  -1   30.10    7.90
 -26   6   1   28.40    3.00
 -26   6   1   23.10    7.10
  26   6  -1   28.90    3.00
 -24  -6   1  140.39   15.40
  24  -6  -1  167.98   16.80
 -24  -6   1  139.49   10.50
  24  -6  -1  159.98   10.50
  24  -6  -1  177.38   13.00
 -24  -6   1  133.59   14.40
 -24   6   1  168.78   17.90
  24   6  -1  147.79   10.60
 -24   6   1  164.38   10.60
  24   6  -1  170.58   15.30
  24   6  -1  141.19   15.20
 -24   6   1  160.78   14.10
  24   6  -1  154.98   10.60
 -22  -6   1  137.89   14.60
 -22  -6   1  125.99    9.70
  22  -6  -1  176.18   11.90
  22  -6  -1  150.68    9.70
  22  -6  -1  174.68   15.90
 -22  -6   1  123.89   13.60
 -22   6   1  153.48    9.80
 -22   6   1  163.78   13.10
  22   6  -1  122.99   14.20
 -22   6   1  157.88   16.90
  22   6  -1  120.99    9.80
  20  -6  -1  550.74   40.30
  20  -6  -1  553.34   35.20
 -20  -6   1  497.35   35.20
 -20  -6   1  521.65   38.10
 -20  -6   1  543.85   39.00
  20  -6  -1  547.25   36.50
 -20   6   1  509.75   35.20
 -20   6   1  496.35   37.20
 -20   6   1  523.95   40.90
  20   6  -1  543.35   35.20
  20   6  -1  571.84   39.30
 -18  -6   1   96.39   10.90
 -18  -6   1   92.29   11.10
  18  -6  -1  112.29    7.50
  18  -6  -1  119.79    8.70
 -18  -6   1   84.29   12.30
  18  -6  -1  114.59   13.00
  18   6  -1  119.49   12.00
 -18   6   1  129.49   10.20
 -18   6   1  141.69   14.40
  18   6  -1   96.29    7.50
  16  -6  -1  108.19   12.30
 -16  -6   1  124.99   11.30
  16  -6  -1  105.99    7.70
 -16  -6   1  128.39   12.90
 -16  -6   1  126.09   11.30
 -16  -6   1  113.69    7.60
 -16   6   1   85.29   12.80
  16   6  -1  113.79   11.70
  14  -6  -1  134.29    8.70
 -14  -6   1  118.59    8.70
 -14  -6   1  130.79   11.70
 -14  -6   1  143.99   13.60
  14  -6  -1  139.59   13.60
 -14  -6   1  147.69   12.20
 -14   6   1  122.09   13.40
  14   6  -1  132.49   12.20
 -14   6   1  122.49    8.80
  12  -6  -1   73.29    9.70
  12   6  -1   67.09    8.30
 -12   6   1   94.79   10.70
 -10  -6   1  233.88   18.10
  10  -6  -1  259.37   19.70
 -10  -6   1  222.68   19.50
  10   6  -1  244.88   18.50
 -10   6   1  241.58   19.90
  10   6  -1  212.28   18.80
   8  -6  -1  165.08   13.60
  -8  -6   1  132.59   11.70
  -8  -6   1  118.89   12.90
  -8   6   1  169.38   13.90
   8   6  -1  125.79   12.80
   8   6  -1  142.69   12.00
  -6  -6   1   74.19   10.20
  -6  -6   1   90.79    9.20
   6  -6  -1  105.29   10.70
   6   6  -1   88.79   10.10
  -6   6   1  108.19   10.80
   6   6  -1   99.69    9.20
  -6   6   1  106.09    7.40
   4  -6  -1   41.70    7.30
  -4  -6   1   25.40    6.20
  -4  -6   1   43.00    5.60
   4   6  -1   18.90    5.70
  -4   6   1   33.70    3.90
  -4   6   1   39.90    7.50
   4   6  -1   41.60    5.60
   2  -6  -1 2096.29  139.29
   2  -6  -1 1989.20  137.99
  -2  -6   1 2020.70  138.49
  -2  -6   1 1926.91  139.39
  -2   6   1 2145.29  139.39
   2   6  -1 2170.78  138.69
   2   6  -1 2178.38  139.79
  -2   6   1 2101.89  138.19
   0  -6   1   55.29    6.00
   0  -6   1   59.89    8.30
   0   6  -1   51.49    6.00
   0   6  -1   63.19    8.30
   2  -6   1   33.90    7.10
  -2  -6  -1   39.60    5.20
  -2  -6  -1   44.20    6.80
   2  -6   1   32.80    5.10
   2   6   1   54.29    5.60
  -2   6  -1   54.29    5.50
   2   6   1   48.80    6.60
  -2   6  -1   48.60    7.90
  -4  -6  -1  817.82   59.09
  -4  -6  -1  797.42   59.19
   4  -6   1  898.61   60.79
   4  -6   1  815.32   58.89
  -4   6  -1  923.41   59.19
   4   6   1  887.61   59.29
  -4   6  -1  920.41   60.79
   4   6   1  936.81   59.49
   6  -6   1   39.40    7.30
  -6  -6  -1   38.40    5.50
   6  -6   1   31.40    4.90
  -6  -6  -1   23.30    4.90
  -6   6  -1   37.30    7.10
   6   6   1   37.80    5.40
  -6   6  -1   23.10    4.70
   6   6   1   29.50    5.40
   8  -6   1   56.19    6.10
  -8  -6  -1   58.39    7.00
  -8  -6  -1   61.79    6.80
   8  -6   1   53.49    7.10
   8  -6   1   71.79    9.60
   8   6   1   42.30    6.50
   8   6   1   55.89    6.60
  -8   6  -1   52.49    9.30
 -10  -6  -1  119.99    9.40
  10  -6   1   96.29   10.20
  10  -6   1  110.39    9.50
  10  -6   1   97.29   12.00
 -10  -6  -1  116.79   10.20
 -10  -6  -1  128.89   10.80
 -10   6  -1   90.99   12.10
  10   6   1  109.09   10.10
 -12  -6  -1    9.10    4.50
 -12  -6  -1    9.80    3.30
  12  -6   1   18.20    6.40
 -12  -6  -1    9.50    4.50
  12  -6   1   12.10    4.50
 -12   6  -1   17.80    7.00
  12   6   1    9.50    4.00
  14  -6   1  173.38   15.50
 -14  -6  -1  231.48   16.60
  14  -6   1  192.78   13.00
 -14  -6  -1  196.78   13.00
 -14  -6  -1  210.78   16.10
  14  -6   1  200.78   18.00
 -14   6  -1  171.18   17.80
  14   6   1  214.08   16.00
 -14   6  -1  163.98   15.70
 -16  -6  -1   58.99    7.60
  16  -6   1   60.39   10.00
  16  -6   1   63.89    4.30
 -16  -6  -1   50.49    4.20
 -16  -6  -1   57.89    7.90
  16  -6   1   62.19    7.60
 -16  -6  -1   61.59    8.60
 -16   6  -1   60.29   10.30
 -16   6  -1   60.19    4.80
  16   6   1   62.59    8.00
 -16   6  -1   73.99    9.00
 -18  -6  -1  205.78   17.70
  18  -6   1  205.48   16.50
 -18  -6  -1  194.48   13.80
  18  -6   1  190.58   18.90
  18  -6   1  206.18   13.90
 -18  -6  -1  214.88   17.50
  18   6   1  210.38   17.40
 -18   6  -1  205.08   19.50
 -18   6  -1  229.38   18.00
 -18   6  -1  212.38   13.90
 -20  -6  -1  263.57   20.80
  20  -6   1  287.67   23.00
 -20  -6  -1  246.08   20.90
  20  -6   1  267.57   19.90
 -20  -6  -1  237.98   17.10
  20  -6   1  276.67   17.10
  20   6   1  254.57   20.60
 -20   6  -1  258.87   17.10
 -20   6  -1  259.27   21.10
 -20   6  -1  278.17   23.70
  20   6   1  224.28   17.10
  20   6   1  256.87   20.60
  22  -6   1  114.59    7.30
 -22  -6  -1  104.89    7.20
 -22  -6  -1  100.69   11.70
  22  -6   1  108.59   10.70
  22  -6   1  103.09   13.70
 -22  -6  -1  103.39   11.80
 -22   6  -1  102.99   14.00
  22   6   1   92.39    7.30
 -22   6  -1   95.19   12.00
  22   6   1   99.49    7.20
 -22   6  -1  102.59    7.30
  22   6   1  106.89   11.70
  22   6   1  138.19   12.00
  24  -6   1  130.49   15.40
  24  -6   1  126.39    9.50
 -24  -6  -1  151.58   14.60
 -24  -6  -1  133.39   14.50
  24  -6   1  117.49   12.40
 -24  -6  -1  134.09    9.50
 -24   6  -1  134.09    9.60
  24   6   1  166.28   14.20
 -24   6  -1  139.09   14.80
  24   6   1  145.89   14.30
  24   6   1  154.68    9.50
  24   6   1  154.38    9.60
 -24   6  -1  112.99   16.30
 -26  -6  -1   26.70    2.70
  26  -6   1   28.10    8.50
 -26  -6  -1   27.60    7.60
 -26  -6  -1   23.80    7.30
  26  -6   1   35.70    6.60
  26  -6   1   31.50    2.80
  26   6   1   22.30    2.80
  26   6   1   29.30    7.50
  26   6   1   25.50    7.40
 -26   6  -1   21.50    8.90
 -26   6  -1   31.30    2.90
 -26   6  -1   29.00    8.40
  26   6   1   21.70    2.70
  28  -6   1   26.40    6.80
 -28  -6  -1   24.40    8.00
 -28  -6  -1   38.10    3.00
 -28  -6  -1   33.30    8.50
  28  -6   1   29.20    9.10
  28  -6   1   30.90    3.10
  28   6   1   31.50    8.00
  28   6   1   31.10    3.10
  28   6   1   30.90    7.70
 -28   6  -1   28.20    8.60
  28   6   1   32.40    3.20
 -28   6  -1   25.40    9.60
 -28   6  -1   36.20    3.10
 -28   6  -1   28.80    3.20
 -30  -6  -1   46.40    3.70
  30  -6   1   34.00    7.50
 -30  -6  -1   38.80    9.80
  30  -6   1   42.80    3.70
 -30  -6  -1   30.40    9.00
  30   6   1   38.60    3.80
 -30   6  -1   49.30    3.80
  30   6   1   39.60    9.00
  30   6   1   43.20    9.10
 -30   6  -1   43.10    3.80
 -30   6  -1   35.80    9.60
  30   6   1   38.70    3.70
 -32  -6  -1   44.80    3.90
 -32  -6  -1   30.10    9.00
  32  -6   1   28.70    7.70
  32   6   1   45.20    3.80
  32   6   1   51.49    4.10
 -32   6  -1   28.90   10.00
 -32   6  -1   45.20    4.00
  32   6   1   55.19    9.70
 -34  -6  -1    2.80    7.30
 -34  -6  -1    3.40    2.20
  34  -6   1    2.60    2.00
 -34   6  -1    6.20    2.20
  34   6   1    4.80    2.40
  34   6   1    9.20    6.60
  34   6   1    5.80    2.00
 -36  -6  -1    5.80    2.40
  36  -6   1    1.10    2.10
 -36  -6  -1    3.10    7.70
 -36   6  -1    6.10    2.30
  36   6   1    8.20    7.60
  36   6   1    2.50    2.40
  36   6   1    1.60    2.10
 -38  -6  -1    3.90    2.40
  38  -6   1   10.10    2.30
 -38   6  -1   14.10    2.50
  38   6   1    0.70    2.10
  38   6   1    4.90    2.40
 -40  -6  -1    1.80    2.70
  40  -6   1    2.60    2.10
  40   6   1   -1.20    2.40
 -40   6  -1    1.80    2.40
 -42  -6  -1   -0.80    2.60
  42  -6   1    1.80    2.20
  42   6   1   -0.60    2.60
 -42   6  -1    2.50    2.50
 -44  -6  -1   19.90    3.40
  44  -6   1   20.40    2.90
 -44   6  -1   24.30    3.60
  44   6   1   20.80    3.40
 -46  -6  -1   -0.80    2.80
  46  -6   1    2.10    2.30
 -46   6  -1    1.00    2.80
  46   6   1    3.10    2.70
 -47  -7   1    2.10    2.70
  45  -7  -1    9.30    2.50
 -45  -7   1    5.60    2.80
  45   7  -1    5.00    2.70
 -45   7   1    9.50    2.80
  45   7  -1    7.40    3.00
  43  -7  -1    5.20    2.50
 -43  -7   1    9.30    2.70
 -43   7   1    7.30    2.80
  43   7  -1    7.70    2.80
  43   7  -1    5.60    2.40
  41  -7  -1    3.40    2.30
 -41  -7   1    5.80    2.50
 -41   7   1    7.50    2.70
  41   7  -1    2.10    2.50
  41   7  -1    3.00    2.40
 -39  -7   1    6.50    2.40
  39  -7  -1    6.30    2.40
  39   7  -1    3.40    2.50
  39   7  -1    2.20    2.30
 -39   7   1    6.10    2.50
 -37  -7   1   11.70    2.50
  37  -7  -1    6.10    2.40
  37   7  -1    9.90    2.50
  37   7  -1   10.70    2.30
 -37   7   1    8.60    2.50
  35  -7  -1   41.80    3.80
 -35  -7   1   38.50    3.70
  35   7  -1   44.70    3.90
  35   7  -1   42.50    4.00
 -35   7   1   41.30    3.90
 -33  -7   1   15.20    2.50
  33  -7  -1    9.90    2.30
 -33  -7   1    8.70    7.20
  33   7  -1   10.10    2.30
 -33   7   1   10.60    2.30
  33   7  -1    9.50    2.40
 -31  -7   1    8.10   10.00
  31  -7  -1   14.20    2.40
 -31  -7   1    6.10    6.10
 -31  -7   1   10.50    2.20
 -31   7   1   16.30    2.30
  31   7  -1    4.70    2.20
  31   7  -1    5.40    2.10
 -29  -7   1   27.40    8.00
  29  -7  -1   32.20    6.10
 -29  -7   1   22.10    2.40
 -29  -7   1   12.40    6.40
  29   7  -1   15.70    7.60
  29   7  -1   17.80    2.70
  29   7  -1   19.60    2.70
 -29   7   1   25.00    7.90
 -27  -7   1   64.79   12.10
  27  -7  -1   56.79   11.00
 -27  -7   1   65.39   10.30
  27  -7  -1   61.49    8.00
 -27  -7   1   65.89   10.60
 -27  -7   1   68.79    4.60
  27  -7  -1   58.99    4.70
 -27   7   1   61.59    9.80
  27   7  -1   65.49    4.80
 -27   7   1   53.59    4.80
  27   7  -1   63.99    4.80
 -27   7   1   45.20   11.50
  27   7  -1   67.99   11.00
  25  -7  -1   35.70    3.40
 -25  -7   1   43.20    3.30
  25  -7  -1   40.30    9.40
 -25  -7   1   50.49    9.20
 -25  -7   1   34.80    9.60
 -25  -7   1   23.40    7.10
  25  -7  -1   36.20    6.00
  25   7  -1   41.80    3.50
 -25   7   1   42.20    3.50
  25   7  -1   42.40    3.50
 -25   7   1   33.50    9.90
 -25   7   1   42.50    8.10
  25   7  -1   57.69    9.90
  23  -7  -1   19.00    7.70
 -23  -7   1   19.10    6.40
  23  -7  -1   25.30    2.50
 -23  -7   1   20.50    7.90
  23  -7  -1   26.30    4.40
 -23  -7   1   22.90    6.70
 -23   7   1   15.60    5.60
  23   7  -1   17.50    2.40
 -23   7   1   20.60    2.50
  23   7  -1   20.90    2.40
  23   7  -1   22.20    6.90
 -23   7   1   21.60    8.70
 -21  -7   1  163.58   12.90
 -21  -7   1  161.58   16.60
  21  -7  -1  212.88   19.10
 -21  -7   1  171.68   17.10
  21  -7  -1  220.48   14.60
  21  -7  -1  203.08   13.00
 -21  -7   1  165.48   18.20
 -21   7   1  226.18   13.10
 -21   7   1  214.08   19.80
 -21   7   1  194.28   15.70
  21   7  -1  175.58   13.00
  21   7  -1  214.98   18.10
  19  -7  -1  265.07   15.40
 -19  -7   1  209.48   15.30
 -19  -7   1  206.38   18.60
 -19  -7   1  215.28   20.60
  19  -7  -1  245.88   21.00
 -19  -7   1  204.88   19.20
  19   7  -1  232.88   19.80
 -19   7   1  247.08   15.50
  19   7  -1  215.88   15.40
 -19   7   1  241.88   21.70
 -17  -7   1  130.19   12.40
 -17  -7   1  120.49    8.60
  17  -7  -1  132.89   14.40
  17  -7  -1  139.99    8.70
 -17  -7   1  134.99   12.30
 -17  -7   1  141.69   14.40
 -17   7   1  127.19   14.60
  17   7  -1  128.79    8.70
  17   7  -1  124.39   12.70
 -17   7   1  112.69    8.70
  15  -7  -1   53.69    4.40
 -15  -7   1   64.79    4.40
 -15  -7   1   70.19    8.00
  15  -7  -1   60.59   10.00
 -15  -7   1   68.79   10.10
 -15  -7   1   74.49    8.50
 -15   7   1   59.49   10.30
  15   7  -1   64.89    4.60
  15   7  -1   77.69    8.80
 -15   7   1   56.69    4.50
 -13  -7   1  155.08   13.20
 -13  -7   1  155.28   10.20
  13  -7  -1  143.09   10.30
  13  -7  -1  153.78   15.20
 -13  -7   1  178.38   14.00
 -13  -7   1  163.28   15.00
 -13   7   1  145.09   15.40
 -13   7   1  137.59   10.30
  13   7  -1  179.48   14.10
 -11  -7   1   63.39    8.30
  11  -7  -1   70.09   10.20
 -11  -7   1   64.19   10.00
 -11   7   1   76.79   10.30
  11   7  -1   90.79    8.90
  11   7  -1   77.69    9.40
  -9  -7   1   99.69    8.90
  -9  -7   1   80.59   10.40
   9  -7  -1  111.69   10.80
   9   7  -1   78.59    8.60
  -9   7   1   73.89   10.50
   9   7  -1   53.49    9.50
   7  -7  -1  372.26   28.20
   7  -7  -1  362.16   25.40
  -7  -7   1  381.36   27.10
  -7  -7   1  393.76   28.10
   7   7  -1  374.36   27.90
   7   7  -1  386.56   26.90
  -7   7   1  349.47   25.30
  -7   7   1  360.06   28.10
   5  -7  -1  145.79   12.10
  -5  -7   1  114.99   10.20
  -5  -7   1   95.39   10.90
  -5   7   1  116.39   11.70
  -5   7   1  119.09    8.70
   5   7  -1   83.69   10.90
   5   7  -1  100.79    9.70
   3  -7  -1   39.80    5.30
   3  -7  -1   39.50    7.90
  -3  -7   1   71.99    7.00
  -3  -7   1   53.39    8.30
  -3   7   1   57.99    8.80
  -3   7   1   59.49    5.60
   1  -7  -1  444.16   28.40
  -1  -7   1  366.56   28.60
  -1  -7   1  356.56   29.90
   1  -7  -1  465.65   30.20
  -1   7   1  441.06   28.50
   1   7  -1  375.96   30.00
  -1   7   1  445.36   29.80
   1   7  -1  362.46   28.50
   1  -7   1   59.49    6.50
   1  -7   1   59.19    9.00
  -1   7  -1   72.79    9.20
  -1   7  -1   67.99    6.90
   3  -7   1   76.19   11.10
  -3  -7  -1   90.89    8.80
  -3  -7  -1   90.49   10.00
   3   7   1  126.09   10.20
  -3   7  -1  104.79    8.90
   3   7   1  114.59    9.30
  -3   7  -1  117.69   11.50
   5  -7   1  105.99    8.80
  -5  -7  -1   94.39    9.60
  -5  -7  -1   96.19    9.10
   5  -7   1  126.49   12.00
  -5   7  -1  111.29   11.90
  -5   7  -1  105.39    9.00
   5   7   1   97.29    9.20
   5   7   1   97.49    9.60
  -7  -7  -1   59.09    6.70
   7  -7   1   46.70    6.10
   7  -7   1   61.89    9.50
  -7  -7  -1   58.69    7.10
   7   7   1   60.99    7.00
  -7   7  -1   60.89    6.60
  -7   7  -1   55.39    9.50
   7   7   1   63.89    7.10
  -9  -7  -1   45.40    6.30
  -9  -7  -1   39.00    6.60
   9  -7   1   36.70    6.60
   9  -7   1   32.50    5.20
   9  -7   1   42.60    8.50
   9   7   1   42.70    6.20
  -9   7  -1   44.70    8.60
   9   7   1   49.10    6.30
 -11  -7  -1   36.10    6.30
  11  -7   1   31.60    6.30
  11  -7   1   38.90    8.40
 -11  -7  -1   38.00    6.90
 -11  -7  -1   44.50    5.50
  11  -7   1   38.90    5.40
 -11   7  -1   26.90    8.10
  11   7   1   33.00    6.30
  13  -7   1  102.99    8.70
 -13  -7  -1   74.19    9.70
  13  -7   1  111.99   12.20
 -13  -7  -1   71.29    5.60
 -13  -7  -1   80.99    8.20
 -13  -7  -1   77.49    9.10
  13   7   1   87.59    9.20
 -13   7  -1  115.09   12.30
  15  -7   1   36.60    7.00
  15  -7   1   47.00    3.30
  15  -7   1   50.49   10.10
 -15   7  -1   37.30    3.40
 -15   7  -1   31.80    8.50
  17  -7   1  268.37   18.00
  17  -7   1  235.98   20.40
 -17  -7  -1  296.87   21.60
 -17  -7  -1  290.47   18.00
 -17  -7  -1  301.37   22.50
  17  -7   1  278.27   23.60
 -17   7  -1  225.18   23.20
 -17   7  -1  262.77   21.40
  17   7   1  306.57   21.80
 -17   7  -1  243.68   18.00
 -19  -7  -1  402.26   32.70
 -19  -7  -1  445.66   33.40
  19  -7   1  449.46   34.80
 -19  -7  -1  435.96   32.50
  19  -7   1  441.66   31.70
  19  -7   1  457.85   29.10
 -19  -7  -1  408.26   29.10
  19   7   1  442.06   32.80
 -19   7  -1  441.96   32.60
 -19   7  -1  456.55   29.20
 -19   7  -1  440.26   34.80
 -21  -7  -1  479.15   33.50
 -21  -7  -1  462.35   33.40
 -21  -7  -1  507.55   34.50
  21  -7   1  457.55   35.50
  21  -7   1  417.96   29.50
 -21  -7  -1  453.75   29.50
  21  -7   1  398.06   31.90
 -21   7  -1  407.76   35.40
 -21   7  -1  418.96   29.60
  21   7   1  446.56   33.50
  21   7   1  442.26   29.50
 -21   7  -1  429.86   33.20
  21   7   1  478.15   29.50
 -23  -7  -1   46.60    8.80
  23  -7   1   50.59   10.40
  23  -7   1   46.90    3.60
  23  -7   1   46.70    7.60
 -23  -7  -1   46.30    8.70
 -23  -7  -1   44.80    3.50
 -23   7  -1   49.40    9.20
  23   7   1   42.40    8.20
 -23   7  -1   40.70   10.40
 -23   7  -1   49.40    3.70
  23   7   1   40.50    3.50
  23   7   1   35.50    3.50
  25  -7   1   26.50    2.60
 -25  -7  -1   22.40    6.90
 -25  -7  -1   21.00    2.40
  25  -7   1   22.00    5.70
  25  -7   1   29.20    8.80
 -25  -7  -1   13.90    7.00
 -25   7  -1   27.50    9.60
 -25   7  -1   19.60    7.40
  25   7   1   27.00    7.20
  25   7   1   19.80    2.50
  25   7   1   18.40    2.50
 -25   7  -1   26.50    2.70
 -27  -7  -1   10.10    6.40
  27  -7   1    7.10    7.00
  27  -7   1    7.40    2.00
  27  -7   1    7.10    5.10
 -27  -7  -1    8.10    6.20
 -27  -7  -1   12.00    2.10
  27   7   1   12.50    1.90
 -27   7  -1    9.90    8.20
  27   7   1   13.20    2.30
 -27   7  -1   11.80    7.30
 -27   7  -1   10.20    2.00
  27   7   1   10.80    6.00
  27   7   1    7.80    6.00
  29  -7   1   72.89    5.70
  29  -7   1   62.59    9.80
 -29  -7  -1   80.49    5.70
 -29  -7  -1   64.29   11.70
 -29  -7  -1   77.39   12.10
  29   7   1   75.89   11.20
  29   7   1   86.69    5.70
 -29   7  -1   68.19    5.80
  29   7   1   81.79    5.80
  29   7   1   95.79   11.60
 -29   7  -1   72.39   12.00
  31  -7   1   26.30    7.20
  31  -7   1   39.20    3.70
 -31  -7  -1   35.00    9.30
 -31  -7  -1   44.10    3.70
 -31   7  -1   40.60    3.80
 -31   7  -1   32.50   10.30
  31   7   1   47.00    3.70
  31   7   1   39.20    8.60
  31   7   1   41.10    3.70
 -33  -7  -1    4.90    2.20
 -33  -7  -1    1.20    6.50
  33  -7   1    3.00    2.10
  33   7   1   10.90    6.10
 -33   7  -1    5.00    2.20
  33   7   1    7.00    2.10
  33   7   1    5.10    2.20
 -35  -7  -1   19.80    2.80
  35  -7   1   12.20    2.40
 -35  -7  -1   14.60    8.20
 -35   7  -1   18.00    2.90
  35   7   1   15.20    7.20
  35   7   1   17.50    2.80
  35   7   1   19.50    3.10
 -37  -7  -1   12.00    2.60
  37  -7   1   15.30    2.50
  37   7   1    9.40    2.50
  37   7   1   12.30    2.70
 -37   7  -1   13.10    2.60
 -39  -7  -1   15.60    2.90
  39  -7   1   15.60    2.70
  39   7   1   10.30    3.70
  39   7   1   13.80    2.90
 -39   7  -1   20.10    2.90
 -41  -7  -1    1.80    2.70
  41  -7   1    5.80    2.20
 -41   7  -1    9.60    2.70
  41   7   1    1.20    2.60
 -43  -7  -1    8.60    2.80
  43  -7   1    8.90    2.50
 -43   7  -1    7.40    3.00
  43   7   1    8.40    2.80
  45  -7   1    8.00    2.40
 -45  -7  -1    6.90    2.80
  45   7   1    4.00    2.80
 -45   7  -1    2.90    2.90
 -46  -8   1    3.10    2.70
  46  -8  -1    1.50    2.50
  46   8  -1    1.00    2.80
 -46   8   1    4.50    2.90
 -44  -8   1    8.00    2.70
  44  -8  -1    8.20    2.50
 -44   8   1   10.60    2.90
  44   8  -1    7.10    2.60
  42  -8  -1    5.60    2.30
 -42  -8   1    6.40    2.50
 -42   8   1    6.50    2.70
  42   8  -1    3.80    2.60
  42   8  -1    6.00    3.80
 -40  -8   1    4.10    2.50
  40  -8  -1    1.30    2.30
  40   8  -1    2.40    2.60
 -40   8   1    3.60    2.50
  40   8  -1   -1.30    2.40
 -38  -8   1   23.20    2.90
  38  -8  -1   16.00    2.90
  38   8  -1   20.10    3.10
  38   8  -1   17.80    3.20
 -38   8   1   19.30    3.00
 -36  -8   1    6.00    2.30
  36  -8  -1    2.30    2.20
  36   8  -1   -2.20    2.40
  36   8  -1    1.10    2.30
 -36   8   1    4.20    2.30
  34  -8  -1   12.10    2.40
 -34  -8   1   11.80    2.40
 -34   8   1   11.60    2.50
  34   8  -1   13.00    2.40
  34   8  -1    9.80    2.50
 -32  -8   1   24.80    2.90
  32  -8  -1   25.60    2.90
 -32  -8   1   16.40    9.10
 -32  -8   1   21.00    7.90
 -32   8   1   34.60    3.20
  32   8  -1   17.00    3.10
  32   8  -1   21.70    3.00
 -30  -8   1   15.80    8.60
  30  -8  -1   23.90    2.80
 -30  -8   1   21.90    7.60
 -30  -8   1   24.60    2.60
  30   8  -1   19.30    2.80
 -30   8   1   23.30    3.00
  30   8  -1   18.00    2.90
 -28  -8   1    2.20    7.20
 -28  -8   1    2.50    5.80
  28  -8  -1    4.70    4.10
 -28  -8   1    8.20    5.70
  28  -8  -1    5.20    2.10
 -28   8   1   10.00    2.10
 -28   8   1    4.40    7.10
  28   8  -1   11.90    2.20
  28   8  -1    9.90    6.30
 -26  -8   1   57.49   10.00
  26  -8  -1   64.29    4.70
  26  -8  -1   62.39   11.40
 -26  -8   1   62.59   12.10
 -26  -8   1   62.59   10.20
 -26  -8   1   63.29    4.60
  26  -8  -1   58.09    7.40
  26   8  -1   57.49    4.70
 -26   8   1   62.99    4.80
 -26   8   1   76.49    9.60
 -26   8   1   49.10   12.10
  26   8  -1   62.59    4.80
  26   8  -1   66.19   10.10
 -24  -8   1   65.79    4.50
  24  -8  -1   60.29    4.60
 -24  -8   1   64.29    9.60
  24  -8  -1   58.19   11.00
 -24  -8   1   63.49    9.80
 -24  -8   1   62.09   11.40
 -24   8   1   58.49    4.80
 -24   8   1   41.90   11.00
  24   8  -1   59.39    4.60
 -24   8   1   59.99    8.70
  24   8  -1   59.59    4.60
  24   8  -1   65.09   10.00
 -22  -8   1  128.89   15.30
  22  -8  -1  136.79   15.40
 -22  -8   1  130.69    8.60
 -22  -8   1  131.39   13.20
  22  -8  -1  126.89    8.70
 -22  -8   1  144.69   13.90
 -22   8   1  107.79    8.70
 -22   8   1  101.99   15.20
  22   8  -1  135.09   13.40
  22   8  -1  132.39    8.80
 -20  -8   1   24.90    6.50
 -20  -8   1   24.90    8.00
  20  -8  -1   40.00    3.10
  20  -8  -1   37.40    9.10
 -20  -8   1   23.30    6.60
 -20  -8   1   32.60    3.00
 -20   8   1   48.70   11.00
  20   8  -1   38.70    7.90
 -20   8   1   45.00    3.30
  20   8  -1   35.00    3.20
  18  -8  -1  221.98   18.90
 -18  -8   1  175.68   12.50
 -18  -8   1  172.88   15.90
 -18  -8   1  166.68   16.20
 -18  -8   1  166.08   18.10
 -18   8   1  215.78   12.60
  18   8  -1  176.78   12.60
 -18   8   1  218.18   19.70
  18   8  -1  177.88   16.50
 -16  -8   1   81.39    9.40
 -16  -8   1   67.49    9.10
 -16  -8   1   69.79    4.90
 -16  -8   1   65.39   11.30
  16   8  -1   63.19    5.10
  16   8  -1   83.49    9.90
 -14  -8   1  126.19   11.90
 -14  -8   1  111.39   12.00
 -14  -8   1  124.79    8.70
  14  -8  -1  141.09   14.30
  14  -8  -1  135.79    8.70
 -14  -8   1  107.49   14.00
 -14   8   1  152.98   15.10
  14   8  -1  123.99    8.80
  14   8  -1  146.49   13.20
 -12  -8   1   47.90    7.50
 -12  -8   1   46.10    3.90
  12  -8  -1   56.89    3.90
  12  -8  -1   76.59   10.10
 -12  -8   1   37.60    8.10
 -12   8   1   61.59   10.10
 -12   8   1   61.09    4.10
  12   8  -1   56.39    7.90
  12   8  -1   47.20    8.30
 -10  -8   1   87.19   11.10
 -10  -8   1   97.69    6.20
 -10  -8   1  101.99    9.60
  10  -8  -1   68.99   10.70
 -10   8   1   70.89   11.20
  10   8  -1   99.79    9.80
  10   8  -1   72.89   10.30
   8  -8  -1  153.08   12.20
  -8  -8   1  168.78   15.30
  -8  -8   1  158.88   13.80
   8  -8  -1  149.88   15.30
   8   8  -1  193.18   14.20
  -8   8   1  160.88   15.50
   8   8  -1  187.88   15.30
  -8   8   1  162.58   12.20
   6  -8  -1  146.49   13.90
   6  -8  -1  142.89   11.00
  -6  -8   1  135.19   13.50
  -6  -8   1  142.29   12.50
   6   8  -1  135.49   12.30
  -6   8   1  153.28   10.90
   6   8  -1  142.89   13.60
  -6   8   1  156.98   14.30
   4  -8  -1  384.56   24.10
  -4  -8   1  326.57   26.10
   4  -8  -1  399.46   26.60
  -4  -8   1  350.26   25.10
  -4   8   1  332.97   26.30
   4   8  -1  297.17   24.60
  -4   8   1  338.87   23.80
   4   8  -1  292.67   25.90
  -2  -8   1   69.59    9.40
   2  -8  -1   77.19    9.90
  -2  -8   1   74.59    8.20
   2  -8  -1   83.19    7.50
  -2   8   1   80.29    7.60
  -2   8   1   83.49   10.10
   2   8  -1   87.79   10.20
   2   8  -1   93.39    8.40
   0  -8   1   28.90    5.70
   0  -8   1   24.60    7.30
   0  -8  -1   49.90    8.00
   0  -8  -1   51.39    5.40
   0   8  -1   38.80    7.50
   0   8   1   55.09    6.00
   0   8   1   52.39    7.90
   0   8  -1   39.50    5.80
  -2  -8  -1  117.59   10.50
  -2  -8  -1  135.89   12.10
   2  -8   1  132.19   13.20
   2  -8   1  125.49   10.50
  -2   8  -1  121.69   12.60
   2   8   1  137.89   11.90
  -2   8  -1  115.99   10.40
   2   8   1  125.19   10.80
  -4  -8  -1   67.49    7.40
  -4  -8  -1   75.89    8.60
   4  -8   1   63.39    7.10
   4  -8   1   53.99   10.10
   4   8   1   91.59    8.80
   4   8   1   86.69    8.20
  -4   8  -1   81.19   10.10
  -4   8  -1   72.19    7.40
  -6  -8  -1   46.10    6.20
  -6  -8  -1   47.40    7.00
   6  -8   1   51.39    9.50
   6  -8   1   44.30    5.50
  -6   8  -1   37.70    5.60
  -6   8  -1   45.30    8.70
   6   8   1   36.90    6.00
   6   8   1   37.80    6.70
   8  -8   1   70.29    7.10
  -8  -8  -1   75.69    7.90
   8  -8   1   79.49   10.70
  -8  -8  -1   74.59    8.40
  -8   8  -1   71.49    7.60
   8   8   1   72.79    8.10
   8   8   1   69.39    8.10
  -8   8  -1   73.49   10.50
 -10  -8  -1   95.49   10.90
 -10  -8  -1  112.39   10.60
 -10  -8  -1  103.19    7.30
  10   8   1  118.49   10.80
  10   8   1  114.49   10.60
 -12  -8  -1  142.79   10.90
  12  -8   1  172.28   13.30
 -12  -8  -1  163.68   13.40
  12  -8   1  175.98   11.00
  12  -8   1  194.38   16.80
 -12  -8  -1  151.48   14.60
 -12  -8  -1  153.38   13.90
  12  -8   1  165.18   14.50
  12   8   1  155.98   14.10
 -12   8  -1  179.28   16.70
 -12   8  -1  163.48   11.00
 -14  -8  -1  158.18   14.30
  14  -8   1  153.28   12.20
 -14  -8  -1  149.88   13.30
 -14  -8  -1  154.58    9.60
  14  -8   1  124.79   12.80
 -14  -8  -1  165.88   12.70
  14  -8   1  155.88   15.70
  14  -8   1  146.79    9.60
 -14   8  -1  101.09   14.80
  14   8   1  128.49   13.10
 -14   8  -1  120.59    9.70
 -16  -8  -1  412.26   29.40
  16  -8   1  474.45   29.40
  16  -8   1  448.96   35.10
 -16  -8  -1  441.36   33.40
  16  -8   1  471.25   32.10
 -16  -8  -1  443.56   32.80
  16  -8   1  402.56   32.00
 -16  -8  -1  447.46   32.20
 -16   8  -1  447.26   29.50
  16   8   1  430.56   32.90
 -16   8  -1  461.95   35.10
 -18  -8  -1  348.97   25.60
  18  -8   1  358.76   22.20
  18  -8   1  308.37   25.00
 -18  -8  -1  311.17   25.70
 -18  -8  -1  354.96   26.70
  18  -8   1  333.87   28.20
 -18  -8  -1  308.97   22.20
 -18   8  -1  337.77   22.30
 -18   8  -1  342.87   28.50
  18   8   1  337.17   26.10
  20  -8   1  230.88   20.30
  20  -8   1  223.98   13.40
 -20  -8  -1  202.48   18.40
  20  -8   1  214.28   16.80
 -20  -8  -1  193.28   13.30
 -20  -8  -1  206.18   17.20
 -20  -8  -1  184.28   17.50
 -20   8  -1  215.98   18.20
 -20   8  -1  194.88   13.40
  20   8   1  169.78   13.30
  20   8   1  191.78   17.50
 -20   8  -1  218.58   20.60
  20   8   1  189.28   13.40
 -22  -8  -1   48.30    8.60
 -22  -8  -1   37.20    8.70
  22  -8   1   42.10    3.50
  22  -8   1   45.40    7.40
 -22  -8  -1   43.60    3.50
 -22  -8  -1   38.30    8.50
  22  -8   1   39.50   10.20
  22   8   1   41.30    3.60
 -22   8  -1   52.39    9.30
  22   8   1   48.10    3.50
 -22   8  -1   39.70   10.30
  22   8   1   43.50    8.40
 -22   8  -1   41.70    3.70
 -24  -8  -1   28.80    7.10
 -24  -8  -1   19.10    7.10
  24  -8   1   27.10    8.90
 -24  -8  -1   25.20    2.60
  24  -8   1   25.40    2.50
 -24  -8  -1   17.10    7.10
  24  -8   1   25.60    6.00
  24   8   1   20.80    6.90
  24   8   1   28.80    2.70
 -24   8  -1   24.80    2.90
  24   8   1   21.50    2.60
 -24   8  -1   19.30    7.10
 -24   8  -1   20.80    8.90
 -26  -8  -1    9.70    6.60
  26  -8   1    5.70    4.80
 -26  -8  -1   12.70    2.00
 -26  -8  -1    8.90    6.10
 -26  -8  -1   11.80    7.40
  26  -8   1    6.00    6.50
 -26   8  -1    8.60    7.00
  26   8   1   15.00    2.20
 -26   8  -1   10.60    2.20
  26   8   1   14.50    6.40
 -26   8  -1    4.30    7.70
  26   8   1   14.30    2.10
 -28  -8  -1   11.20    6.50
 -28  -8  -1   13.30    7.40
 -28  -8  -1   15.20    7.90
  28  -8   1   23.50    6.20
 -28  -8  -1   18.10    2.40
  28   8   1   15.80    2.30
  28   8   1   13.30    7.60
  28   8   1   14.80    2.30
 -28   8  -1   23.60    2.80
 -28   8  -1   20.60    8.00
 -30  -8  -1   30.00    3.20
 -30  -8  -1   29.50    9.40
  30  -8   1   35.40    3.20
 -30  -8  -1   29.70    8.80
  30  -8   1   28.00    7.30
  30   8   1   31.90    3.40
  30   8   1   37.00    3.30
 -30   8  -1   32.70    3.40
 -32  -8  -1   30.60    9.20
 -32  -8  -1   21.00    3.00
  32  -8   1   24.70    3.00
  32   8   1   25.30    3.00
  32   8   1   25.10    3.10
 -32   8  -1   32.70    3.20
 -34  -8  -1   10.30    2.30
 -34  -8  -1    1.10    7.10
  34  -8   1    9.40    2.30
 -34   8  -1    9.40    2.50
  34   8   1   12.60    2.30
  34   8   1   11.00    2.50
  36  -8   1   16.70    2.60
 -36  -8  -1   15.40    2.70
 -36  -8  -1    9.30    7.60
 -36   8  -1   16.40    2.80
  36   8   1   14.50    2.50
  36   8   1   15.90    2.80
  38  -8   1   38.30    3.70
 -38  -8  -1   35.00    3.70
  38   8   1   37.80    3.80
 -38   8  -1   41.00    4.00
  38   8   1   36.10    4.10
  40  -8   1    4.00    2.30
 -40  -8  -1    1.70    2.50
 -40   8  -1    2.50    2.50
  40   8   1    2.10    2.60
 -42  -8  -1    5.00    2.60
  42  -8   1    5.70    2.30
  42   8   1    3.60    2.80
 -42   8  -1    5.10    2.80
  44  -8   1    5.80    2.30
 -44  -8  -1    4.40    2.70
 -44   8  -1    3.10    2.90
  44   8   1    3.80    2.90
 -46  -8  -1    5.00    2.80
  46  -8   1    2.50    2.40
  46   8   1    2.20    3.00
 -46   8  -1    1.20    3.10
  45  -9  -1    7.90    2.50
 -45  -9   1    8.00    2.70
 -45   9   1    7.50    3.00
  45   9  -1    7.40    2.70
 -43  -9   1    5.70    2.50
  43  -9  -1    3.60    2.50
 -43   9   1    5.90    2.70
  43   9  -1    4.20    2.50
 -41  -9   1    7.70    2.60
  41  -9  -1    7.30    2.50
  41   9  -1    5.60    2.50
 -41   9   1    7.30    2.70
 -39  -9   1   19.40    3.00
  39  -9  -1   21.40    2.90
  39   9  -1   15.90    2.80
 -39   9   1   25.00    3.40
  37  -9  -1    6.20    2.30
 -37  -9   1   14.80    2.60
 -37   9   1   10.60    2.60
  37   9  -1    8.60    2.80
  37   9  -1    8.70    2.50
  35  -9  -1   11.10    2.30
 -35  -9   1   11.60    2.40
  35   9  -1   10.70    2.40
 -35   9   1   12.40    2.50
  35   9  -1    3.50    2.60
 -33  -9   1    6.60   10.80
 -33  -9   1    6.00    6.80
  33  -9  -1    8.50    2.30
 -33  -9   1   10.30    2.30
  33   9  -1    8.30    2.20
 -33   9   1    8.10    2.30
  33   9  -1    3.90    2.40
  31  -9  -1   28.30    2.90
 -31  -9   1   19.10    9.40
 -31  -9   1   27.30    2.80
 -31  -9   1   18.80    7.70
  31   9  -1   21.20    3.00
 -31   9   1   25.10    3.20
  31   9  -1   17.80    3.00
 -29  -9   1   46.00    9.80
 -29  -9   1   45.70   11.30
 -29  -9   1   54.89    4.00
  29  -9  -1   39.40    4.10
  29   9  -1   55.89    4.30
  29   9  -1   54.79    4.20
 -29   9   1   46.30    4.30
 -27  -9   1   26.00    7.90
 -27  -9   1   35.50    3.20
 -27  -9   1   28.70    9.70
  27  -9  -1   36.90    3.30
 -27  -9   1   32.90    8.60
  27   9  -1   30.80    8.40
 -27   9   1   45.00    3.50
  27   9  -1   36.40    3.40
  27   9  -1   32.80    3.40
 -25  -9   1   16.80    6.70
 -25  -9   1   23.60    8.80
  25  -9  -1   20.00    8.20
  25  -9  -1   16.20    2.50
 -25  -9   1   29.20    2.50
 -25  -9   1   19.80    6.90
  25   9  -1   23.90    7.60
  25   9  -1   24.70    2.60
 -25   9   1   23.30    9.50
  25   9  -1   25.20    2.80
 -25   9   1   19.70    2.80
 -23  -9   1   32.40    9.30
  23  -9  -1   44.30    3.60
 -23  -9   1   48.40    9.00
 -23  -9   1   43.40    3.50
  23  -9  -1   45.60   10.30
 -23  -9   1   41.30    8.50
  23   9  -1   48.70    9.20
  23   9  -1   42.20    3.70
 -23   9   1   42.70    3.80
 -23   9   1   39.40   10.70
  21  -9  -1  115.19   14.30
  21  -9  -1  119.09    8.10
 -21  -9   1  120.99   12.60
 -21  -9   1  121.09   14.80
 -21  -9   1  116.19    8.00
 -21  -9   1  107.59   12.60
  21   9  -1  123.39    8.20
 -21   9   1  115.09    8.20
  21   9  -1  121.99   13.30
 -21   9   1  102.19   15.10
 -19  -9   1   25.60    8.10
  19  -9  -1   24.90    2.60
  19  -9  -1   22.40    8.10
 -19  -9   1   32.10    2.40
 -19  -9   1   26.80    6.50
 -19  -9   1   28.30    6.60
 -19   9   1   18.60    2.80
  19   9  -1   25.10    2.70
  19   9  -1   32.20    7.60
 -19   9   1   16.80    8.60
  17  -9  -1   58.59    3.80
 -17  -9   1   50.99    8.00
 -17  -9   1   42.00    7.90
 -17  -9   1   46.20    9.90
 -17  -9   1   50.39    3.60
  17  -9  -1   56.49   10.50
  17   9  -1   45.10    3.80
 -17   9   1   48.80   10.80
 -17   9   1   38.10    4.00
  17   9  -1   45.20    8.80
 -15  -9   1  217.28   19.60
 -15  -9   1  183.38   13.60
 -15  -9   1  194.48   17.30
  15  -9  -1  207.68   19.50
 -15  -9   1  210.28   17.60
  15  -9  -1  232.58   13.70
  15   9  -1  192.28   13.70
 -15   9   1  209.78   19.70
  15   9  -1  207.68   17.70
 -15   9   1  200.28   13.80
 -13  -9   1  299.77   24.60
 -13  -9   1  297.17   26.60
  13  -9  -1  392.16   27.50
  13   9  -1  283.67   24.60
  13   9  -1  287.17   25.50
 -13   9   1  394.76   27.60
  13   9  -1  285.57   21.40
 -13   9   1  366.16   21.50
 -11  -9   1  149.99   10.60
 -11  -9   1  162.48   15.90
  11  -9  -1  192.08   16.50
 -11  -9   1  154.08   14.10
  11  -9  -1  166.38   10.60
 -11   9   1  168.68   10.80
  11   9  -1  158.68   15.20
  11   9  -1  135.89   10.60
 -11   9   1  173.38   16.70
  11   9  -1  157.18   14.00
  -9  -9   1   90.09   10.60
  -9  -9   1   81.69    8.90
   9  -9  -1   73.49   10.80
   9  -9  -1   73.99    5.50
   9  -9  -1   78.39    7.00
  -9  -9   1   79.39    5.50
  -9   9   1   74.99   11.30
   9   9  -1   84.49    5.70
   9   9  -1   80.29    9.90
  -9   9   1   86.79    7.20
  -9   9   1   70.89    5.60
   9   9  -1   89.19    9.10
   7  -9  -1  183.58   14.20
   7  -9  -1  192.48   17.50
  -7  -9   1  180.28   15.70
  -7  -9   1  196.58   17.50
   7   9  -1  196.68   15.80
  -7   9   1  188.88   13.00
  -7   9   1  199.08   14.30
   7   9  -1  208.88   17.30
  -7   9   1  195.08   17.50
   5  -9  -1   56.69    5.80
   5  -9  -1   56.19    9.00
  -5  -9   1   64.99    9.00
  -5   9   1   36.20    5.10
  -5   9   1   35.60    8.00
   5   9  -1   45.50    7.90
   5   9  -1   45.30    6.60
  -3  -9   1  106.79   10.00
  -3  -9   1   99.29   11.50
   3   9  -1   77.29    9.20
  -3   9   1  117.89    8.80
  -3   9   1  123.99   11.90
   3   9  -1   77.69   11.00
  -1  -9   1  118.69   13.50
   1  -9  -1  165.08   14.00
   1  -9  -1  169.68   11.70
  -1  -9   1  126.39   11.80
   1   9  -1  120.49   11.60
   1   9  -1  116.19   13.60
  -1   9   1  161.38   13.80
  -1   9   1  149.29   11.60
  -1  -9  -1  173.18   15.30
   1  -9   1  185.18   15.50
   1  -9   1  210.78   18.10
  -1  -9  -1  205.38   17.30
  -1   9  -1  221.28   17.90
   1   9   1  208.28   15.80
  -1   9  -1  213.98   15.60
   1   9   1  193.18   16.70
   3  -9   1   24.00    4.80
  -3  -9  -1   16.60    5.80
   3  -9   1   19.90    7.10
  -3  -9  -1   19.50    4.50
   3   9   1   16.50    4.70
  -3   9  -1   19.30    4.30
   3   9   1   13.00    5.20
  -3   9  -1   20.90    7.10
   5  -9   1   22.60    7.20
  -5  -9  -1   21.90    6.10
  -5  -9  -1   30.10    5.60
   5  -9   1   22.60    4.60
   5   9   1   31.80    6.20
  -5   9  -1   28.10    5.40
  -5   9  -1   22.00    7.20
   5   9   1   31.60    6.20
   7  -9   1  100.09   12.30
   7  -9   1  102.99    8.50
  -7   9  -1   88.09    8.60
   7   9   1   60.89    9.10
  -7   9  -1   96.89   12.30
  -7   9  -1   87.19    6.20
   9  -9   1   47.10    6.40
   9  -9   1   58.19   10.40
  -9  -9  -1   58.09    4.10
  -9  -9  -1   57.99    8.20
  -9  -9  -1   60.49    7.50
  -9   9  -1   62.69   10.70
  -9   9  -1   57.99    4.50
   9   9   1   63.29    8.00
   9   9   1   68.69    8.20
  -9   9  -1   66.79    7.20
  11  -9   1  169.08   16.50
 -11  -9  -1  133.09   13.40
  11  -9   1  165.58   10.40
  11  -9   1  152.28   12.60
  11  -9   1  164.08   13.90
 -11  -9  -1  139.19   10.40
 -11  -9  -1  130.09   14.20
 -11   9  -1  204.18   17.60
  11   9   1  153.38   14.20
  11   9   1  167.78   13.80
  13  -9   1  343.47   26.90
 -13  -9  -1  391.76   27.20
  13  -9   1  382.16   29.50
  13  -9   1  341.47   25.80
 -13  -9  -1  342.77   23.70
  13  -9   1  367.26   23.80
 -13  -9  -1  360.96   26.60
 -13  -9  -1  354.46   28.00
  13   9   1  381.06   27.20
 -13   9  -1  357.86   29.50
 -13   9  -1  336.07   23.80
 -15  -9  -1  214.08   13.90
 -15  -9  -1  219.88   17.30
 -15  -9  -1  238.28   18.90
  15  -9   1  209.78   14.00
  15  -9   1  199.38   20.10
 -15  -9  -1  201.48   17.60
  15  -9   1  177.08   16.30
 -15   9  -1  204.68   14.10
 -15   9  -1  199.08   19.90
  15   9   1  225.98   17.90
 -17  -9  -1   16.40    6.30
 -17  -9  -1   23.50    6.60
  17  -9   1   16.70    5.00
  17  -9   1   17.20    7.70
  17  -9   1    4.20    5.70
 -17  -9  -1   23.00    2.00
  17  -9   1   14.00    2.20
 -17  -9  -1   24.00    5.20
 -17   9  -1   14.70    8.30
 -17   9  -1   18.00    2.50
  17   9   1   23.00    6.50
  17   9   1   19.70    2.20
  19  -9   1  134.49   15.60
  19  -9   1  133.89    8.80
 -19  -9  -1  129.99   12.50
  19  -9   1  121.09   12.50
 -19  -9  -1  123.59   13.20
  19  -9   1  137.89   12.10
 -19  -9  -1  125.89    8.80
 -19  -9  -1  136.19   14.20
 -19   9  -1  125.39    9.00
  19   9   1  126.19    8.80
  19   9   1  125.29   13.20
  19   9   1  130.79    8.80
 -19   9  -1  127.39   16.00
 -21  -9  -1  153.68   15.70
 -21  -9  -1  156.58   11.30
  21  -9   1  188.98   18.60
  21  -9   1  187.78   15.20
  21  -9   1  186.28   11.40
  21  -9   1  188.98   15.00
 -21  -9  -1  163.78   15.40
 -21  -9  -1  165.58   17.00
 -21   9  -1  179.68   11.50
  21   9   1  146.69   15.50
  21   9   1  162.68   11.40
 -21   9  -1  182.58   19.20
  21   9   1  147.69   11.30
 -23  -9  -1   34.50    8.80
  23  -9   1   30.90    6.60
 -23  -9  -1   44.10    8.00
  23  -9   1   30.90    3.10
  23  -9   1   30.50    9.60
 -23  -9  -1   35.30    3.10
 -23  -9  -1   39.30    8.40
 -23   9  -1   34.30    3.40
  23   9   1   38.80    3.20
  23   9   1   43.20    3.20
  23   9   1   40.50    8.30
 -23   9  -1   21.20    9.50
  25  -9   1   43.50    7.60
 -25  -9  -1   27.80    3.00
  25  -9   1   41.70   10.90
  25  -9   1   35.20    3.10
 -25  -9  -1   23.60    8.30
 -25  -9  -1   37.30    8.10
 -25  -9  -1   14.10    7.20
 -25   9  -1   25.20   10.00
  25   9   1   28.80    7.80
  25   9   1   32.00    3.10
 -25   9  -1   39.80    9.10
 -25   9  -1   43.10    3.30
  25   9   1   31.20    3.10
 -27  -9  -1   31.30    9.70
  27  -9   1   34.60    6.90
 -27  -9  -1   40.20    9.20
 -27  -9  -1   32.70    9.60
  27  -9   1   41.40    3.50
 -27  -9  -1   38.00    3.40
 -27   9  -1   46.50    3.80
  27   9   1   42.20    3.60
  27   9   1   38.60    3.50
 -27   9  -1   57.49   10.80
 -29  -9  -1   23.40    8.20
  29  -9   1   31.80   10.20
 -29  -9  -1   22.40    2.80
  29  -9   1   30.70    2.90
 -29  -9  -1   14.60    8.50
  29   9   1   18.50    3.00
 -29   9  -1   36.20    3.30
  29   9   1   25.00    3.00
  31  -9   1   17.60    2.60
 -31  -9  -1    8.20    6.90
 -31  -9  -1   15.50    2.70
 -31  -9  -1    3.90    7.90
  31   9   1   15.70    2.50
 -31   9  -1   20.50    2.80
  31   9   1   16.00    2.50
  33  -9   1    8.90    2.20
 -33  -9  -1    2.00    8.00
 -33  -9  -1   11.10    7.30
 -33  -9  -1    6.40    2.30
  33   9   1    6.30    2.20
 -33   9  -1   11.80    2.50
  33   9   1    5.80    2.30
 -35  -9  -1   30.20    3.30
 -35  -9  -1   10.30    8.10
 -35  -9  -1   19.20   10.10
  35  -9   1   33.80    3.20
  35   9   1   33.00    3.40
  35   9   1   24.90    3.50
 -35   9  -1   33.10    3.60
 -37  -9  -1   16.40    2.90
  37  -9   1   13.80    2.60
 -37   9  -1   12.20    2.90
  37   9   1   12.70    2.90
  37   9   1   12.40    2.60
  39  -9   1   12.20    2.40
 -39  -9  -1   16.40    2.90
 -39   9  -1   10.00    2.80
  39   9   1   10.70    2.90
 -41  -9  -1    6.00    2.60
  41  -9   1    4.40    2.10
  41   9   1    3.20    2.80
 -41   9  -1    2.10    2.80
 -43  -9  -1    1.20    2.60
  43  -9   1    3.70    2.40
 -43   9  -1    3.10    2.80
  43   9   1   -1.00    2.90
  45  -9   1    3.20    2.50
 -45  -9  -1    0.30    2.90
  45   9   1    1.70    2.90
 -45   9  -1    1.90    3.10
  44 -10  -1    3.60    2.50
 -44 -10   1    3.70    2.50
 -44  10   1    0.10    2.80
  44  10  -1    2.50    2.60
  42 -10  -1    0.90    2.40
 -42 -10   1    5.10    2.60
  42  10  -1    1.60    2.50
 -42  10   1    2.70    2.70
  40 -10  -1    6.70    2.40
 -40 -10   1    7.90    2.60
  40  10  -1    1.70    2.50
 -40  10   1    4.90    2.60
  38 -10  -1   19.40    2.90
 -38 -10   1   21.80    2.80
  38  10  -1    9.90    2.70
 -38  10   1   21.50    3.30
  36 -10  -1   16.20    2.80
 -36 -10   1   20.20    2.80
 -36  10   1   12.60    2.90
  36  10  -1   14.60    2.70
  34 -10  -1   10.20    2.50
 -34 -10   1   15.40    2.70
  34  10  -1   14.10    2.50
 -34  10   1   13.60    2.80
  32 -10  -1   19.90    2.90
 -32 -10   1   22.20    8.40
 -32 -10   1   18.10   10.10
  32  10  -1   30.60    3.10
  32  10  -1   21.30    3.40
 -32  10   1   20.20    3.30
 -30 -10   1   18.30    7.80
 -30 -10   1   28.10    2.80
 -30 -10   1   21.70    9.80
  30 -10  -1   23.00    2.90
 -30  10   1   20.80    3.20
  30  10  -1   20.70    3.10
  30  10  -1   23.50    3.00
 -28 -10   1   88.49    6.20
 -28 -10   1   84.89   14.00
 -28 -10   1   92.99   12.80
  28 -10  -1   84.99    6.30
  28  10  -1   90.99    6.30
  28  10  -1   82.89    6.30
 -28  10   1   81.09    6.40
 -26 -10   1   62.39    9.90
 -26 -10   1   66.89   12.60
 -26 -10   1   32.10    9.00
 -26 -10   1   63.39    4.50
  26 -10  -1   60.99    4.60
  26  10  -1   54.29    4.50
  26  10  -1   64.59    4.60
 -26  10   1   51.99    4.70
 -24 -10   1    9.70    6.00
  24 -10  -1   11.60    2.10
 -24 -10   1    9.90    7.20
  24 -10  -1   14.40    7.50
 -24 -10   1   16.90    2.10
 -24 -10   1   10.80    5.60
 -24  10   1   13.70    2.40
  24  10  -1   14.90    2.20
  24  10  -1   11.90    7.20
 -24  10   1   11.10    8.90
  24  10  -1   16.60    2.20
 -22 -10   1   42.70    8.70
  22 -10  -1   47.20   10.70
 -22 -10   1   48.90    4.00
 -22 -10   1   63.19    9.30
 -22 -10   1   49.80   10.90
  22 -10  -1   58.19    4.20
  22  10  -1   52.89   10.30
 -22  10   1   53.89    4.40
  22  10  -1   53.69    4.30
 -22  10   1   52.19   12.10
  20 -10  -1   77.49    5.40
  20 -10  -1   76.69   12.80
 -20 -10   1   78.09    5.30
 -20 -10   1   59.09    9.50
 -20 -10   1   60.09   10.00
 -20 -10   1   65.39   12.10
  20  10  -1   74.99   10.70
 -20  10   1   79.29    5.60
  20  10  -1   72.09    5.50
 -20  10   1   82.19   13.50
 -18 -10   1   67.59   11.60
  18 -10  -1   63.49    4.70
 -18 -10   1   65.19    4.60
 -18 -10   1   59.09    9.00
  18 -10  -1   57.19   11.80
 -18 -10   1   72.29    9.20
 -18  10   1   57.69   11.70
  18  10  -1   76.09   10.00
  18  10  -1   66.29    4.80
 -18  10   1   57.09    4.90
  16 -10  -1   94.99   13.20
 -16 -10   1  101.89   11.20
 -16 -10   1   97.69    6.90
 -16 -10   1   84.69   10.80
  16 -10  -1  101.09    6.90
 -16 -10   1   91.89   13.50
  16  10  -1  118.79   11.90
 -16  10   1   97.69    7.10
 -16  10   1  106.49   14.20
  16  10  -1  104.79    7.00
 -14 -10   1   29.50    2.30
 -14 -10   1   20.70    7.40
  14 -10  -1   20.50    8.10
  14 -10  -1   19.10    2.40
 -14 -10   1   27.30    6.20
  14  10  -1   27.70    7.40
 -14  10   1   24.70    8.60
  14  10  -1   30.40    2.50
  14  10  -1   36.00    7.40
 -14  10   1   17.00    2.80
 -12 -10   1  285.17   23.70
  12 -10  -1  336.57   26.30
  12 -10  -1  351.16   20.50
 -12 -10   1  284.97   20.50
 -12 -10   1  287.27   26.10
 -12  10   1  355.96   26.60
 -12  10   1  345.97   20.60
  12  10  -1  282.17   20.50
  12  10  -1  256.67   24.80
  12  10  -1  277.87   23.70
  10 -10  -1  260.07   20.80
 -10 -10   1  183.38   19.10
 -10 -10   1  195.98   14.30
 -10 -10   1  194.88   17.60
 -10  10   1  248.18   14.40
  10  10  -1  205.18   17.70
 -10  10   1  250.47   20.40
  10  10  -1  173.38   18.50
   8 -10  -1   86.79    7.90
  -8 -10   1   82.89   11.40
  -8 -10   1   95.49    9.80
  -8 -10   1   86.79    6.10
   8 -10  -1   94.49   12.00
   8 -10  -1   81.89    6.10
   8  10  -1   83.19    6.20
  -8  10   1   98.19   12.30
   8  10  -1   96.59   10.00
  -8  10   1  105.29    8.30
  -8  10   1   94.09    6.30
   8  10  -1   81.99   10.90
  -6 -10   1   64.99    5.10
  -6 -10   1   62.39   10.20
  -6 -10   1   63.39    8.60
   6 -10  -1   89.19   11.10
   6 -10  -1   85.19    7.40
  -6  10   1   80.39    5.30
  -6  10   1   98.49   11.60
   6  10  -1   67.89    8.40
  -6  10   1   89.39    7.40
   6  10  -1   63.09    5.20
   6  10  -1   70.79   10.00
   4 -10  -1  180.68   13.60
   4 -10  -1  187.98   16.40
  -4 -10   1  173.88   14.60
  -4 -10   1  184.98   16.40
   4  10  -1  168.88   14.30
  -4  10   1  158.98   11.60
   4  10  -1  163.28   11.50
   4  10  -1  185.58   16.10
  -4  10   1  167.98   13.30
  -4  10   1  164.58   16.10
  -2 -10   1   69.29    9.80
   2 -10  -1   64.89    7.30
  -2 -10   1   74.89    8.30
   2 -10  -1   67.49    9.90
   2  10  -1   80.29    8.00
  -2  10   1   60.49    4.90
   2  10  -1   66.79    4.80
   2  10  -1   81.39    9.90
  -2  10   1   60.69    7.00
  -2  10   1   53.69    9.50
   0 -10  -1   75.59    9.70
   0 -10  -1   68.29    7.10
   0 -10   1   61.59   10.10
   0 -10   1   60.79    7.50
   0  10  -1   62.99    4.80
   0  10   1   81.99    9.50
   0  10   1   71.59    7.40
   0  10  -1   57.09    7.60
   0  10  -1   69.09    9.90
   2 -10   1  283.87   23.50
   2 -10   1  263.07   20.90
  -2 -10  -1  305.17   21.30
  -2 -10  -1  306.67   22.70
   2  10   1  292.27   21.40
  -2  10  -1  273.77   21.00
   2  10   1  307.67   22.70
  -2  10  -1  255.97   18.80
  -2  10  -1  278.07   23.30
  -4 -10  -1   52.09    9.10
   4 -10   1   80.89    8.10
   4 -10   1   91.09   11.90
   4  10   1   60.59    8.20
  -4  10  -1   84.69    5.50
  -4  10  -1   85.99   11.40
  -4  10  -1   89.79    8.20
   4  10   1   54.39    8.90
  -6 -10  -1  103.59   10.00
  -6 -10  -1   93.89    7.10
  -6 -10  -1   93.79   10.80
   6 -10   1  104.49    9.50
   6 -10   1   97.09   13.00
  -6  10  -1  106.69    9.70
  -6  10  -1  104.59   12.80
  -6  10  -1  107.89    7.20
   6  10   1  100.89   11.30
   6  10   1  106.39   10.50
   8 -10   1  168.88   12.40
   8 -10   1  176.68   16.60
  -8 -10  -1  137.19   12.90
  -8 -10  -1  146.79   10.00
  -8 -10  -1  138.79   13.60
  -8  10  -1  159.18   16.30
  -8  10  -1  149.59   12.70
  -8  10  -1  151.48   10.10
   8  10   1  134.49   13.70
   8  10   1  130.29   13.50
  10 -10   1 1253.37   85.69
 -10 -10  -1 1355.76   86.59
  10 -10   1 1261.17   83.79
  10 -10   1 1255.27   88.69
 -10 -10  -1 1316.07   87.29
  10  10   1 1266.07   86.79
  10  10   1 1269.67   86.99
 -10  10  -1 1234.68   88.59
 -10  10  -1 1207.78   83.79
 -12 -10  -1  550.64   37.40
  12 -10   1  469.65   38.80
  12 -10   1  458.95   35.10
  12 -10   1  480.45   36.40
 -12 -10  -1  551.84   33.20
 -12 -10  -1  544.55   36.60
  12 -10   1  493.95   33.20
  12  10   1  523.75   36.80
 -12  10  -1  466.65   38.80
 -12  10  -1  437.06   33.30
  12  10   1  535.35   37.00
  12  10   1  507.45   33.30
 -14 -10  -1   94.89    6.40
  14 -10   1   95.69    6.40
  14 -10   1   83.29   10.60
 -14 -10  -1   90.59   10.40
 -14 -10  -1   94.29   11.70
  14 -10   1  101.89   13.30
 -14 -10  -1  102.99    9.90
  14 -10   1   77.99    8.90
  14  10   1   90.99    6.40
  14  10   1   99.29   10.90
 -14  10  -1   88.39   13.50
 -14  10  -1   88.59    6.60
 -16 -10  -1   21.80    2.30
 -16 -10  -1   28.50    5.90
  16 -10   1   28.30    6.50
  16 -10   1   36.20    5.80
 -16 -10  -1   13.70    5.70
  16 -10   1   27.90    2.50
 -16 -10  -1   21.90    7.10
  16 -10   1   35.10    9.70
 -16  10  -1   31.00    9.80
 -16  10  -1   29.60    2.80
  16  10   1   23.90    6.80
  16  10   1   17.70    2.50
 -18 -10  -1   23.10    7.10
 -18 -10  -1   28.10    6.20
  18 -10   1   25.60    8.80
  18 -10   1   20.30    5.70
 -18 -10  -1   24.20    6.80
 -18 -10  -1   29.70    2.50
  18  10   1   33.90    7.30
 -18  10  -1   13.50    8.30
  18  10   1   27.40    2.60
  20 -10   1  119.29   12.50
 -20 -10  -1  121.19   12.40
  20 -10   1  121.49   11.90
 -20 -10  -1  124.99    8.50
 -20 -10  -1  119.09   13.20
  20 -10   1  126.89    8.50
 -20 -10  -1  138.59   14.70
  20 -10   1  121.09   15.60
  20  10   1  128.49    8.60
  20  10   1  114.79    8.50
  20  10   1  123.89   13.20
 -20  10  -1  130.69   16.90
 -20  10  -1  128.99    8.70
 -22 -10  -1    5.00    6.70
  22 -10   1   15.70    8.10
 -22 -10  -1   11.40    5.50
 -22 -10  -1   12.50    2.00
 -22 -10  -1   10.50    6.40
  22 -10   1   14.60    5.80
  22 -10   1   19.80    5.40
  22 -10   1   17.10    2.20
  22  10   1    8.50    6.00
  22  10   1   10.70    1.80
 -22  10  -1   13.70    8.60
 -22  10  -1   11.90    2.40
  22  10   1    7.40    2.00
 -24 -10  -1   21.50    7.60
  24 -10   1   32.30    7.10
  24 -10   1   22.10    6.20
  24 -10   1   21.70    9.30
 -24 -10  -1   23.50    8.10
 -24 -10  -1   28.00    7.00
  24 -10   1   32.90    3.00
 -24 -10  -1   32.00    2.90
  24  10   1   23.10    7.40
 -24  10  -1   26.20    3.30
  24  10   1   26.70    2.90
 -24  10  -1   27.90   10.70
  24  10   1   34.20    2.90
  26 -10   1   15.70    5.80
 -26 -10  -1   26.40    7.60
 -26 -10  -1   21.00    8.70
  26 -10   1   20.30    6.50
  26 -10   1   18.70    2.50
 -26  10  -1   17.60    2.90
  26  10   1   22.80    2.60
 -28 -10  -1   64.49   12.40
 -28 -10  -1   66.19    4.90
  28 -10   1   57.49    5.00
 -28 -10  -1   67.09   10.90
  28  10   1   69.29    5.00
 -28  10  -1   54.39    5.20
  28  10   1   72.89    5.00
 -30 -10  -1   25.50    2.70
 -30 -10  -1   17.70    9.10
  30 -10   1   20.00    2.70
 -30 -10  -1   22.10    7.80
  30  10   1   18.60    2.90
 -30  10  -1   19.50    3.10
  30  10   1   20.00    2.90
 -32 -10  -1    6.20    7.10
 -32 -10  -1    4.90    2.30
 -32 -10  -1    5.30    8.00
  32  10   1    6.40    2.30
  32  10   1    4.90    2.20
 -34 -10  -1    8.00    7.90
  34 -10   1   18.40    2.60
 -34 -10  -1   14.60    2.60
 -34 -10  -1    9.60   13.70
 -34  10  -1   19.80    2.90
  34  10   1   14.80    2.50
  34  10   1   12.20    2.60
 -36 -10  -1   15.80    2.90
  36 -10   1   22.10    2.70
  36  10   1   17.70    3.00
  36  10   1   19.30    3.00
 -36  10  -1   17.20    3.00
  38 -10   1   36.70    3.60
 -38 -10  -1   37.40    3.70
 -38  10  -1   29.40    4.00
  38  10   1   34.80    4.10
 -40 -10  -1   10.90    2.80
  40 -10   1   13.00    2.50
 -40  10  -1   14.00    3.00
  40  10   1   14.70    3.00
 -42 -10  -1    1.60    2.50
  42 -10   1    4.90    2.40
 -42  10  -1    1.20    2.80
  42  10   1    3.20    2.80
  44 -10   1    7.40    2.50
 -44 -10  -1    6.90    2.80
 -44  10  -1    5.60    3.00
 -43 -11   1    5.00    2.70
  43 -11  -1    1.80    2.50
  43  11  -1    1.30    2.50
 -43  11   1    1.80    2.90
 -41 -11   1    4.00    2.60
  41 -11  -1    3.00    2.40
 -41  11   1    1.60    2.90
  41  11  -1    0.80    2.50
 -39 -11   1   27.60    3.10
  39 -11  -1   22.20    3.00
  39  11  -1   19.30    3.10
 -39  11   1   19.60    3.40
  37 -11  -1    7.80    2.40
 -37  11   1    7.10    2.80
  37  11  -1   11.00    2.50
 -35 -11   1   32.00    3.30
  35 -11  -1   26.00    3.30
 -35  11   1   30.60    3.80
  35  11  -1   36.70    3.50
 -33 -11   1   24.40    2.80
  33 -11  -1   16.80    2.80
  33  11  -1   19.00    3.10
 -33  11   1   20.30    3.10
 -31 -11   1   60.79    4.60
 -31 -11   1   41.10   11.60
  31 -11  -1   53.49    4.70
 -31 -11   1   40.70   10.30
  31  11  -1   63.59    4.80
 -31  11   1   57.89    5.00
 -29 -11   1   31.90    3.10
 -29 -11   1   35.20    9.00
  29 -11  -1   30.60    3.20
 -29 -11   1   31.10   10.30
  29  11  -1   29.00    3.30
 -29  11   1   31.30    3.60
 -27 -11   1   17.20    9.10
 -27 -11   1    9.20    6.00
  27 -11  -1   22.20    2.80
 -27 -11   1   26.30    2.70
  27  11  -1   21.90    2.90
 -27  11   1   27.20    3.20
 -25 -11   1    9.80    5.60
 -25 -11   1    6.30    8.10
  25  11  -1    9.40    2.20
  25  11  -1   11.90    2.00
 -23 -11   1   17.90    7.10
  23 -11  -1   26.80    2.80
 -23 -11   1   17.90    6.20
 -23 -11   1   17.00    8.60
  23 -11  -1   23.70    8.90
 -23 -11   1   25.00    2.50
 -23  11   1   29.20   10.00
  23  11  -1   20.50    7.20
 -23  11   1   26.60    3.00
  23  11  -1   22.40    2.90
 -21 -11   1   32.80    9.80
  21 -11  -1   68.49   13.00
 -21 -11   1   31.70    7.80
 -21 -11   1   30.10    7.40
  21 -11  -1   48.60    3.50
 -21 -11   1   38.20    3.30
 -21  11   1   40.40    3.70
  21  11  -1   31.10    8.20
  21  11  -1   35.40    3.50
 -21  11   1   35.90   10.70
 -19 -11   1   61.49    8.90
  19 -11  -1   52.29   11.40
  19 -11  -1   42.60    3.80
 -19 -11   1   61.69    8.90
 -19 -11   1   43.30   10.00
  19  11  -1   60.69    9.60
  19  11  -1   54.29    3.90
 -19  11   1   30.20   10.30
 -19  11   1   39.10    4.00
 -17 -11   1   60.99    9.00
 -17 -11   1   64.89    4.60
 -17 -11   1   63.79    9.00
 -17 -11   1   64.69   11.90
  17 -11  -1   71.49    4.70
  17 -11  -1   60.59   11.60
  17  11  -1   59.99    9.50
  17  11  -1   59.99    4.80
 -17  11   1   60.39    5.00
 -17  11   1   53.29   11.90
  15 -11  -1   66.99    5.40
 -15 -11   1   78.69   12.20
  15 -11  -1   58.89   12.00
 -15 -11   1   83.79    5.30
 -15 -11   1   77.99    9.80
 -15  11   1   63.59    5.60
  15  11  -1   84.39   10.10
  15  11  -1   82.69    5.40
 -15  11   1   77.99   12.80
 -13 -11   1  267.77   21.60
 -13 -11   1  262.87   18.10
  13 -11  -1  288.67   24.20
 -13 -11   1  288.17   24.10
  13 -11  -1  292.47   18.20
  13  11  -1  271.97   22.20
 -13  11   1  270.97   18.30
 -13  11   1  276.57   24.50
  13  11  -1  238.98   22.60
  13  11  -1  265.67   18.20
  11 -11  -1    2.60    6.10
 -11 -11   1    0.70    4.20
  11 -11  -1    3.10    3.10
 -11 -11   1   -0.10    5.40
 -11 -11   1    6.00    1.40
 -11  11   1    3.70    1.90
  11  11  -1   -0.50    4.70
 -11  11   1   10.90    7.30
  11  11  -1    3.20    5.00
 -11  11   1    2.20    2.90
  11  11  -1    4.30    1.70
   9 -11  -1  341.97   26.30
   9 -11  -1  316.57   22.10
   9 -11  -1  324.77   20.40
  -9 -11   1  294.47   20.40
  -9 -11   1  272.07   23.70
  -9 -11   1  285.87   25.60
   9  11  -1  267.67   20.40
  -9  11   1  329.37   20.50
   9  11  -1  291.57   23.80
  -9  11   1  329.17   22.30
  -9  11   1  349.17   26.50
   9  11  -1  296.37   25.30
  -7 -11   1  112.99   12.00
   7 -11  -1  121.39    8.60
   7 -11  -1  135.39   11.00
   7 -11  -1  130.79   14.90
  -7 -11   1  123.89    8.60
  -7 -11   1   80.79   13.30
  -7  11   1  116.29   14.50
  -7  11   1  144.49    8.90
   7  11  -1  118.99   12.30
  -7  11   1  149.59   10.90
  -5 -11   1  256.57   22.80
  -5 -11   1  266.47   21.40
   5 -11  -1  337.07   23.90
  -5 -11   1  261.97   18.10
   5 -11  -1  313.57   20.60
  -5  11   1  279.07   18.20
   5  11  -1  235.88   18.10
   5  11  -1  252.27   21.10
  -5  11   1  282.47   23.20
  -5  11   1  289.07   20.10
   5  11  -1  249.38   22.70
  -3 -11   1  145.49   14.20
  -3 -11   1  121.19   12.00
  -3 -11   1  129.39    8.70
   3 -11  -1  154.78   11.50
   3 -11  -1  159.18   14.90
  -3  11   1  130.39    8.90
  -3  11   1  126.19   11.10
   3  11  -1  113.99    8.80
  -3  11   1  126.19   14.20
   3  11  -1  128.49   12.00
   3  11  -1  119.99   13.70
   1 -11  -1  159.58   15.90
   1 -11  -1  145.59   13.40
  -1 -11   1  151.98   14.10
  -1 -11   1  163.88   16.10
  -1  11   1  177.48   16.20
   1  11  -1  184.88   14.20
   1  11  -1  182.88   16.70
  -1  11   1  159.08   11.20
   1  11  -1  164.58   11.20
  -1  11   1  175.88   13.70
   1 -11   1   55.89    7.30
  -1 -11  -1   41.20    6.80
   1 -11   1   54.29    9.90
  -1 -11  -1   55.99    9.70
   1  11   1   47.40    6.80
  -1  11  -1   51.99    9.80
   1  11   1   47.50    8.50
  -1  11  -1   47.00    3.80
   1  11   1   44.20    3.80
  -1  11  -1   53.29    7.10
   3 -11   1  212.98   17.60
  -3 -11  -1  181.88   17.60
  -3 -11  -1  215.18   19.30
   3 -11   1  223.28   20.90
   3  11   1  238.78   18.30
  -3  11  -1  259.97   21.00
  -3  11  -1  235.88   15.40
   3  11   1  257.27   19.80
   3  11   1  232.98   15.40
  -3  11  -1  243.58   18.10
  -5 -11  -1  143.79   15.00
  -5 -11  -1  168.38   13.90
   5 -11   1  152.18   13.40
  -5 -11  -1  144.49   10.80
   5 -11   1  148.79   16.50
  -5  11  -1  168.48   16.60
   5  11   1  162.18   10.90
  -5  11  -1  161.58   11.00
  -5  11  -1  173.68   13.70
   5  11   1  181.18   14.30
   5  11   1  188.38   15.70
   7 -11   1  369.46   26.80
   7 -11   1  396.06   30.40
  -7 -11  -1  371.16   24.60
  -7 -11  -1  375.06   28.40
  -7 -11  -1  375.76   27.60
  -7  11  -1  353.56   30.00
  -7  11  -1  351.36   24.70
   7  11   1  377.96   28.10
  -7  11  -1  374.76   27.20
   7  11   1  364.76   24.60
   7  11   1  379.06   28.60
   9 -11   1  503.75   40.60
  -9 -11  -1  546.05   39.30
   9 -11   1  499.95   35.40
  -9 -11  -1  551.84   35.40
   9 -11   1  471.95   37.40
  -9  11  -1  545.75   41.20
   9  11   1  587.94   39.10
   9  11   1  599.04   39.60
  -9  11  -1  517.75   35.50
   9  11   1  559.14   35.50
  -9  11  -1  517.55   38.00
  11 -11   1   24.30    8.30
 -11 -11  -1   28.30    7.10
 -11 -11  -1   27.00    6.60
  11 -11   1   33.00    5.60
  11 -11   1   27.00    2.50
 -11 -11  -1   30.40    2.40
 -11  11  -1   27.20    2.90
  11  11   1   25.80    2.60
 -11  11  -1   29.70    9.40
  11  11   1   34.90    7.60
  11  11   1   28.50    6.90
  13 -11   1   86.79   10.40
 -13 -11  -1   78.49   10.70
  13 -11   1   78.19   12.70
  13 -11   1   77.39    5.90
  13 -11   1   76.19    8.40
 -13 -11  -1   84.09    5.80
 -13 -11  -1   84.59   10.10
  13  11   1   90.69    5.90
  13  11   1  102.19   11.00
 -13  11  -1   78.19    6.10
 -13  11  -1   85.99   13.60
  13  11   1   98.29   10.90
  15 -11   1  139.99    9.60
  15 -11   1  153.68   13.80
 -15 -11  -1  121.49   13.50
 -15 -11  -1  132.19    9.60
  15 -11   1  144.69   12.20
 -15 -11  -1  151.08   14.80
 -15 -11  -1  160.58   13.30
  15 -11   1  167.68   17.50
 -15  11  -1  137.89    9.80
 -15  11  -1  141.09   16.80
  15  11   1  147.29   14.20
  15  11   1  142.79    9.70
  17 -11   1   32.70    6.10
 -17 -11  -1   39.80    8.20
 -17 -11  -1   35.40    6.80
  17 -11   1   30.90    3.00
 -17 -11  -1   34.30    2.80
  17 -11   1   33.10    9.90
  17 -11   1   26.10    7.00
 -17 -11  -1   36.40    8.70
  17  11   1   36.90    3.10
  17  11   1   48.60    8.60
 -17  11  -1   38.10   10.60
 -17  11  -1   34.20    3.30
  19 -11   1   27.10    7.00
  19 -11   1   38.50    6.50
  19 -11   1   28.70    9.30
 -19 -11  -1   23.90    2.30
 -19 -11  -1   17.40    7.70
 -19 -11  -1   18.00    6.70
 -19 -11  -1   22.40    5.80
  19  11   1   19.70    2.50
 -19  11  -1   34.40   10.00
  19  11   1   18.60    2.10
  19  11   1   18.40    7.00
 -21 -11  -1   89.79   11.10
 -21 -11  -1   93.79    7.00
  21 -11   1  110.49    7.10
  21 -11   1  104.29   10.60
  21 -11   1  116.69   15.30
 -21 -11  -1   95.69   12.20
  21 -11   1  114.59   11.50
 -21 -11  -1  107.49   13.70
  21  11   1   87.89    7.00
 -21  11  -1  108.59    7.30
  21  11   1  102.29    7.10
  21  11   1   99.49   12.60
 -21  11  -1  107.49   15.40
  23 -11   1   21.80    2.50
 -23 -11  -1   21.60    2.30
 -23 -11  -1   11.40    7.30
 -23 -11  -1   15.40    7.10
  23 -11   1   16.20    6.30
 -23 -11  -1   15.80    6.00
  23 -11   1   21.80    8.80
  23 -11   1   22.30    5.90
 -23  11  -1   21.50    2.90
 -23  11  -1   15.70    9.80
  23  11   1   17.90    2.50
  23  11   1   14.80    2.20
  23  11   1   21.90    7.40
  25 -11   1   95.49    7.00
  25 -11   1  104.29   10.90
 -25 -11  -1  102.49   12.60
  25 -11   1   71.89   10.80
 -25 -11  -1  105.79    7.00
 -25 -11  -1  120.19   15.10
  25  11   1  105.49    7.10
  25  11   1   95.19    7.00
 -25  11  -1   98.69    7.30
  27 -11   1   34.80    3.40
 -27 -11  -1   34.00    9.90
 -27 -11  -1   37.50    8.60
 -27  11  -1   32.00    3.90
  27  11   1   40.00    3.50
  27  11   1   38.20    3.50
 -29 -11  -1   34.00    9.00
 -29 -11  -1   30.30   10.10
  29 -11   1   43.50    3.70
 -29 -11  -1   48.20    3.70
 -29  11  -1   38.70    4.30
  29  11   1   38.80    3.80
  29  11   1   43.30    3.80
 -31 -11  -1    6.70    8.20
 -31 -11  -1   14.20    7.50
 -31 -11  -1   17.40    2.60
 -31  11  -1   10.00    2.90
  31  11   1   20.30    2.90
  31  11   1   18.00    2.90
 -33 -11  -1   14.90    2.70
  33 -11   1   15.30    2.70
  33  11   1   13.00    2.50
 -33  11  -1   12.10    2.90
  33  11   1   14.00    2.60
 -35 -11  -1   17.10    2.80
  35 -11   1   10.80    2.60
  35  11   1   13.50    2.40
  35  11   1   16.20    2.80
 -35  11  -1    9.50    2.90
  37 -11   1    9.90    2.50
 -37 -11  -1    7.40    2.40
 -37  11  -1    9.70    2.90
  37  11   1    4.20    2.60
  39 -11   1    5.10    2.40
 -39 -11  -1    5.40    2.50
 -39  11  -1    4.90    2.90
  39  11   1    5.50    3.80
  41 -11   1    2.80    2.50
 -41 -11  -1    1.90    2.60
 -41  11  -1    1.80    3.00
 -43 -11  -1    6.80    2.70
  43 -11   1    4.90    2.50
 -43  11  -1    6.80    3.20
 -42 -12   1    4.80    2.60
  42 -12  -1   -0.20    2.50
 -42  12   1    3.70    2.90
  42  12  -1    1.40    2.40
  40 -12  -1    6.80    2.60
 -40 -12   1    8.10    2.50
  40  12  -1    5.90    2.60
 -40  12   1    6.00    2.90
  38 -12  -1    7.20    2.60
 -38  12   1    7.00    2.90
  38  12  -1   14.00    2.70
  36 -12  -1   29.50    3.60
 -36 -12   1   36.10    3.50
 -36  12   1   33.80    4.10
  36  12  -1   42.80    3.80
  34 -12  -1    6.80    2.50
 -34 -12   1   15.20    2.70
 -34  12   1    8.70    2.80
  34  12  -1   10.00    2.50
 -32 -12   1   22.80   10.40
  32 -12  -1   28.70    3.40
 -32 -12   1   33.50    3.30
 -32  12   1   29.20    3.80
  32  12  -1   35.00    3.50
 -30 -12   1   16.20    7.60
 -30 -12   1   14.00    9.50
 -30 -12   1   22.00    2.60
  30 -12  -1   16.40    2.90
  30  12  -1   22.90    3.00
 -30  12   1   22.40    3.30
 -28 -12   1   34.70    8.70
 -28 -12   1   45.10    3.60
 -28 -12   1   28.50   10.50
  28 -12  -1   38.70    3.80
 -28  12   1   39.00    4.10
  28  12  -1   45.70    3.80
  26 -12  -1   13.70    2.40
 -26 -12   1    8.60    8.40
 -26 -12   1    7.40    5.70
 -26 -12   1   13.40    2.20
 -26  12   1   15.00    2.60
  26  12  -1    8.70    2.20
 -24 -12   1   22.60    9.10
 -24 -12   1   14.00    6.20
  24 -12  -1   29.90    3.10
 -24 -12   1   29.30    2.90
  24  12  -1   28.20    3.10
 -24  12   1   31.00    3.40
  22 -12  -1  125.49    7.80
  22 -12  -1  131.39   16.40
 -22 -12   1  105.19   15.70
 -22 -12   1  106.29   12.60
 -22 -12   1  101.59    7.70
 -22 -12   1   94.19   12.40
  22  12  -1  105.09   14.90
  22  12  -1  104.29    7.90
 -22  12   1  116.49   16.40
 -22  12   1  119.79    8.00
 -20 -12   1  116.79   12.90
 -20 -12   1  114.19    7.80
  20 -12  -1  112.09    7.90
  20 -12  -1  117.29   15.40
 -20 -12   1  119.09   12.80
 -20 -12   1  100.89   15.40
  20  12  -1  110.49   13.00
  20  12  -1  118.19    8.00
 -20  12   1  107.89   16.30
 -20  12   1  107.49    8.10
  18 -12  -1   19.10    8.60
 -18 -12   1   18.20    6.60
 -18 -12   1   23.80    2.50
 -18 -12   1   23.20    6.70
 -18 -12   1   16.00    8.40
  18 -12  -1   32.00    2.70
 -18  12   1   28.00    3.10
  18  12  -1   23.10    2.80
 -18  12   1   29.40   10.30
  18  12  -1   21.30    7.00
 -16 -12   1  118.09    8.30
  16 -12  -1  117.69   15.40
 -16 -12   1  133.59   15.80
  16 -12  -1  122.49    8.40
 -16 -12   1  108.59   12.70
  16  12  -1  121.59    8.40
 -16  12   1  124.69    8.60
  16  12  -1  133.49   13.30
 -16  12   1  114.49   16.20
  14 -12  -1   82.49   12.40
 -14 -12   1   64.99    4.90
 -14 -12   1   66.59    8.80
 -14 -12   1   77.69   11.90
  14 -12  -1   78.69    5.00
  14  12  -1   61.19    5.10
 -14  12   1   69.19    5.20
  14  12  -1   59.79   10.80
 -14  12   1   73.69   12.50
  14  12  -1   63.79    9.60
 -12 -12   1  129.89   14.60
  12 -12  -1  123.99   15.20
  12 -12  -1  118.59    8.10
 -12 -12   1  118.59   12.30
  12 -12  -1  105.89    9.70
 -12 -12   1  124.99    8.10
 -12  12   1  107.39    8.30
  12  12  -1  123.69    8.20
  12  12  -1  120.59   12.60
  12  12  -1  120.09   13.70
 -12  12   1  117.29   15.10
 -12  12   1  112.29   10.50
  10 -12  -1  169.58   13.90
 -10 -12   1  186.88   12.00
 -10 -12   1  185.98   18.10
  10 -12  -1  167.78   12.00
 -10 -12   1  182.18   16.10
  10 -12  -1  189.18   18.80
 -10  12   1  170.98   12.20
  10  12  -1  180.98   12.10
 -10  12   1  178.08   14.30
  10  12  -1  199.08   17.70
  10  12  -1  193.98   16.20
 -10  12   1  154.08   18.30
   8 -12  -1   72.69    4.80
   8 -12  -1   70.19    7.50
  -8 -12   1   71.09    4.80
  -8 -12   1   75.59   11.40
   8 -12  -1   79.49   11.70
  -8 -12   1   76.59    9.20
   8  12  -1   66.99   10.50
   8  12  -1   61.79    8.90
   8  12  -1   56.69    4.80
  -8  12   1   58.69    5.10
  -8  12   1   71.69   11.90
  -8  12   1   58.19    7.10
  -6 -12   1  137.39   15.20
  -6 -12   1  128.69   13.10
   6 -12  -1  153.88   15.90
   6 -12  -1  144.99   12.30
   6 -12  -1  132.59    9.60
  -6 -12   1  139.79    9.60
  -6  12   1  157.88   12.10
   6  12  -1  134.59    9.60
   6  12  -1  146.39   13.50
  -6  12   1  149.99    9.80
   6  12  -1  137.49   15.00
  -6  12   1  147.59   15.80
  -4 -12   1   95.59    6.10
  -4 -12   1   78.59   12.10
  -4 -12   1   91.49   10.50
   4  12  -1   86.29   10.00
   4  12  -1   76.69    6.10
   4  12  -1   80.59   11.60
  -2 -12   1   61.79   10.50
   2 -12  -1   36.70    6.60
   2 -12  -1   54.39   10.40
  -2 -12   1   65.89    8.40
  -2 -12   1   54.09    3.80
   2  12  -1   54.39    9.90
  -2  12   1   37.20    8.80
  -2  12   1   37.10    6.90
   2  12  -1   50.19    4.00
   2  12  -1   66.09    8.00
   0 -12  -1  138.49   13.80
   0 -12  -1  123.99   10.80
   0 -12   1   98.69   13.80
   0 -12   1  106.99    7.70
   0 -12   1  100.49   11.20
   0  12  -1   99.79    7.80
   0  12   1  122.79   13.10
   0  12  -1  105.19   11.00
   0  12   1  131.69   11.10
   0  12   1  124.39    7.90
   0  12  -1  103.29   13.50
   2 -12   1  454.45   35.90
  -2 -12  -1  412.06   33.10
   2 -12   1  438.06   33.30
  -2 -12  -1  474.05   35.20
   2  12   1  499.75   35.10
  -2  12  -1  461.55   30.50
  -2  12  -1  484.15   33.30
   2  12   1  484.05   33.50
  -2  12  -1  470.35   35.80
   2  12   1  438.26   30.50
   4 -12   1  266.17   21.90
  -4 -12  -1  312.07   24.10
   4 -12   1  280.37   25.00
  -4 -12  -1  302.87   19.30
  -4 -12  -1  311.07   22.70
  -4  12  -1  279.47   22.10
   4  12   1  306.37   24.00
  -4  12  -1  271.27   24.50
   4  12   1  320.37   22.80
  -4  12  -1  261.37   19.40
   4  12   1  293.57   19.40
   6 -12   1  213.88   21.40
  -6 -12  -1  243.58   18.60
   6 -12   1  206.18   18.00
  -6 -12  -1  243.08   15.30
  -6 -12  -1  237.68   20.10
  -6  12  -1  212.98   18.10
   6  12   1  232.08   15.40
  -6  12  -1  238.48   21.30
   6  12   1  251.27   19.30
   6  12   1  243.38   20.20
  -6  12  -1  210.98   15.50
   8 -12   1   93.69    6.70
  -8 -12  -1   85.79   11.50
  -8 -12  -1   83.59   10.30
   8 -12   1   88.39   13.60
  -8 -12  -1   94.29    6.60
   8 -12   1   94.29    9.60
   8  12   1  107.89   10.80
   8  12   1  102.39    6.80
  -8  12  -1   99.89   13.60
  -8  12  -1  105.89   10.20
  -8  12  -1  101.39    6.90
   8  12   1   92.39   11.40
 -10 -12  -1   96.19   11.20
  10 -12   1   82.89   13.80
 -10 -12  -1   90.69   10.10
 -10 -12  -1   88.49    6.10
  10 -12   1   90.39    9.20
  10 -12   1   82.39    6.10
 -10  12  -1   81.49    6.40
 -10  12  -1   86.79   13.80
  10  12   1   89.79   11.10
 -10  12  -1   89.39    9.80
  10  12   1  105.89   11.20
  10  12   1   92.89    6.20
  12 -12   1   63.39    6.90
 -12 -12  -1   41.30    3.40
 -12 -12  -1   39.70    7.90
  12 -12   1   68.29   12.00
  12 -12   1   63.79    9.50
 -12 -12  -1   47.80    8.80
  12  12   1   50.89    8.90
  12  12   1   35.90    3.50
  12  12   1   47.40    8.90
 -12  12  -1   83.09   12.60
 -14 -12  -1   87.79   10.70
  14 -12   1   87.69    6.10
 -14 -12  -1   81.19   11.20
  14 -12   1   91.59   11.20
  14 -12   1   85.59   13.30
 -14 -12  -1   92.09    6.10
  14 -12   1   73.99    8.70
 -14  12  -1   92.39   14.00
 -14  12  -1   84.09    6.40
  14  12   1   93.89   11.00
  14  12   1   80.59   10.90
  14  12   1   87.89    6.20
 -16 -12  -1   54.89    9.80
 -16 -12  -1   67.79    5.40
  16 -12   1   99.29   10.50
  16 -12   1  103.69   14.20
 -16 -12  -1   69.89   11.00
  16 -12   1   86.99    8.70
 -16 -12  -1   64.69    8.90
 -16  12  -1   90.29    5.80
  16  12   1   55.49   10.30
 -16  12  -1   87.49   14.30
  18 -12   1   40.90    6.70
  18 -12   1   30.90    7.50
 -18 -12  -1   37.90    8.30
 -18 -12  -1   33.70    7.00
 -18 -12  -1   28.10    8.40
 -18 -12  -1   35.40    3.00
  18 -12   1   37.30   10.10
  18  12   1   32.80    8.40
 -18  12  -1   41.20   11.50
  18  12   1   32.10    3.10
  18  12   1   29.30    2.80
 -18  12  -1   45.70    3.50
  20 -12   1   56.99   10.00
 -20 -12  -1   61.69    9.20
 -20 -12  -1   74.79    5.10
  20 -12   1   62.89    8.70
 -20 -12  -1   68.99   12.00
  20 -12   1   64.49   13.70
  20 -12   1   82.29    5.30
 -20 -12  -1   73.99   10.80
  20  12   1   66.09   11.00
  20  12   1   72.99    5.30
 -20  12  -1   71.79    5.50
 -20  12  -1   63.39   13.20
  20  12   1   64.19    5.10
 -22 -12  -1   46.40    8.10
 -22 -12  -1   31.10    9.20
  22 -12   1   16.30    2.60
  22 -12   1   19.00    6.40
 -22 -12  -1   40.50    8.90
  22 -12   1   22.30    5.90
 -22  12  -1   -0.90    8.50
 -22  12  -1   21.90    3.00
 -24 -12  -1   22.60    6.80
 -24 -12  -1   17.70    7.80
  24 -12   1   14.80    2.60
 -24 -12  -1   27.10    2.50
  24 -12   1   14.50    5.90
  24 -12   1    9.80    6.30
 -24  12  -1   17.50    2.90
  24  12   1   20.50    2.40
  24  12   1   22.00    2.70
 -26 -12  -1   41.60   10.80
  26 -12   1   38.10    3.50
 -26 -12  -1   36.20    9.00
 -26 -12  -1   39.40    3.40
  26  12   1   38.30    3.50
 -26  12  -1   36.80    3.90
  26  12   1   32.60    3.40
  28 -12   1   59.39    5.10
 -28 -12  -1   50.99   10.50
 -28 -12  -1   69.59    5.10
 -28 -12  -1   52.39   11.80
  28  12   1   72.89    5.20
  28  12   1   70.49    5.10
 -28  12  -1   59.59    5.40
 -30 -12  -1   11.30    9.00
 -30 -12  -1    8.20    6.40
  30 -12   1    9.20    2.40
 -30 -12  -1   13.50    2.30
 -30  12  -1    5.60    2.80
  30  12   1    9.30    2.20
  30  12   1   10.20    2.20
 -32 -12  -1   36.50    3.40
  32 -12   1   29.90    3.50
 -32  12  -1   26.40    4.00
  32  12   1   42.70    3.60
  32  12   1   37.20    3.80
  34 -12   1   18.00    2.80
 -34 -12  -1   13.20    2.70
  34  12   1   14.80    2.70
  34  12   1   16.80    2.60
 -34  12  -1   15.80    3.20
 -36 -12  -1    8.50    2.60
  36 -12   1   13.00    2.60
  36  12   1    8.30    2.80
 -36  12  -1    9.80    3.10
  38 -12   1    9.40    2.60
 -38 -12  -1    4.30    2.50
 -38  12  -1    9.80    3.20
  40 -12   1   12.10    2.60
 -40 -12  -1    7.10    2.70
 -40  12  -1    6.70    3.20
  42 -12   1   11.70    2.50
 -42 -12  -1    9.90    2.80
 -42  12  -1    7.50    3.40
 -41 -13   1    2.40    2.50
  41 -13  -1    1.00    2.60
 -41  13   1    3.60    3.00
  41  13  -1    1.40    2.50
  39 -13  -1    9.20    2.80
 -39 -13   1   14.60    2.70
 -39  13   1   10.00    3.10
  39  13  -1    7.60    2.60
 -37 -13   1   40.70    3.80
  37 -13  -1   33.60    3.90
 -37  13   1   33.90    4.30
  37  13  -1   43.20    4.10
  35 -13  -1   22.80    3.30
 -35 -13   1   26.50    3.10
  35  13  -1   32.50    3.60
 -35  13   1   22.30    3.70
  33 -13  -1   17.20    3.00
 -33 -13   1   18.20    2.70
  33  13  -1   18.70    2.80
 -33  13   1   17.90    3.20
 -31 -13   1   30.40    3.20
 -31 -13   1   20.10    8.30
  31 -13  -1   29.60    3.50
 -31 -13   1   28.80   13.20
  31  13  -1   38.60    3.50
 -31  13   1   34.40    3.90
 -29 -13   1    0.90    5.40
 -29 -13   1    8.10    2.00
  29 -13  -1    6.80    2.50
 -29 -13   1   12.90    9.00
 -29  13   1    8.30    2.70
  29  13  -1   12.50    2.50
  27 -13  -1   -0.80    2.20
 -27 -13   1    8.10    2.00
 -27 -13   1    5.70    5.70
 -27 -13   1    3.20    7.70
  27  13  -1    8.00    2.20
 -27  13   1    5.40    2.60
 -25 -13   1   17.30    9.60
 -25 -13   1   19.50    7.00
 -25 -13   1   27.40    2.70
  25 -13  -1   18.60    2.90
  25  13  -1   29.20    3.00
 -25  13   1   23.60    3.50
 -23 -13   1   10.00    8.70
 -23 -13   1   23.00    7.30
  23 -13  -1   24.40    2.80
 -23 -13   1   24.40    2.50
  23  13  -1   18.10    2.80
 -23  13   1   22.80    3.40
 -21 -13   1   35.30   10.30
 -21 -13   1   50.29    3.80
 -21 -13   1   48.00    9.00
  21 -13  -1   46.60    3.90
  21  13  -1   47.60    4.00
 -21  13   1   42.80    4.30
 -21  13   1   28.60   11.80
  19 -13  -1   49.70   11.80
  19 -13  -1   62.29    4.90
 -19 -13   1   81.19   13.90
 -19 -13   1   55.29    9.60
 -19 -13   1   64.19    9.80
 -19 -13   1   69.99    4.80
 -19  13   1   56.19   13.00
  19  13  -1   67.99    5.00
  19  13  -1   65.39   10.50
 -19  13   1   61.29    5.20
  17 -13  -1   74.29    5.40
 -17 -13   1   71.29   12.80
  17 -13  -1   65.29   13.20
 -17 -13   1   75.39    5.30
 -17 -13   1   76.09   10.20
  17  13  -1   75.19    5.50
 -17  13   1   70.89    5.60
  17  13  -1   79.89   11.00
 -17  13   1   55.49   12.40
  15 -13  -1    9.30    8.10
  15 -13  -1   11.60    2.00
 -15 -13   1   10.20    1.70
 -15 -13   1   12.70    7.60
 -15 -13   1    6.90    5.30
 -15  13   1   15.50    8.60
  15  13  -1    8.20    6.70
 -15  13   1   20.10    2.60
  15  13  -1    6.20    2.00
  15  13  -1    8.30    5.60
 -13 -13   1   28.10    7.00
  13 -13  -1   31.50    5.30
 -13 -13   1   28.30    8.70
 -13 -13   1   34.10    2.80
  13 -13  -1   34.20    9.90
  13 -13  -1   29.60    2.90
 -13  13   1   27.90   10.00
  13  13  -1   29.40    8.80
 -13  13   1   28.50    3.30
  13  13  -1   39.60    8.00
  13  13  -1   30.50    3.00
  11 -13  -1   31.10    3.00
 -11 -13   1   41.80    3.00
 -11 -13   1   32.50    8.80
  11 -13  -1   23.70    9.00
  11 -13  -1   28.00    5.60
 -11 -13   1   34.90    7.50
 -11  13   1   29.40    9.70
 -11  13   1   33.50    6.00
  11  13  -1   38.30    3.10
 -11  13   1   36.10    3.50
  11  13  -1   28.10    7.90
  11  13  -1   39.20    7.70
  -9 -13   1  121.59   14.00
  -9 -13   1  106.29    7.10
  -9 -13   1  107.89   11.50
   9 -13  -1   99.39   14.00
   9 -13  -1  102.89    7.10
   9 -13  -1   91.89    9.60
   9  13  -1  100.79    7.20
  -9  13   1   99.39    7.30
   9  13  -1  120.09   13.80
  -9  13   1   92.59   13.80
  -9  13   1  106.49    9.90
   9  13  -1   98.69   11.30
  -7 -13   1   73.59    4.90
  -7 -13   1   78.39   12.00
   7 -13  -1   60.09    7.80
   7 -13  -1   59.09    4.90
  -7 -13   1   76.09    9.20
   7 -13  -1   60.69   11.50
   7  13  -1   86.69    9.70
  -7  13   1   67.69    7.80
  -7  13   1   65.69   12.20
   7  13  -1   72.39    5.00
  -7  13   1   63.39    5.20
   7  13  -1   75.99   11.40
   5 -13  -1   26.40    8.80
  -5 -13   1   20.80    2.20
   5 -13  -1   18.70    5.20
  -5 -13   1   17.30    7.80
   5 -13  -1   20.40    2.20
  -5 -13   1   26.20    6.40
   5  13  -1   19.80    6.00
  -5  13   1   17.20    7.50
  -5  13   1   16.30    5.00
   5  13  -1   17.00    2.40
  -5  13   1   21.40    2.80
   5  13  -1   15.70    7.00
  -3 -13   1  128.39    9.60
  -3 -13   1  112.19   15.30
   3 -13  -1  170.28   16.50
   3 -13  -1  151.48   12.60
  -3 -13   1  118.29   13.60
   3 -13  -1  151.58    9.60
   3  13  -1  113.59   15.00
   3  13  -1  141.19   13.60
  -3  13   1  158.58    9.80
   3  13  -1  122.49    9.70
  -3  13   1  171.88   13.00
  -3  13   1  166.48   16.20
  -1 -13   1   80.79   10.30
  -1 -13   1   89.29    6.10
  -1 -13   1   71.79   12.50
   1 -13  -1   83.79   12.90
   1 -13  -1   95.09    9.40
   1 -13  -1   84.59    6.20
  -1  13   1   90.59    6.40
   1  13  -1   97.49   10.50
   1  13  -1   82.19    6.30
  -1  13   1  108.79   10.10
  -1  13   1   84.09   12.30
   1  13  -1   79.69   12.30
   1 -13   1  489.95   34.20
  -1 -13  -1  439.66   30.60
  -1 -13  -1  482.55   33.60
   1 -13   1  492.55   36.50
  -1 -13  -1  462.85   35.60
   1 -13   1  463.85   30.60
   1  13   1  460.45   35.60
  -1  13  -1  471.45   36.20
   1  13   1  432.46   30.70
   1  13   1  429.06   33.40
  -1  13  -1  456.55   30.70
  -1  13  -1  491.25   33.80
  -3 -13  -1  191.18   18.20
  -3 -13  -1  210.68   16.10
  -3 -13  -1  211.58   12.50
   3 -13   1  178.58   15.90
   3 -13   1  187.18   12.60
   3 -13   1  168.48   18.70
   3  13   1  173.08   17.60
  -3  13  -1  158.68   15.60
   3  13   1  183.08   12.70
  -3  13  -1  158.98   18.20
   3  13   1  186.68   16.20
  -5 -13  -1   58.09   10.60
   5 -13   1   69.69   11.70
  -5 -13  -1   57.09    8.30
   5 -13   1   60.89    4.10
  -5 -13  -1   55.79    4.10
   5 -13   1   66.29    8.20
  -5  13  -1   56.49    8.00
   5  13   1   49.90    8.40
  -5  13  -1   57.89    4.50
   5  13   1   46.70    4.30
  -5  13  -1   55.59   10.70
   5  13   1   54.59   10.10
   7 -13   1   33.00    6.50
   7 -13   1   30.40    2.40
  -7 -13  -1   21.80    2.30
  -7 -13  -1   33.90    8.50
   7 -13   1   43.30   10.50
  -7 -13  -1   23.90    6.40
  -7  13  -1   30.90    3.00
   7  13   1   20.10    2.70
  -7  13  -1   37.30    6.80
  -7  13  -1   24.50    8.20
   7  13   1   30.80    7.90
   7  13   1   31.00    7.10
   9 -13   1   84.19    6.00
   9 -13   1   82.49   13.30
   9 -13   1   89.29    9.30
  -9 -13  -1   94.99    6.00
  -9 -13  -1   98.49   10.60
  -9 -13  -1   93.09   11.50
  -9  13  -1   90.19   13.50
  -9  13  -1   78.59    9.70
  -9  13  -1   77.89    6.30
   9  13   1   85.59   10.60
   9  13   1   80.19    6.10
   9  13   1   89.29   11.60
 -11 -13  -1   87.29   10.00
  11 -13   1   71.29    5.30
  11 -13   1   66.49    8.30
  11 -13   1   74.09   13.00
 -11 -13  -1   67.49   10.40
 -11 -13  -1   77.19    5.20
 -11  13  -1   63.09   12.50
  11  13   1   79.29   10.00
 -11  13  -1   68.49    5.60
  11  13   1   73.89    5.40
 -11  13  -1   84.29    9.40
  11  13   1   79.09   10.80
  13 -13   1   24.00    9.40
  13 -13   1   22.60    7.10
  13 -13   1   21.60    5.00
 -13 -13  -1   11.40    2.10
 -13 -13  -1    6.60    5.80
 -13 -13  -1   14.60    6.60
 -13  13  -1   21.70    9.20
 -13  13  -1   20.90    2.70
  13  13   1   14.50    6.70
  13  13   1   10.30    6.50
  13  13   1   14.40    2.20
 -15 -13  -1   41.50    3.10
  15 -13   1   33.00   10.10
  15 -13   1   35.80    6.40
  15 -13   1   38.40    8.30
  15 -13   1   37.00    3.20
 -15 -13  -1   45.00    8.50
 -15 -13  -1   32.20    8.40
 -15  13  -1   19.70    9.50
  15  13   1   32.70    3.30
 -15  13  -1   29.90    3.60
  15  13   1   38.90    8.80
 -17 -13  -1   96.09    6.50
  17 -13   1   96.49    6.60
 -17 -13  -1   94.09   12.60
  17 -13   1   91.09   14.60
 -17 -13  -1   88.09   11.30
  17 -13   1   82.89    9.40
  17 -13   1   97.69   11.70
 -17 -13  -1   97.99   11.10
  17  13   1   95.59    6.60
  17  13   1   92.49    6.50
 -17  13  -1   86.89    6.90
 -17  13  -1   86.29   14.90
  17  13   1  101.59   12.30
 -19 -13  -1  180.78   16.60
  19 -13   1  187.08   12.20
 -19 -13  -1  179.58   12.10
 -19 -13  -1  174.18   17.20
  19 -13   1  176.18   15.10
  19 -13   1  188.28   20.30
 -19 -13  -1  183.58   19.00
  19 -13   1  180.28   16.70
 -19  13  -1  174.68   12.40
 -19  13  -1  163.28   20.20
  19  13   1  187.08   12.20
  19  13   1  173.18   12.10
  19  13   1  174.98   17.50
 -21 -13  -1   61.39    9.00
 -21 -13  -1   73.29   12.50
 -21 -13  -1   60.49    4.30
  21 -13   1   54.99    4.50
  21 -13   1   49.30    9.60
  21 -13   1   53.59    8.00
  21  13   1   60.59    4.50
  21  13   1   54.69    4.30
 -21  13  -1   53.09    4.80
 -23 -13  -1    8.30    7.30
 -23 -13  -1   13.30    2.20
 -23 -13  -1   12.80    5.80
  23 -13   1   12.00    2.30
 -23  13  -1   10.40    2.60
  23  13   1   13.00    2.20
  23  13   1   15.70    2.10
 -25 -13  -1   23.60    7.30
  25 -13   1   31.90    3.10
 -25 -13  -1   20.30    9.10
 -25 -13  -1   29.80    3.10
 -25  13  -1   33.40    3.60
  25  13   1   29.90    3.20
  25  13   1   26.80    3.00
 -27 -13  -1    3.30    5.60
 -27 -13  -1    6.30    2.00
  27 -13   1    3.30    2.10
 -27 -13  -1    4.90    7.60
 -27  13  -1    2.20    2.50
  27  13   1    4.20    1.80
  27  13   1    3.90    2.10
 -29 -13  -1    7.00    2.30
  29 -13   1    8.30    2.30
  29  13   1    8.30    2.40
 -29  13  -1   10.80    2.80
  29  13   1   10.80    2.20
  31 -13   1   24.30    3.10
 -31 -13  -1   26.50    3.00
 -31  13  -1   23.60    3.60
  31  13   1   26.90    3.10
 -33 -13  -1   11.80    2.50
  33 -13   1   12.20    2.50
  33  13   1   12.30    2.60
 -33  13  -1   12.40    3.00
 -35 -13  -1    9.90    2.60
  35 -13   1    6.90    2.30
 -35  13  -1    3.00    2.90
  35  13   1    6.60    2.50
 -37 -13  -1    9.60    2.60
  37 -13   1    5.80    2.30
 -37  13  -1    3.40    3.00
  39 -13   1   13.70    2.70
 -39 -13  -1   11.30    2.70
 -39  13  -1   13.00    3.30
  41 -13   1    4.20    2.50
 -41 -13  -1    3.60    2.50
 -41  13  -1    0.50    3.10
 -40 -14   1    3.80    2.50
  40 -14  -1    2.00    2.50
  40  14  -1    2.50    2.60
 -40  14   1    3.20    3.20
  38 -14  -1    8.10    2.60
 -38 -14   1    9.80    2.50
 -38  14   1    6.70    3.30
  38  14  -1    7.80    2.60
  36 -14  -1    6.40    2.50
 -36 -14   1    7.90    2.40
 -36  14   1    6.10    3.10
  36  14  -1    7.50    2.60
  34 -14  -1    9.60    2.50
 -34 -14   1    4.60    2.30
  34  14  -1    3.90    2.40
 -34  14   1   10.00    3.10
  32 -14  -1    7.80    2.50
 -32 -14   1    9.40    2.40
  32  14  -1    9.40    2.50
 -32  14   1    8.40    3.00
 -30 -14   1   11.30    6.40
 -30 -14   1    7.10    9.10
  30 -14  -1   15.80    2.70
 -30 -14   1   21.10    2.60
  30  14  -1   14.30    2.70
 -30  14   1   16.10    3.30
 -28 -14   1   19.00    9.80
 -28 -14   1   26.10    2.70
 -28 -14   1   16.30    6.90
  28 -14  -1   13.30    2.70
 -28  14   1   18.40    3.20
  28  14  -1   24.30    3.00
 -26 -14   1    4.70    8.00
 -26 -14   1    8.70    2.00
  26 -14  -1    2.50    2.30
 -26 -14   1    9.70    6.20
 -26  14   1    4.70    2.60
  26  14  -1    5.60    2.30
 -24 -14   1   10.10    2.10
  24 -14  -1    5.00    2.30
 -24 -14   1    0.00    7.50
 -24 -14   1    7.20    5.50
 -24  14   1    5.30    2.50
  24  14  -1    6.90    2.30
 -22 -14   1   67.09   10.80
  22 -14  -1   80.19    5.60
 -22 -14   1   73.09    5.50
 -22 -14   1   80.19   14.80
  22  14  -1   74.69    5.70
 -22  14   1   76.29    5.90
 -20 -14   1   26.90    9.90
 -20 -14   1   28.80    2.80
 -20 -14   1   20.60    7.10
  20 -14  -1   26.90    3.00
 -20  14   1   27.10    3.40
  20  14  -1   33.20    3.10
 -18 -14   1   32.10    3.00
 -18 -14   1   29.00   10.00
  18 -14  -1   37.10    3.10
 -18 -14   1   25.30    7.20
  18 -14  -1   38.20   11.00
 -18 -14   1   23.40    7.10
  18  14  -1   30.30    3.30
  18  14  -1   28.10    8.40
 -18  14   1   32.20   11.10
 -18  14   1   35.20    3.60
 -16 -14   1   57.39    4.20
 -16 -14   1   35.60   10.70
  16 -14  -1   66.79   13.30
 -16 -14   1   48.40    9.20
  16 -14  -1   62.09    4.30
  16  14  -1   55.09    9.90
  16  14  -1   29.70    9.30
 -16  14   1   64.99    4.80
 -16  14   1   47.70   12.00
  16  14  -1   46.10    4.40
  14 -14  -1   68.49    4.80
 -14 -14   1   51.99    9.20
  14 -14  -1   52.39    7.00
  14 -14  -1   74.39    9.20
 -14 -14   1   61.89   12.30
  14 -14  -1   66.89   12.70
 -14 -14   1   63.79    4.70
  14  14  -1   60.79   11.10
  14  14  -1   65.29    4.80
  14  14  -1   62.09   10.00
 -14  14   1   59.79   13.30
 -14  14   1   60.09    5.10
  12 -14  -1   19.20    2.20
 -12 -14   1   12.70    2.10
 -12 -14   1   17.30    7.80
  12 -14  -1   26.60    5.10
 -12 -14   1    5.70    5.10
  12 -14  -1   25.30    9.50
  12  14  -1    8.80    6.90
  12  14  -1   15.60    2.40
 -12  14   1   29.50    9.80
 -12  14   1   25.70    5.30
 -12  14   1   22.10    2.90
  12  14  -1   16.70    6.40
  10 -14  -1   52.69    7.60
  10 -14  -1   71.99   13.00
 -10 -14   1   77.29    9.80
 -10 -14   1   70.79   11.50
  10  14  -1   57.19   10.90
 -10  14   1   57.59   12.00
  10  14  -1   68.59    4.80
 -10  14   1   57.89    7.80
  10  14  -1   68.69    9.60
 -10  14   1   56.09    5.00
   8 -14  -1   34.30    6.60
  -8 -14   1   45.30   10.40
  -8 -14   1   41.00    3.10
  -8 -14   1   33.10    7.30
   8 -14  -1   37.30    3.20
   8 -14  -1   42.20   10.50
   8  14  -1   43.70    8.20
  -8  14   1   33.80    6.50
  -8  14   1   39.60    3.60
  -8  14   1   31.80    9.70
   8  14  -1   33.90    3.30
   8  14  -1   31.40    8.30
  -6 -14   1   60.09   11.50
   6 -14  -1   57.09    4.50
  -6 -14   1   63.09    4.50
   6 -14  -1   47.50    7.70
   6 -14  -1   59.69   11.90
  -6 -14   1   59.69    9.00
   6  14  -1   76.19   11.40
   6  14  -1   65.29    4.70
   6  14  -1   68.19    9.30
  -6  14   1   64.39   12.10
  -6  14   1   60.79    4.90
  -6  14   1   59.69    8.10
   4 -14  -1   68.29   11.70
  -4 -14   1   54.69    4.40
  -4 -14   1   72.19   11.90
   4 -14  -1   63.89    4.40
   4 -14  -1   59.69    7.90
  -4 -14   1   56.79    8.80
   4  14  -1   59.29   11.30
  -4  14   1   64.69   11.50
   4  14  -1   52.99    8.80
   4  14  -1   55.59    4.60
  -4  14   1   59.89    7.90
  -4  14   1   65.29    4.70
   2 -14  -1   69.49   12.00
   2 -14  -1   64.29    4.60
  -2 -14   1   46.30    9.00
   2 -14  -1   66.09    4.70
  -2 -14   1   47.00   11.20
   2 -14  -1   65.89    8.00
   2  14  -1   47.10   10.80
  -2  14   1   65.39    4.90
  -2  14   1   62.69   11.30
  -2  14   1   71.69    8.70
   2  14  -1   44.60    8.60
   0 -14  -1  351.56   24.60
   0 -14  -1  344.47   21.30
   0 -14  -1  344.27   21.20
   0 -14  -1  372.46   27.60
   0 -14   1  284.87   27.20
   0 -14   1  282.67   21.30
   0 -14   1  277.47   24.80
   0  14   1  350.06   27.20
   0  14   1  348.47   21.40
   0  14   1  353.06   24.80
   0  14  -1  289.07   26.90
   0  14  -1  272.67   21.30
   0  14  -1  290.47   24.60
  -2 -14  -1   61.79    4.90
  -2 -14  -1   64.89    9.00
   2 -14   1   64.79    4.80
  -2 -14  -1   68.49   12.00
   2 -14   1   45.80   11.00
   2 -14   1   66.89    9.40
  -2 -14  -1   72.09    4.80
  -2  14  -1   64.49    8.90
  -2  14  -1   62.09   12.00
   2  14   1   66.59   11.50
   2  14   1   88.29    9.70
  -2  14  -1   60.79    5.10
   2  14   1   72.09    5.10
  -4 -14  -1   51.99    3.50
   4 -14   1   28.10    7.00
  -4 -14  -1   60.19    8.20
   4 -14   1   21.80    9.10
  -4 -14  -1   47.70    3.70
  -4 -14  -1   57.09   10.70
   4  14   1   47.80    8.00
   4  14   1   40.30    9.40
  -4  14  -1   18.00    8.50
   4  14   1   41.70    3.80
  -4  14  -1   42.50    8.10
   6 -14   1   65.99   12.90
  -6 -14  -1   86.49   11.80
   6 -14   1   72.09    5.20
   6 -14   1   72.19    5.10
  -6 -14  -1   74.19    9.60
  -6 -14  -1   68.39    5.10
   6 -14   1   75.09    9.00
   6  14   1   66.99    5.30
  -6  14  -1   80.59    9.40
  -6  14  -1   71.89   12.30
  -6  14  -1   69.49    5.40
   6  14   1   84.29   11.80
   6  14   1   72.69    9.50
   8 -14   1   75.19    8.70
  -8 -14  -1   71.49    5.20
   8 -14   1   67.39   13.10
  -8 -14  -1   66.79    9.30
   8 -14   1   79.49    5.20
  -8 -14  -1   74.49   11.30
  -8  14  -1   78.29    9.50
   8  14   1   68.29   11.30
  -8  14  -1   72.29    5.50
   8  14   1   66.09    5.30
   8  14   1   75.69   10.00
  -8  14  -1   67.49   12.50
 -10 -14  -1   34.50    7.80
  10 -14   1   58.39    7.50
 -10 -14  -1   42.80    9.40
 -10 -14  -1   39.90    3.40
  10 -14   1   51.39   11.80
  10  14   1   37.50    8.70
 -10  14  -1   49.10   11.40
  10  14   1   45.60    3.70
 -10  14  -1   69.29    8.40
  10  14   1   59.09    9.40
  12 -14   1   67.49    8.70
  12 -14   1   77.49   13.90
 -12 -14  -1   62.49   10.90
  12 -14   1   78.89    5.30
 -12 -14  -1   69.39    5.30
 -12 -14  -1   58.99    9.70
  12  14   1   79.19   11.10
 -12  14  -1   86.79   13.70
 -12  14  -1   80.39    5.70
  12  14   1   66.59   10.40
  12  14   1   72.49    5.40
  14 -14   1   33.80    6.40
 -14 -14  -1   34.90    2.90
  14 -14   1   25.50    7.80
 -14 -14  -1   29.90    8.20
  14 -14   1   25.80    9.90
 -14 -14  -1   39.70    8.00
  14 -14   1   32.80    2.90
 -14 -14  -1   29.10    2.90
 -14  14  -1   29.70    3.50
  14  14   1   34.30    3.10
  14  14   1   26.90    7.80
  14  14   1   36.40    8.30
 -14  14  -1   31.90   10.30
  16 -14   1  137.99   17.80
  16 -14   1  147.79   14.70
 -16 -14  -1  118.09   14.00
  16 -14   1  120.09   12.20
  16 -14   1  150.08    9.40
 -16 -14  -1  129.09   15.40
 -16 -14  -1  131.59    9.30
  16  14   1  139.69    9.40
 -16  14  -1  140.99    9.60
  16  14   1  137.49   14.40
  16  14   1  125.99    9.20
 -16  14  -1  152.08   17.80
 -18 -14  -1   37.50    2.90
 -18 -14  -1   21.20    7.90
  18 -14   1   27.30    6.30
  18 -14   1   20.60    9.90
 -18 -14  -1   21.90    6.40
  18 -14   1   28.80    8.50
  18 -14   1   36.00    3.10
 -18 -14  -1   21.10    7.50
 -18  14  -1   18.30    9.90
  18  14   1   32.40    8.80
  18  14   1   28.40    2.80
 -18  14  -1   26.60    3.60
  18  14   1   35.70    3.20
  20 -14   1   35.40    8.70
 -20 -14  -1   40.00    8.20
  20 -14   1   37.50    6.90
 -20 -14  -1   39.00    9.60
  20 -14   1   40.60    3.40
 -20 -14  -1   38.50    3.20
  20  14   1   39.20    3.50
  20  14   1   31.60    3.10
 -20  14  -1   35.00    3.80
 -22 -14  -1    4.90    7.30
 -22 -14  -1   14.70    2.30
 -22 -14  -1   12.40    5.80
  22  14   1   15.80    2.10
 -22  14  -1    6.60    2.80
  22  14   1   11.60    2.30
  24 -14   1    1.70    2.10
 -24 -14  -1    9.40    8.00
 -24 -14  -1    5.10    1.90
 -24 -14  -1    0.20    4.90
  24  14   1    3.40    1.50
  24  14   1    1.90    2.10
 -24  14  -1    3.90    2.70
 -26 -14  -1    3.40    5.50
  26 -14   1    3.30    2.10
 -26 -14  -1    3.60    2.10
 -26 -14  -1   -5.40    6.90
 -26  14  -1    6.90    2.80
  26  14   1    5.50    2.20
  26  14   1    4.90    2.20
  28 -14   1   12.60    2.40
 -28 -14  -1    4.90    2.10
  28  14   1    3.20    2.30
 -28  14  -1   10.60    3.00
 -30 -14  -1   14.50    2.60
  30 -14   1    9.10    2.50
 -30  14  -1    9.70    3.10
  30  14   1   17.00    2.60
  32 -14   1    9.40    2.40
 -32 -14  -1    9.10    2.40
 -32  14  -1    6.10    3.00
  32  14   1    6.30    2.40
  34 -14   1   39.20    3.80
 -34 -14  -1   40.10    3.80
  34  14   1   41.70    4.00
 -34  14  -1   30.80    4.20
 -36 -14  -1   10.40    2.60
  36 -14   1   15.50    2.80
 -36  14  -1   10.00    3.10
 -38 -14  -1    4.80    2.70
  38 -14   1    6.60    2.40
 -38  14  -1    2.10    3.00
  40 -14   1    3.50    2.40
 -40 -14  -1    4.30    2.50
 -40  14  -1   -0.50    3.00
  39 -15  -1   10.00    2.80
 -39 -15   1   12.20    2.60
 -39  15   1    8.40    3.30
  39  15  -1    8.30    2.70
 -37 -15   1    9.90    2.50
  37 -15  -1    8.00    2.70
  37  15  -1    7.90    2.70
 -37  15   1    8.10    3.20
 -35 -15   1    2.50    2.40
  35 -15  -1    2.20    2.50
  35  15  -1    2.50    2.40
 -35  15   1    5.00    3.00
 -33 -15   1    6.10    2.20
  33 -15  -1    4.40    2.60
 -33  15   1    7.70    3.00
  33  15  -1    3.40    2.50
  31 -15  -1   33.80    3.60
 -31 -15   1   29.30    3.20
  31  15  -1   33.10    3.60
 -31  15   1   35.90    4.00
 -29 -15   1   17.80    2.50
 -29 -15   1    2.50    6.20
 -29 -15   1   13.60   10.00
  29 -15  -1   15.30    2.80
  29  15  -1   11.50    2.60
 -29  15   1   10.70    3.00
 -27 -15   1    9.00    2.20
 -27 -15   1    7.80    9.00
  27 -15  -1    3.00    2.40
 -27 -15   1    1.30    5.20
  27  15  -1   12.10    2.50
 -27  15   1    6.00    2.80
 -25 -15   1   25.40    7.90
 -25 -15   1   29.80    3.10
  25 -15  -1   29.50    3.40
 -25 -15   1   37.10   11.50
 -25  15   1   28.10    3.70
  25  15  -1   36.30    3.40
 -23 -15   1   19.10    7.70
 -23 -15   1   23.70    2.80
 -23 -15   1   25.70   10.00
  23 -15  -1   34.00    3.20
 -23  15   1   28.20    3.60
  23  15  -1   27.30    3.20
 -21 -15   1   10.00    5.50
 -21 -15   1   12.90    8.50
 -21 -15   1   13.40    2.20
  21 -15  -1   10.60    2.30
  21  15  -1   14.00    2.40
 -21  15   1    9.00    2.80
 -19 -15   1   15.50    6.30
 -19 -15   1   23.70    2.40
  19 -15  -1   15.90    2.60
 -19 -15   1   11.70    8.30
  19  15  -1   25.40    2.90
 -19  15   1   24.00    3.30
 -17 -15   1   12.70    8.20
 -17 -15   1   19.50    2.20
  17 -15  -1   19.50    2.60
  17 -15  -1   15.30    8.80
 -17  15   1   20.20    3.00
  17  15  -1    7.20    7.30
 -17  15   1    2.80    8.90
  17  15  -1   15.90    2.60
 -15 -15   1   15.40    6.80
  15 -15  -1   26.30    6.50
 -15 -15   1   28.00    2.70
  15 -15  -1   30.60   10.40
 -15 -15   1   26.40    9.40
  15 -15  -1   29.70    2.90
  15 -15  -1   26.60    5.70
 -15  15   1   21.10   10.10
 -15  15   1   28.70    3.40
  15  15  -1   26.30    8.80
  15  15  -1   23.70    7.40
  15  15  -1   26.50    3.00
 -13 -15   1  102.49    7.80
  13 -15  -1  115.19   16.00
  13 -15  -1  114.99   10.80
 -13 -15   1   93.49   15.20
  13 -15  -1  126.99    7.90
 -13 -15   1   90.09   11.70
  13  15  -1   89.69   13.80
 -13  15   1  133.69    8.10
 -13  15   1  125.69   11.40
  13  15  -1   91.69   12.70
  13  15  -1  102.39    7.90
 -13  15   1  124.39   16.40
  11 -15  -1   82.69    6.00
 -11 -15   1   81.19   13.10
  11 -15  -1   84.89    9.20
 -11 -15   1   77.39   10.70
  11 -15  -1   83.09   14.20
 -11 -15   1   84.09    6.00
  11  15  -1   90.49   12.90
  11  15  -1   86.89   11.10
 -11  15   1   88.59    9.60
  11  15  -1   81.29    6.10
 -11  15   1   91.09   14.50
 -11  15   1   88.09    6.30
   9 -15  -1   15.80    8.80
  -9 -15   1   21.00    7.00
  -9 -15   1   14.80    2.10
   9 -15  -1   16.40    5.30
   9 -15  -1   16.50    2.20
  -9 -15   1   10.00    7.40
   9  15  -1   26.50    7.30
  -9  15   1   20.30    5.50
  -9  15   1   22.20    9.20
  -9  15   1   19.10    2.90
   9  15  -1   10.90    7.20
   9  15  -1   15.40    2.40
   7 -15  -1  135.19   12.70
  -7 -15   1  134.59    9.60
   7 -15  -1  137.29   17.00
  -7 -15   1  135.99   16.40
  -7 -15   1  139.89   14.10
   7 -15  -1  137.59    9.60
  -7  15   1  146.99   17.20
   7  15  -1  138.49   14.00
   7  15  -1  151.28   16.80
   7  15  -1  141.59    9.70
  -7  15   1  153.38   13.10
  -7  15   1  146.29    9.80
  -5 -15   1   93.39   14.50
  -5 -15   1   97.99    7.40
  -5 -15   1   99.29   11.70
   5 -15  -1  111.39   11.00
   5 -15  -1  109.99    7.40
   5 -15  -1  108.29   15.00
   5  15  -1  100.99    7.50
  -5  15   1  113.69    7.60
  -5  15   1  116.19   11.10
  -5  15   1  119.69   14.60
   5  15  -1  114.69   14.70
   5  15  -1   99.49   11.70
  -3 -15   1  175.48   11.50
   3 -15  -1  168.48   11.40
   3 -15  -1  180.48   11.50
  -3 -15   1  166.28   15.60
   3 -15  -1  193.98   18.90
  -3 -15   1  173.98   18.50
   3 -15  -1  172.18   14.90
  -3  15   1  170.88   14.80
  -3  15   1  165.18   11.60
   3  15  -1  165.68   11.60
  -3  15   1  155.68   17.30
   3  15  -1  152.28   15.50
   3  15  -1  157.08   17.90
   1 -15  -1   78.29    9.70
  -1 -15   1   96.09    6.10
   1 -15  -1   76.89    5.90
   1 -15  -1   77.29    6.10
  -1 -15   1  114.49   14.10
   1 -15  -1   62.29   12.50
  -1 -15   1   76.09   10.60
  -1  15   1   83.09    6.30
   1  15  -1  107.59   13.50
  -1  15   1   79.89   12.60
  -1  15   1   93.49   10.30
   1  15  -1  119.69   11.30
   1 -15   1   33.60   10.50
  -1 -15  -1   41.80    3.00
   1 -15   1   38.20    3.50
  -1 -15  -1   37.20    7.30
   1 -15   1   32.20    3.10
   1 -15   1   35.50    7.90
  -1 -15  -1   42.50   10.20
  -1 -15  -1   39.90    3.10
   1  15   1   33.40    9.20
  -1  15  -1   30.00    9.20
  -1  15  -1   40.90    7.90
   1  15   1   31.60    3.40
   1  15   1   43.60    7.90
  -1  15  -1   32.10    3.50
   3 -15   1   56.29   11.80
  -3 -15  -1   64.19   11.70
  -3 -15  -1   66.99    4.90
   3 -15   1   71.89    4.90
   3 -15   1   60.89    4.90
  -3 -15  -1   73.59    4.80
  -3 -15  -1   70.39    9.50
   3 -15   1   62.59    9.50
   3  15   1   71.19    9.50
  -3  15  -1   63.49    5.10
   3  15   1   60.29   11.20
   3  15   1   61.29    5.10
  -3  15  -1   64.69   12.20
  -3  15  -1   61.69    9.30
  -5 -15  -1   41.70    7.70
  -5 -15  -1   44.00    9.70
   5 -15   1   30.60    7.10
   5 -15   1   28.10    2.50
   5 -15   1   22.10    2.50
   5 -15   1   16.70    9.00
   5  15   1   45.10    8.30
  -5  15  -1   19.30    3.00
   5  15   1   33.10    2.90
  -5  15  -1   10.90    8.10
  -5  15  -1   28.20    6.70
   5  15   1   32.40    8.70
  -7 -15  -1   21.80    2.60
  -7 -15  -1   25.30    8.70
   7 -15   1   42.70    7.70
  -7 -15  -1   17.10    6.40
   7 -15   1   41.60   10.70
  -7 -15  -1   25.00    2.40
  -7  15  -1   47.00    7.90
   7  15   1   29.50    7.30
  -7  15  -1   33.20    9.70
   7  15   1   23.40    2.80
   7  15   1   22.80    7.90
  -9 -15  -1   11.40    2.20
  -9 -15  -1   12.00    7.40
   9 -15   1   26.60    9.30
  -9 -15  -1   16.80    2.10
   9 -15   1   19.30    5.80
  -9 -15  -1   15.20    6.30
  -9  15  -1   25.80    3.00
   9  15   1   12.90    6.90
   9  15   1   18.10    6.70
  -9  15  -1   12.80    8.10
  -9  15  -1   26.20    6.40
   9  15   1   17.60    2.50
  11 -15   1   59.59   12.70
 -11 -15  -1   69.49    5.00
  11 -15   1   56.99    8.40
  11 -15   1   62.39    4.90
 -11 -15  -1   71.79   11.50
 -11 -15  -1   66.09   10.10
 -11 -15  -1   74.29    4.90
 -11  15  -1   57.39   12.70
 -11  15  -1   62.39    5.30
 -11  15  -1   62.19    9.20
  11  15   1   85.59   10.80
  11  15   1   73.59   11.50
  11  15   1   67.79    5.10
 -13 -15  -1   29.90    2.80
  13 -15   1   21.50    5.90
 -13 -15  -1   37.30    8.20
 -13 -15  -1   37.20    9.40
  13 -15   1   24.90    2.80
  13 -15   1   18.50    9.70
  13  15   1   30.50    8.40
 -13  15  -1   29.80    3.50
 -13  15  -1   23.50   10.10
  13  15   1   47.30    9.30
 -15 -15  -1   31.20    2.90
 -15 -15  -1   29.50    8.90
  15 -15   1   27.00    8.10
  15 -15   1   32.90    3.10
 -15 -15  -1   21.90    7.50
  15 -15   1   26.20   10.40
  15 -15   1   30.10    6.60
  15  15   1   29.10    8.80
 -15  15  -1   26.50   10.70
 -15  15  -1   29.60    3.50
  15  15   1   32.60    3.20
  15  15   1   41.40    9.30
  17 -15   1   43.50    9.50
  17 -15   1   35.60    3.20
 -17 -15  -1   27.10   12.20
  17 -15   1   31.80    6.70
 -17 -15  -1   36.50    3.10
 -17 -15  -1   34.40    9.20
  17  15   1   34.70    3.40
  17  15   1   33.10    2.90
 -17  15  -1   23.30   16.80
 -17  15  -1   35.70    3.80
  19 -15   1   47.60    3.70
 -19 -15  -1   35.90    9.80
  19 -15   1   40.30    7.70
 -19 -15  -1   41.90    7.90
 -19 -15  -1   42.40    3.50
 -19  15  -1   43.40    4.20
  19  15   1   38.60    3.40
  19  15   1   43.40    3.80
  21 -15   1    3.20    2.10
 -21 -15  -1    7.30    5.10
 -21 -15  -1    3.00    1.70
 -21 -15  -1    7.90    7.60
  21  15   1    6.10    2.00
 -21  15  -1    4.90    2.70
  21  15   1    5.20    2.10
  23 -15   1   16.40    2.60
 -23 -15  -1   16.30    6.70
 -23 -15  -1   14.50    8.70
 -23 -15  -1   17.60    2.50
  23  15   1   15.10    2.50
 -23  15  -1    9.10    3.00
  25 -15   1   45.30    3.90
 -25 -15  -1   37.40    3.70
  25  15   1   44.20    3.90
 -25  15  -1   47.40    4.50
 -27 -15  -1    7.40    2.20
  27 -15   1    6.30    2.40
  27  15   1    7.90    2.30
 -27  15  -1    6.10    2.90
 -29 -15  -1   12.60    2.40
  29 -15   1    8.40    2.50
  29  15   1   10.20    2.50
 -29  15  -1    6.40    3.10
  31 -15   1   18.50    3.00
 -31 -15  -1   23.10    3.00
  31  15   1   26.60    3.20
 -31  15  -1   20.60    3.50
  33 -15   1   30.00    3.20
 -33 -15  -1   26.80    3.10
 -33  15  -1   25.10    4.00
  33  15   1   24.80    3.40
 -35 -15  -1    7.60    2.60
  35 -15   1    9.70    2.50
 -35  15  -1    5.20    3.20
 -37 -15  -1    3.40    2.50
  37 -15   1    3.50    2.40
 -37  15  -1    1.20    3.20
  39 -15   1    5.10    2.50
 -39 -15  -1    5.80    2.60
 -39  15  -1    1.00    3.30
 -38 -16   1    4.60    2.50
  38 -16  -1    2.80    2.60
 -38  16   1    2.50    3.10
  38  16  -1    0.90    2.60
 -36 -16   1    7.10    2.50
  36 -16  -1    8.10    2.60
 -36  16   1    7.10    3.20
  36  16  -1    6.80    2.60
  34 -16  -1    0.30    2.50
 -34 -16   1    2.40    2.20
  34  16  -1   -0.70    2.40
 -34  16   1    2.20    3.00
 -32 -16   1    6.20    2.30
  32 -16  -1    3.00    2.60
  32  16  -1    3.50    2.50
 -32  16   1    2.10    2.80
  30 -16  -1   14.20    2.90
 -30 -16   1   16.40    2.60
 -30  16   1   14.00    3.10
  30  16  -1   16.00    2.80
 -28 -16   1   43.10    3.80
  28 -16  -1   42.70    4.10
 -28  16   1   37.20    4.50
  28  16  -1   49.60    4.10
  26 -16  -1   12.90    2.60
 -26 -16   1   13.30    2.30
 -26 -16   1    5.80    8.70
 -26 -16   1    9.20    6.20
 -26  16   1   10.60    3.00
  26  16  -1   14.30    2.70
 -24 -16   1    6.40    8.50
  24 -16  -1    8.20    2.30
 -24 -16   1    2.10    5.20
 -24 -16   1    7.90    2.30
 -24  16   1   10.40    2.90
  24  16  -1    8.20    2.40
 -22 -16   1   37.20    8.90
 -22 -16   1   39.50    3.60
 -22 -16   1   45.30   11.90
  22 -16  -1   45.30    3.80
 -22  16   1   49.80    4.30
  22  16  -1   40.20    3.90
  20 -16  -1    8.40    2.20
 -20 -16   1   10.00    2.00
 -20 -16   1    8.80    5.60
 -20 -16   1    4.60    7.80
  20  16  -1    6.70    2.30
 -20  16   1    7.00    2.80
  18 -16  -1    0.70    2.10
 -18 -16   1   -6.40    7.30
 -18 -16   1    4.90    1.80
  18  16  -1    6.00    2.20
 -18  16   1    1.50    2.70
  16 -16  -1   32.80    3.20
 -16 -16   1   31.40    2.90
 -16 -16   1   25.70    9.90
  16  16  -1   22.70    8.80
 -16  16   1   25.50   10.70
  16  16  -1   31.20    3.30
 -16  16   1   36.10    3.70
 -14 -16   1   21.70    2.50
 -14 -16   1   22.10    9.80
 -14 -16   1   15.10    6.50
  14 -16  -1   24.10    2.70
  14 -16  -1   29.90   10.00
  14 -16  -1   24.90    5.40
  14  16  -1   20.40    2.80
  14  16  -1   23.40    9.00
 -14  16   1   21.90   10.00
 -14  16   1   23.00    3.30
  12 -16  -1   27.50    5.90
  12 -16  -1   29.10    2.80
 -12 -16   1   23.40    2.60
 -12 -16   1   14.80    8.40
  12 -16  -1   26.40   10.20
 -12 -16   1   13.60    6.10
  12  16  -1   19.40    7.30
  12  16  -1   20.50    2.90
 -12  16   1   29.00    6.50
 -12  16   1   14.20    9.60
  12  16  -1   15.20    7.60
 -12  16   1   30.30    3.40
  10 -16  -1   33.80    3.60
  10 -16  -1   32.90    6.80
  10 -16  -1   42.50   11.90
 -10 -16   1   49.50   10.90
 -10 -16   1   50.09    3.60
 -10 -16   1   41.20    8.80
 -10  16   1   45.00    7.80
 -10  16   1   40.00    4.10
  10  16  -1   53.19    9.90
  10  16  -1   35.50    9.70
 -10  16   1   40.40   11.00
  10  16  -1   54.69    3.80
  -8 -16   1  110.29   12.90
   8 -16  -1  109.09   11.30
  -8 -16   1  111.79   15.00
   8 -16  -1  114.99   15.90
   8 -16  -1  110.29    7.70
  -8 -16   1  114.19    7.60
   8  16  -1  115.59   12.60
   8  16  -1  110.29    7.80
  -8  16   1  101.89   11.10
  -8  16   1  103.49    7.90
  -8  16   1  103.19   15.40
   8  16  -1  115.59   15.00
  -6 -16   1   34.50    3.30
   6 -16  -1   37.20    3.10
   6 -16  -1   45.80    3.30
  -6 -16   1   32.30    7.80
   6 -16  -1   44.90   11.40
   6 -16  -1   43.10    7.10
  -6 -16   1   43.50   10.90
   6  16  -1   34.30    8.00
   6  16  -1   29.80    3.50
  -6  16   1   31.80    9.70
  -6  16   1   40.20    3.70
  -6  16   1   43.70    7.70
   6  16  -1   25.50    8.80
  -4 -16   1   28.80    7.20
   4 -16  -1   26.20    9.30
   4 -16  -1   21.30    2.60
   4 -16  -1   10.10    5.80
  -4 -16   1   18.50    8.80
  -4 -16   1   25.80    2.50
  -4  16   1   24.80    6.60
   4  16  -1   16.40    7.90
   4  16  -1   27.70    7.00
   4  16  -1   23.10    2.80
  -4  16   1   13.20    8.10
  -4  16   1   20.80    2.90
  -2 -16   1   11.00    8.10
  -2 -16   1   20.50    6.60
   2 -16  -1   14.20    2.20
   2 -16  -1   18.60    9.00
   2 -16  -1   17.70    2.00
  -2 -16   1   18.80    2.30
   2 -16  -1    9.60    5.70
  -2  16   1   12.20    7.70
   2  16  -1   20.00    2.80
   2  16  -1   16.50    6.40
  -2  16   1   16.70    2.70
   2  16  -1   15.80    8.00
  -2  16   1   19.90    6.30
   0 -16   1   51.89    3.60
   0 -16   1   57.39   12.00
   0 -16  -1   37.10    7.60
   0 -16   1   51.19    3.70
   0 -16  -1   36.60    3.50
   0 -16  -1   41.30   10.80
   0 -16   1   51.49    8.80
   0 -16  -1   44.00    3.80
   0  16  -1   51.19    8.70
   0  16   1   38.50    7.90
   0  16   1   33.50    9.50
   0  16   1   38.60    3.90
   0  16  -1   51.29    4.00
   0  16  -1   44.30   10.40
   2 -16   1   59.49    4.40
  -2 -16  -1   55.89    4.20
   2 -16   1   67.99   13.00
  -2 -16  -1   70.69   12.50
  -2 -16  -1   52.89    9.10
   2 -16   1   50.49    9.10
   2 -16   1   59.09    4.30
  -2 -16  -1   58.39    4.40
  -2  16  -1   57.79    8.90
   2  16   1   50.69    9.10
  -2  16  -1   54.29   11.70
  -2  16  -1   57.09    4.70
   2  16   1   56.39    4.70
   2  16   1   53.39   11.10
   4 -16   1   18.60    6.50
   4 -16   1   20.70    9.50
  -4 -16  -1   18.30    2.30
  -4 -16  -1   18.20    2.50
   4 -16   1   24.00    2.40
   4 -16   1   23.90    2.40
  -4 -16  -1   15.10    6.00
  -4 -16  -1   25.00    9.50
   4  16   1   17.50    7.80
   4  16   1   17.30    6.40
   4  16   1   19.60    2.70
  -4  16  -1   19.20    6.40
  -4  16  -1   23.10    2.90
  -4  16  -1   17.60    8.60
   6 -16   1   45.20    8.60
   6 -16   1   43.80    3.50
  -6 -16  -1   40.10    9.90
  -6 -16  -1   37.40    8.60
   6 -16   1   39.80    3.50
  -6 -16  -1   41.80    3.60
   6 -16   1   30.10   10.40
  -6 -16  -1   45.50    3.40
   6  16   1   37.00    9.80
  -6  16  -1   28.20    9.60
  -6  16  -1   39.00    3.90
   6  16   1   43.60    3.80
  -6  16  -1   33.20    7.60
   6  16   1   46.70    9.10
   8 -16   1   77.79    5.50
  -8 -16  -1   76.39    5.50
   8 -16   1   73.29    9.80
   8 -16   1   76.89   14.10
  -8 -16  -1   69.59    5.60
  -8 -16  -1   62.89   10.20
  -8 -16  -1   89.19   12.80
   8 -16   1   76.19    5.50
  -8  16  -1   86.09   14.20
  -8  16  -1   81.19    5.90
   8  16   1   83.09   12.60
   8  16   1   81.09    5.80
   8  16   1   75.09   10.50
  -8  16  -1   81.19   10.20
 -10 -16  -1  177.58   12.00
  10 -16   1  151.08   19.90
 -10 -16  -1  167.58   16.20
  10 -16   1  185.88   12.00
  10 -16   1  179.18   11.90
  10 -16   1  164.38   16.00
 -10 -16  -1  179.68   11.90
 -10 -16  -1  182.88   18.50
  10  16   1  179.48   12.10
  10  16   1  187.48   18.50
 -10  16  -1  173.28   16.20
 -10  16  -1  158.98   19.30
 -10  16  -1  168.98   12.20
  10  16   1  184.68   16.80
 -12 -16  -1   19.70    2.80
  12 -16   1   24.90    2.70
 -12 -16  -1   30.90    2.70
  12 -16   1   27.70   10.30
 -12 -16  -1   18.10    8.20
  12 -16   1   23.40    6.40
 -12 -16  -1   24.10    7.80
  12 -16   1   25.20    2.80
 -12  16  -1   25.10    6.90
  12  16   1   28.00    2.90
 -12  16  -1   26.40   10.30
  12  16   1   27.40    7.90
 -12  16  -1   19.80    3.20
  12  16   1   19.70    8.20
  14 -16   1   12.80    5.40
  14 -16   1   15.90    2.40
  14 -16   1   11.80    8.00
 -14 -16  -1   21.10    7.90
 -14 -16  -1   16.00    2.30
 -14 -16  -1   21.50    2.40
 -14 -16  -1   19.50    7.20
  14 -16   1   16.90   10.30
 -14  16  -1   18.20    3.00
  14  16   1   21.50    7.90
 -14  16  -1   11.80    8.80
  14  16   1   18.70    7.50
  14  16   1   19.10    2.60
  16 -16   1   28.90    8.70
  16 -16   1   28.50    2.90
 -16 -16  -1   21.10    2.70
 -16 -16  -1   20.80    8.40
  16 -16   1   26.70    6.50
  16  16   1   22.10    3.00
 -16  16  -1   32.20    3.40
  16  16   1   19.80    8.20
 -18 -16  -1   -0.90    6.80
  18 -16   1    3.40    2.20
 -18 -16  -1    2.70    1.70
 -18 -16  -1    3.80    4.40
  18  16   1    2.90    2.40
 -18  16  -1    4.30    2.60
  18  16   1    2.60    2.10
 -20 -16  -1   15.90    8.10
  20 -16   1    5.40    2.20
 -20 -16  -1    8.70    5.20
 -20 -16  -1    9.80    2.00
 -20  16  -1    9.90    2.80
  20  16   1   10.90    2.30
 -22 -16  -1   12.60    2.40
  22 -16   1   13.00    2.50
 -22 -16  -1   13.30    8.50
 -22 -16  -1   14.10    6.20
 -22  16  -1   14.40    3.10
  22  16   1   17.90    2.80
  24 -16   1   10.70    2.50
 -24 -16  -1   10.80    2.10
 -24  16  -1   11.40    3.10
  24  16   1   13.10    2.50
 -26 -16  -1   17.70    2.80
  26 -16   1   16.50    2.90
  26  16   1   17.90    2.70
 -26  16  -1   19.40    3.30
 -28 -16  -1   28.20    3.10
  28 -16   1   23.50    3.10
 -28  16  -1   21.70    3.70
  28  16   1   26.80    3.30
  30 -16   1    6.80    2.60
 -30 -16  -1   13.00    2.50
  30  16   1   14.80    2.60
 -30  16  -1    9.50    3.20
  32 -16   1    6.00    2.60
 -32 -16  -1    6.90    2.30
  32  16   1    4.00    2.50
 -32  16  -1    3.30    3.10
 -34 -16  -1    5.80    2.40
  34 -16   1    8.30    2.70
 -34  16  -1    7.20    3.30
  34  16   1    1.90    2.60
  36 -16   1    8.30    2.70
 -36 -16  -1    4.70    2.60
 -36  16  -1    3.30    3.30
  38 -16   1    4.70    2.60
 -38 -16  -1   -1.10    2.50
 -38  16  -1    0.50    3.30
 -37 -17   1   11.10    2.60
  37 -17  -1   13.00    3.00
 -37  17   1   12.80    3.50
  37  17  -1    8.30    2.80
 -35 -17   1    4.20    2.50
  35 -17  -1    2.80    2.80
  35  17  -1    3.20    2.60
 -35  17   1    4.60    3.20
 -33 -17   1    2.60    2.20
  33 -17  -1    1.30    2.60
 -33  17   1    4.90    3.10
  33  17  -1   -1.00    2.60
 -31 -17   1   17.30    2.60
  31 -17  -1   16.00    2.90
  31  17  -1   14.10    2.80
 -31  17   1   13.40    3.40
 -29 -17   1   12.30    2.30
  29 -17  -1    9.60    2.60
  29  17  -1    9.30    2.60
 -29  17   1    8.10    3.10
  27 -17  -1   -0.10    2.40
 -27 -17   1    3.30    2.00
  27  17  -1    5.20    2.40
 -27  17   1    1.60    2.90
 -25 -17   1    4.10    9.10
 -25 -17   1    9.20    2.30
 -25 -17   1    6.70    6.20
  25 -17  -1   11.40    2.50
 -25  17   1   17.40    3.20
  25  17  -1   10.50    2.60
 -23 -17   1    1.70    2.00
 -23 -17   1   -2.40    5.20
 -23 -17   1    2.80    8.60
  23 -17  -1    2.40    2.20
 -23  17   1    1.90    2.90
  23  17  -1   -0.50    2.20
 -21 -17   1   10.90    2.10
  21 -17  -1   16.10    2.60
 -21 -17   1   12.60    6.10
 -21 -17   1   10.70    9.10
 -21  17   1   14.60    3.20
  21  17  -1    9.50    2.40
 -19 -17   1   18.60    9.80
 -19 -17   1   21.00    2.50
  19  17  -1   18.90    2.80
 -19  17   1   10.80    3.10
  17 -17  -1    9.50    2.30
 -17 -17   1   10.00    2.10
 -17 -17   1    1.30    8.00
 -17  17   1    8.70    2.80
  17  17  -1    2.70    7.30
  17  17  -1    9.40    2.40
 -15 -17   1   12.90    2.00
 -15 -17   1    9.40    8.60
  15 -17  -1   11.10    2.20
  15  17  -1    1.10    7.20
 -15  17   1    9.50    2.80
  15  17  -1   11.50    2.50
 -13 -17   1   43.20    3.70
  13 -17  -1   48.90    3.80
 -13 -17   1   37.90   11.30
  13 -17  -1   31.20    6.60
  13 -17  -1   40.80   12.20
 -13  17   1   37.70   11.60
  13  17  -1   37.40   10.60
 -13  17   1   47.80    4.20
  13  17  -1   42.90    3.90
  11 -17  -1   35.90    3.30
  11 -17  -1   32.00    6.80
 -11 -17   1   23.70    7.30
  11 -17  -1   42.60   11.90
 -11 -17   1   36.20   10.70
 -11 -17   1   34.90    3.20
 -11  17   1   42.60    8.00
  11  17  -1   33.80   10.40
  11  17  -1   39.40    3.50
  11  17  -1   36.50    8.50
 -11  17   1   30.00   10.30
 -11  17   1   40.70    3.90
   9 -17  -1   40.60    3.40
   9 -17  -1   52.99   12.40
  -9 -17   1   36.30    3.30
  -9 -17   1   45.10   11.30
   9 -17  -1   31.90    7.20
  -9 -17   1   28.70    8.10
  -9  17   1   41.70    8.10
   9  17  -1   31.20    8.40
  -9  17   1   26.80   10.60
   9  17  -1   19.20    8.60
   9  17  -1   34.80    3.50
  -9  17   1   38.10    4.00
  -7 -17   1   49.40   11.70
   7 -17  -1   50.29   12.10
   7 -17  -1   56.39    8.70
  -7 -17   1   36.60    8.90
   7 -17  -1   50.59    4.10
  -7 -17   1   51.69    4.00
   7 -17  -1   49.00    3.90
   7  17  -1   32.20    9.90
  -7  17   1   51.59    8.90
  -7  17   1   55.39    4.50
  -7  17   1   38.00   11.00
   7  17  -1   48.50    9.50
   7  17  -1   49.80    4.30
  -5 -17   1   26.40    7.60
  -5 -17   1   31.00   10.50
   5 -17  -1   28.50   10.30
   5 -17  -1   25.30    6.70
   5 -17  -1   33.40    3.00
   5 -17  -1   27.20    2.70
  -5 -17   1   30.20    3.00
   5  17  -1   32.40   10.20
   5  17  -1   26.80    7.90
   5  17  -1   33.00    3.20
  -5  17   1   29.70    9.70
  -5  17   1   39.50    8.00
  -5  17   1   33.30    3.50
  -3 -17   1   20.90    6.80
   3 -17  -1   22.50    2.60
   3 -17  -1   20.90    6.70
  -3 -17   1   23.80    2.60
   3 -17  -1   24.80   10.40
   3 -17  -1   18.50    2.40
  -3 -17   1   25.20    2.60
  -3 -17   1   20.50    9.70
  -3  17   1   29.30    7.20
  -3  17   1   14.00    8.30
   3  17  -1   21.90    2.90
   3  17  -1   36.90    8.00
  -3  17   1   22.00    3.00
   3  17  -1   20.90    8.90
  -1 -17   1   42.10    3.40
  -1 -17   1   39.20    8.30
   1 -17  -1   39.10    3.40
   1 -17  -1   30.90    3.20
  -1 -17   1   48.20   11.90
  -1 -17   1   44.10    3.40
   1 -17  -1   43.80    8.70
   1 -17  -1   41.70   11.50
  -1  17   1   40.50    8.50
   1  17  -1   47.90    8.80
   1  17  -1   38.50    3.60
   1  17  -1   40.50   11.00
  -1  17   1   38.90    3.80
  -1  17   1   41.60   10.60
  -1 -17  -1   22.80    3.00
  -1 -17  -1   25.20    2.70
   1 -17   1   35.00    2.90
   1 -17   1   34.40    2.90
  -1 -17  -1   25.10    7.20
   1 -17   1   25.70    7.00
  -1 -17  -1   24.40    9.90
   1 -17   1   36.20   10.60
   1  17   1   23.30    6.90
  -1  17  -1   27.90    9.60
  -1  17  -1   39.20    3.30
  -1  17  -1   34.70    7.70
   1  17   1   22.90    9.00
   1  17   1   28.50    3.40
   3 -17   1   62.59   10.00
  -3 -17  -1   46.00    9.10
  -3 -17  -1   50.99    4.30
   3 -17   1   55.49   12.40
  -3 -17  -1   62.19   12.70
   3 -17   1   65.69    4.50
  -3 -17  -1   55.79    4.50
   3 -17   1   62.79    4.40
   3  17   1   36.10   10.00
  -3  17  -1   53.49    9.50
   3  17   1   49.30    9.50
  -3  17  -1   62.69    4.70
  -3  17  -1   51.59   11.60
   3  17   1   48.00    4.70
   5 -17   1   14.20    2.30
  -5 -17  -1    9.50    8.80
  -5 -17  -1    7.40    6.10
   5 -17   1    8.80    6.10
  -5 -17  -1   20.50    2.20
   5 -17   1   17.30    2.30
   5 -17   1   10.60    9.30
  -5 -17  -1   16.40    2.40
  -5  17  -1   10.30    8.10
  -5  17  -1    5.90    5.50
  -5  17  -1   15.20    2.80
   5  17   1   15.50    2.70
   5  17   1    9.90    6.20
   5  17   1    6.00    7.10
   7 -17   1  109.29    7.80
  -7 -17  -1  103.09   12.70
  -7 -17  -1  118.89   14.80
   7 -17   1  100.39   16.10
   7 -17   1  111.59    7.80
  -7 -17  -1  110.89    7.80
   7 -17   1  102.09   12.40
  -7 -17  -1  120.29    7.90
   7  17   1  116.09   15.20
  -7  17  -1  109.59   15.90
  -7  17  -1  112.19   12.70
   7  17   1  110.29    7.90
   7  17   1  110.29   13.10
  -7  17  -1  111.69    8.00
   9 -17   1   33.20    8.00
  -9 -17  -1   39.90    8.50
  -9 -17  -1   39.70    3.40
   9 -17   1   35.40    3.20
   9 -17   1   33.70    3.30
   9 -17   1   27.10   10.50
  -9 -17  -1   56.39   11.70
  -9 -17  -1   43.30    3.20
  -9  17  -1   27.30   10.40
  -9  17  -1   34.80    8.20
   9  17   1   37.20    3.60
  -9  17  -1   31.90    3.80
   9  17   1   33.50    9.60
   9  17   1   39.50    9.00
  11 -17   1   22.20    6.90
  11 -17   1   15.70    9.70
 -11 -17  -1   26.50    8.80
  11 -17   1   27.80    2.60
 -11 -17  -1   23.70    2.90
 -11 -17  -1   31.40    2.80
 -11 -17  -1   20.10    7.60
  11 -17   1   27.10    2.70
 -11  17  -1   20.60    9.30
 -11  17  -1   23.40    3.50
 -11  17  -1   25.00    7.20
  11  17   1   30.70    8.20
  11  17   1   34.50    9.90
  11  17   1   21.00    3.00
 -13 -17  -1   15.20   10.60
 -13 -17  -1   23.10    2.50
  13 -17   1   16.40    6.50
  13 -17   1   16.00    2.50
 -13 -17  -1   21.20    8.70
 -13 -17  -1   16.70    2.50
 -13  17  -1   14.80    2.90
  13  17   1   18.20    2.80
  13  17   1   12.00    7.40
 -15 -17  -1    0.70    2.80
  15 -17   1    4.20    5.20
 -15 -17  -1    2.90    6.70
  15 -17   1    3.70    2.00
 -15 -17  -1    2.30    1.80
  15 -17   1    5.40    7.30
 -15  17  -1    4.90    2.70
  15  17   1    1.20    2.20
  15  17   1   -2.10    6.50
 -17 -17  -1    3.70    1.80
  17 -17   1    4.30    2.10
 -17 -17  -1    2.70    6.80
  17  17   1    2.70    2.20
 -17  17  -1    5.90    2.80
 -19 -17  -1   11.70    5.90
 -19 -17  -1    8.90    8.30
  19 -17   1   22.00    2.90
 -19 -17  -1   16.70    2.50
  19  17   1   17.00    2.80
 -19  17  -1   22.60    3.50
 -21 -17  -1    7.90    1.90
  21 -17   1   -0.70    2.30
  21  17   1    5.20    2.40
 -21  17  -1    2.70    2.80
  23 -17   1    9.50    2.50
 -23 -17  -1    9.70    2.30
  23  17   1   10.10    2.50
 -23  17  -1    7.80    2.90
 -25 -17  -1   43.30    3.90
  25 -17   1   46.90    4.10
  25  17   1   46.20    4.10
 -25  17  -1   43.50    4.60
 -27 -17  -1   12.20    2.30
  27 -17   1   10.30    2.60
 -27  17  -1    7.90    3.10
  27  17   1   11.10    2.50
  29 -17   1    2.80    2.40
 -29 -17  -1    4.10    2.20
  29  17   1    0.30    2.40
 -29  17  -1    2.40    3.10
 -31 -17  -1   13.00    2.50
  31 -17   1    5.10    2.60
  31  17   1   12.30    2.70
 -31  17  -1    5.50    3.20
  33 -17   1    8.40    2.60
 -33 -17  -1    4.20    2.40
 -33  17  -1    5.60    3.30
  33  17   1    7.40    2.60
 -35 -17  -1    2.20    2.50
  35 -17   1    2.90    2.60
 -35  17  -1    0.70    3.40
  37 -17   1    1.40    2.60
 -37 -17  -1   -0.60    2.50
 -37  17  -1   -3.00    3.40
 -36 -18   1    8.60    2.50
  36 -18  -1   10.00    2.80
 -36  18   1   10.10    3.40
  36  18  -1    9.20    2.70
  34 -18  -1    3.10    2.80
 -34 -18   1    3.10    2.30
 -34  18   1    6.90    3.30
  34  18  -1    4.20    2.60
 -32 -18   1   16.40    2.90
  32 -18  -1   14.80    3.00
  32  18  -1    9.70    2.90
 -32  18   1   13.60    3.40
 -30 -18   1    4.80    2.20
  30 -18  -1    3.50    2.50
 -30  18   1    3.00    3.10
  30  18  -1    3.30    2.50
 -28 -18   1   11.00    2.30
  28 -18  -1    9.60    2.70
  28  18  -1   14.60    2.70
 -28  18   1    7.00    3.20
  26 -18  -1    2.30    2.40
 -26 -18   1    1.70    2.00
 -26  18   1    2.00    3.10
  26  18  -1    1.00    2.40
  24 -18  -1   11.10    2.60
 -24 -18   1    6.50    2.10
 -24  18   1   10.50    3.10
  24  18  -1    8.50    2.50
 -22 -18   1   18.60   10.30
 -22 -18   1   17.30    7.40
  22 -18  -1   38.60    3.50
 -22 -18   1   25.10    3.10
 -22  18   1   36.40    4.00
  22  18  -1   28.30    3.50
  20 -18  -1    6.80    2.30
 -20 -18   1    2.20    5.80
 -20 -18   1    8.70    8.80
 -20 -18   1    6.80    2.00
  20  18  -1    4.20    2.50
 -20  18   1    5.20    2.90
  18 -18  -1    9.60    2.40
 -18 -18   1   13.20    2.10
 -18 -18   1   15.60    9.70
  18  18  -1   14.40    2.60
 -18  18   1    7.00    2.90
  18  18  -1    2.40    7.70
 -16 -18   1   51.79    4.20
 -16 -18   1   46.00   12.50
  16 -18  -1   55.79    4.30
 -16  18   1   52.59    4.90
  16  18  -1   38.80   11.30
  16  18  -1   52.09    4.50
  14 -18  -1   24.10    2.80
 -14 -18   1   23.50   10.00
 -14 -18   1   17.30    2.50
  14  18  -1   22.00    3.00
  14  18  -1   19.10    8.90
 -14  18   1   23.10    3.40
  12 -18  -1   12.10    2.30
 -12 -18   1   15.80    2.20
 -12 -18   1   20.10    9.60
 -12  18   1   10.10    3.10
  12  18  -1    9.80    8.10
 -12  18   1   16.00   10.10
  12  18  -1   12.20    2.60
 -10 -18   1   15.90    9.10
  10 -18  -1   12.90    2.30
  10 -18  -1   15.30    9.90
  10 -18  -1    3.00    5.50
 -10  18   1    9.70    5.80
 -10  18   1    4.50    8.20
  10  18  -1   22.70    2.70
  10  18  -1   14.40    8.10
 -10  18   1   10.80    3.00
   8 -18  -1   11.20    8.90
  -8 -18   1   18.70    2.40
   8 -18  -1   16.30    6.40
   8 -18  -1   18.90    2.50
  -8 -18   1    4.10    5.80
   8 -18  -1   15.50    2.70
  -8 -18   1   14.40    9.20
   8  18  -1   13.80    6.90
   8  18  -1   11.90    8.30
  -8  18   1   12.20    6.10
  -8  18   1    8.50    8.90
   8  18  -1   12.90    2.60
  -8  18   1   12.40    2.90
   6 -18  -1   15.00    6.30
  -6 -18   1   19.70    2.40
  -6 -18   1   13.90    6.80
  -6 -18   1   19.90    9.80
   6 -18  -1   17.10    2.30
   6 -18  -1   21.20    2.50
   6 -18  -1   20.20    9.20
  -6  18   1   16.60    8.60
   6  18  -1   12.70    6.80
   6  18  -1   15.50    2.80
  -6  18   1   16.40    6.60
  -6  18   1   21.90    3.10
   6  18  -1   12.70    8.50
  -4 -18   1   32.90   11.10
   4 -18  -1   44.90    8.80
   4 -18  -1   45.40   12.50
  -4 -18   1   36.10    3.70
  -4 -18   1   41.60    4.10
   4 -18  -1   51.59    3.80
  -4 -18   1   27.30    8.30
   4 -18  -1   48.40    3.60
   4  18  -1   43.00    9.40
   4  18  -1   30.70   10.50
   4  18  -1   36.80    3.90
  -4  18   1   57.29   12.20
  -4  18   1   64.29    9.30
  -4  18   1   53.59    4.20
  -2 -18   1   12.20    9.20
  -2 -18   1   19.00    7.10
   2 -18  -1   11.10    1.90
   2 -18  -1   10.90    2.20
   2 -18  -1    5.70    6.00
   2 -18  -1   12.30    9.20
  -2  18   1   13.30    8.40
   2  18  -1   22.80    7.30
  -2  18   1    8.10    6.20
   2  18  -1   20.70    2.80
   2  18  -1   10.30    8.30
  -2  18   1   10.80    2.60
   0 -18   1   22.50    2.60
   0 -18  -1   21.40    9.60
   0 -18   1   22.50    2.60
   0 -18  -1   11.40    6.50
   0 -18  -1   18.60    2.50
   0 -18  -1   24.40    2.70
   0 -18   1   24.30   10.30
   0 -18   1   11.80    6.50
   0  18   1   22.30    7.20
   0  18  -1   20.60    3.00
   0  18   1   15.10    8.60
   0  18  -1   15.60    8.10
   0  18   1   23.70    3.10
   0  18  -1   23.80    7.20
  -2 -18  -1   64.79   13.10
  -2 -18  -1   50.89    9.50
  -2 -18  -1   58.89    4.30
   2 -18   1   51.99    4.40
  -2 -18  -1   61.39    4.50
   2 -18   1   45.80    9.30
   2 -18   1   60.29    4.40
   2 -18   1   55.09   13.10
   2  18   1   56.39    4.70
  -2  18  -1   38.10   11.20
   2  18   1   49.40   11.80
  -2  18  -1   52.49    4.70
  -2  18  -1   61.59   10.10
   2  18   1   46.10    9.40
  -4 -18  -1   57.29   12.80
   4 -18   1   27.40    7.90
   4 -18   1   35.90    3.30
   4 -18   1   35.20    3.30
   4 -18   1   23.80   11.10
  -4 -18  -1   36.00    8.60
  -4  18  -1   34.80    3.80
  -4  18  -1   31.00    8.10
   4  18   1   52.89    9.60
   4  18   1   57.79   11.90
  -4  18  -1   33.40   10.80
   6 -18   1   30.90    8.00
  -6 -18  -1   31.00    8.40
   6 -18   1   33.00    3.20
   6 -18   1   33.70   11.80
  -6 -18  -1   37.00    3.30
  -6 -18  -1   37.80   11.50
   6 -18   1   32.50    3.20
  -6 -18  -1   32.40    3.10
  -6  18  -1   37.60    8.80
   6  18   1   29.60    8.00
  -6  18  -1   31.50    3.60
   6  18   1   34.80    3.50
  -6  18  -1   28.60   10.50
   6  18   1   32.40    9.70
   8 -18   1   28.50    2.80
  -8 -18  -1   13.30    9.00
  -8 -18  -1   20.40    7.40
   8 -18   1   29.90    2.80
   8 -18   1   18.40    9.90
   8 -18   1   25.70    7.70
  -8 -18  -1   24.70    2.90
  -8 -18  -1   25.70    2.70
   8  18   1   25.50    9.20
  -8  18  -1   28.30    3.40
  -8  18  -1   24.60    7.50
   8  18   1   21.60    7.40
  -8  18  -1   27.00   10.40
   8  18   1   24.00    3.30
 -10 -18  -1   37.00    3.50
 -10 -18  -1   28.00    8.50
 -10 -18  -1   37.00   10.90
  10 -18   1   39.80    3.40
  10 -18   1   36.10    8.50
 -10 -18  -1   36.80    3.40
  10 -18   1   36.10    3.40
  10  18   1   35.80   10.10
  10  18   1   38.60    9.20
 -10  18  -1   44.60    9.20
 -10  18  -1   43.50    4.00
  10  18   1   40.50    3.60
 -12 -18  -1    2.50    1.80
  12 -18   1    0.30    2.00
 -12 -18  -1   -1.10    6.90
 -12 -18  -1    1.60    2.20
  12 -18   1    0.90    5.50
  12  18   1   -0.80    6.50
 -12  18  -1    3.70    5.80
 -12  18  -1    4.10    2.70
  12  18   1   -0.50    2.30
 -14 -18  -1    7.90    7.90
  14 -18   1    7.50    2.20
 -14 -18  -1   10.10    2.00
  14  18   1    8.60    7.90
 -14  18  -1    9.00    2.80
  14  18   1    6.90    2.50
 -16 -18  -1   29.10    3.20
  16 -18   1   38.70    3.30
 -16 -18  -1   27.60   10.10
  16  18   1   21.70    8.60
 -16  18  -1   38.10    4.10
  16  18   1   28.80    3.50
 -18 -18  -1   18.70    2.50
  18 -18   1   17.40    2.80
 -18  18  -1   15.40    3.30
  18  18   1   16.00    2.70
 -20 -18  -1    5.30    2.00
  20 -18   1    0.40    2.20
  20  18   1    5.40    2.30
 -20  18  -1    1.80    2.80
 -22 -18  -1   25.20    2.90
  22 -18   1   16.40    3.10
 -22  18  -1   18.00    3.40
  22  18   1   26.50    3.30
  24 -18   1    7.90    2.50
 -24 -18  -1    8.90    2.10
 -24  18  -1    8.10    3.00
  24  18   1   11.20    2.60
 -26 -18  -1   -0.50    2.20
  26 -18   1    2.20    2.50
  26  18   1    2.10    2.40
 -26  18  -1    1.10    3.00
 -28 -18  -1    4.90    2.30
  28 -18   1    8.70    2.70
 -28  18  -1    6.90    3.10
  28  18   1    5.60    2.60
  30 -18   1    4.50    2.60
 -30 -18  -1    4.00    2.30
  30  18   1    4.80    2.50
 -30  18  -1    2.60    3.20
 -32 -18  -1    4.50    2.40
  32 -18   1    5.70    2.60
  32  18   1    5.50    2.60
 -32  18  -1    1.90    3.20
 -34 -18  -1    4.20    2.40
  34 -18   1    8.90    2.70
 -34  18  -1    9.50    3.40
  36 -18   1    3.20    2.60
 -36 -18  -1   -3.10    2.50
 -36  18  -1    0.50    3.40
  35 -19  -1    3.30    2.80
 -35 -19   1    0.40    2.40
 -35  19   1    2.40    3.30
  35  19  -1    1.80    2.70
 -33 -19   1    4.30    2.30
  33 -19  -1    6.00    2.70
 -33  19   1    5.50    3.40
  33  19  -1    2.80    2.60
  31 -19  -1   17.50    3.20
 -31 -19   1   20.30    2.80
 -31  19   1   15.90    3.70
  31  19  -1   13.30    3.00
  29 -19  -1    6.90    2.90
 -29 -19   1    6.70    2.30
  29  19  -1    4.70    2.80
 -29  19   1   11.80    3.30
 -27 -19   1    2.70    2.10
  27 -19  -1    1.30    2.60
  27  19  -1    2.60    2.50
 -27  19   1    1.20    3.00
  25 -19  -1    4.60    2.50
 -25 -19   1    3.40    2.10
 -25  19   1    2.50    2.90
  25  19  -1    7.20    2.60
  23 -19  -1    5.10    2.50
 -23 -19   1    4.60    2.20
  23  19  -1    5.90    2.50
 -23  19   1    5.40    3.00
 -21 -19   1    7.90    2.10
  21 -19  -1   10.90    2.60
 -21  19   1    7.50    3.00
  21  19  -1   10.10    2.60
 -19 -19   1   16.50   10.10
  19 -19  -1   15.90    2.80
 -19 -19   1   18.40    2.70
 -19  19   1   15.80    3.40
  19  19  -1   22.90    3.10
 -17 -19   1    7.60    8.90
 -17 -19   1    4.30    1.90
  17 -19  -1    4.70    2.40
  17  19  -1   -1.30    7.60
 -17  19   1    5.60    2.90
  17  19  -1    4.10    2.40
 -15 -19   1   11.00    8.60
  15 -19  -1   15.30    2.70
 -15 -19   1   12.80    2.20
  15  19  -1   14.30    9.20
  15  19  -1    9.30    2.70
 -15  19   1   17.00    3.20
  13 -19  -1   36.20    3.50
 -13 -19   1   28.90   10.90
 -13 -19   1   31.70    3.10
 -13  19   1   37.60    3.90
  13  19  -1   30.20    3.50
  13  19  -1   18.40    9.10
  11 -19  -1    6.60    2.30
 -11 -19   1   13.60    2.20
 -11 -19   1    3.80    8.70
 -11  19   1    9.90    2.80
  11  19  -1   11.50    8.40
  11  19  -1    9.80    2.60
   9 -19  -1   10.50    2.20
   9 -19  -1    2.20   10.20
  -9 -19   1   10.00    9.40
  -9 -19   1   12.80    2.20
   9 -19  -1    5.40    6.00
   9  19  -1    7.40    2.60
   9  19  -1   11.50    8.60
  -9  19   1    1.60    8.40
  -9  19   1   10.30    3.00
  -7 -19   1   54.49    4.20
   7 -19  -1   51.89    4.60
  -7 -19   1   51.69   13.10
   7 -19  -1   49.90    9.70
   7 -19  -1   56.49    4.30
   7 -19  -1   54.69   13.70
  -7 -19   1   38.70    9.40
   7  19  -1   31.30   10.80
   7  19  -1   49.50    4.50
  -7  19   1   43.90   11.30
  -7  19   1   54.39    9.80
  -7  19   1   49.50    4.70
   5 -19  -1   28.80   11.40
   5 -19  -1   22.20    7.40
  -5 -19   1   20.50    2.80
  -5 -19   1   12.80    6.80
  -5 -19   1   13.20    9.50
   5 -19  -1   26.00    2.60
   5 -19  -1   30.60    3.00
  -5  19   1   22.20    9.60
   5  19  -1   19.20    9.30
  -5  19   1   33.50    3.40
   5  19  -1   20.30    3.40
   5  19  -1   22.90    7.80
  -5  19   1   33.30    8.10
   3 -19  -1   16.30    9.60
  -3 -19   1   14.20    7.10
   3 -19  -1   14.70    2.60
  -3 -19   1   10.80    9.60
   3 -19  -1   12.40    6.60
  -3 -19   1   13.30    2.50
   3 -19  -1   12.50    2.30
  -3  19   1   19.30    3.00
   3  19  -1   11.20    2.70
  -3  19   1   14.90    6.60
   3  19  -1   10.70    6.60
  -3  19   1    6.90    8.60
   3  19  -1    7.70    7.90
  -1 -19   1   35.70    8.40
   1 -19  -1   20.60    7.30
   1 -19  -1   23.60    2.90
   1 -19  -1   21.80    2.70
   1 -19  -1   17.70   10.30
  -1 -19   1   38.10   11.80
  -1  19   1   23.00    9.60
   1  19  -1   40.80    9.00
  -1  19   1   26.90    3.40
   1  19  -1   30.80   10.10
  -1  19   1   22.40    7.70
  -1 -19  -1  113.79    7.80
   1 -19   1   92.69   12.60
  -1 -19  -1  105.69    7.60
  -1 -19  -1   92.09   12.70
   1 -19   1  106.99    7.70
  -1 -19  -1  108.19   16.50
   1 -19   1   97.29   16.30
   1 -19   1  114.79    7.70
   1  19   1  114.59    7.90
   1  19   1  111.59   13.30
  -1  19  -1  110.89   13.50
  -1  19  -1  100.89   15.60
   1  19   1  107.09   15.50
  -1  19  -1  108.19    7.90
   3 -19   1   39.20    3.60
  -3 -19  -1   43.30    3.60
  -3 -19  -1   36.10    8.80
   3 -19   1   41.40    3.60
   3 -19   1   20.40   11.30
  -3 -19  -1   43.30   11.90
  -3 -19  -1   44.60    3.80
   3 -19   1   26.40    8.00
   3  19   1   46.60    3.90
  -3  19  -1   38.90    4.00
   3  19   1   39.70   10.90
  -3  19  -1   29.10    8.50
   3  19   1   38.80    9.20
  -3  19  -1   30.60   10.70
  -5 -19  -1   14.10    7.10
   5 -19   1    1.90   10.70
  -5 -19  -1   18.60    2.40
  -5 -19  -1   16.90    9.90
   5 -19   1   11.70    2.30
   5 -19   1    9.90    6.20
  -5 -19  -1   20.70    2.70
   5 -19   1   11.70    2.20
  -5  19  -1   -0.20    8.00
  -5  19  -1   10.30    2.90
   5  19   1   18.50    7.60
   5  19   1    9.80    8.70
   5  19   1   20.90    3.00
  -5  19  -1    5.40    6.10
   7 -19   1   20.10    2.70
   7 -19   1   17.90    7.30
  -7 -19  -1   17.30    2.80
  -7 -19  -1   11.30   10.20
  -7 -19  -1   12.30    6.80
   7 -19   1   19.90    2.70
  -7 -19  -1   16.70    2.50
  -7  19  -1   18.80    7.00
   7  19   1   13.00    8.20
  -7  19  -1   23.20    3.20
   7  19   1   16.50    7.30
   7  19   1   18.60    2.90
   9 -19   1    6.40    6.30
  -9 -19  -1    7.70    2.00
  -9 -19  -1    2.80    2.00
  -9 -19  -1   -1.20    8.20
   9 -19   1    8.30    2.10
   9 -19   1   12.70    2.10
   9  19   1    7.20    2.60
   9  19   1    6.70    7.90
  -9  19  -1    8.60    6.20
  -9  19  -1   11.30    2.80
  11 -19   1   14.20    2.50
  11 -19   1    9.30    6.20
 -11 -19  -1   14.80    2.40
 -11 -19  -1   12.30    9.00
  11  19   1   13.60    2.70
 -11  19  -1   12.90    3.10
  11  19   1   10.70    8.50
  13 -19   1   12.60    2.40
 -13 -19  -1   13.00    2.40
 -13 -19  -1   12.00    8.70
 -13  19  -1   10.00    2.90
  13  19   1    9.20    8.00
  13  19   1   15.60    2.80
 -15 -19  -1    8.10   11.30
  15 -19   1    7.40    2.30
 -15 -19  -1    9.20    2.10
  15  19   1    9.60    2.60
 -15  19  -1   12.10    3.00
  17 -19   1   19.60    2.90
 -17 -19  -1   16.80    2.60
 -17  19  -1   16.10    3.20
  17  19   1   16.50    2.90
 -19 -19  -1   33.40    3.30
  19 -19   1   29.70    3.40
  19  19   1   35.60    3.60
 -19  19  -1   26.60    4.00
  21 -19   1    3.00    2.50
 -21 -19  -1    8.40    2.00
 -21  19  -1    4.90    3.20
  21  19   1    5.70    2.40
  23 -19   1   -1.90    2.40
 -23 -19  -1    3.40    2.10
  23  19   1    2.60    2.40
 -23  19  -1   -0.60    2.90
 -25 -19  -1    1.00    2.10
  25 -19   1    3.90    2.50
  25  19   1    2.70    2.50
 -25  19  -1    3.50    3.10
 -27 -19  -1    1.00    2.20
  27 -19   1    2.30    2.60
  27  19   1   -0.20    2.60
 -27  19  -1    1.00    3.10
  29 -19   1    5.00    2.70
 -29 -19  -1    0.10    2.30
  29  19   1    0.40    2.60
 -29  19  -1   -1.30    3.10
 -31 -19  -1    9.50    2.50
  31 -19   1   12.20    2.80
 -31  19  -1   10.60    3.30
  31  19   1   13.80    2.90
 -33 -19  -1    2.10    2.40
  33 -19   1    8.00    2.80
 -33  19  -1    1.70    3.30
  33  19   1    3.40    3.80
  35 -19   1    2.80    2.80
 -35 -19  -1    0.80    2.50
 -35  19  -1   -0.80    3.30
 -32 -20   1    3.20    2.40
  32 -20  -1    2.20    2.90
 -32  20   1    3.50    3.40
  32  20  -1    2.00    2.70
  30 -20  -1   12.20    3.10
 -30 -20   1   15.80    2.60
 -30  20   1   13.10    3.50
  30  20  -1   12.30    2.90
  28 -20  -1    5.90    2.90
 -28 -20   1    6.00    2.30
  28  20  -1    5.90    2.60
 -28  20   1    6.40    3.30
  26 -20  -1    6.30    2.70
 -26 -20   1    5.70    2.30
 -26  20   1    5.20    3.20
  26  20  -1    6.40    2.70
 -24 -20   1    1.30    2.10
  24 -20  -1    1.90    2.60
 -24  20   1    3.10    3.00
  24  20  -1    1.30    2.40
  22 -20  -1   14.70    2.90
 -22 -20   1   14.90    2.80
  22  20  -1   19.80    3.10
 -22  20   1   13.60    3.30
 -20 -20   1    2.60    2.00
  20 -20  -1    2.50    2.40
 -20  20   1    2.90    2.90
  20  20  -1    2.40    2.40
 -18 -20   1    6.60    2.10
 -18 -20   1    4.00   10.80
  18 -20  -1    5.30    2.50
 -18  20   1    3.60    3.00
  18  20  -1    4.40    2.50
  16 -20  -1   19.70    3.00
 -16 -20   1    2.40    8.90
 -16 -20   1   15.30    2.50
 -16  20   1   20.70    3.50
  16  20  -1   15.00    2.80
  16  20  -1   12.60    9.50
 -14 -20   1    9.00    9.20
 -14 -20   1    5.30    2.10
  14 -20  -1    9.40    2.40
  14  20  -1    6.20    2.50
 -14  20   1   11.20    3.20
  14  20  -1    1.30    7.60
 -12 -20   1    6.80    9.60
 -12 -20   1    8.40    2.10
  12 -20  -1   13.70    2.50
  12  20  -1    2.90    8.40
 -12  20   1   13.60    2.90
  12  20  -1    7.60    2.70
  10 -20  -1   16.30    2.80
 -10 -20   1   14.00    9.50
 -10 -20   1   19.20    2.60
  10  20  -1   17.60    2.90
  10  20  -1   11.80    8.80
 -10  20   1   15.20    3.20
  -8 -20   1   10.80    2.20
  -8 -20   1    5.20    9.40
   8 -20  -1    8.90    2.30
   8  20  -1    7.40    8.00
   8  20  -1   12.40    2.80
  -8  20   1   13.50    3.00
  -6 -20   1   11.70   10.00
  -6 -20   1   15.00    2.50
   6 -20  -1    8.60   10.10
   6 -20  -1   18.10    2.70
   6 -20  -1   20.00    3.90
   6 -20  -1   13.70    6.90
   6  20  -1   14.10    2.90
  -6  20   1   17.70    3.10
  -6  20   1   10.00    9.80
   6  20  -1   14.30    8.90
  -6  20   1    9.40    8.80
   4 -20  -1   32.90    8.70
  -4 -20   1   26.90   11.50
   4 -20  -1   30.10   11.50
  -4 -20   1   28.00    8.60
  -4 -20   1   39.30    3.30
   4 -20  -1   29.20    3.20
   4 -20  -1   35.80    3.50
  -4  20   1   35.30   11.40
  -4  20   1   36.50    8.60
   4  20  -1   43.40   10.70
   4  20  -1   36.60    3.70
  -4  20   1   33.70    3.80
   4  20  -1   40.50   11.70
  -2 -20   1   10.90    2.10
   2 -20  -1    0.20    6.10
   2 -20  -1    7.20    9.00
  -2 -20   1    7.60    9.80
  -2 -20   1    9.40    7.10
   2 -20  -1    5.00    2.00
   2 -20  -1    7.60    2.30
   2  20  -1    9.80    2.60
   2  20  -1    9.90    7.20
  -2  20   1    4.70    2.80
  -2  20   1    9.10    8.80
  -2  20   1    0.30    6.00
   2  20  -1    7.40    8.80
   0 -20  -1   21.60    2.90
   0 -20   1   22.80   12.20
   0 -20   1   33.20    3.80
   0 -20   1   26.80    3.00
   0 -20  -1   25.70    3.10
   0 -20  -1   16.80    7.70
   0 -20   1   18.90    8.10
   0 -20  -1   21.80   10.70
   0  20   1   23.20    9.80
   0  20  -1   27.40    8.10
   0  20  -1   26.60    3.40
   0  20   1   35.50    8.60
   0  20  -1   33.60   10.80
   0  20   1   26.20    3.50
   2 -20   1   31.90    3.40
  -2 -20  -1   38.10    3.70
  -2 -20  -1   37.30    3.30
   2 -20   1   23.00    8.10
  -2 -20  -1   25.20    8.50
  -2 -20  -1   32.50   11.70
   2 -20   1   33.50    3.40
   2  20   1   25.70   10.00
   2  20   1   37.30    3.70
   2  20   1   32.40    9.40
  -2  20  -1   35.20    8.90
  -2  20  -1   36.70    3.80
   4 -20   1   30.20    8.50
   4 -20   1   49.30    4.30
  -4 -20  -1   52.89    4.10
  -4 -20  -1   51.49   12.70
  -4 -20  -1   55.69    4.40
  -4 -20  -1   43.00    9.50
   4 -20   1   47.80    4.20
  -4  20  -1   43.40    9.80
   4  20   1   47.90   11.80
   4  20   1   55.29    4.60
  -4  20  -1   50.99    4.60
  -6 -20  -1    5.50    6.60
  -6 -20  -1   12.00    9.60
  -6 -20  -1    9.70    2.10
   6 -20   1    5.20    6.50
   6 -20   1   10.00    2.20
  -6 -20  -1    7.30    2.30
   6 -20   1   13.20    2.30
   6  20   1   11.40    8.80
  -6  20  -1   14.60    7.20
   6  20   1    6.60    7.80
   6  20   1   13.20    2.80
  -6  20  -1   13.90    3.00
   8 -20   1    5.40    6.00
  -8 -20  -1    5.90    9.20
   8 -20   1    3.90    2.10
  -8 -20  -1    5.40    2.20
   8 -20   1    9.70    2.20
  -8  20  -1    2.00    6.20
   8  20   1    4.00    2.60
  -8  20  -1    7.20    2.80
   8  20   1    0.10    7.80
 -10 -20  -1   38.40    3.50
  10 -20   1   40.30    3.60
 -10 -20  -1   29.10   11.00
  10  20   1   33.90    3.80
  10  20   1   28.00   10.60
 -10  20  -1   36.10    4.00
  12 -20   1    1.20    2.20
 -12 -20  -1    4.90    2.10
 -12 -20  -1    1.40    9.70
  12  20   1    2.20    2.50
 -12  20  -1    2.30    2.90
  14 -20   1    8.70    2.40
 -14 -20  -1    9.40    2.20
 -14  20  -1    4.00    2.90
  14  20   1    7.40    2.70
 -16 -20  -1   49.20    4.20
  16 -20   1   51.09    4.40
  16  20   1   52.39    4.50
 -16  20  -1   49.50    4.90
  18 -20   1    6.20    2.50
 -18 -20  -1    7.60    2.10
 -18  20  -1    7.80    2.90
  18  20   1    5.90    2.60
  20 -20   1    1.20    2.50
 -20 -20  -1    2.60    2.00
 -20  20  -1    3.70    3.00
  20  20   1    0.40    2.50
  22 -20   1    0.80    2.50
 -22 -20  -1    1.40    2.20
 -22  20  -1    2.70    3.00
  22  20   1    1.70    2.60
 -24 -20  -1   -0.10    2.20
  24 -20   1   -0.90    2.50
 -24  20  -1    3.30    3.30
  24  20   1   -0.30    2.40
 -26 -20  -1   -0.10    2.40
  26 -20   1    3.40    2.70
  26  20   1    1.70    2.60
 -26  20  -1    3.90    3.10
 -28 -20  -1    4.40    2.40
  28 -20   1    7.90    2.70
 -28  20  -1    5.80    3.30
  28  20   1    5.50    2.60
  30 -20   1    3.10    2.70
 -30 -20  -1    5.60    2.40
 -30  20  -1    5.80    3.30
  30  20   1    5.40    2.80
  32 -20   1    6.30    2.80
 -32 -20  -1    3.30    2.40
  32  20   1    4.70    2.90
 -32  20  -1    4.10    3.40
 -31 -21   1    2.20    2.40
  31 -21  -1    6.00    2.90
 -31  21   1    5.40    3.30
  31  21  -1    2.60    2.80
  29 -21  -1    4.50    2.90
 -29 -21   1    3.60    2.10
 -29  21   1    1.30    3.20
  29  21  -1    4.20    2.90
  27 -21  -1    4.10    2.80
 -27 -21   1    4.90    2.30
  27  21  -1    3.60    2.80
 -27  21   1    6.60    3.30
  25 -21  -1    8.40    2.80
 -25 -21   1    6.50    2.40
  25  21  -1    7.80    2.80
 -25  21   1    9.40    3.30
  23 -21  -1   12.60    2.80
 -23 -21   1    8.20    2.40
  23  21  -1   10.00    2.80
 -23  21   1   12.30    3.30
 -21 -21   1   -0.20    2.10
  21 -21  -1    1.70    2.50
 -21  21   1    1.30    3.00
  21  21  -1    3.80    2.60
 -19 -21   1    8.50    2.20
  19 -21  -1    6.20    2.70
  19  21  -1   10.10    2.70
 -19  21   1    2.80    3.20
  17 -21  -1    2.00    2.40
 -17 -21   1    3.60    2.10
 -17  21   1    4.40    3.00
  17  21  -1    6.10    2.60
 -15 -21   1    6.30    2.00
  15 -21  -1   10.90    2.50
 -15  21   1    7.40    3.00
  15  21  -1    6.50    2.60
  13 -21  -1   38.10    3.60
 -13 -21   1   28.60    3.30
 -13  21   1   33.50    4.00
  13  21  -1   32.10    3.70
  13  21  -1   20.60   10.60
 -11 -21   1    6.50    2.00
  11 -21  -1    5.30    2.30
  11  21  -1    6.80    2.60
  11  21  -1    8.00    9.10
 -11  21   1    1.70    2.80
   9 -21  -1   16.80    2.80
  -9 -21   1   15.90    2.60
  -9  21   1   18.00    3.30
   9  21  -1   17.80    9.50
   9  21  -1   16.80    3.00
  -7 -21   1   48.10    4.20
   7 -21  -1   52.89    4.40
  -7  21   1   50.09    4.70
   7  21  -1   33.90   11.50
   7  21  -1   52.39    4.50
   5 -21  -1   14.90    2.70
  -5 -21   1   14.30    2.50
   5  21  -1   11.40   10.60
   5  21  -1   11.20    2.90
  -5  21   1   12.40    3.00
   3 -21  -1    0.60    2.00
   3 -21  -1    5.10    2.30
  -3 -21   1    7.80    2.20
   3 -21  -1   -3.40    6.70
  -3  21   1    0.50    6.40
  -3  21   1    2.80    2.80
  -3  21   1    8.50    8.90
   3  21  -1    7.50    2.70
  -1 -21   1   22.30    7.70
   1 -21  -1    8.30    2.30
   1 -21  -1    8.90    9.70
   1 -21  -1   11.10    2.40
   1 -21  -1    5.00    7.30
  -1  21   1   11.90    3.00
   1  21  -1   23.70    8.10
  -1  21   1   15.50    9.50
  -1  21   1    9.60    7.30
  -1 -21  -1   51.69    4.50
  -1 -21  -1   56.59   14.00
   1 -21   1   60.79    4.70
  -1 -21  -1   62.59    4.90
  -1 -21  -1   38.40   10.20
   1 -21   1   41.20   10.30
   1  21   1   54.09   11.00
   1  21   1   60.19    5.00
  -1  21  -1   60.49   11.50
  -1  21  -1   62.29    4.90
   1  21   1   44.80   12.60
  -3 -21  -1   13.50    2.60
  -3 -21  -1   18.40    2.90
   3 -21   1   17.30    2.80
  -3 -21  -1   17.10   11.10
   3 -21   1   19.30    2.80
   3 -21   1    7.90    6.70
  -3 -21  -1   10.60    7.40
   3  21   1   21.60    3.20
   3  21   1   22.10   10.20
  -3  21  -1   14.30    8.10
  -3  21  -1   20.70    3.20
   3  21   1   15.40    8.10
   5 -21   1    7.60    2.30
  -5 -21  -1    3.40    2.10
  -5 -21  -1    0.70    8.60
   5 -21   1    4.20    6.10
   5 -21   1    7.70    2.30
  -5  21  -1    2.30    6.70
   5  21   1    3.00    8.40
  -5  21  -1    5.10    2.90
   5  21   1    4.60    2.70
   7 -21   1   17.30    2.80
   7 -21   1   16.80    2.80
  -7 -21  -1    8.70   10.40
   7 -21   1   14.10    8.90
  -7 -21  -1    9.80    2.50
  -7  21  -1   23.70    3.40
   7  21   1   13.70    3.10
   7  21   1   -3.30    7.80
  -9 -21  -1    7.00    2.10
   9 -21   1    6.00    2.40
  -9 -21  -1    3.70   11.90
  -9  21  -1    7.80    2.90
   9  21   1    6.80    2.80
  11 -21   1    9.60    2.40
 -11 -21  -1   14.30    2.50
  11  21   1    8.00    2.70
 -11  21  -1    4.40    3.00
  13 -21   1    7.30    2.50
  13  21   1   18.30    3.00
 -13  21  -1    4.70    3.00
  15 -21   1    5.60    2.50
 -15 -21  -1    8.10    2.10
  15  21   1    7.10    2.70
 -15  21  -1    6.80    3.00
 -17 -21  -1    8.50    2.20
  17 -21   1    9.50    2.60
 -17  21  -1    9.60    3.00
  17  21   1    7.70    2.70
 -19 -21  -1    3.50    2.00
  19 -21   1    4.60    2.60
  19  21   1    5.20    2.60
 -19  21  -1    7.60    3.00
  21 -21   1   -2.70    2.60
 -21 -21  -1   -1.00    2.20
  21  21   1    0.20    2.50
 -21  21  -1    1.80    2.80
  23 -21   1    3.00    2.70
 -23 -21  -1   -0.50    2.20
 -23  21  -1    5.60    3.30
  23  21   1    1.30    2.70
 -25 -21  -1   13.60    2.90
  25 -21   1   25.20    3.40
 -25  21  -1   15.40    3.50
  25  21   1   16.20    3.10
  27 -21   1   12.40    2.90
 -27 -21  -1   11.60    2.60
 -27  21  -1    8.80    3.60
  27  21   1   10.10    2.80
  29 -21   1   13.30    3.10
 -29 -21  -1   10.20    2.60
  29  21   1   10.00    2.90
 -29  21  -1   10.00    3.50
 -31 -21  -1    7.30    2.50
  31 -21   1    6.80    3.00
  31  21   1    7.50    2.90
 -31  21  -1    6.30    3.40
 -28 -22   1    5.40    2.30
  28 -22  -1    3.80    3.00
  28  22  -1    4.00    2.80
 -28  22   1    3.70    3.30
 -26 -22   1    0.80    2.20
  26 -22  -1    2.40    2.80
 -26  22   1    3.90    3.40
  26  22  -1   -0.50    2.70
  24 -22  -1    6.40    2.80
 -24 -22   1    4.40    2.30
 -24  22   1    6.70    3.30
  24  22  -1    4.80    2.70
  22 -22  -1   25.70    3.60
 -22 -22   1   20.30    3.10
 -22  22   1   27.90    4.20
  22  22  -1   17.50    3.30
 -20 -22   1    9.50    2.50
  20 -22  -1    6.50    2.80
  20  22  -1    7.60    2.80
 -20  22   1    9.70    3.30
  18 -22  -1    0.60    2.50
 -18 -22   1   -0.20    2.10
  18  22  -1    2.50    2.60
 -18  22   1    0.80    3.10
  16 -22  -1   10.30    2.70
 -16 -22   1   12.60    2.40
  16  22  -1   13.20    2.90
 -16  22   1    9.90    3.10
  14 -22  -1    7.10    2.50
 -14 -22   1    5.20    2.10
  14  22  -1    6.20    2.70
 -14  22   1    6.30    3.10
 -12 -22   1    7.60    2.20
  12 -22  -1    9.00    2.50
 -12  22   1    9.20    3.00
  12  22  -1    2.50    2.70
 -10 -22   1   21.00    2.60
  10 -22  -1   11.60    2.80
 -10  22   1   12.20    3.30
  10  22  -1   20.30    3.10
   8 -22  -1   13.40    2.60
  -8 -22   1   12.60    2.30
  -8  22   1   11.80    3.10
   8  22  -1   12.60    2.80
  -6 -22   1   12.30    2.40
   6 -22  -1    9.70    2.50
  -6  22   1   13.30    3.10
   6  22  -1   10.00    2.90
   4 -22  -1   10.40    2.50
  -4 -22   1   13.30    2.40
  -4  22   1   14.90    3.10
   4  22  -1   10.80    3.00
   2 -22  -1    4.10    2.30
   2 -22  -1    0.20    2.10
  -2 -22   1   12.30    2.20
   2 -22  -1   -2.60   11.10
   2  22  -1    5.80    2.80
  -2  22   1    6.50    2.90
   0 -22   1   15.70    2.70
   0 -22  -1    4.80    7.00
   0 -22  -1   10.70    2.30
   0 -22  -1    8.70    2.50
   0  22   1   14.50   16.20
   0  22   1    9.80    7.60
   0  22  -1   14.70    3.10
   0  22   1   14.10    3.10
   2 -22   1   47.90    4.10
  -2 -22  -1   43.90    4.00
  -2 -22  -1   35.70   12.80
   2 -22   1   29.70    9.00
  -2 -22  -1   53.29    4.50
  -2  22  -1   41.90    4.20
  -2  22  -1   34.50    9.60
   2  22   1   50.29    4.40
   2  22   1   37.50   11.60
  -4 -22  -1   16.70   11.20
   4 -22   1   11.70    3.70
   4 -22   1   11.40    2.30
   4 -22   1    9.50    7.30
  -4 -22  -1   12.80    2.50
   4  22   1   15.10    3.00
   4  22   1    9.40    9.60
  -4  22  -1   10.10    3.00
  -6 -22  -1   16.10    2.90
   6 -22   1   19.40    3.00
   6 -22   1   22.80    3.10
  -6  22  -1   23.70    3.60
   6  22   1   25.40    3.30
  -8 -22  -1   30.10    3.40
   8 -22   1   33.20    3.50
   8  22   1   33.40    3.60
  -8  22  -1   30.40    3.90
  10 -22   1   45.40    4.10
 -10 -22  -1   42.50    3.90
 -10  22  -1   40.90    4.40
  10  22   1   41.80    4.20
  12 -22   1    7.00    2.40
 -12 -22  -1    5.60    2.20
 -12  22  -1    4.80    3.00
  12  22   1    6.40    2.70
  14 -22   1    3.10    2.40
 -14 -22  -1    1.60    2.10
 -14  22  -1    2.10    2.90
  14  22   1    1.30    2.70
 -16 -22  -1    7.90    2.20
  16 -22   1   12.80    2.80
  16  22   1    9.80    2.80
 -16  22  -1   10.70    3.20
 -18 -22  -1   -2.60    1.90
  18 -22   1   -0.70    2.50
 -18  22  -1    0.60    2.90
  18  22   1    0.50    2.60
  20 -22   1    2.70    2.70
 -20 -22  -1   -0.70    2.30
 -20  22  -1   -1.40    3.20
  20  22   1    3.70    2.70
 -22 -22  -1    9.20    2.50
  22 -22   1    8.60    2.90
 -22  22  -1    6.50    3.20
  22  22   1   11.00    2.80
  24 -22   1   10.20    2.90
 -24 -22  -1   10.40    2.70
  24  22   1   11.30    2.90
 -24  22  -1    8.60    3.20
 -26 -22  -1    1.70    2.40
  26 -22   1    2.20    2.90
  26  22   1    6.20    2.70
 -26  22  -1    4.70    3.40
  28 -22   1    6.20    3.00
 -28 -22  -1    9.30    2.60
 -28  22  -1    5.10    3.50
  28  22   1    5.30    2.90
 -27 -23   1    1.30    2.30
  27 -23  -1    0.60    3.00
  27  23  -1    1.50    2.80
 -27  23   1   -4.30    3.30
 -25 -23   1    4.90    2.30
  25 -23  -1    3.00    3.00
  25  23  -1    3.80    2.80
 -25  23   1    7.10    3.60
 -23 -23   1    3.60    2.30
  23 -23  -1    3.50    2.80
  23  23  -1    1.90    2.70
 -23  23   1    1.20    3.20
 -21 -23   1    3.50    2.30
  21 -23  -1    8.80    2.80
 -21  23   1    6.80    3.50
  21  23  -1    2.10    2.60
 -19 -23   1    4.10    2.50
  19 -23  -1    4.30    2.70
  19  23  -1    5.40    2.80
 -19  23   1    4.00    3.10
 -17 -23   1    9.20    2.30
  17 -23  -1   10.50    2.90
  17  23  -1   11.20    2.90
 -17  23   1    8.50    3.30
 -15 -23   1    2.00    2.20
  15 -23  -1    1.90    2.60
  15  23  -1    3.20    2.70
 -15  23   1    3.50    2.90
  13 -23  -1   16.00    2.90
 -13 -23   1   13.30    2.50
 -13  23   1   10.90    3.30
  13  23  -1   14.80    3.00
 -11 -23   1    3.10    2.10
  11 -23  -1    2.70    2.50
  11  23  -1    0.70    2.60
 -11  23   1    3.20    3.00
   9 -23  -1   15.50    2.70
  -9 -23   1   13.60    2.40
   9  23  -1   12.10    2.90
  -9  23   1   14.50    3.20
   7 -23  -1   32.80    3.50
  -7 -23   1   28.40    3.20
  -7  23   1   28.50    3.90
   7  23  -1   24.80    3.60
   5 -23  -1   22.20    3.20
  -5 -23   1   20.20    2.90
  -5  23   1   19.10    3.50
   5  23  -1   17.80    3.20
   3 -23  -1   11.00    2.60
  -3 -23   1   11.70    2.50
   3  23  -1   15.70    3.10
  -3  23   1   16.50    3.20
   1 -23  -1   25.30    3.30
  -1 -23   1   25.10    3.10
   1 -23  -1   18.90    3.10
   1  23  -1   27.10    3.50
  -1  23   1   28.20    3.60
   1 -23   1   16.10    2.80
  -1 -23  -1   13.80    2.70
   1  23   1   14.30    3.00
  -1  23  -1   19.30    3.20
   3 -23   1   10.50    2.40
  -3 -23  -1   10.00    2.50
  -3  23  -1    9.10    2.80
   3  23   1   13.90    3.10
  -5 -23  -1    5.40    2.30
   5 -23   1    5.10    2.60
   5  23   1   10.20    2.90
  -5  23  -1    7.50    3.00
  -7 -23  -1   38.30    3.90
   7 -23   1   42.60    4.20
  -7  23  -1   44.00    4.40
   7  23   1   43.70    4.20
   9 -23   1   19.10    3.30
  -9 -23  -1   14.60    2.90
  -9  23  -1   20.80    3.40
   9  23   1   19.30    3.10
  11 -23   1    5.30    2.50
 -11 -23  -1    6.60    2.20
  11  23   1    3.70    2.80
 -11  23  -1    2.50    2.90
  13 -23   1   -0.20    2.60
 -13 -23  -1    2.40    2.20
  13  23   1    0.80    2.70
 -13  23  -1    3.70    3.00
 -15 -23  -1   -1.40    2.10
  15 -23   1    2.00    2.60
  15  23   1    0.10    2.70
 -15  23  -1    0.40    3.00
  17 -23   1    7.50    2.80
 -17 -23  -1    4.30    2.20
  17  23   1    6.40    2.90
 -17  23  -1    3.20    3.10
 -19 -23  -1   11.40    2.60
  19 -23   1   13.60    3.10
  19  23   1   11.20    3.10
 -19  23  -1    7.10    3.30
 -21 -23  -1    6.40    2.30
  21 -23   1    2.30    2.80
  21  23   1    5.00    2.80
 -21  23  -1    4.00    3.10
  23 -23   1    7.90    3.00
 -23 -23  -1    8.00    2.70
  23  23   1    7.20    2.90
 -23  23  -1    5.50    3.40
 -25 -23  -1    9.60    2.60
  25 -23   1   15.30    3.20
 -25  23  -1    8.90    3.40
  25  23   1   10.20    3.00
  27 -23   1    0.80    2.90
 -27 -23  -1    2.40    2.40
  27  23   1    1.50    2.80
  24 -24  -1    1.70    2.90
 -24 -24   1   -1.60    2.20
  24  24  -1    1.80    2.80
 -24  24   1    0.70    3.40
 -22 -24   1    4.30    2.40
  22 -24  -1    9.60    3.10
  22  24  -1    7.60    3.00
 -22  24   1    5.40    3.20
 -20 -24   1    3.10    2.30
  20 -24  -1    3.70    2.90
  20  24  -1    2.80    2.80
 -20  24   1    6.20    3.30
  18 -24  -1    6.60    2.80
 -18 -24   1    6.00    2.50
 -18  24   1    5.30    3.30
  18  24  -1    3.50    2.80
 -16 -24   1   16.80    2.90
  16 -24  -1   19.30    3.50
  16  24  -1   17.00    3.30
 -16  24   1   20.00    3.50
  14 -24  -1   13.20    3.10
 -14 -24   1   16.10    2.70
 -14  24   1   13.20    3.50
  14  24  -1   15.10    3.10
  12 -24  -1    1.80    2.70
 -12 -24   1    4.90    2.30
  12  24  -1    7.50    2.80
 -12  24   1    5.30    3.10
 -10 -24   1    5.20    2.10
  10 -24  -1    3.50    2.50
  10  24  -1    5.10    2.90
 -10  24   1    3.20    3.10
   8 -24  -1    6.60    2.60
  -8 -24   1    9.00    2.40
  -8  24   1    6.40    3.10
   8  24  -1    6.40    2.90
   6 -24  -1    6.40    2.50
  -6 -24   1    6.20    2.20
  -6  24   1    7.90    3.10
   6  24  -1    5.00    2.80
  -4 -24   1   16.90    3.00
   4 -24  -1   23.10    3.30
  -4  24   1   30.10    3.70
   4  24  -1   16.80    3.30
  -2 -24   1    7.80    2.30
  -2  24   1    4.40    3.00
   2  24  -1    8.70    3.00
   0 -24   1   24.60    3.20
   0  24   1   21.50    3.40
   0  24  -1   26.20    3.50
  -2 -24  -1   16.80    3.20
   2 -24   1   20.40    3.10
   2  24   1   29.50    3.60
  -2  24  -1   24.50    3.60
  -4 -24  -1   16.30    3.00
   4 -24   1   16.20    4.50
  -4  24  -1   15.00    3.10
   4  24   1   20.30    3.30
  -6 -24  -1    7.30    2.40
  -6  24  -1   11.60    3.10
   6  24   1   14.90    3.10
  -8 -24  -1   11.70    2.60
   8  24   1   11.10    3.10
  -8  24  -1   10.20    3.20
 -10 -24  -1   22.80    3.30
  10 -24   1   30.20    3.70
  10  24   1   30.70    3.70
 -10  24  -1   29.30    3.80
  12 -24   1    6.50    2.70
 -12 -24  -1    3.50    2.20
 -12  24  -1    2.40    2.90
  12  24   1    7.80    2.90
 -14 -24  -1    6.10    2.40
  14 -24   1    5.60    2.80
 -14  24  -1    7.00    3.10
  14  24   1    6.90    2.90
  16 -24   1   22.70    3.50
 -16 -24  -1   16.10    2.90
  16  24   1   14.40    3.20
 -16  24  -1   16.40    3.50
 -18 -24  -1    9.80    2.60
  18 -24   1    9.20    2.90
 -18  24  -1    9.50    3.20
  18  24   1    8.90    3.00
  20 -24   1   10.00    3.10
 -20 -24  -1    5.30    2.40
 -20  24  -1    9.50    3.40
  20  24   1    5.00    2.90
 -22 -24  -1    9.10    2.80
  22 -24   1    9.60    3.10
  22  24   1   11.10    3.00
 -22  24  -1    6.30    3.30
 -24 -24  -1    2.20    2.40
  24 -24   1   -1.90    2.90
 -24  24  -1    2.70    3.10
  24  24   1    1.40    3.00
  21 -25  -1    1.00    3.00
 -21 -25   1    1.20    2.40
  21  25  -1    0.40    2.80
[truncated: 2,633,772 more chars]
